# Supplementary material for: Trueness and Precision of Four Intraoral Scanners in Oral Implantology: A Comparative in Vitro Study
Source: PubMed Central journal article supplement (PMC5042463; doi:10.1371/journal.pone.0163107), 2016-09-29
Supplement: pone.0163107.s001.pdf [file pone.0163107.s001.pdf]

# **Trueness and Precision of Four Intraoral Scanners in Oral Implantology: a Comparative in Vitro Study**

Francesco G. Mangano <sup>1, 2, ¶, \*</sup>, Giovanni Veronesi <sup>3, &</sup>, Uli Hauschild <sup>4, &</sup>, Eitan Mijiritsky <sup>5</sup>, and Carlo Mangano <sup>2, ¶</sup>

## **SUPPORTING INFORMATIONS**

## VALIDATION OF THE MANUFACTURER'S DATA FOR THE REFERENCE SCANNER (IMETRIC) IN BOTH THE PARTIALLY AND TOTALLY EDENTULOUS MODELS.

Methods. The two stone models (partially and a totally edentulous maxilla, respectively) were scanned with the reference scanner; three scans were taken for each model. For each model, all generated datasets were imported into a powerful reverse-engineering software (Studio 2012<sup>®</sup>, Geomagic, Morrisville, NC, USA) and superimposed each other, in order to validate the manufacturer's data. One dataset for each model was then selected as the reference dataset (R1) for the trueness measurements of all intraoral scanners.

Results. The manufacturer's data of the reference scanner were validated, since a minimal difference was found between the difference scans ( $6.3 \pm 6.6$  micrometers in the partially edentulous model;  $14.4 \pm 7.9$  micrometers in the fully edentulous model).

VALIDATION OF THE MANUFACTURER DATA

PARTIALLY EDENTULOUS MODEL

Values setting: 0.25, 0.02, -0.02, -0.25

3 different scans with Imetric are taken and superimposed each other,  
IN ORDER TO VALIDATE THE MANUFACTURER'S DATA.

The final result was a precision of  $6.3 \pm 6.6$  micrometers.

# Validation of manufacturer's data the partially edentulous model

# Imetric 1 vs Imetric 2

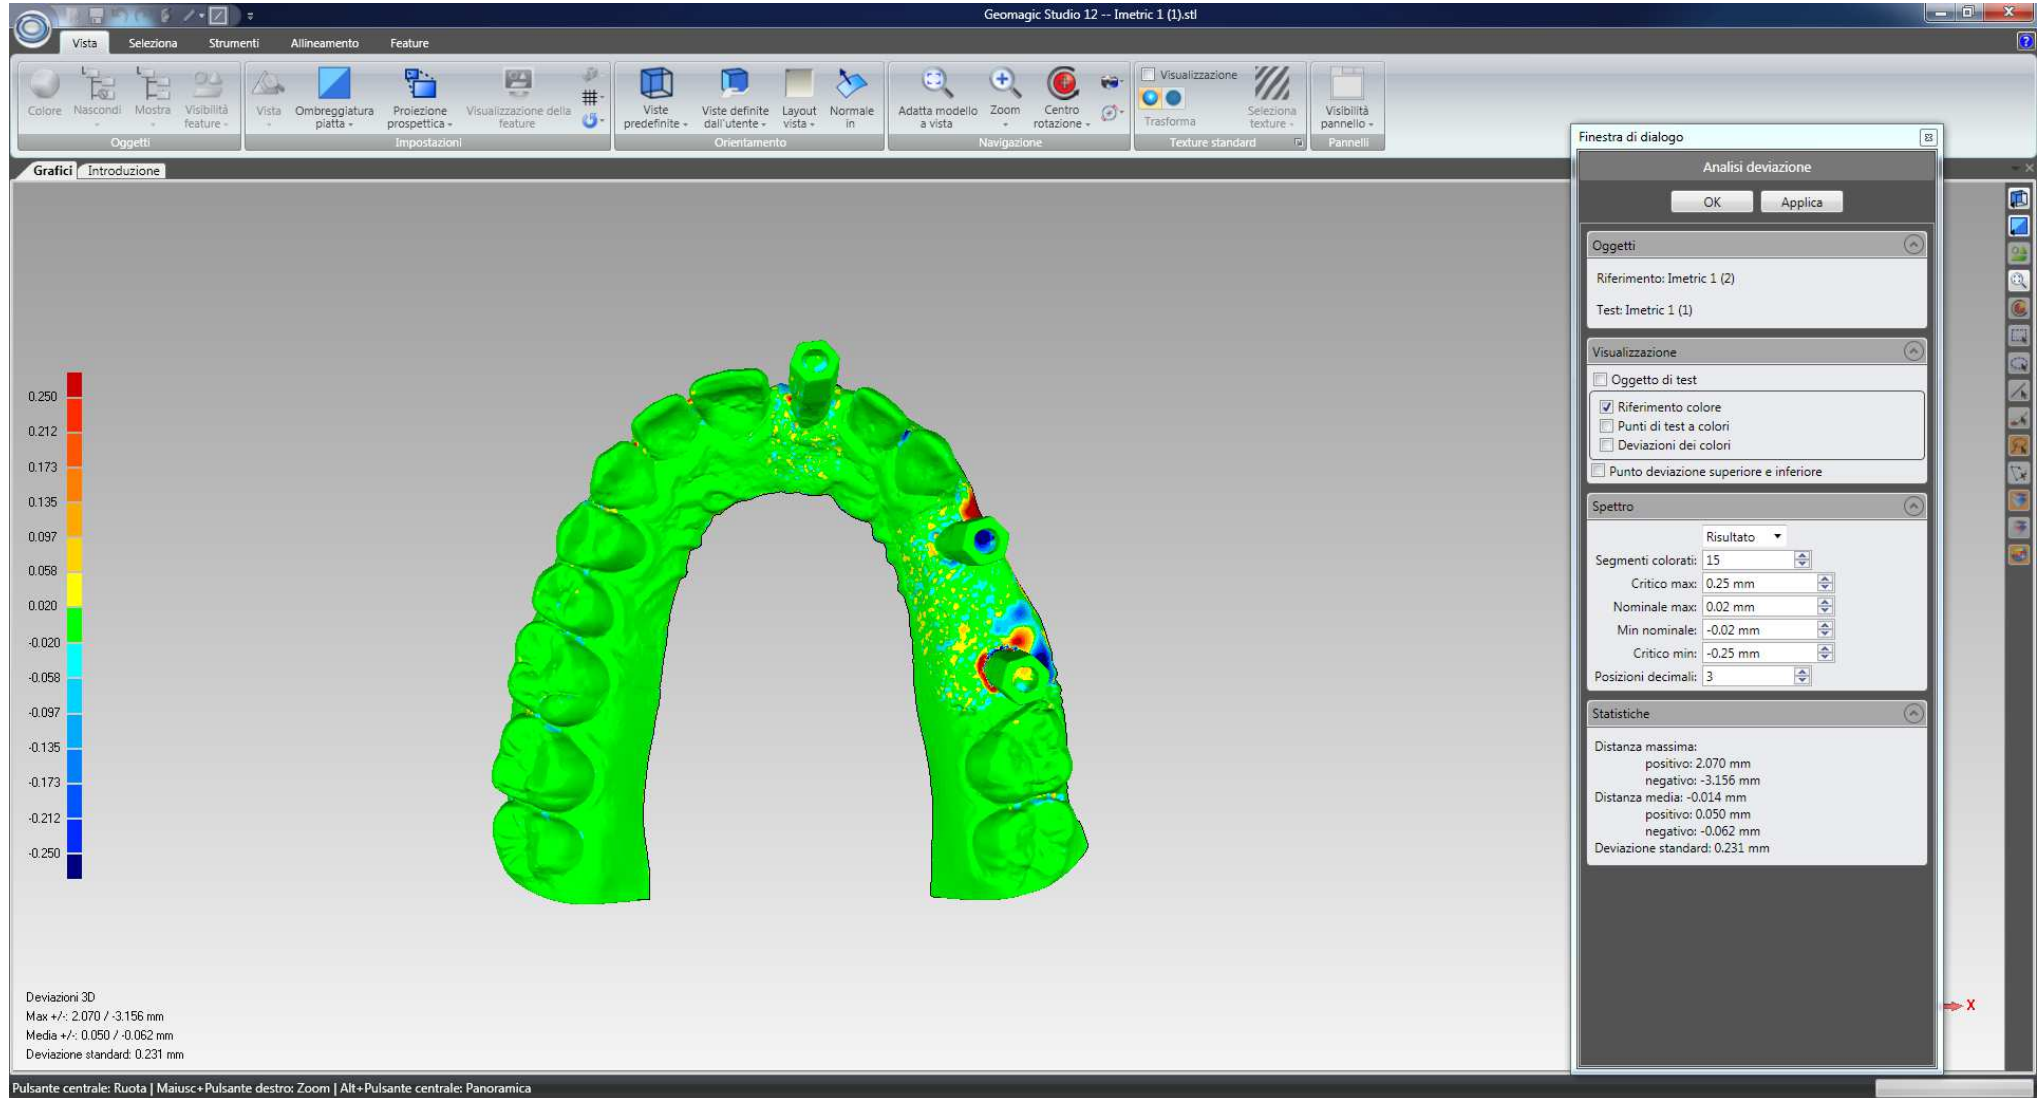

# Imetric 1 vs Imetric 2

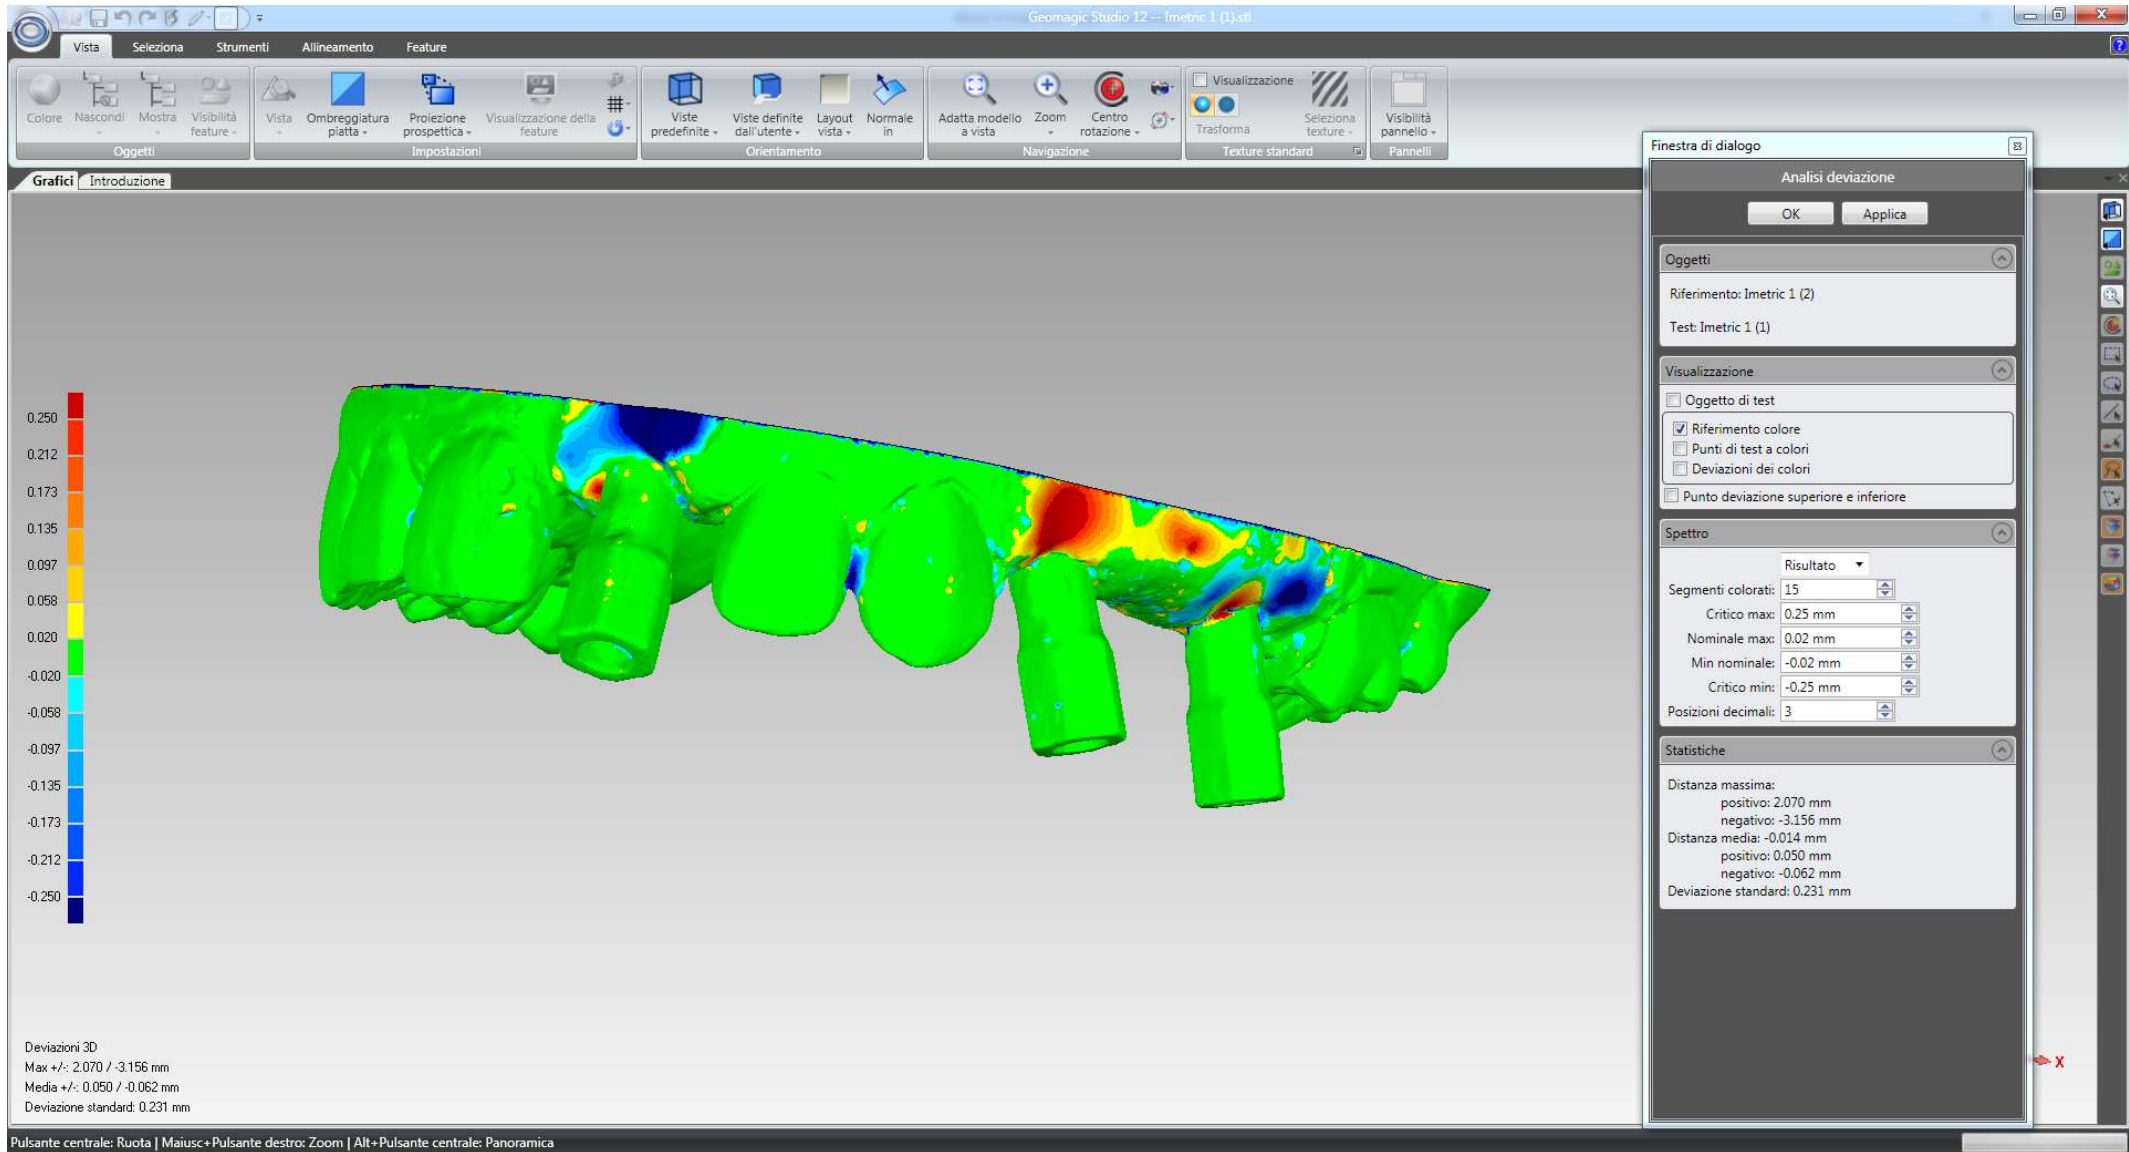

# Imetric 1 vs Imetric 2

**Deviazioni 3D**  
Max +/-: 2.070 / -3.156 mm  
Media +/-: 0.050 / -0.062 mm  
Deviazione standard: 0.231 mm

**Finestra di dialogo**  
Analisi deviazione

OK    Applica

Oggetti  
Riferimento: Imetric 1 (2)  
Test: Imetric 1 (1)

Visualizzazione  
 Oggetto di test  
 Riferimento colore  
 Punti di test a colori  
 Deviazioni dei colori  
 Punto deviazione superiore e inferiore

Spettro  
Risultato  
Segmenti colorati: 15  
Critico max: 0.25 mm  
Nominale max: 0.02 mm  
Min nominale: -0.02 mm  
Critico min: -0.25 mm  
Posizioni decimali: 3

Statistiche  
Distanza massima:  
  positivo: 2.070 mm  
  negativo: -3.156 mm  
Distanza media: -0.014 mm  
  positivo: 0.050 mm  
  negativo: -0.062 mm  
Deviazione standard: 0.231 mm

Pulsante centrale: Ruota | Maiusc+Pulsante destro: Zoom | Alt+Pulsante centrale: Panoramica

IT 15:47 30/12/2015

# Imetric 2 vs Imetric 3

Geomagic Studio 12 -- Imetric 1 (2).stl

**Finestra di dialogo**

**Analisi deviazione**

OK    Applica

Oggetti

Riferimento: Imetric 1 (3)

Test: Imetric 1 (2)

Visualizzazione

Oggetto di test

Riferimento colore

Punti di test a colori

Deviazioni dei colori

Punto deviazione superiore e inferiore

Spettro

Risultato

Segmenti colorati: 15

Critico max: 0.25 mm

Nominale max: 0.02 mm

Min nominale: -0.02 mm

Critico min: -0.25 mm

Posizioni decimali: 3

Statistiche

Distanza massima:  
positivo: 1.309 mm  
negativo: -1.345 mm

Distanza media: 0.002 mm  
positivo: 0.011 mm  
negativo: -0.016 mm

Deviazione standard: 0.057 mm

Deviazioni 3D  
Max +/-: 1.309 / -1.345 mm  
Media +/-: 0.011 / -0.016 mm  
Deviazione standard: 0.057 mm

Pulsante centrale: Ruota | Maiusc+Pulsante destro: Zoom | Alt+Pulsante centrale: Panoramica

IT 15:53 30/12/2015

# Imetric 2 vs Imetric 3

Geomagic Studio 12 -- Imetric 1 (2).stl

Vista Selezione Strumenti Allineamento Feature

Oggetti: Colore, Nascondi, Mostra, Visibilità feature, Vista, Ombreggiatura piatta, Proiezione prospettica, Visualizzazione della feature, Viste predefinite, Viste definite dall'utente, Layout vista, Normale in, Adatta modello a vista, Zoom, Centro rotazione, Visualizzazione, Trasforma, Selezione texture, Visibilità pannello

Grafici Introduzione

0.250  
0.212  
0.173  
0.135  
0.097  
0.058  
0.020  
-0.020  
-0.058  
-0.097  
-0.135  
-0.173  
-0.212  
-0.250

Deviations 3D  
Max +/-: 1.309 / -1.345 mm  
Media +/-: 0.011 / -0.016 mm  
Deviazione standard: 0.057 mm

Pulsante centrale: Ruota | Maiusc+Pulsante destro: Zoom | Alt+Pulsante centrale: Panoramica

Finestra di dialogo

Analisi deviazione

OK Applica

Oggetti

Riferimento: Imetric 1 (3)  
Test: Imetric 1 (2)

Visualizzazione

Oggetto di test  
 Riferimento colore  
 Punti di test a colori  
 Deviazioni dei colori  
 Punto deviazione superiore e inferiore

Spettro

Risultato

Segmenti colorati: 15  
Critico max: 0.25 mm  
Nominale max: 0.02 mm  
Min nominale: -0.02 mm  
Critico min: -0.25 mm  
Posizioni decimali: 3

Statistiche

Distanza massima:  
positivo: 1.309 mm  
negativo: -1.345 mm  
Distanza media: 0.002 mm  
positivo: 0.011 mm  
negativo: -0.016 mm  
Deviazione standard: 0.057 mm

IT 15:54  
30/12/2015



## Imetric 2 vs Imetric 3

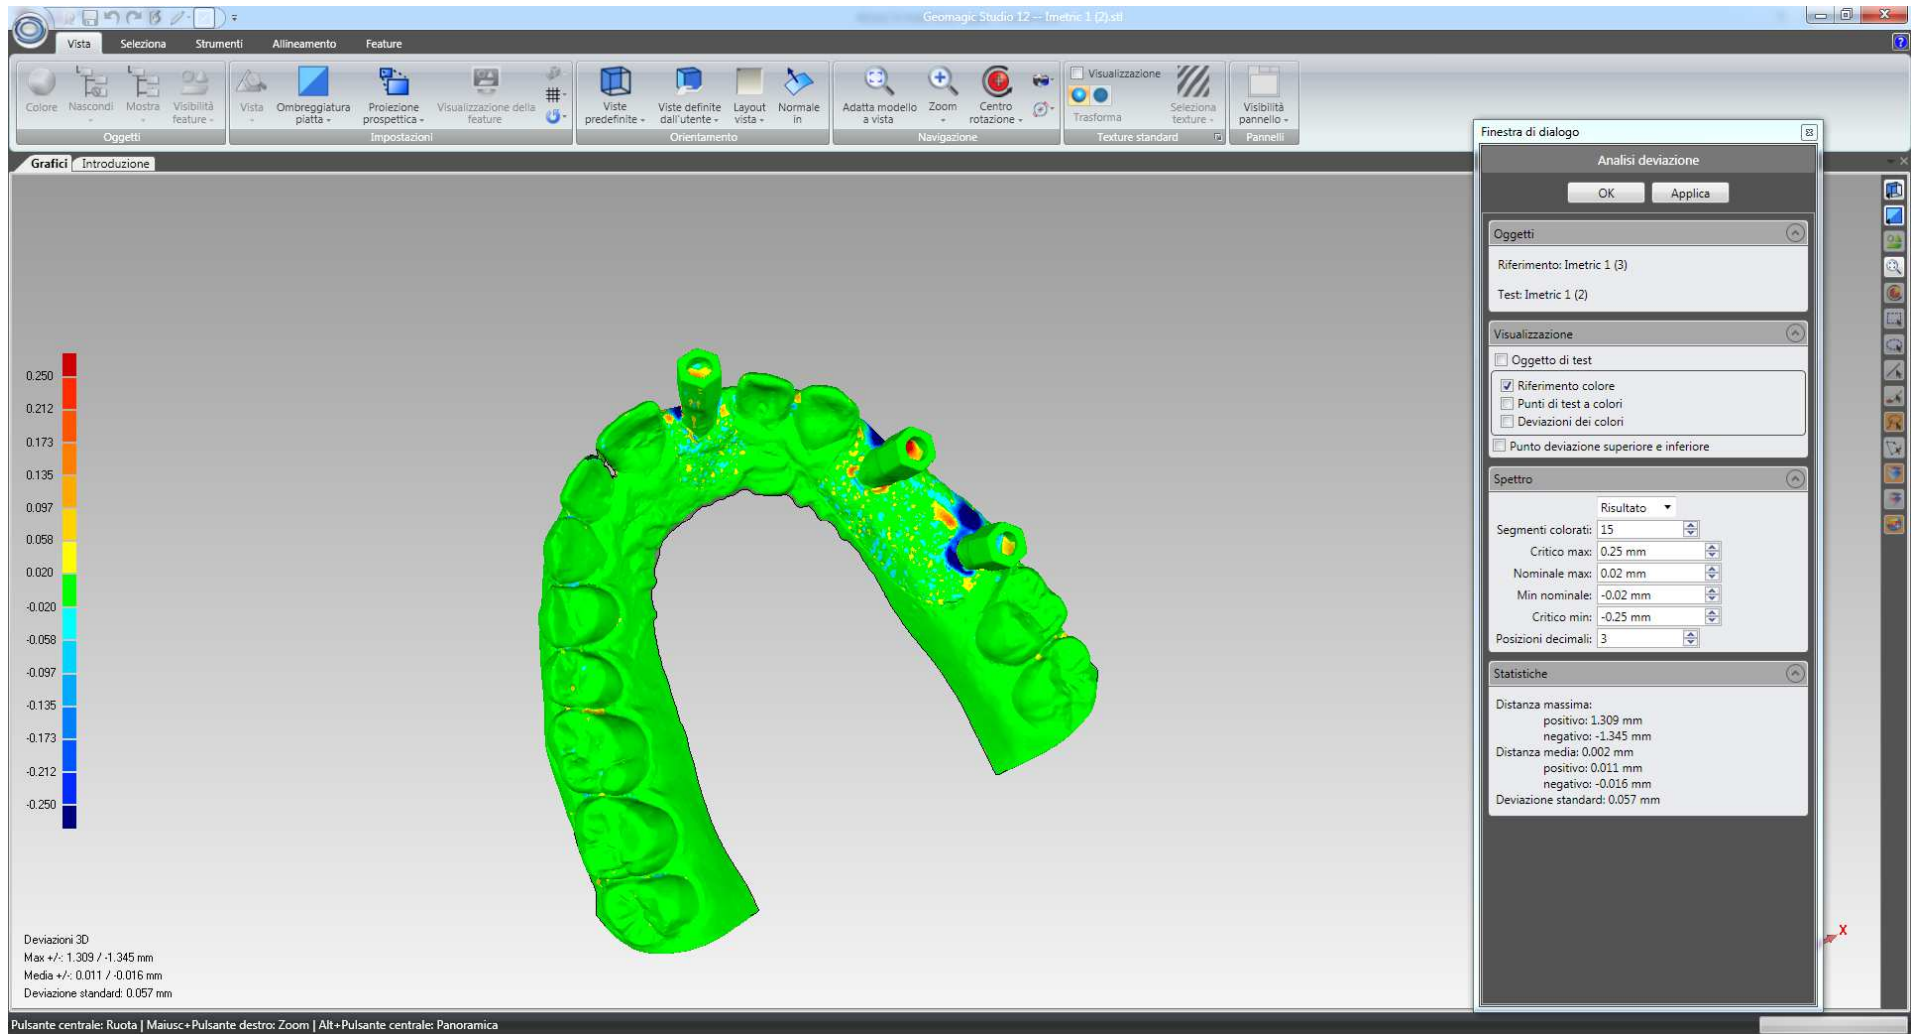

# Imetric 1 vs Imetric 3

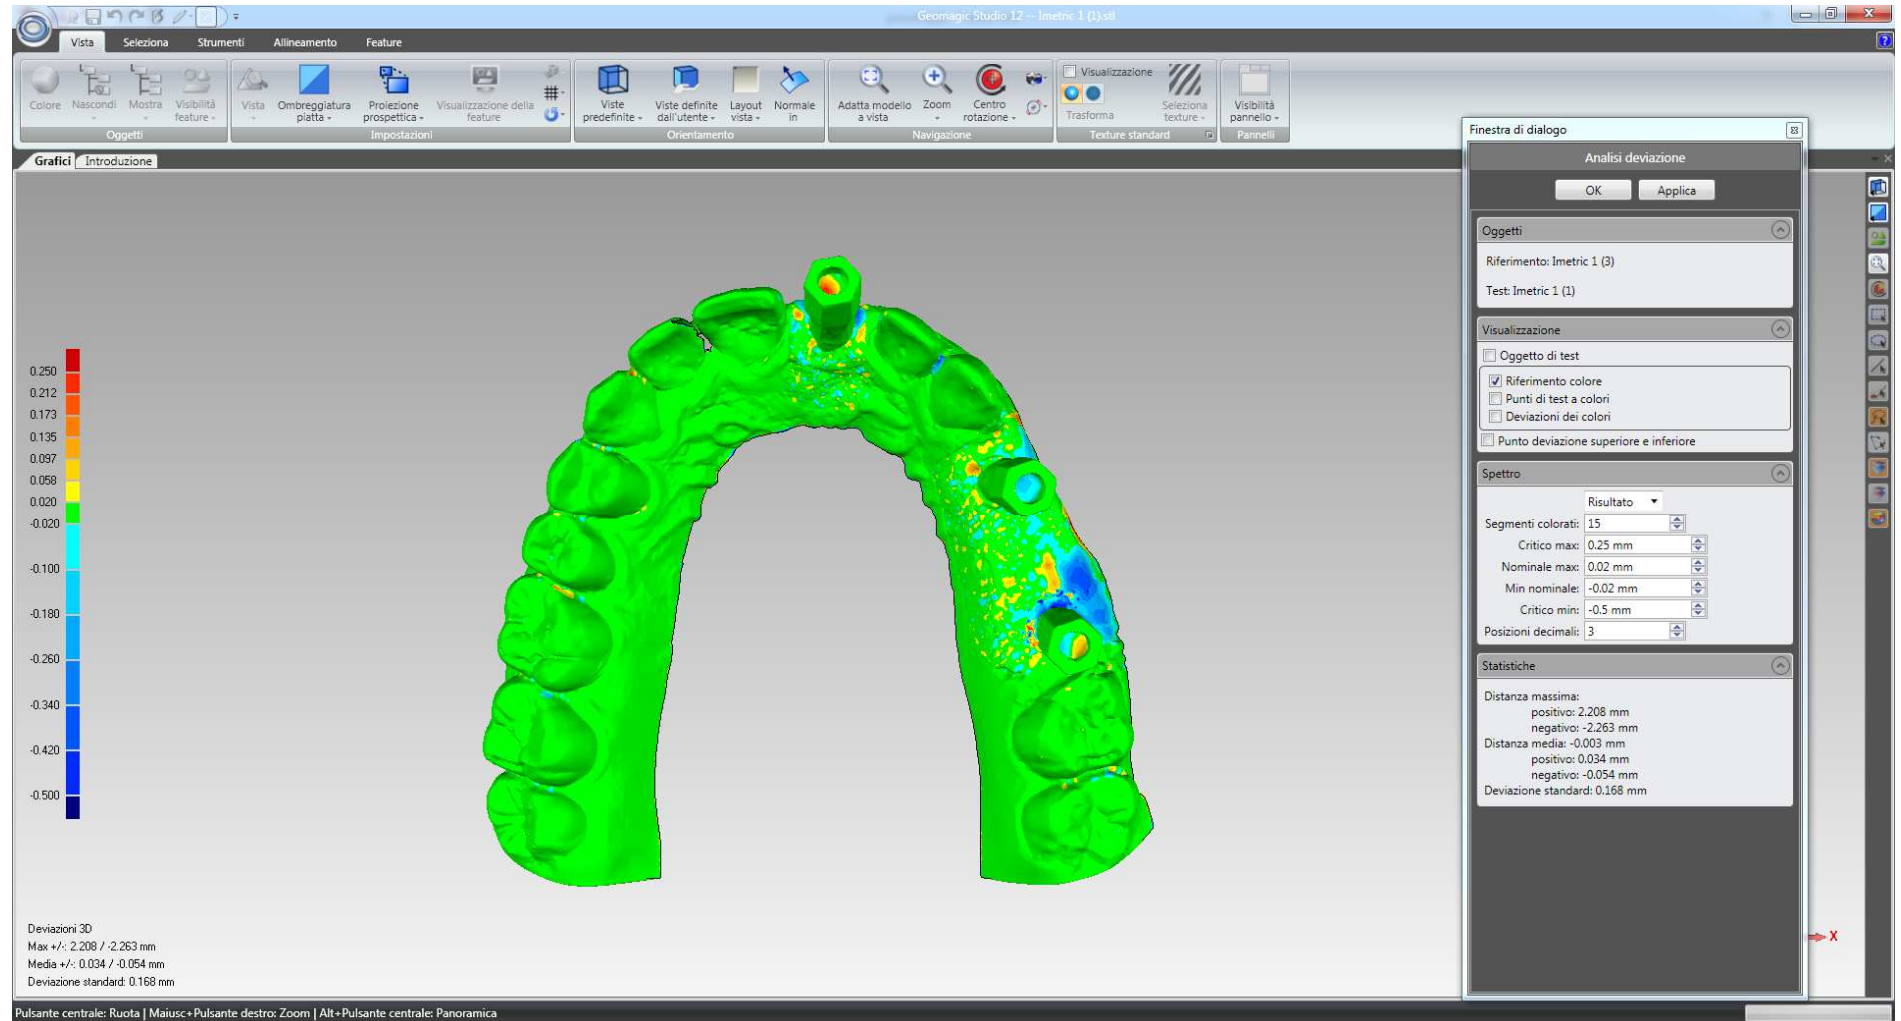

# Imetric 1 vs Imetric 3

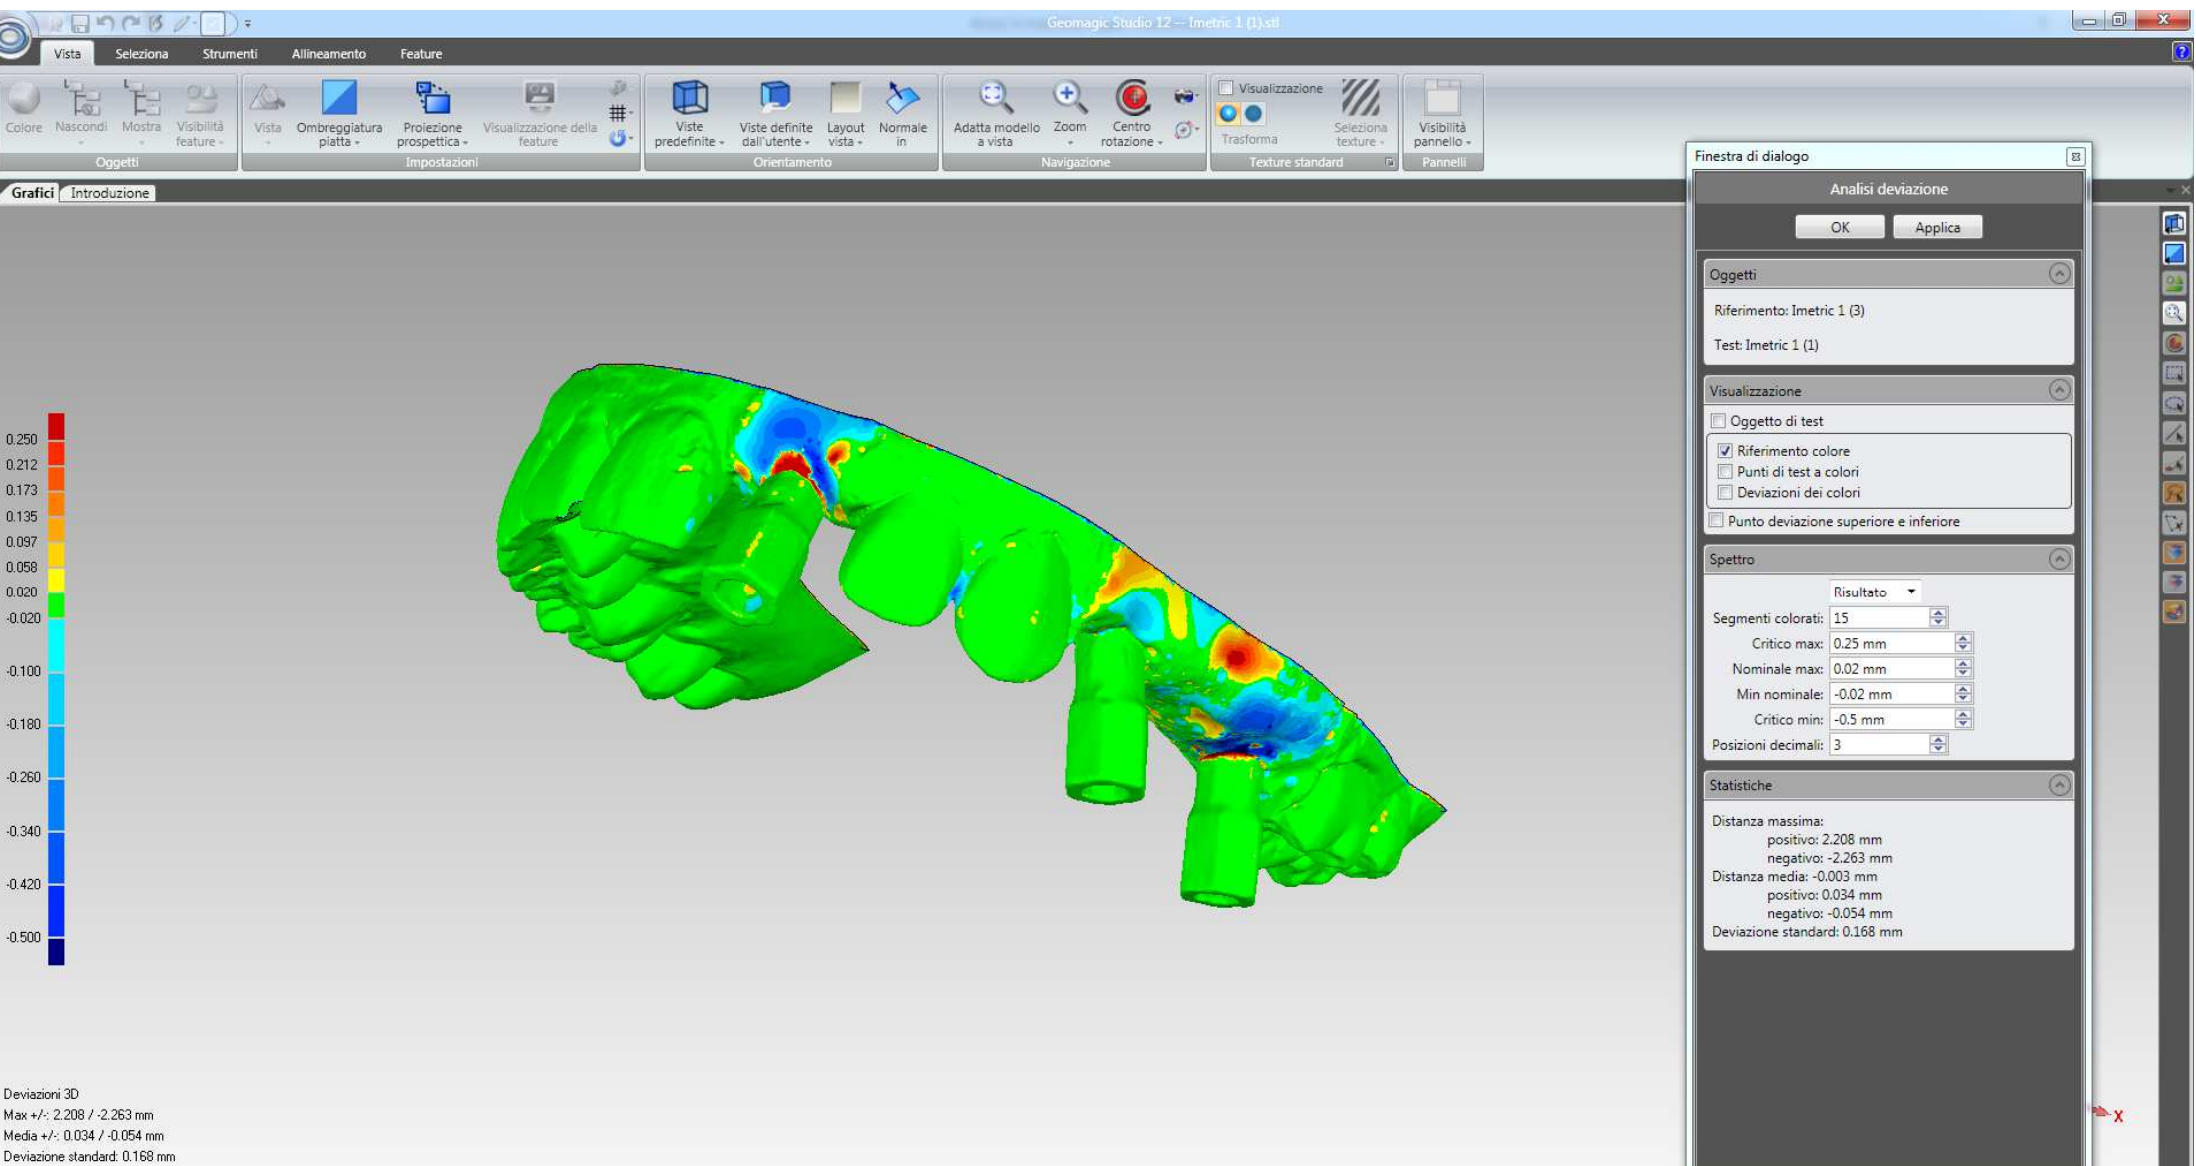

# Imetric 1 vs Imetric 3

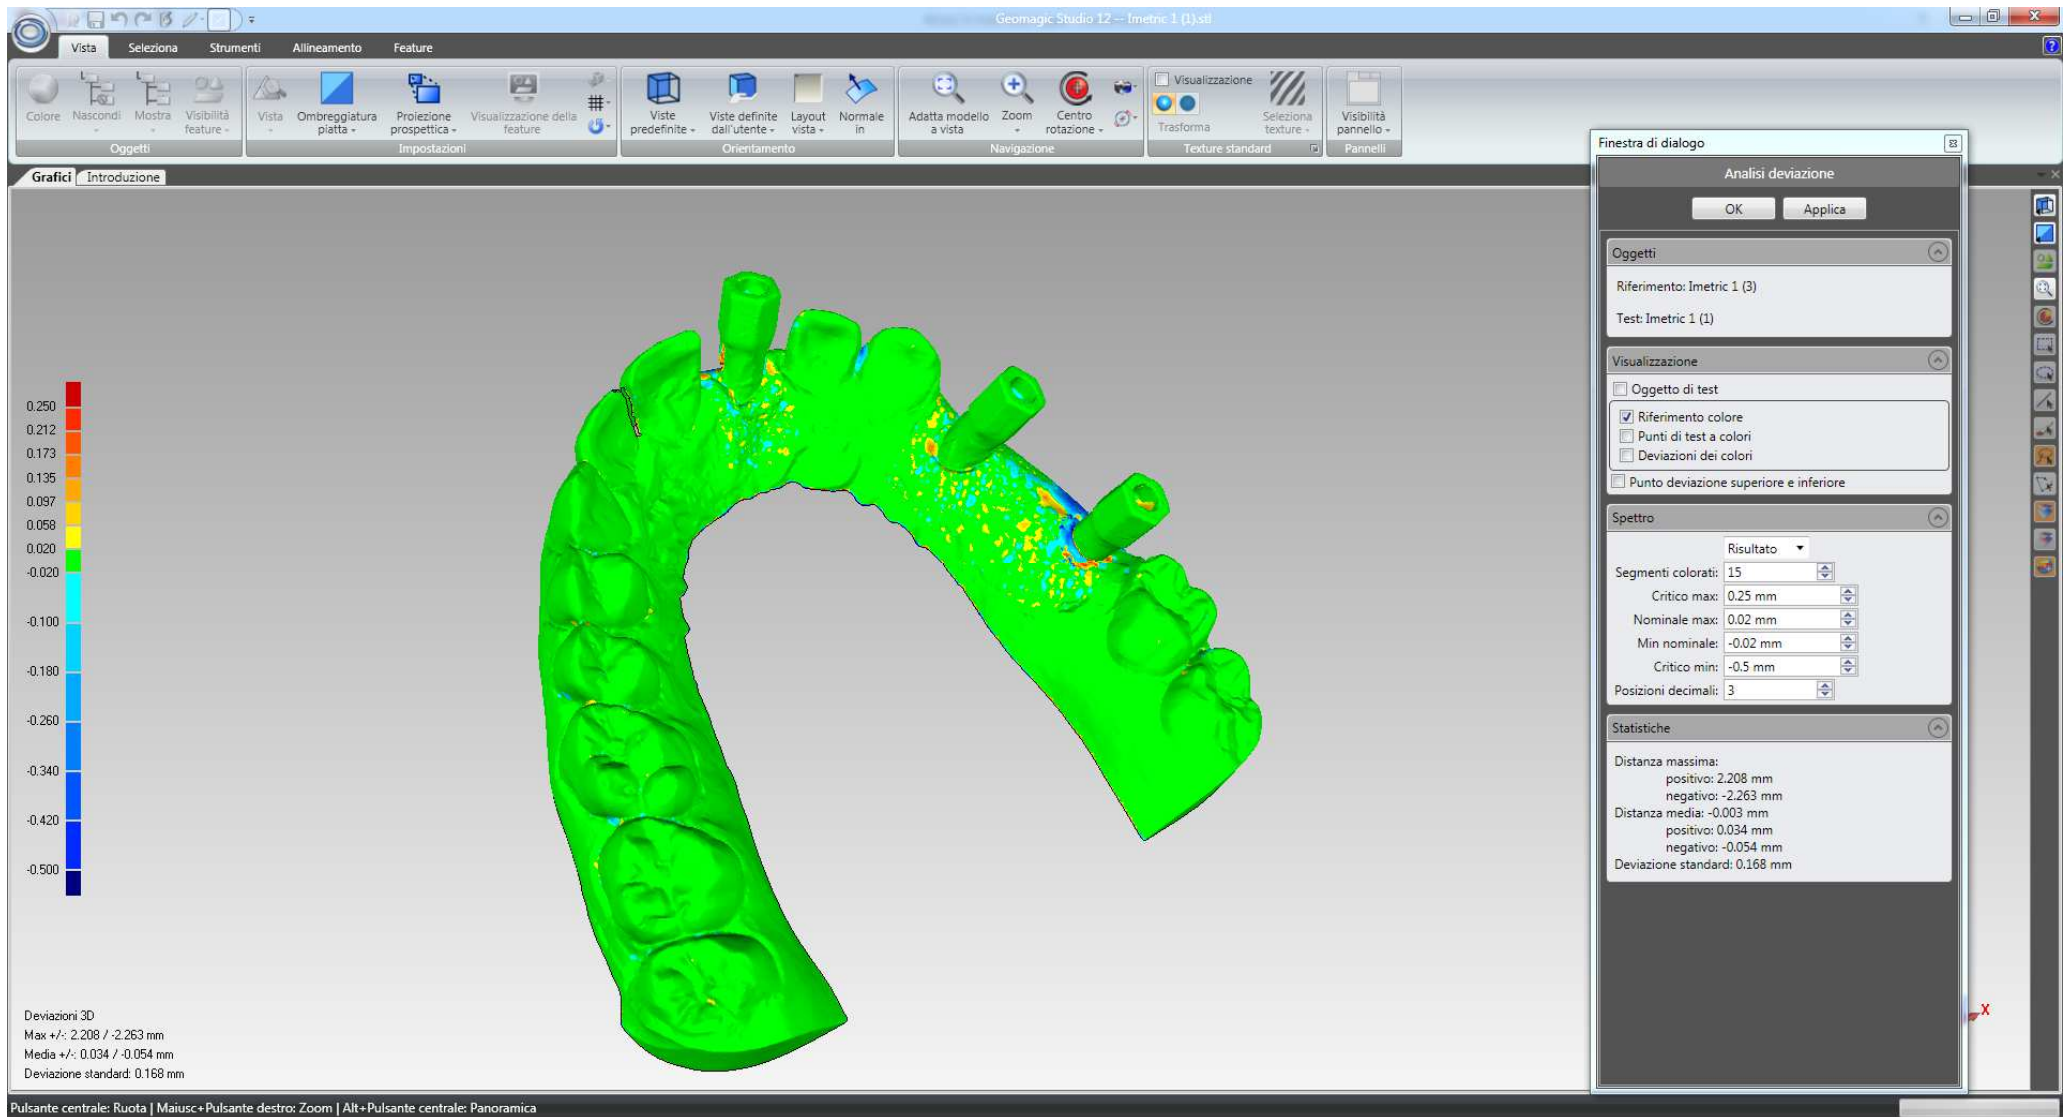

VALIDATION OF THE MANUFACTURER DATA

TOTALLY EDENTULOUS MODEL

Values setting: 0.25, 0.02, -0.02, -0.25

3 different scans with Imetric are taken and superimposed each other,  
IN ORDER TO VALIDATE THE MANUFACTURER'S DATA.

The final result was a precision of  $14.4 \pm 7.9$  micrometers.

# GENERAL TRUENESS AND PRECISION. VALIDITY/RELIABILITY OF THE REGISTRATION METHODS. CALIBRATION

Before to start with the superimposition of 3D models, for the evaluation of general trueness and precision, the validity of the method was tested, and the following operations were made for both the partially and totally edentulous models. In brief, the reference R1 model was imported in the reverse engineering software, duplicated and moved to another position in the space; these two identical models were then superimposed and registered, and the software calculated the difference between the two surfaces. This test was repeated 5 times per each model (overall, 10 tests were made) and the final result was a negligible mean registration error ( $2.8 \pm 3.0$  nanometers in the partially edentulous maxilla;  $3.2 \pm 1.7$  nanometers in the fully edentulous maxilla): this certified the reliability of the procedure.

In the following slides you can find the validation process. We started with the 5 tests for the partially edentulous model, and we complete the calibration with the completely edentulous model.

Step 1: the reference R1 model was imported in the reverse engineering software, duplicated and moved to another location

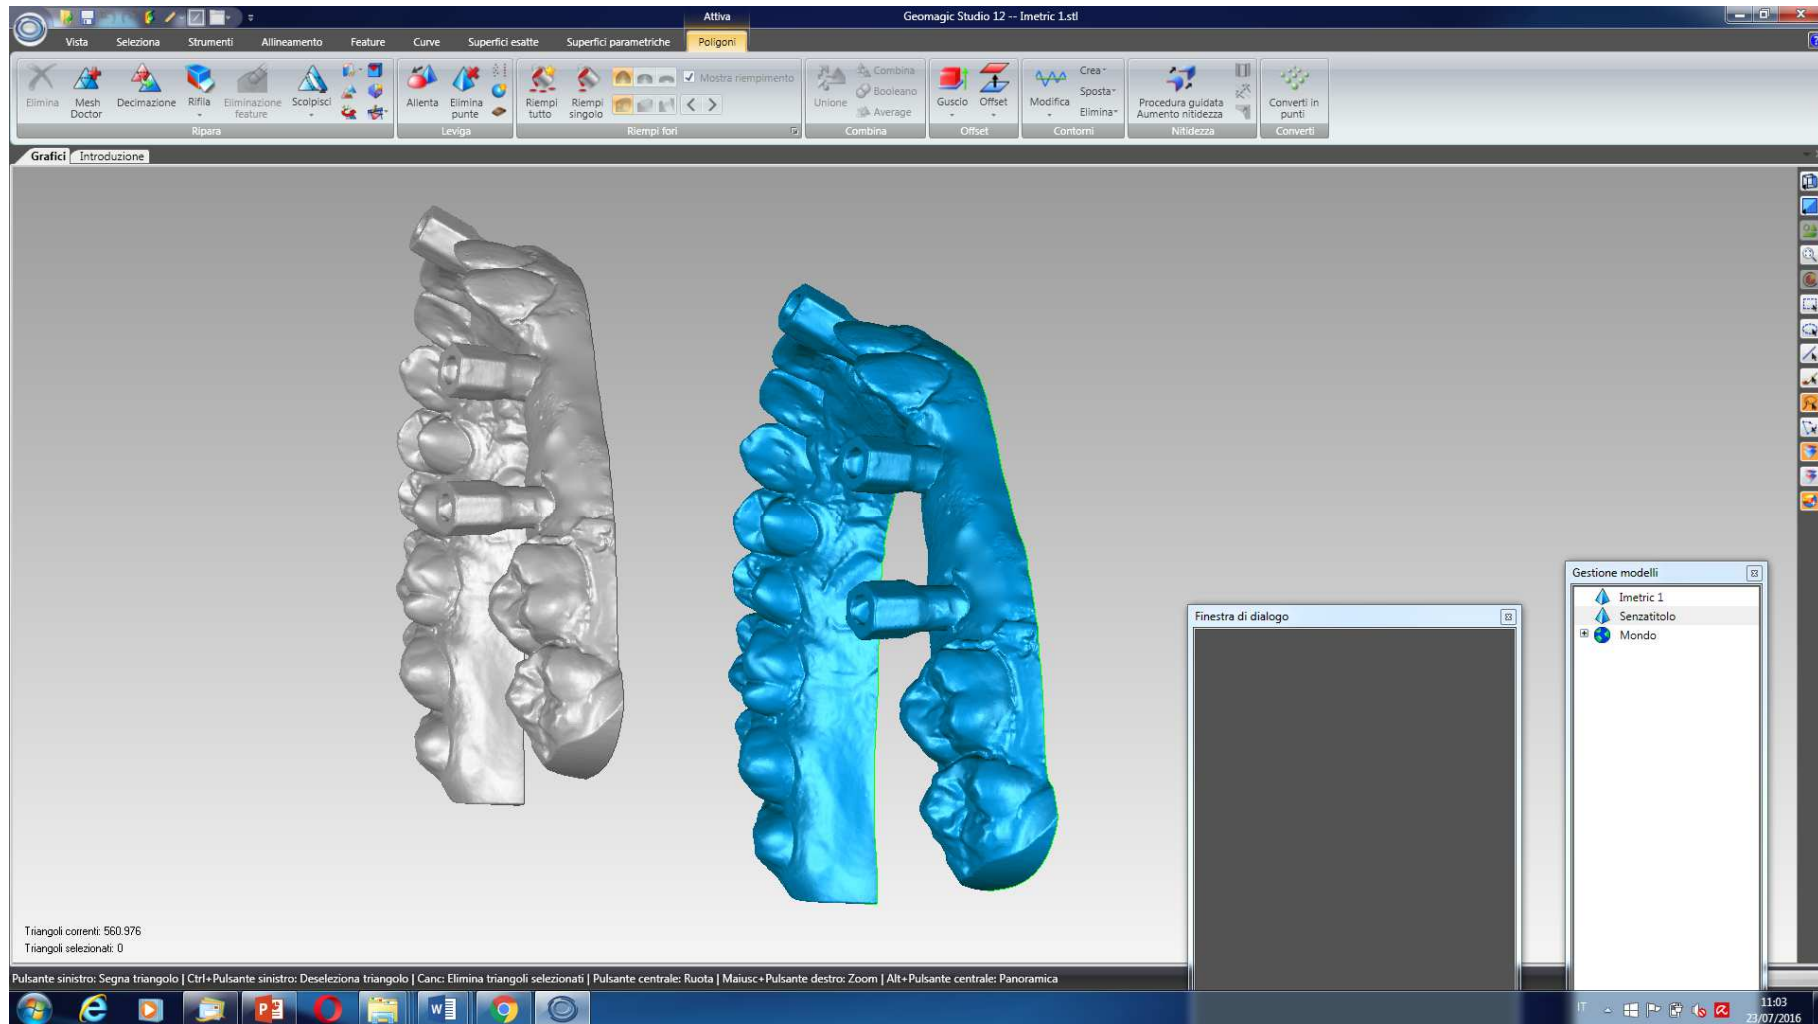

These two identical models were then superimposed and registered, first with the “three point registration..”

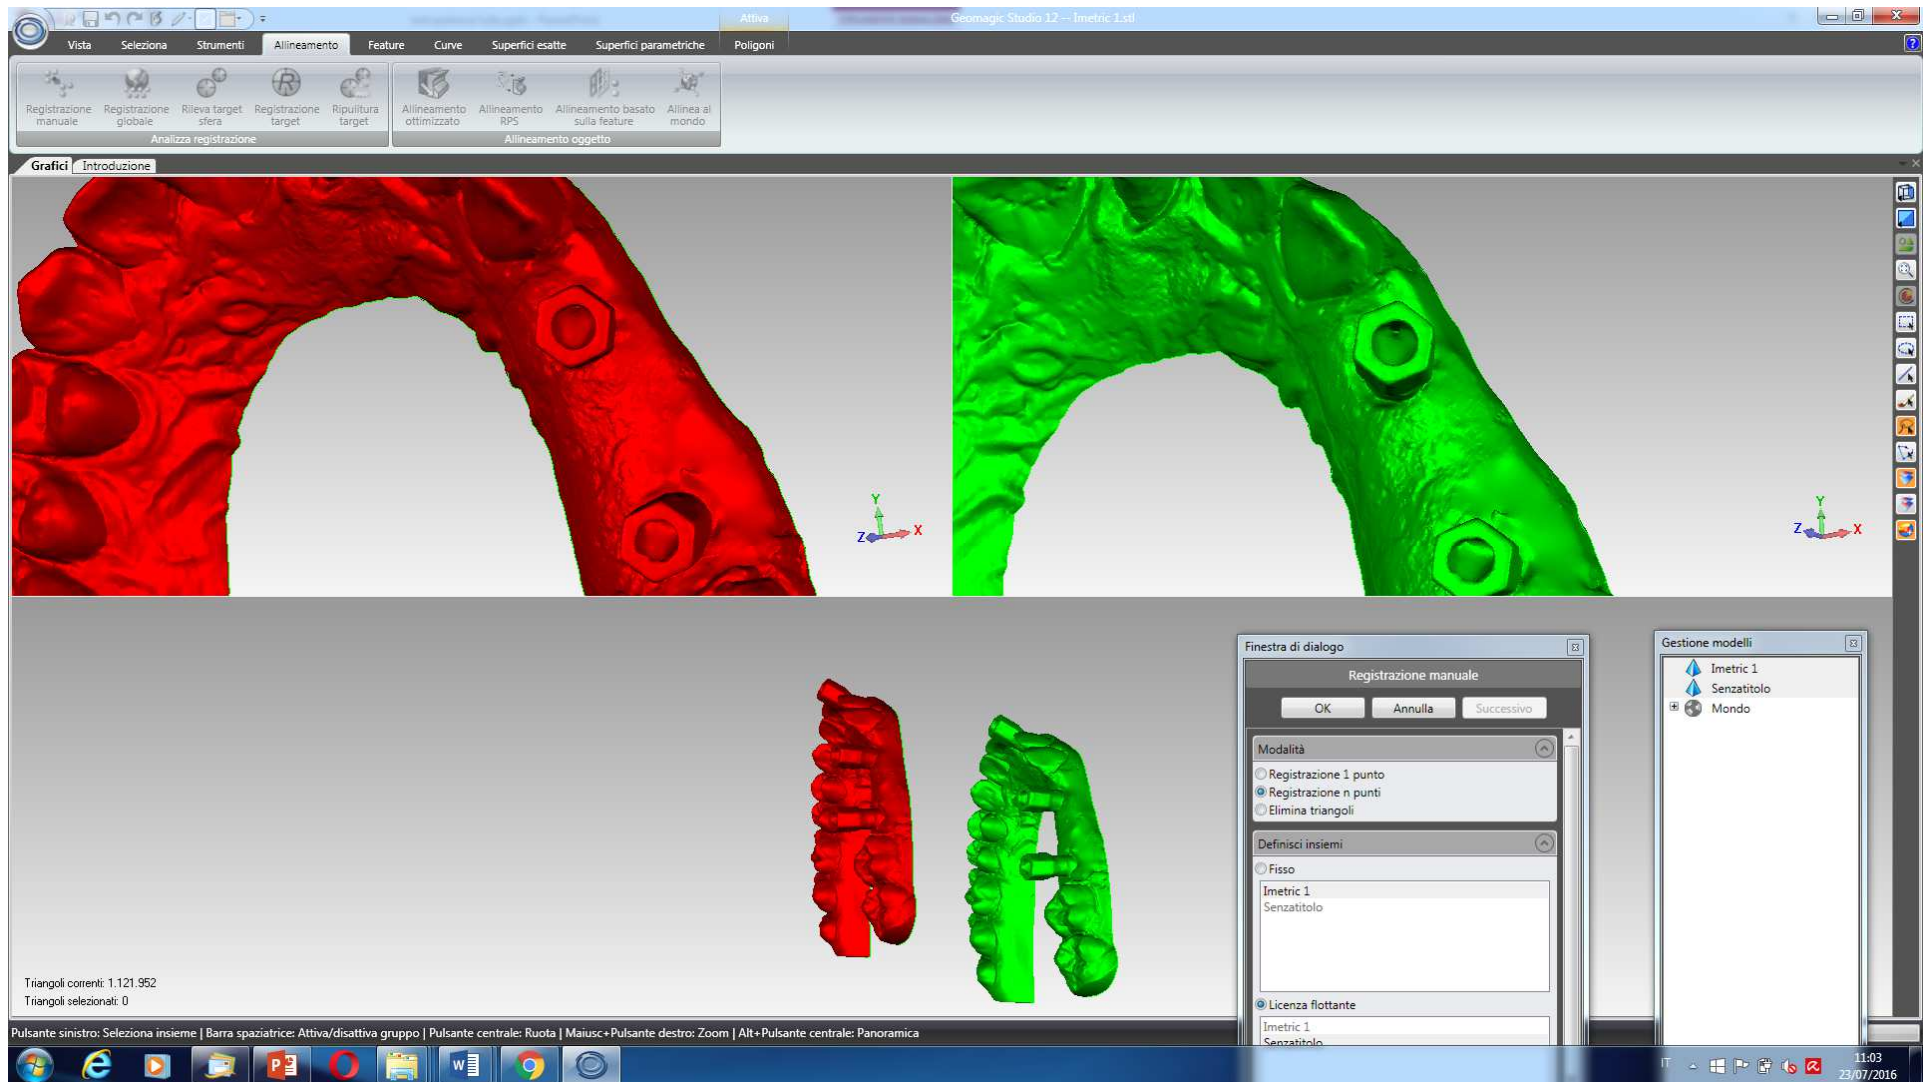



..then with the robust-iterative-closest-point (RICP), which was used for the final superimposition..

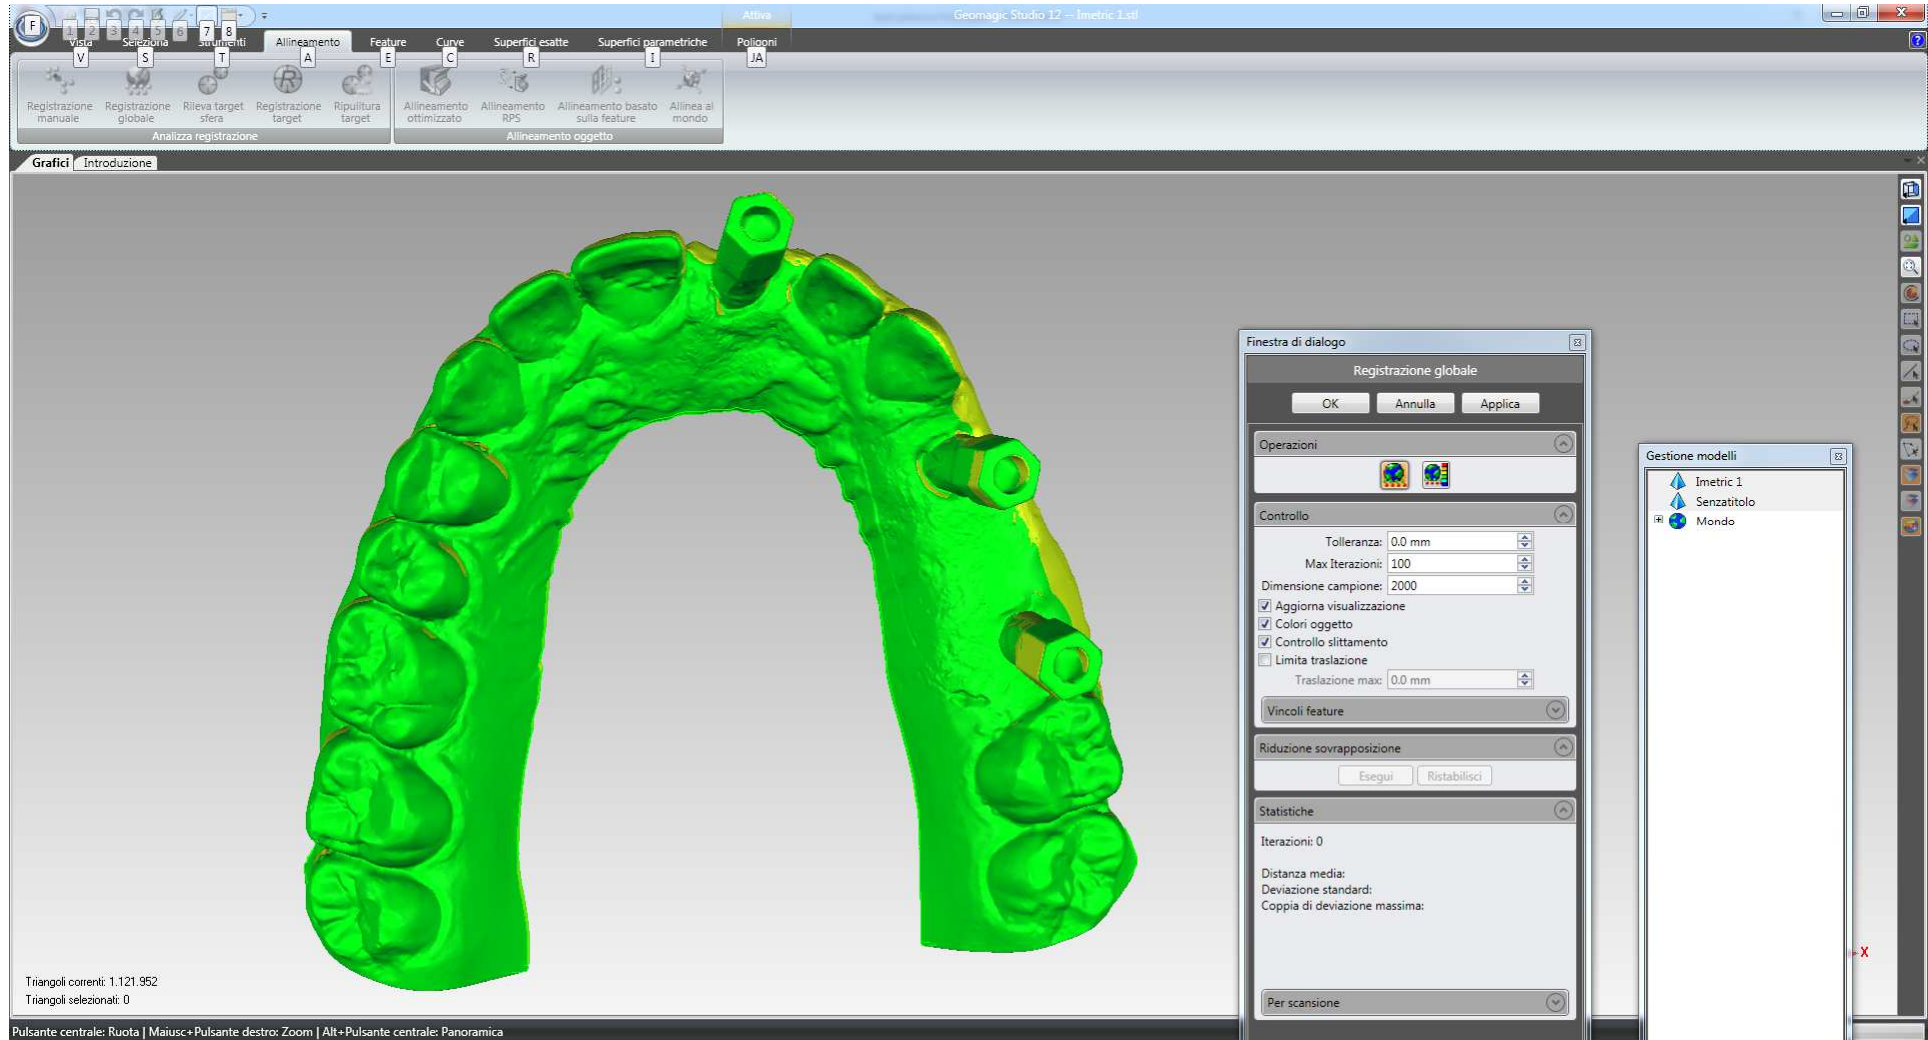

Then with the robust-iterative-closest-point (RICP), which was used for the final superimposition..

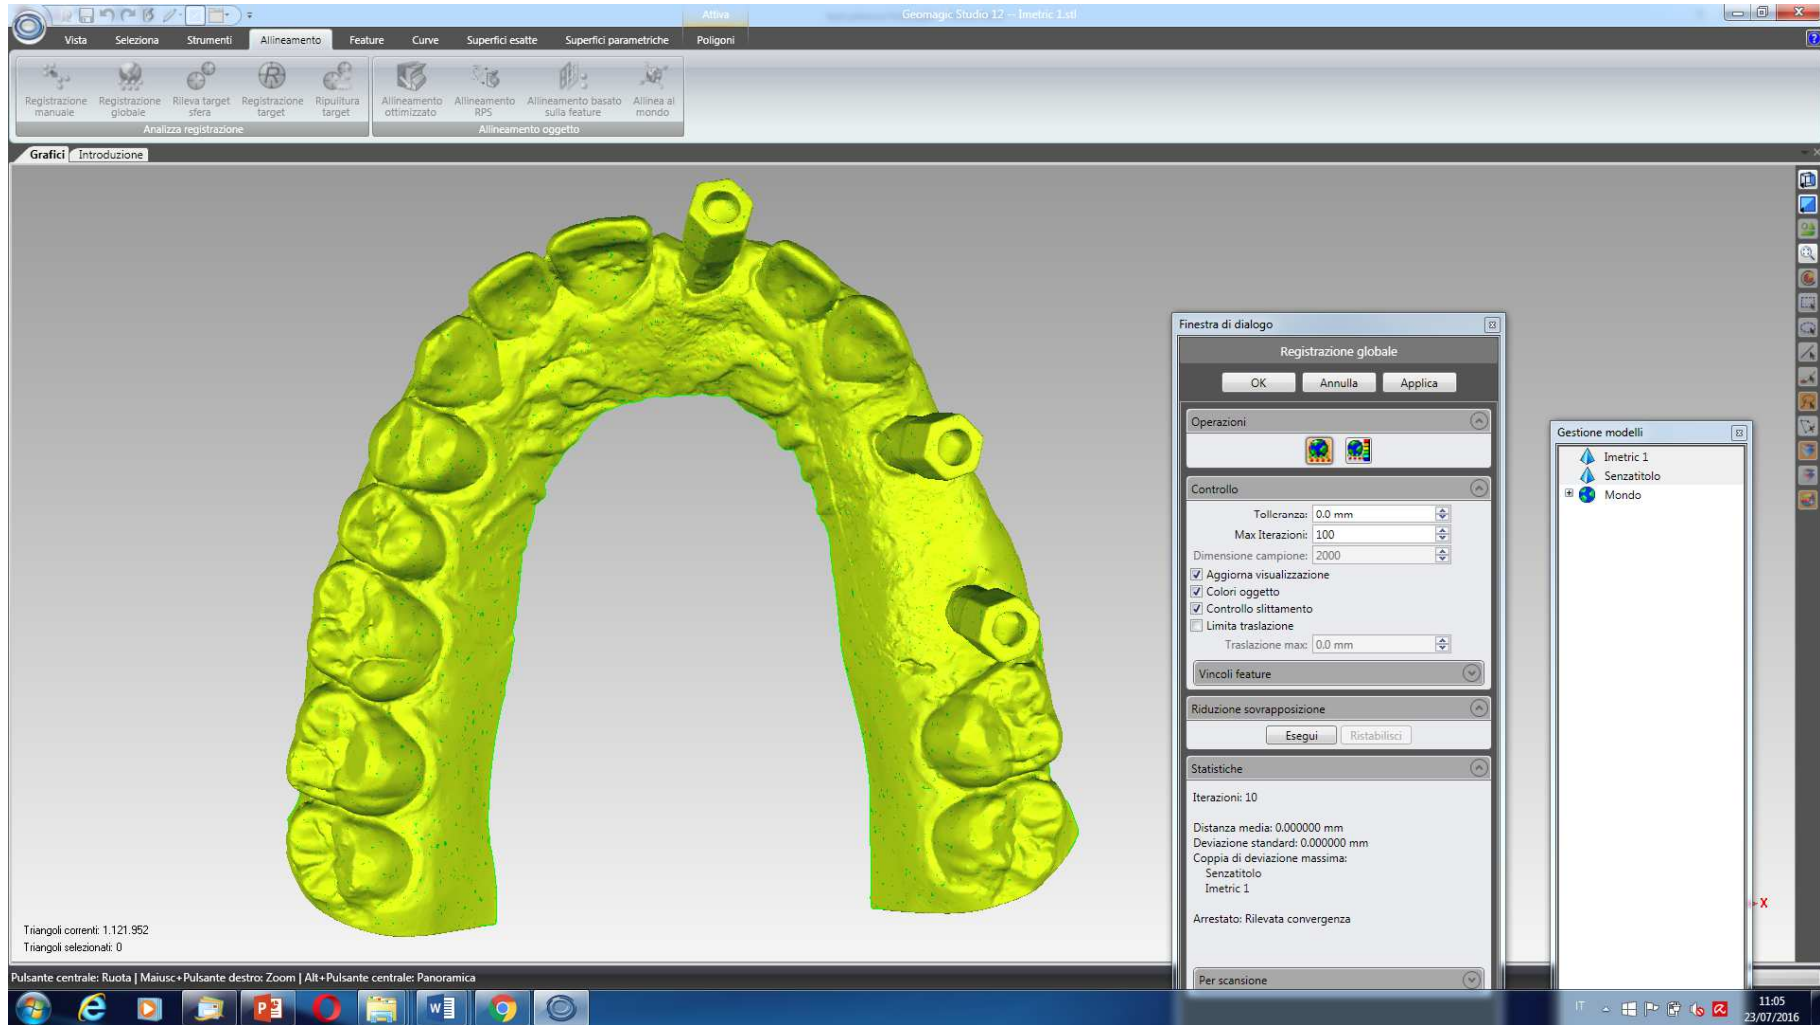

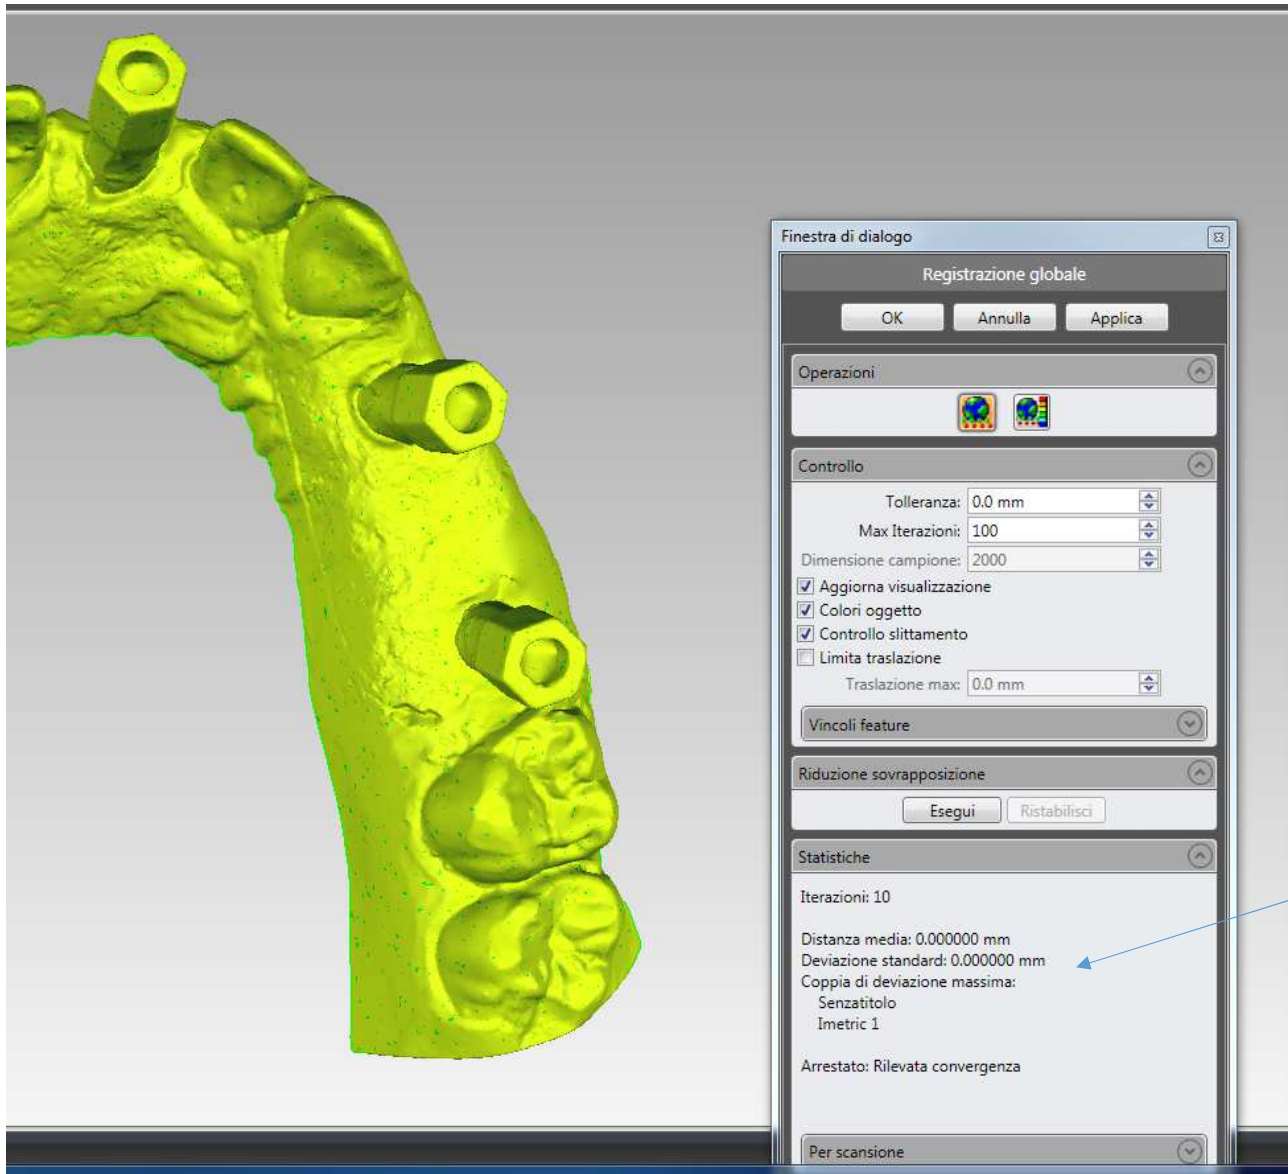

In this first test, the error was 0 nm

The overlapping was perfect

Then the same test was repeated 4 times in order to verify the validity of the registration/ overlapping method, for the same model (the partially edentulous model)

# Test n° 2

The screenshot displays the Geomagic Studio 12 interface. The main window shows a 3D model of a dental arch, rendered in a greenish-yellow color. The software's menu bar includes options like Vista, Selezione, Strumenti, Allineamento, Feature, Curve, Superfici esatte, Superfici parametriche, and Poligoni. The toolbar below the menu bar contains various registration and alignment tools, such as 'Registrazione manuale', 'Registrazione globale', 'Rileva target sfera', 'Registrazione target', 'Ripulitura target', 'Allineamento ottimizzato', 'Allineamento RPS', 'Allineamento basato sulla feature', and 'Allinea al mondo'. The 'Allineamento' menu is currently active.

On the right side, a 'Finestra di dialogo' (Dialog Box) titled 'Registrazione globale' (Global Registration) is open. It contains the following settings:

- Operazioni:** Includes icons for registration and alignment.
- Controllo:**
  - Tolleranza: 0,0 mm
  - Max Iterazioni: 100
  - Dimensione campione: 2000
  - Aggiorna visualizzazione
  - Colori oggetto
  - Controllo slittamento
  - Limita traslazione
  - Traslazione max: 0,0 mm
- Vincoli feature:** A dropdown menu.
- Riduzione sovrapposizione:** Includes 'Esegui' and 'Ristabilisci' buttons.
- Statistiche:**
  - Iterazioni: 23
  - Distanza media: 0.000006 mm
  - Deviazione standard: 0.000005 mm
  - Coppia di deviazione massima: Senzaticolo
  - Imetric 1
  - Arrestato: Rilevata convergenza
- Per scansione:** A dropdown menu.

At the bottom left of the main window, the following statistics are displayed:

- Triangoli corenti: 1.121.952
- Triangoli selezionati: 0

The status bar at the very bottom provides navigation instructions: 'Pulsante centrale: Ruota | Maiusc+Pulsante destro: Zoom | Alt+Pulsante centrale: Panoramica'.

# Test n° 3

The screenshot displays the Geomagic Studio 12 interface. The main window shows a 3D model of a dental arch, rendered in yellow and green. The software's menu bar includes options like Vista, Selezione, Strumenti, Allineamento, Feature, Curve, Superfici esatte, Superfici parametriche, and Poligoni. The toolbar contains various registration and alignment tools. A dialog box titled "Finestra di dialogo" is open, showing the "Registrazione globale" settings. The "Operazioni" section includes icons for registration. The "Controllo" section has fields for Tolleranza (0.0 mm), Max Iterazioni (100), and Dimensione campione (2000). The "Vincoli feature" section is expanded. The "Riduzione sovrapposizione" section has "Esegui" and "Ristabilisci" buttons. The "Statistiche" section shows 11 iterations, a mean distance of 0.000000 mm, and a standard deviation of 0.000000 mm. The "Gestione modelli" panel on the right shows a tree view with "Imetric 1", "Senzatitolo", and "Mondo".

Triangoli correnti: 1.121.952  
Triangoli selezionati: 0

Pulsante centrale: Ruota | Maiusc+Pulsante destro: Zoom | Alt+Pulsante centrale: Panoramica

# Test n° 4

The screenshot displays the Geomagic Studio 12 interface. The main window shows a 3D model of a dental arch, rendered in green. The software's menu bar includes options like Vista, Selezione, Strumenti, Allineamento, Feature, Curve, Superfici esatte, Superfici parametriche, and Poligoni. A toolbar below the menu bar contains various registration and alignment tools. The 'Grafici' window is active, showing the 3D model. In the bottom-left corner, the status bar indicates 'Triangoli correnti: 1.121.952' and 'Triangoli selezionati: 0'. A dialog box titled 'Finestra di dialogo' is open, showing the 'Registrazione globale' settings. The dialog box includes sections for 'Operazioni', 'Controllo', 'Riduzione sovrapposizione', and 'Statistiche'. The 'Controllo' section shows 'Tolleranza: 0.0 mm', 'Max Iterazioni: 100', and 'Dimensione campione: 2000'. The 'Statistiche' section shows 'Iterazioni: 37', 'Distanza media: 0.000006 mm', 'Deviazione standard: 0.000005 mm', and 'Coppia di deviazione massima: Senzaititolo, Imetric 1'. The 'Arrestato: Rilevata convergenza' status is also visible. A 'Gestione modelli' window is open on the right, showing a list of models: 'Imetric 1', 'Senzaititolo', and 'Mondo'. The Windows taskbar at the bottom shows the system clock as 09:18 on 11/08/2016.

Triangoli correnti: 1.121.952  
Triangoli selezionati: 0

Pulsante centrale: Ruota | Maiusc+Pulsante destro: Zoom | Alt+Pulsante centrale: Panoramica

Finestra di dialogo

Registrazione globale

OK Annulla Applica

Operazioni

Controllo

Tolleranza: 0.0 mm  
Max Iterazioni: 100  
Dimensione campione: 2000

Aggiorna visualizzazione  
 Colori oggetto  
 Controllo slittamento  
 Limita traslazione  
Traslazione max: 0.0 mm

Vincoli feature

Riduzione sovrapposizione

Esegui Ristabilisci

Statistiche

Iterazioni: 37  
Distanza media: 0.000006 mm  
Deviazione standard: 0.000005 mm  
Coppia di deviazione massima:  
Senzaititolo  
Imetric 1

Arrestato: Rilevata convergenza

Gestione modelli

- Imetric 1
- Senzaititolo
- Mondo

09:18  
11/08/2016

# Test n° 5

The screenshot displays the Geomagic Studio 12 interface. The main window shows a 3D model of a dental arch, rendered in a green and yellow color scheme. The software's menu bar includes options like Vista, Selezione, Strumenti, Allineamento, Feature, Curve, Superfici esatte, Superfici parametriche, and Poligoni. Below the menu bar is a toolbar with various registration and alignment tools. The main workspace is titled 'Grafici' and 'Introduzione'. In the bottom-left corner, the following statistics are displayed: 'Triangoli correnti: 1.121.952' and 'Triangoli selezionati: 0'. At the bottom of the window, a status bar provides navigation instructions: 'Pulsante centrale: Ruota | Maiusc+Pulsante destro: Zoom | Alt+Pulsante centrale: Panoramica'. On the right side, two dialog boxes are open. The 'Finestra di dialogo' (Registration dialog) is titled 'Registrazione globale' and contains the following settings: 'Operazioni' (with icons for global and feature-based registration), 'Controllo' (Tolleranza: 0.0 mm, Max Iterazioni: 100, Dimensione campione: 2000, Aggiorna visualizzazione checked, Colori oggetto checked, Controllo slittamento checked, Limita traslazione unchecked, Traslazione max: 0.0 mm), 'Vincoli feature' (dropdown menu), 'Riduzione sovrapposizione' (Esegui, Ristabilisci buttons), and 'Statistiche' (Iterazioni: 34, Distanza media: 0.000002 mm, Deviazione standard: 0.000002 mm, Coppia di deviazione massima: Imetric 1, Senzaitolo). The 'Gestione modelli' (Model Management) dialog shows a list of models: 'Imetric 1', 'Senzaitolo', and 'Mondo'.



VALIDATION ERRORS IN THE PARTIALLY EDENTULOUS MODEL: RESULTS FROM THE 5 AFOREMENTIONED TESTS AND THE OVERALL MEAN AND SD

|         | Mean         | SD   |
|---------|--------------|------|
| Test 1  | 0 nm         | 0 nm |
| Test 2  | 6 nm         | 5 nm |
| Test 3  | 0 nm         | 0 nm |
| Test 4  | 6 nm         | 5 nm |
| Test 5  | 2 nm         | 2 nm |
| Overall | 2.8 (3.0) nm |      |

The same procedure was performed with 5 validation test for the fully edentulous model.

# Test n° 1 TOTALLY EDENTULOUS MODEL

The screenshot displays the Geomagic Studio 12 interface for a dental arch model. The main 3D view shows a yellow arch with several registration markers. The software's menu bar includes options like Vista, Selezione, Strumenti, Allineamento, Feature, Curve, Superfici esatte, Superfici parametriche, and Poligoni. The toolbar contains various registration tools such as 'Registrazione manuale', 'Registrazione globale', 'Rileva target sfera', 'Registrazione target', 'Ripulitura target', 'Allineamento ottimizzato', 'Allineamento RPS', 'Allineamento basato sulla feature', and 'Allinea al mondo'. The 'Finestra di dialogo' (Global Registration) window is open, showing settings for 'Registrazione globale' with buttons for OK, Annulla, and Applica. It includes sections for 'Operazioni', 'Controllo' (with fields for Tolleranza: 0.0 mm, Max Iterazioni: 100, and Dimensione campione: 2000), 'Vincoli feature', 'Riduzione sovrapposizione', and 'Statistiche' (showing Iterazioni: 27, Distanza media: 0.000004 mm, Deviazione standard: 0.000003 mm, and Coppia di deviazione massima: IMETRIC 1 senza titolo). The 'Gestione modelli' window shows a list of models: IMETRIC 1, senza titolo, and Mondo. The status bar at the bottom indicates 'Pulsante centrale: Ruota | Maiusc+Pulsante destro: Zoom | Alt+Pulsante centrale: Panoramica'.

Triangoli correnti: 1.073.596  
Triangoli selezionati: 0

Pulsante centrale: Ruota | Maiusc+Pulsante destro: Zoom | Alt+Pulsante centrale: Panoramica

# Test n° 2

The screenshot displays the Geomagic Studio 12 interface. The main window shows a 3D model of a curved, arch-like part with several hexagonal features, rendered in a green and yellow point cloud. The software's menu bar includes options like Vista, Selezione, Strumenti, Allineamento, Feature, Curve, Superfici esatte, Superfici parametriche, and Poligoni. Below the menu bar is a toolbar with various registration and alignment tools.

The **Finestra di dialogo** (Dialog Window) is open, showing the **Registrazione globale** (Global Registration) settings. The window includes buttons for OK, Annulla, and Applica. The **Operazioni** section shows two registration icons. The **Controllo** section includes the following parameters:

- Tolleranza: 0.0 mm
- Max Iterazioni: 100
- Dimensione campione: 2000
- Aggiorna visualizzazione
- Colori oggetto
- Controllo slittamento
- Limita traslazione
- Traslazione max: 0.0 mm

The **Vincoli feature** section is currently collapsed. The **Riduzione sovrapposizione** section includes buttons for Esegui and Ristabilisci. The **Statistiche** section displays the following data:

- Iterazioni: 11
- Distanza media: 0.000000 mm
- Deviazione standard: 0.000000 mm
- Coppia di deviazione massima: IMETRIC 1 senza titolo
- Arrestato: Rilevata convergenza

At the bottom left of the main window, the following statistics are shown:

- Triangoli correnti: 1.073.596
- Triangoli selezionati: 0

The bottom status bar provides navigation instructions: Pulsante centrale: Ruota | Maiusc+Pulsante destro: Zoom | Alt+Pulsante centrale: Panoramica.

# Test n° 3

The screenshot displays the Geomagic Studio 12 interface. The main window shows a 3D model of a green arch-shaped part with several circular features. The software's menu bar includes options like Vista, Selezione, Strumenti, Allineamento, Feature, Curve, Superfici esatte, Superfici parametriche, and Poligoni. The toolbar contains various registration and alignment tools. A dialog box titled "Finestra di dialogo" is open, showing the "Registrazione globale" settings. The "Controllo" section includes fields for Tolleranza (0.0 mm), Max Iterazioni (100), and Dimensione campione (2000). The "Statistiche" section shows 18 iterations, a mean distance of 0.000004 mm, and a standard deviation of 0.000003 mm. A "Gestione modelli" panel on the right shows the current model hierarchy: IMETRIC 1, senza titolo, and Mondo.

Triangoli correnti: 1.073.596  
Triangoli selezionati: 0

Pulsante centrale: Ruota | Maiusc+Pulsante destro: Zoom | Alt+Pulsante centrale: Panoramica

# Test n° 4

Geomagic Studio 12 -- IMETRIC 1.ctb

Vista Selezione Strumenti Allineamento Feature Curve Superfici esatte Superfici parametriche Poligoni

Registrazione manuale Registrazione globale Rileva target sfera Registrazione target Ripulitura target

Analizza registrazione

Allineamento ottimizzato Allineamento RPS Allineamento basato sulla feature Allinea al mondo

Allineamento oggetto

Grafici Introduzione

Triangoli correnti: 1 073 596  
Triangoli selezionati: 0

Pulsante centrale: Ruota | Maiusc+Pulsante destro: Zoom | Alt+Pulsante centrale: Panoramica

Finestra di dialogo

Registrazione globale

OK Annulla Applica

Operazioni

Controllo

Tolleranza: 0.0 mm

Max Iterazioni: 100

Dimensione campione: 2000

Aggiorna visualizzazione

Colori oggetto

Controllo slittamento

Limita traslazione

Traslazione max: 0.0 mm

Vincoli feature

Riduzione sovrapposizione

Esegui Ristabilisci

Statistiche

Iterazioni: 36

Distanza media: 0.000004 mm

Deviazione standard: 0.000003 mm

Coppia di deviazione massima:  
senza titolo

IMETRIC 1

Gestione modelli

- IMETRIC 1
  - senza titolo
  - Mondo

09:46  
11/08/2016

# Test n° 5

The screenshot displays the Geomagic Studio 12 interface with the following components:

- Toolbar:** Includes icons for registration (manuale, globale, sfera, target), alignment (ottimizzato, RPS, sulla feature, al mondo), and analysis (registrazione).
- Menu Bar:** Contains options for Vista, Selezione, Strumenti, Allineamento, Feature, Curve, Superfici esatte, Superfici parametriche, and Poligoni.
- Main View:** Shows a green 3D point cloud of an arch-like object with several circular features.
- Dialog Box (Finestra di dialogo):**
  - Registrazione globale:** OK, Annulla, Applica buttons.
  - Operazioni:** Two registration icons.
  - Controllo:** Tolleranza: 0.0 mm, Max Iterazioni: 100, Dimensione campione: 2000. Checkmarks for Aggiorna visualizzazione, Colori oggetto, and Controllo slittamento. Unchecked box for Limita traslazione (Traslazione max: 0.0 mm).
  - Vincoli feature:** Dropdown menu.
  - Riduzione sovrapposizione:** Esegui, Ristabilisci buttons.
  - Statistiche:** Iterazioni: 16, Distanza media: 0.000004 mm, Deviazione standard: 0.000003 mm, Coppia di deviazione massima: senza titolo, IMETRIC 1. Arrestato: Rilevata convergenza.
- Model Management (Gestione modelli):** Shows a tree view with "IMETRIC 1" (expanded) and "Mondo".
- Status Bar:** Pulsante centrale: Ruota | Maiusc+Pulsante destro: Zoom | Alt+Pulsante centrale: Panoramica

VALIDATION ERRORS IN THE TOTALLY EDENTULOUS MODEL: RESULTS FROM THE 5 AFOREMENTIONED TESTS AND THE OVERALL MEAN AND SD

|         | Mean         | Ds   |
|---------|--------------|------|
| Test 1  | 4 nm         | 3 nm |
| Test 2  | 0 nm         | 0 nm |
| Test 3  | 4 nm         | 3 nm |
| Test 4  | 4 nm         | 3 nm |
| Test 5  | 4 nm         | 3 nm |
| Overall | 3.2 (1.7) nm |      |



GENERAL TRUENESS EVALUATIONS FOR TRIOS, ZFX INTRASCAN, CARESTREAM, PLANSCAN (SCANS WERE RANDOM BUT HERE WE ORDERED THEM) IN THE PARTIALLY EDENTULOUS MODEL

GENERAL SETTINGS FOR FINAL REGISTRATION (TRUENESS):

0.5 mm, 0.05 mm, -0.05 mm, -0.5 mm (see scale)

# TRIOS 1 vs REF IMETRIC

**Finestra di dialogo**

**Registrazione globale**

OK Annulla Applica

**Operazioni:**

**Visualizzazione**

Tutti gli oggetti  
 Oggetto singolo

Trios 1  
Densità: Media

**Spettro**

Registrazione

Segmenti colorati: 15

Critico max: 0.5 mm

Nominale max: 0.05 mm

Min nominale: -0.05 mm

Critico min: -0.5 mm

Posizioni decimali: 3

**Statistiche**

Distanza massima: 0.974820 mm  
Distanza media: 0.063046 mm  
Deviazione standard: 0.078453 mm

**Gestione modelli**

- Imetric 1 (3)
- Trios 1
- Mondo

Triangoli correnti: 817,385  
Triangoli selezionati: 0

Pulsante centrale: Ruota | Maiusc+Pulsante destro: Zoom | Alt+Pulsante centrale: Panoramica

# TRIOS 1 vs REF (IMETRIC)

The screenshot displays the Geomagic Studio 12 interface. The main 3D view shows a mechanical part with a color-coded registration overlay. A vertical color scale on the left indicates the distance between the two models, ranging from -0.500 mm (dark blue) to 0.500 mm (dark red). The registration is primarily green and yellow, indicating a good fit.

The software interface includes the following elements:

- Menu Bar:** Vista, Selezione, Strumenti, Allineamento, Feature, Curve, Superfici esatte, Superfici parametriche, Poligoni.
- Toolbar:** Registrazione manuale, Registrazione globale, Rileva target sfera, Registrazione target, Ripulitura target, Allineamento ottimizzato, Allineamento RPS, Allineamento basato sulla feature, Allinea al mondo.
- Finestra di dialogo (Registration Global):**
  - Buttons: OK, Annulla, Applica.
  - Operazioni: [Icons]
  - Visualizzazione:  Tutti gli oggetti,  Oggetto singolo. Navigation: <<, <, >, >>, 1/2.
  - Densità: Media. Button: Calcola.
  - Spettro: Registrazione. Segmenti colorati: 15. Critico max: 0.5 mm. Norminale max: 0.05 mm. Min nominale: -0.05 mm. Critico min: -0.5 mm. Posizioni decimali: 3.
  - Statistiche: Distanza massima: 0.974820 mm, Distanza media: 0.063046 mm, Deviazione standard: 0.078453 mm.
- Gestione modelli:** Imetric 1 (3), Trios 1, Mondo.

Bottom status bar: Pulsante centrale: Ruota | Maiusc+Pulsante destro: Zoom | Alt+Pulsante centrale: Panoramica

Triangoli corenti: 817.385  
Triangoli selezionati: 0

# TRIOS 2 vs REF (IMETRIC)

The screenshot displays the Geomagic Studio 12 interface for a dental arch model. The main 3D view shows a color-coded registration overlay on the dental arch, with a vertical color scale on the left ranging from -0.500 (dark blue) to 0.500 (dark red). The registration overlay shows areas of deviation between the two models, with green and yellow indicating smaller deviations and red indicating larger deviations.

The software interface includes a menu bar at the top with options: Vista, Selezione, Strumenti, Allineamento, Feature, Curve, Superfici esatte, Superfici parametriche, and Poligoni. Below the menu bar is a toolbar with various registration and alignment tools, including: Registrazione manuale, Registrazione globale, Rileva target sfera, Registrazione target, Ripulitura target, Allineamento ottimizzato, Allineamento RPS, Allineamento basato sulla feature, and Allinea al mondo.

On the right side, there are two dialog boxes. The top one is titled "Finestra di dialogo" and contains the "Registrazione globale" settings. The bottom one is titled "Gestione modelli" and shows a list of models: Imetric 3, Trios 2, and Mondo.

The "Registrazione globale" dialog box includes the following settings:

- Operazioni: [Icons]
- Visualizzazione:  Tutti gli oggetti,  Oggetto singolo
- Densità: Media
- Calcola
- Spettro:  Segmenti colorati
- Critico max: 0.5 mm
- Nominale max: 0.05 mm
- Min nominale: -0.05 mm
- Critico min: -0.5 mm
- Posizioni decimali: 3
- Statistiche: Distanza massima: 0.969187 mm, Distanza media: 0.097681 mm, Deviazione standard: 0.097279 mm

At the bottom left, the following information is displayed:

Triangoli coreniti: 819.094  
Triangoli selezionati: 0

At the bottom of the window, the following keyboard shortcuts are listed:

Pulsante centrale: Ruota | Maiusc+Pulsante destro: Zoom | Alt+Pulsante centrale: Panoramica

# TRIOS 2 vs REF (IMETRIC)

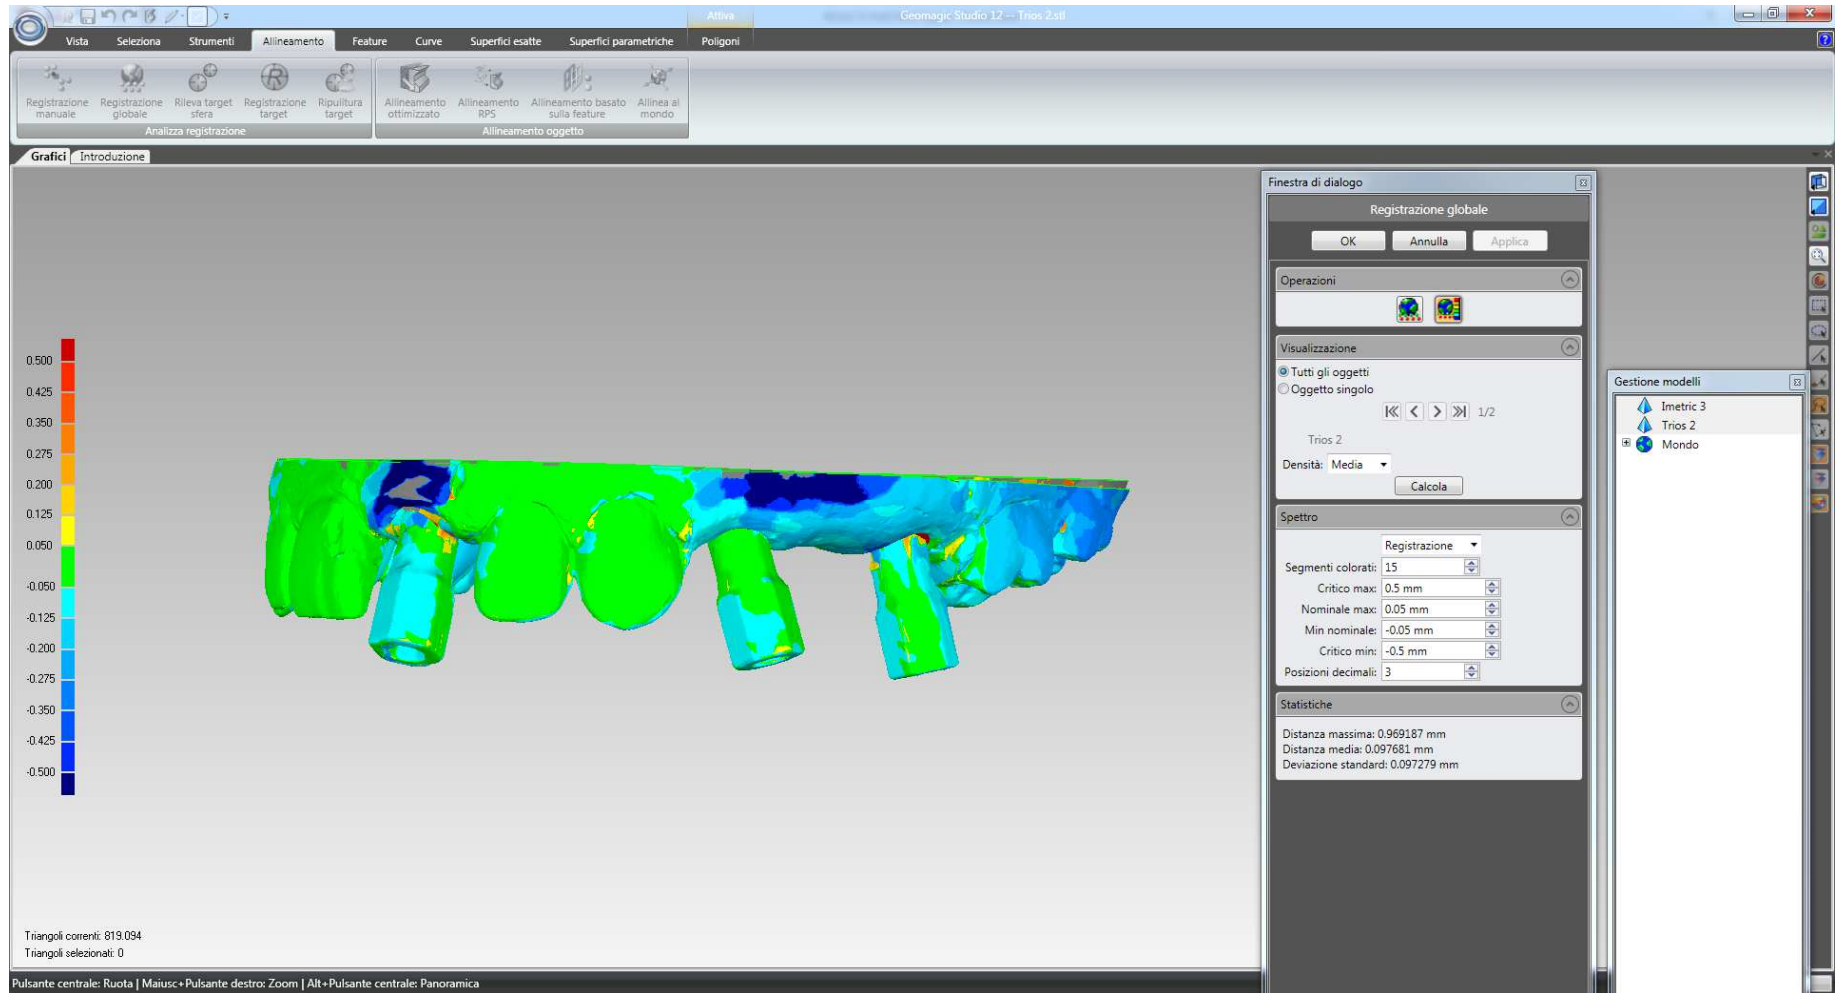

# TRIOS 3 vs REF (IMETRIC)

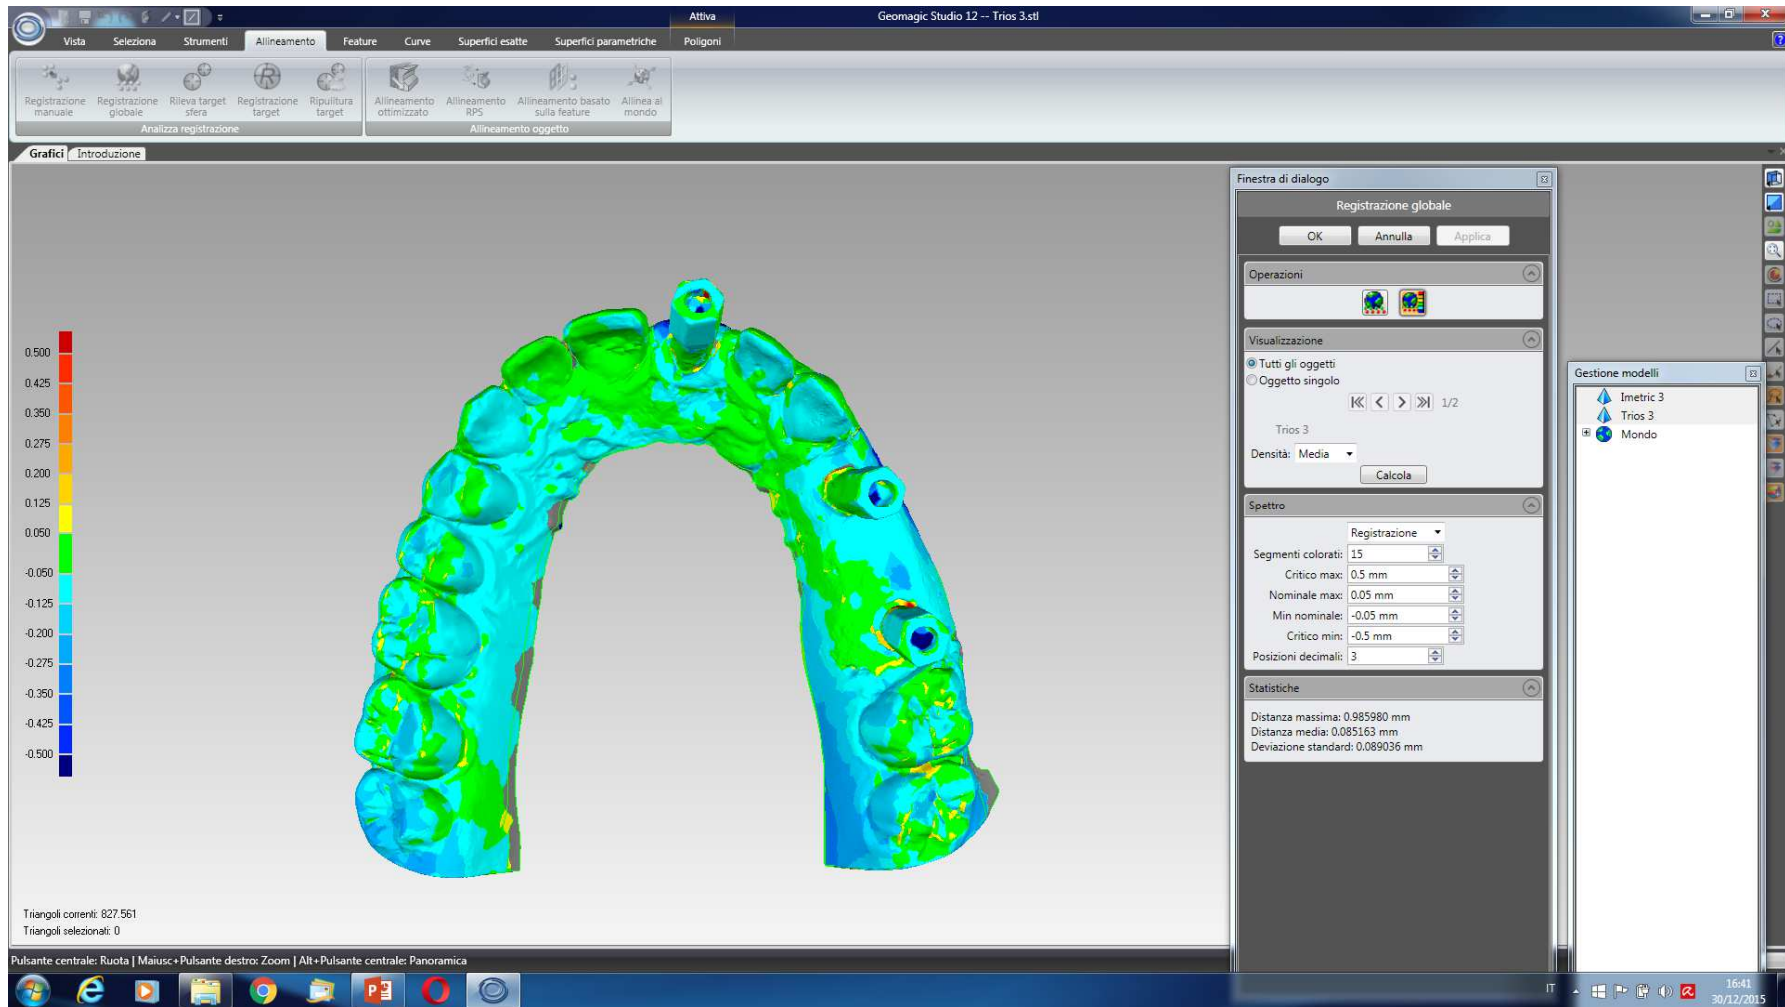

# TRIOS 3 vs REF (IMETRIC)

The screenshot displays the Geomagic Studio 12 interface. The main window shows a 3D model of a hand with a color-coded registration map. The color scale ranges from -0.500 (dark blue) to 0.500 (dark red), with intermediate values at -0.425, -0.350, -0.275, -0.200, -0.125, -0.050, 0.050, 0.125, 0.200, 0.275, 0.350, and 0.425. The registration map shows the alignment of the Trios 3 scan (green) with the reference model (blue). The registration is performed on the hand and two cylindrical objects. The registration quality is indicated by the color scale, with red indicating the highest deviation and blue indicating the lowest.

The interface includes a menu bar with options: Vista, Selezione, Strumenti, Allineamento, Feature, Curve, Superfici esatte, Superfici parametriche, and Poligoni. The toolbar contains various registration and alignment tools. The main 3D view shows the registration map. The right side of the interface features several dialog boxes:

- Finestra di dialogo**:
  - Registrazione globale**: OK, Annulla, Applica
  - Operazioni**: [Icons]
  - Visualizzazione**:
    - Tutti gli oggetti
    - Oggetto singolo
    - Navigation icons: [Home], [Left], [Right], [Home]
    - Page indicator: 1/2
    - Model: Trios 3
    - Densità: Media
    - Calcola
  - Spettro**:
    - Registrazione
    - Segmenti colorati: 15
    - Critico max: 0.5 mm
    - Nominale max: 0.05 mm
    - Min nominale: -0.05 mm
    - Critico min: -0.5 mm
    - Posizioni decimali: 3
  - Statistiche**:
    - Distanza massima: 0.985980 mm
    - Distanza media: 0.085163 mm
    - Deviazione standard: 0.089036 mm
- Gestione modelli**:
  - Imetric 3
  - Trios 3
  - Mondo

At the bottom left, the following statistics are displayed:

- Triangoli correnti: 827.561
- Triangoli selezionati: 0

At the bottom of the window, the following keyboard shortcuts are listed:

- Pulsante centrale: Ruota | Maiusc+Pulsante destro: Zoom | Alt+Pulsante centrale: Panoramica

# TRIOS 4 vs REF (IMETRIC)

The screenshot displays the Geomagic Studio 12 interface for a dental arch model. The main 3D view shows a color-coded registration overlay on the dental arch, with a color scale on the left ranging from -0.500 (blue) to 0.500 (red). The registration is primarily green and yellow, indicating a good fit. The software interface includes a menu bar (Vista, Selezione, Strumenti, Allineamento, Feature, Curve, Superfici esatte, Superfici parametriche, Poligoni) and a toolbar with various registration and alignment tools. On the right side, there are three dialog boxes: 'Finestra di dialogo' (Registration global), 'Gestione modelli' (Model management), and 'Statistiche' (Statistics). The 'Finestra di dialogo' shows 'Registrazione globale' with 'OK', 'Annulla', and 'Applica' buttons. The 'Gestione modelli' shows a list of models: 'Imetric 3', 'Trios 4', and 'Mondo'. The 'Statistiche' dialog box displays the following data:

| Statistiche          |             |
|----------------------|-------------|
| Distanza massima:    | 1.002080 mm |
| Distanza media:      | 0.063192 mm |
| Deviazione standard: | 0.077653 mm |

At the bottom left, the status bar shows: 'Triangoli correnti: 817.836' and 'Triangoli selezionati: 0'. The bottom of the window contains keyboard shortcuts: 'Pulsante centrale: Ruota | Maiusc+Pulsante destro: Zoom | Alt+Pulsante centrale: Panoramica'.



# TRIOS 4 vs REF (IMETRIC)

The screenshot displays the Geomagic Studio 12 interface. The main 3D view shows a dental arch model with a color-coded deviation map. A vertical color scale on the left indicates deviation values from -0.500 mm (dark blue) to 0.500 mm (dark red). The model is primarily green and yellow, indicating deviations within the nominal range.

The interface includes a menu bar with options: Vista, Selezione, Strumenti, Allineamento, Feature, Curve, Superfici esatte, Superfici parametriche, and Poligoni. Below the menu bar is a toolbar with icons for registration and alignment operations.

On the right side, there are three dialog boxes:

- Finestra di dialogo**: Contains settings for global registration, visualization, and statistics.
- Registrazione globale**: Includes buttons for OK, Annulla, and Applica.
- Operazioni**: Shows icons for registration and alignment.
- Visualizzazione**: Includes options for visualization (Tutti gli oggetti, Oggetto singolo), navigation (1/2), and density (Media).
- Spettro**: Includes a dropdown for 'Registrazione', and fields for Segmenti colorati (15), Critico max (0.5 mm), Nominale max (0.05 mm), Min nominale (-0.05 mm), Critico min (-0.5 mm), and Posizioni decimali (3).
- Statistiche**: Displays registration statistics: Distanza massima: 1.002080 mm, Distanza media: 0.063192 mm, Deviazione standard: 0.077653 mm.
- Gestione modelli**: Lists models: Imetric 3, Trios 4, and Mondo.

At the bottom left, the status bar shows: Triangoli correnti: 817.836, Triangoli selezionati: 0. At the bottom center, the status bar shows: Pulsante centrale: Ruota | Maiusc+Pulsante destro: Zoom | Alt+Pulsante centrale: Panoramica.

# TRIOS 5 vs REF (IMETRIC)

The screenshot displays a CAD software interface with a 3D model of a dental arch. The model is color-coded, with a vertical legend on the left showing a scale from -0.500 (blue) to 0.500 (red). The software interface includes a menu bar with options like 'Vista', 'Selezione', 'Strumenti', 'Allineamento', 'Feature', 'Curve', 'Superfici esatte', 'Superfici parametriche', and 'Poligoni'. A toolbar below the menu bar contains various registration and alignment tools. A dialog box titled 'Finestra di dialogo' is open on the right, showing 'Registrazione globale' settings. The dialog box includes sections for 'Operazioni', 'Visualizzazione', 'Spettro', and 'Statistiche'. The 'Spettro' section shows 'Registrazione' selected, with 'Segmenti colorati' set to 15, and 'Critico max' at 0.5 mm, 'Nominale max' at 0.05 mm, 'Min nominale' at -0.05 mm, and 'Critico min' at -0.5 mm. The 'Statistiche' section shows 'Distanza massima: 0.976612 mm', 'Distanza media: 0.048344 mm', and 'Deviazione standard: 0.081781 mm'. The bottom status bar indicates 'Triangoli correnti: 850.310' and 'Triangoli selezionati: 0'. The Windows taskbar at the bottom shows the date and time as 16:57 on 30/12/2015.

Finestra di dialogo

Registrazione globale

OK Annulla Applica

Operazioni

Visualizzazione

Tutti gli oggetti  
 Oggetto singolo

Trios 5

Densità: Media

Calcola

Spettro

Registrazione

Segmenti colorati: 15

Critico max: 0.5 mm

Nominale max: 0.05 mm

Min nominale: -0.05 mm

Critico min: -0.5 mm

Posizioni decimali: 3

Statistiche

Distanza massima: 0.976612 mm  
Distanza media: 0.048344 mm  
Deviazione standard: 0.081781 mm

Triangoli correnti: 850.310  
Triangoli selezionati: 0

Pulsante centrale: Ruota | Maiusc+Pulsante destro: Zoom | Alt+Pulsante centrale: Panoramica

16:57  
30/12/2015

# TRIOS 5 vs REF (IMETRIC)

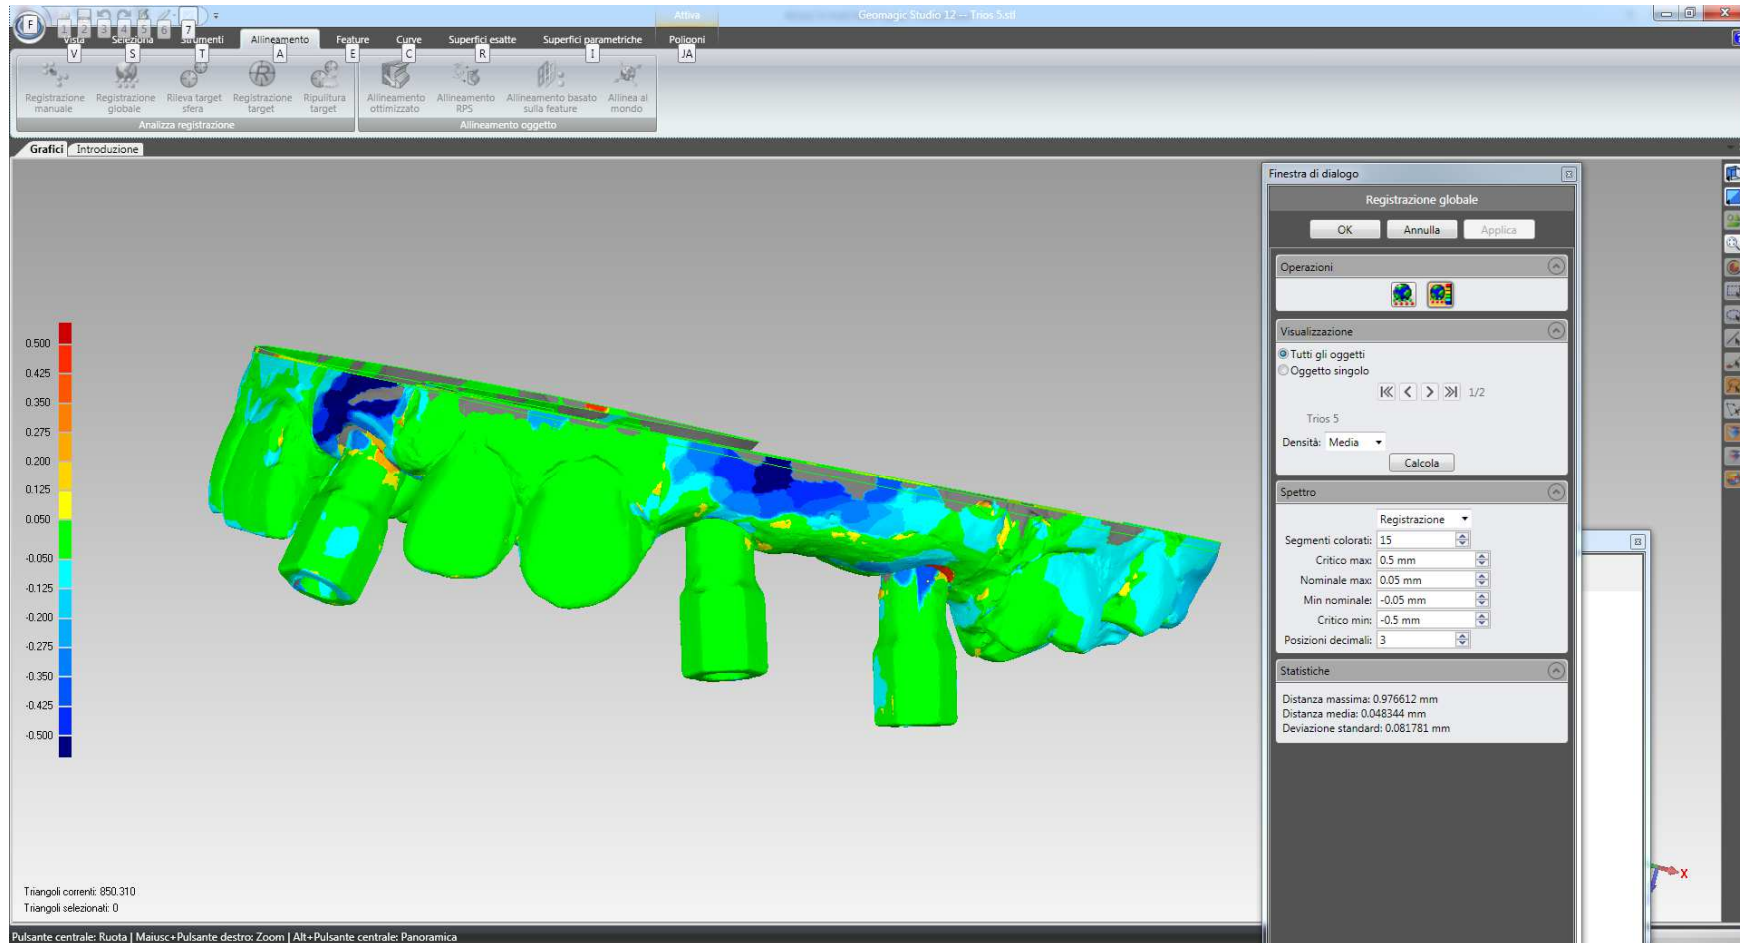

General trueness values, TRIOS in the partially edentulous model

|         | Mean distance | SD    | Maximum distance |
|---------|---------------|-------|------------------|
| Trios 1 | 0.063         | 0.078 | 0.974            |
| Trios 2 | 0.097         | 0.097 | 0.969            |
| Trios 3 | 0.085         | 0.089 | 0.985            |
| Trios 4 | 0.063         | 0.077 | 1.004            |
| Trios 5 | 0.048         | 0.081 | 0.976            |

**Overall Trios general TRUENESS: 0.071 (0.019)**

# ZFX 1 VS REF (IMETRIC)

The screenshot displays the Geomagic Studio 12 interface. The main window shows a 3D model of a dental arch with a color-coded deviation map. The color scale on the left ranges from -0.500 (dark blue) to 0.500 (dark red). The right side of the interface features a 'Finestra di dialogo' (Dialog Window) for 'Registrazione globale' (Global Registration). The dialog window includes the following sections:

- Registrazione globale:** OK, Annulla, Applica
- Operazioni:** [Icons]
- Visualizzazione:**  Tutti gli oggetti,  Oggetto singolo, Navigation buttons, Mht 1, Densità: Media, Calcola
- Spettro:** Registrazione, Segmenti colorati: 15, Critico max: 0.5 mm, Nominale max: 0.05 mm, Min nominale: -0.05 mm, Critico min: -0.5 mm, Posizioni decimali: 3
- Statistiche:** Distanza massima: 1.006640 mm, Distanza media: 0.138202 mm, Deviazione standard: 0.185450 mm

At the bottom left, the status bar shows: Triangoli correnti: 840.963, Triangoli selezionati: 0. At the bottom center, the navigation bar shows: Pulsante centrale: Ruota | Maiusc+Pulsante destro: Zoom | Alt+Pulsante centrale: Panoramica.

# ZFX 1 VS REF (IMETRIC)

The screenshot displays the Geomagic Studio 12 interface. The main 3D view shows a hand model with a color-coded deviation map. A vertical color scale on the left indicates deviation values from -0.500 to 0.500. The software interface includes a menu bar (Vista, Selezione, Strumenti, Allineamento, Feature, Curve, Superfici esatte, Superfici parametriche, Poligoni) and a toolbar with various registration and alignment tools. The 'Finestra di dialogo' (Dialog Box) is open, showing the following settings:

- Registrazione globale:** OK, Annulla, Applica
- Operazioni:** [Icons]
- Visualizzazione:** Tutti gli oggetti (selected), Oggetto singolo, Mnt 1, Densità: Media, Calcola
- Spettro:** Registrazione, Segmenti colorati: 15, Critico max: 0.5 mm, Nominale max: 0.05 mm, Min nominale: -0.05 mm, Critico min: -0.5 mm, Posizioni decimali: 3
- Statistiche:** Distanza massima: 1.006640 mm, Distanza media: 0.138202 mm, Deviazione standard: 0.185450 mm

At the bottom left, the status bar shows: Triangoli correnti: 840.963, Triangoli selezionati: 0. The Windows taskbar at the bottom indicates the time is 17:10 on 30/12/2015.

# ZFX 2 VS REF (IMETRIC)

**Finestra di dialogo**

**Registrazione globale**

OK Annulla Applica

Operazioni

Visualizzazione

Tutti gli oggetti  
 Oggetto singolo

1/2

Mht 2

Densità: Media

Calcola

Spettro

Registrazione

Segmenti colorati: 15

Critico max: 0.5 mm

Nominale max: 0.05 mm

Min nominale: -0.05 mm

Critico min: -0.5 mm

Posizioni decimali: 3

Statistiche

Distanza massima: 0.987970 mm  
Distanza media: 0.099586 mm  
Deviazione standard: 0.115306 mm

Triangoli correnti: 846.217  
Triangoli selezionati: 0

Pulsante centrale: Ruota | Miusc+Pulsante destro: Zoom | Alt+Pulsante centrale: Panoramica

IT 17:15 30/12/2015

# ZFX 2 VS REF (IMETRIC)

The screenshot displays the Geomagic Studio 12 interface. The main window shows a 3D model of a mechanical part with a color-coded registration map. The map uses a scale from -0.500 (blue) to 0.500 (red) to indicate registration error. A 'Finestra di dialogo' (dialog box) is open on the right, displaying registration statistics for 'Mht 2'.

**Finestra di dialogo: Registrazione globale**

OK Annulla Applica

Operazioni

Visualizzazione

Tutti gli oggetti  
 Oggetto singolo

Mht 2

Densità: Media

Calcola

Spettro

Registrazione

Segmenti colorati: 15

Critico max: 0.5 mm

Nominale max: 0.05 mm

Min nominale: -0.05 mm

Critico min: -0.5 mm

Posizioni decimali: 3

Statistiche

Distanza massima: 0.987970 mm  
Distanza media: 0.099586 mm  
Deviazione standard: 0.115306 mm

Triangoli conenti: 846.217  
Triangoli selezionati: 0

Pulsante centrale: Ruota | Maiusc+Pulsante destro: Zoom | Alt+Pulsante centrale: Panoramica



# ZFX 3 VS REF (IMETRIC)

The screenshot displays the Geomagic Studio 12 interface. The main workspace shows a 3D model of a dental arch with a color-coded deviation map. The color scale on the left ranges from -0.500 mm (dark blue) to 0.500 mm (dark red). The 'Finestra di dialogo' (Dialog Window) is open, showing the following settings:

- Registrazione globale:** OK, Annulla, Applica
- Operazioni:** [Icons]
- Visualizzazione:**  Tutti gli oggetti,  Oggetto singolo. Navigation buttons: <<, <, >, >>, 1/2. Object: Mht 3. Density: Media. [Calcola]
- Spettro:** Registrazione. Segmenti colorati: 15. Critico max: 0.5 mm. Nominale max: 0.05 mm. Min nominale: -0.05 mm. Critico min: -0.5 mm. Posizioni decimali: 3.
- Statistiche:** Distanza massima: 0.987747 mm. Distanza media: 0.143756 mm. Deviazione standard: 0.134811 mm.

At the bottom left, the status bar shows: Triangoli correnti: 834.406, Triangoli selezionati: 0. At the bottom center, the keyboard shortcuts are: Pulsante centrale: Ruota | Maiusc+Pulsante destro: Zoom | Alt+Pulsante centrale: Panoramica.

# ZFX 3 VS REF (IMETRIC)

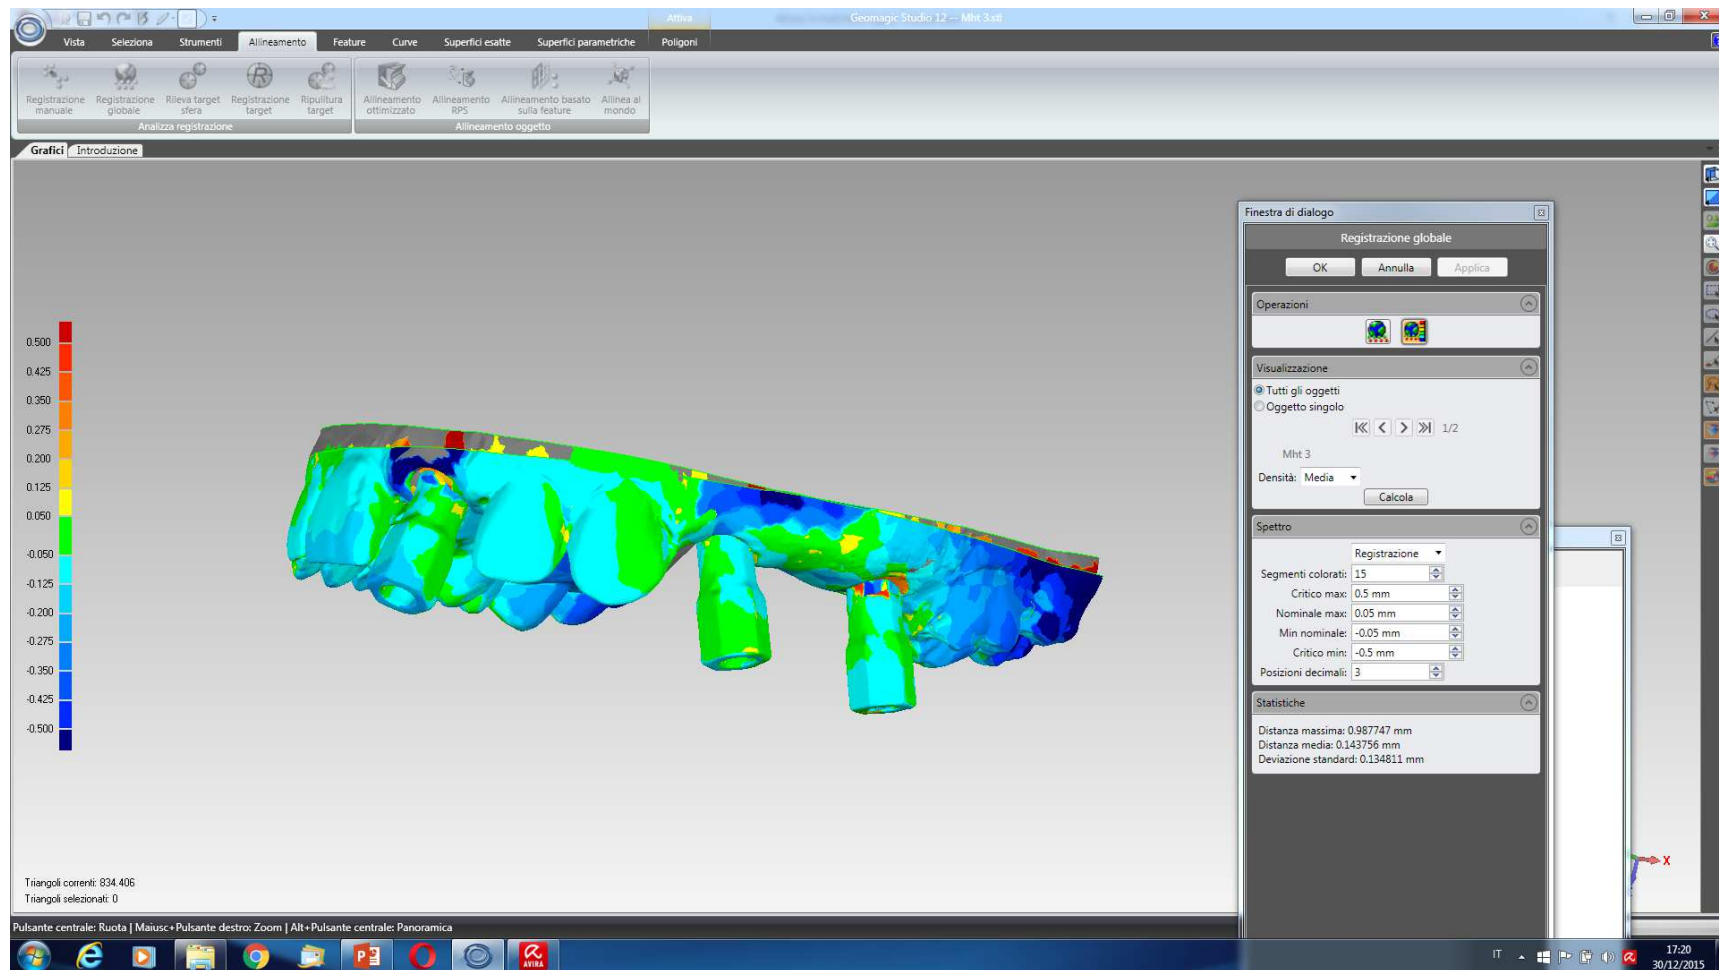

# ZFX 4 VS REF (IMETRIC)

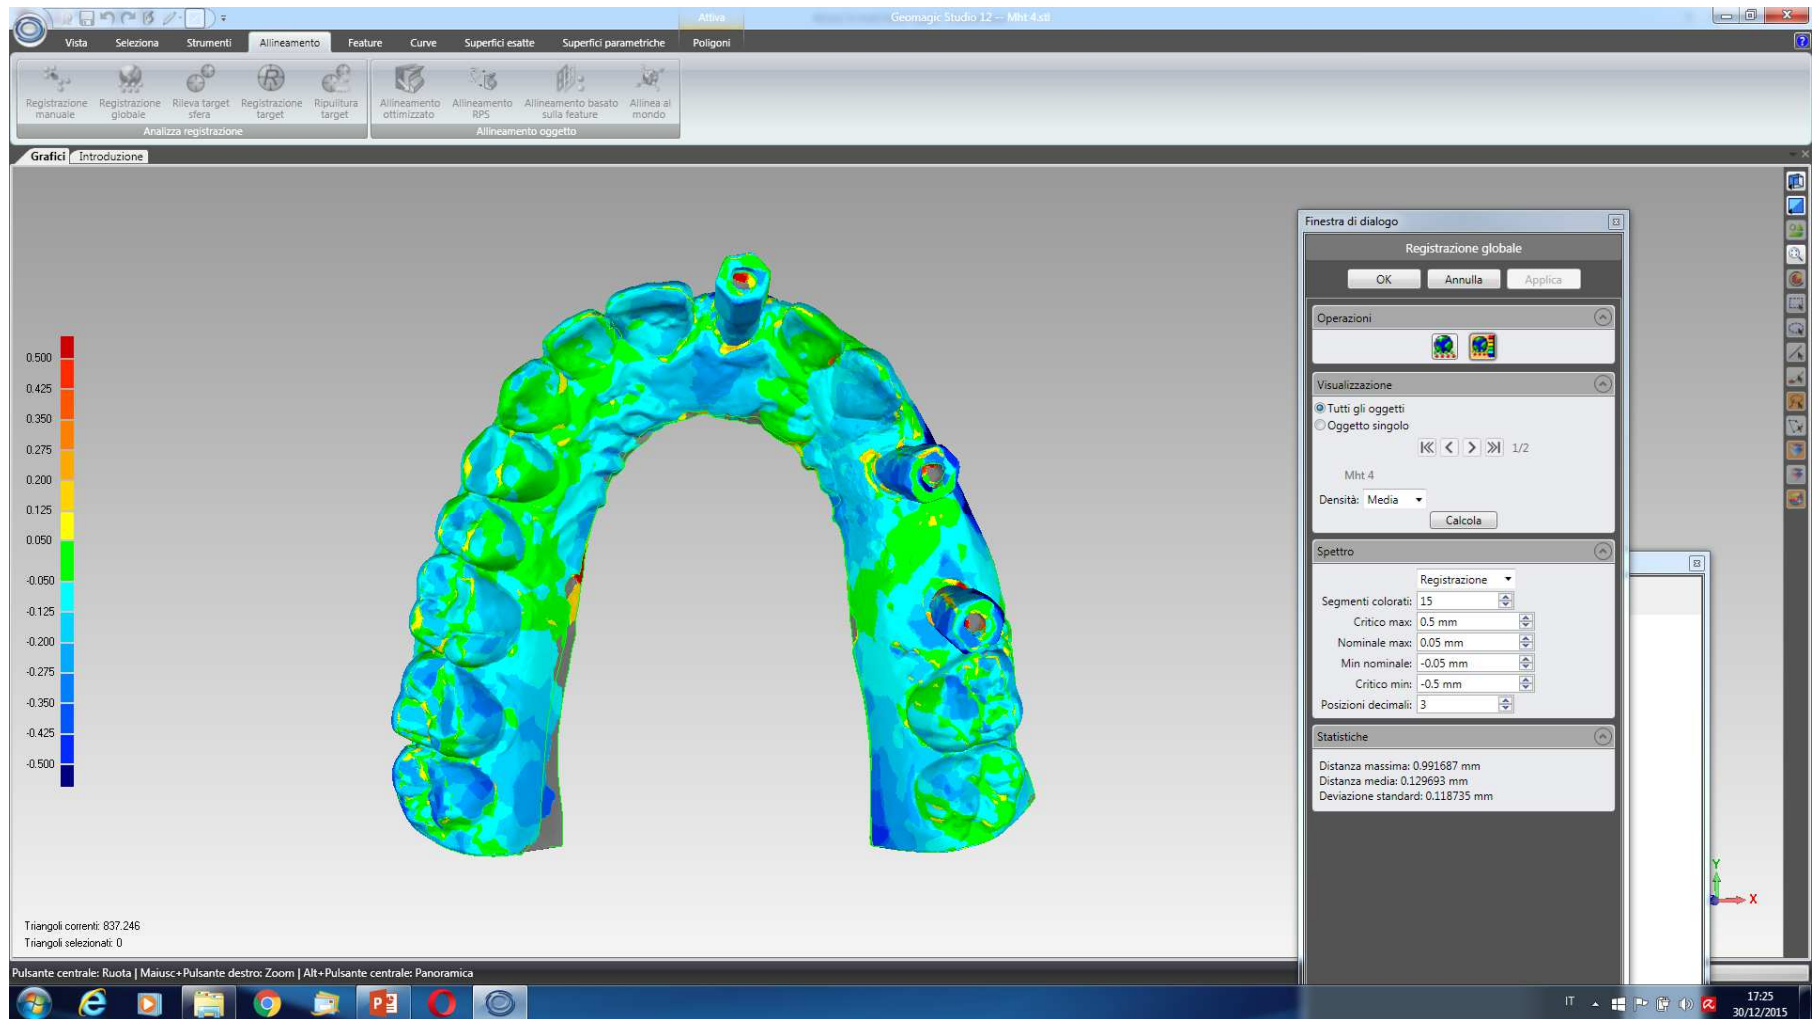

# ZFX 4 VS REF (IMETRIC)

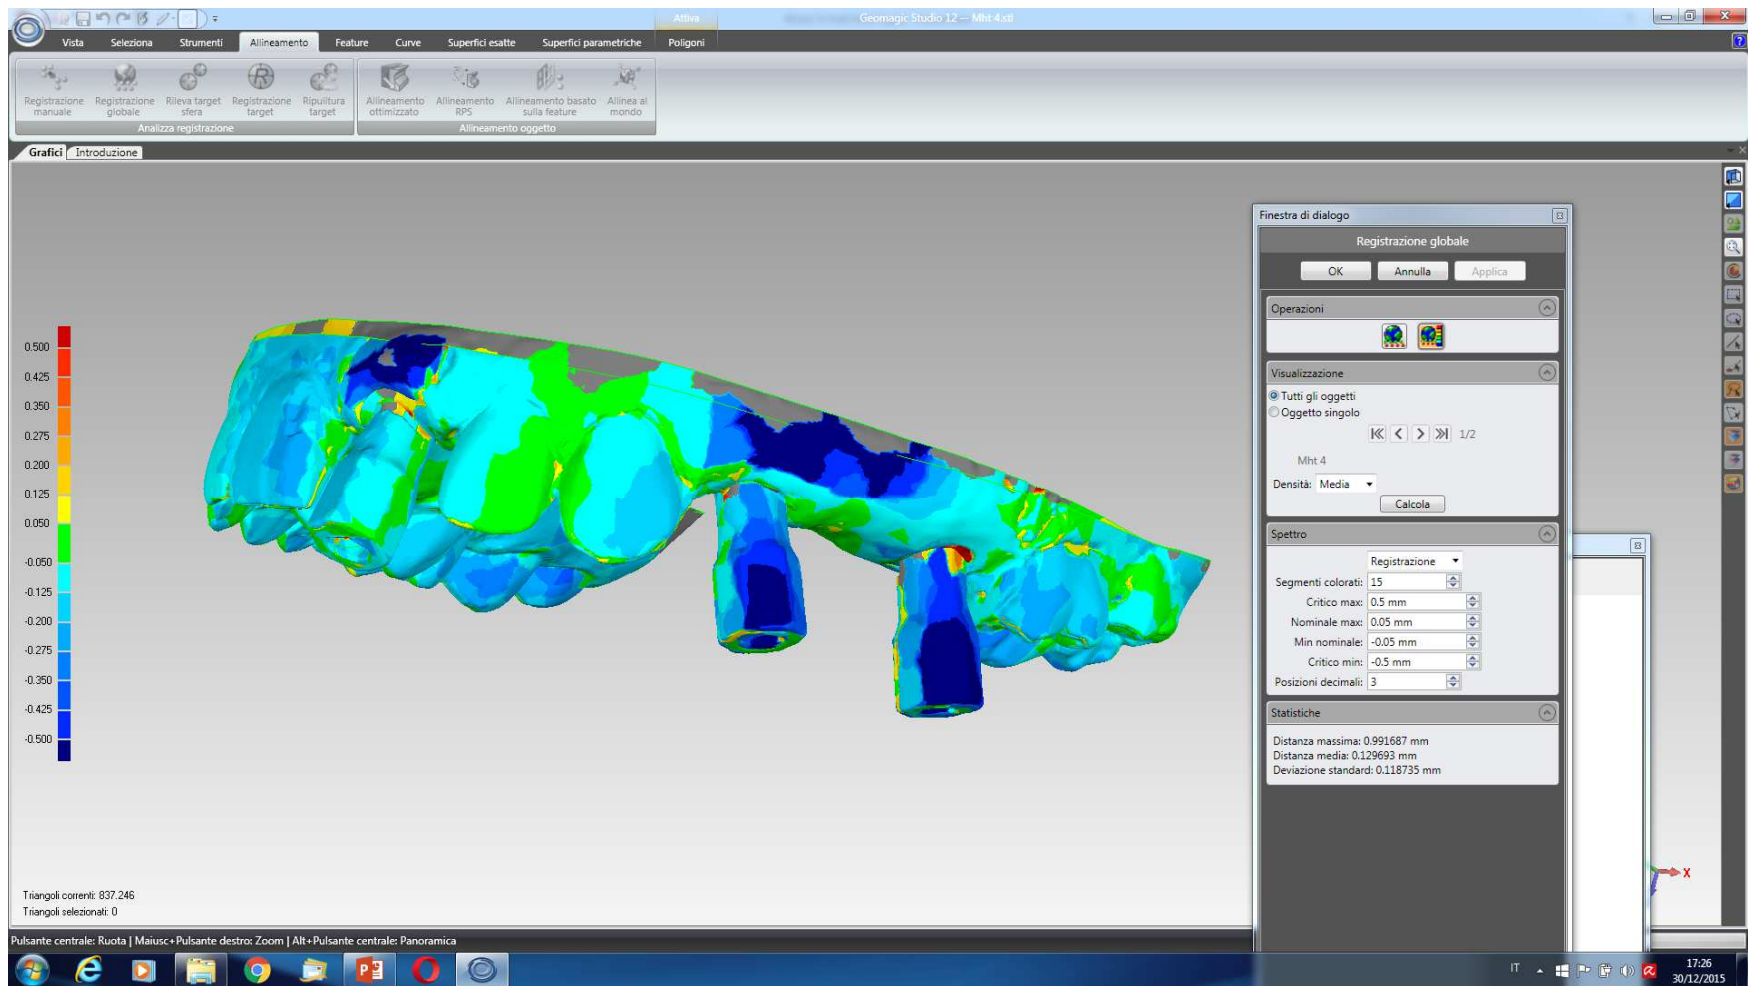

# ZFX 5 VS REF (IMETRIC)

Geomagic Studio 12 -- Mht.5.stl

Vista Selezione Strumenti **Allineamento** Feature Curve Superfici esatte Superfici parametriche Poligoni

Registrazione manuale Registrazione globale Rileva target sfera Registrazione target Ripulitura target Allineamento ottimizzato Allineamento RPS Allineamento basato sulla feature Allinea al mondo

Analizza registrazione Allineamento oggetto

Grafici Introduzione

0.500  
0.425  
0.350  
0.275  
0.200  
0.125  
0.050  
-0.050  
-0.125  
-0.200  
-0.275  
-0.350  
-0.425  
-0.500

Triangoli correnti: 831.513  
Triangoli selezionati: 0

Pulsante centrale: Ruota | Maiusc+Pulsante destro: Zoom | Alt+Pulsante centrale: Panoramica

Finestra di dialogo

Registrazione globale

OK Annulla Applica

Operazioni

Visualizzazione

Tutti gli oggetti  
 Oggetto singolo

1/2

Mht.5

Densità: Media

Calcola

Spettro

Registrazione

Segmenti colorati: 15

Critico max: 0.5 mm

Nominale max: 0.05 mm

Min nominale: -0.05 mm

Critico min: -0.5 mm

Posizioni decimali: 3

Statistiche

Distanza massima: 0.989898 mm  
Distanza media: 0.076970 mm  
Deviazione standard: 0.097206 mm

# ZFX 5 VS REF (IMETRIC)

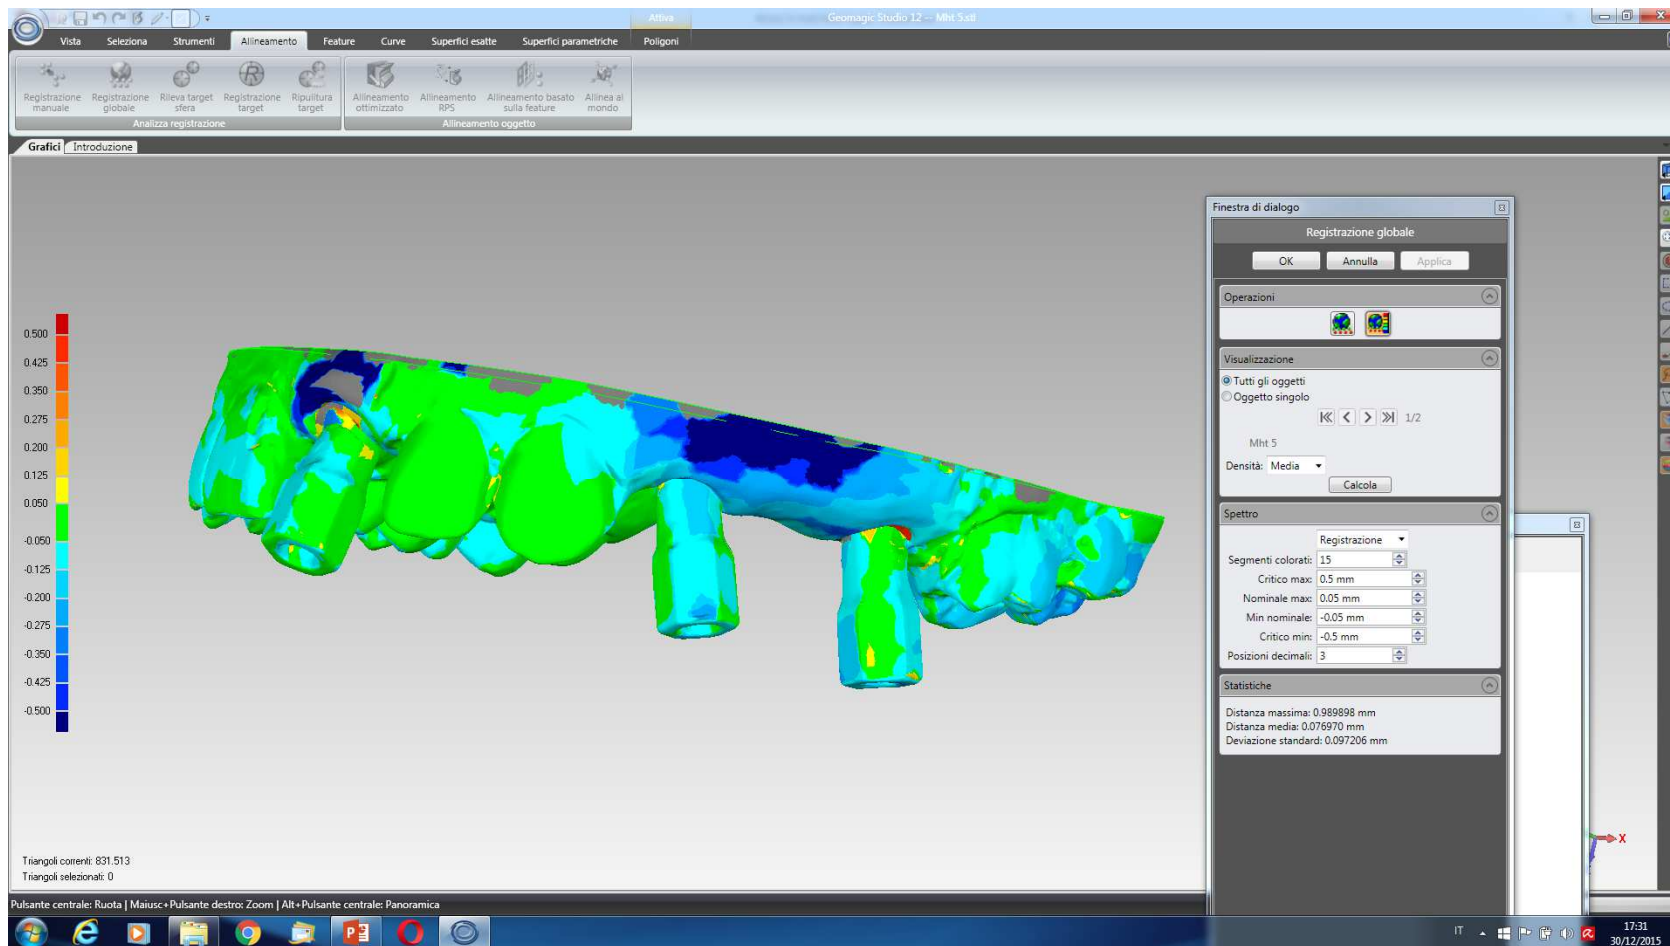

Overall general trueness with Zfx in the partially edentulous model

|       | Mean distance | SD    | Maximum distance |
|-------|---------------|-------|------------------|
| Zfx 1 | 0.138         | 0.185 | 1.006            |
| Zfx 2 | 0.099         | 0.115 | 0.987            |
| Zfx 3 | 0.143         | 0.134 | 0.987            |
| Zfx 4 | 0.129         | 0.118 | 0.991            |
| Zfx 5 | 0.076         | 0.097 | 0.989            |

**Overall Mht general trueness: 0.117 (0.028)**

# Care 1 vs REF (IMETRIC)

The screenshot shows a CAD software interface with a 3D model of a dental arch. The model is color-coded to show registration accuracy, with a color scale on the left ranging from -0.500 (dark blue) to 0.500 (dark red). The registration map shows a mix of green and cyan, indicating moderate accuracy. A dialog box titled 'Finestra di dialogo' is open on the right, showing registration statistics for 'Carestream 1'.

**Finestra di dialogo**  
Registrazione globale  
OK Annulla Applica

Operazioni: [Icone]

Visualizzazione  
 Tutti gli oggetti  
 Oggetto singolo  
Carestream 1  
Densità: Media [Calcola]

Spettro  
Registrazione [Dropdown]  
Segmenti colorati: 15  
Critico max: 0.5 mm  
Nominale max: 0.05 mm  
Min nominale: -0.05 mm  
Critico min: -0.5 mm  
Posizioni decimali: 3

Statistiche  
Distanza massima: 0.999560 mm  
Distanza media: 0.053444 mm  
Deviazione standard: 0.081107 mm

Triangoli correnti: 783.183  
Triangoli selezionati: 0

Pulsante centrale: Ruota | Maiusc+Pulsante destro: Zoom | Alt+Pulsante centrale: Panoramica

17:37  
30/12/2015



# Care 1 vs REF (IMETRIC)

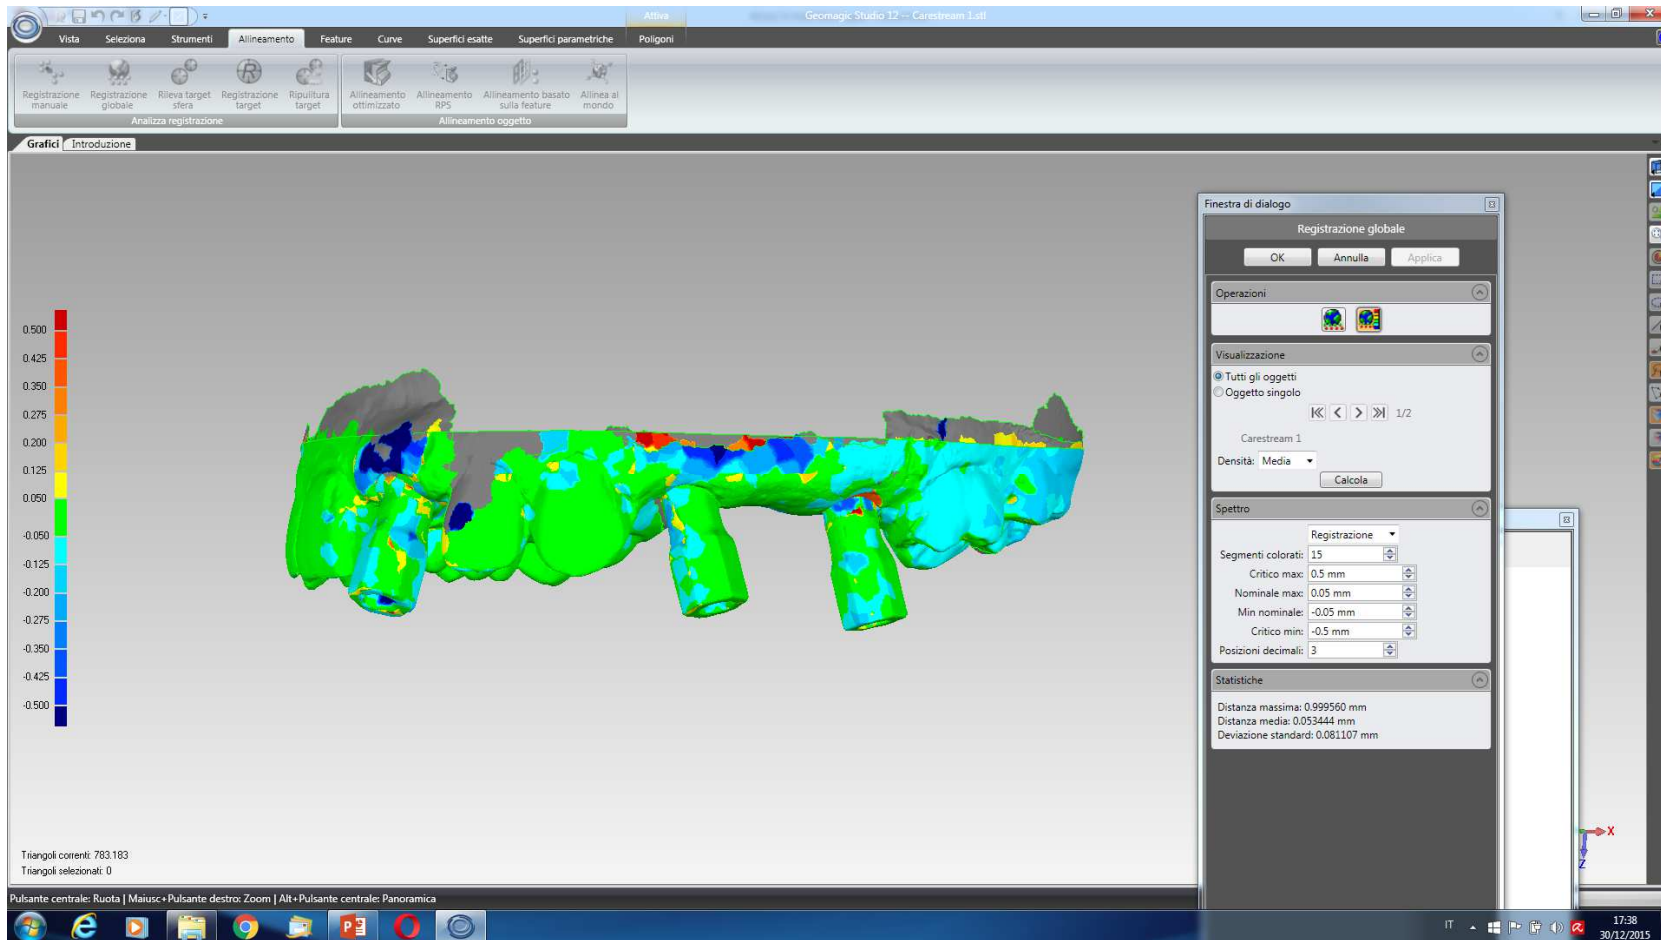

# Care 2 vs REF (IMETRIC)

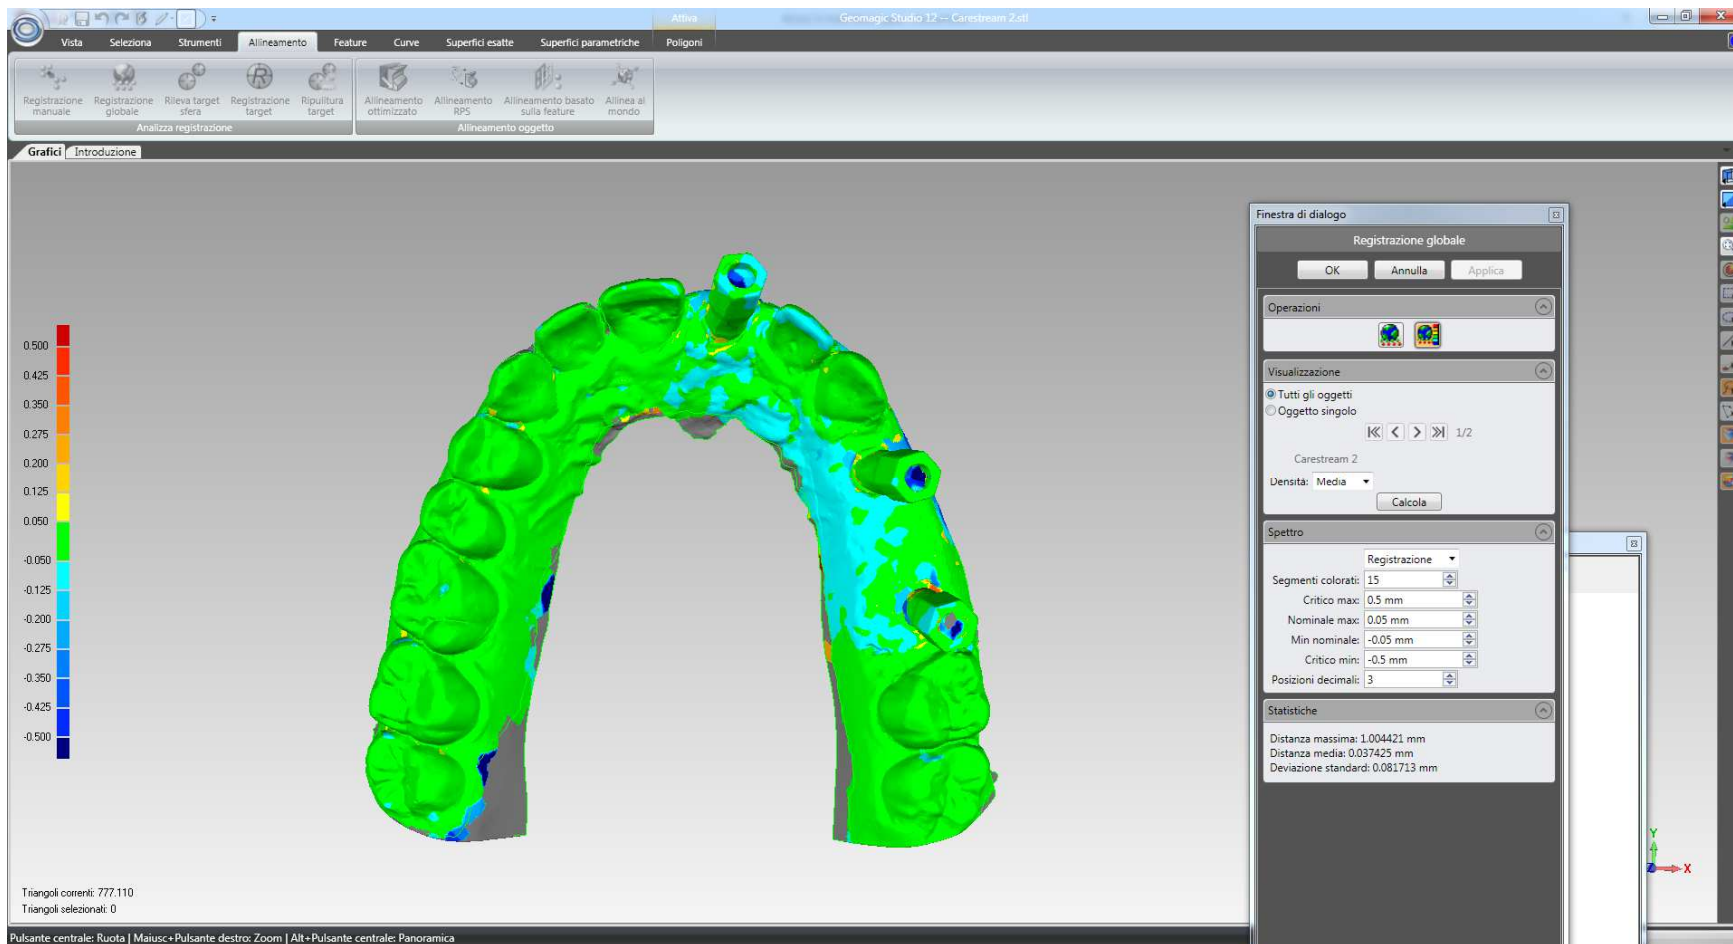

# Care 2 vs REF (IMETRIC)

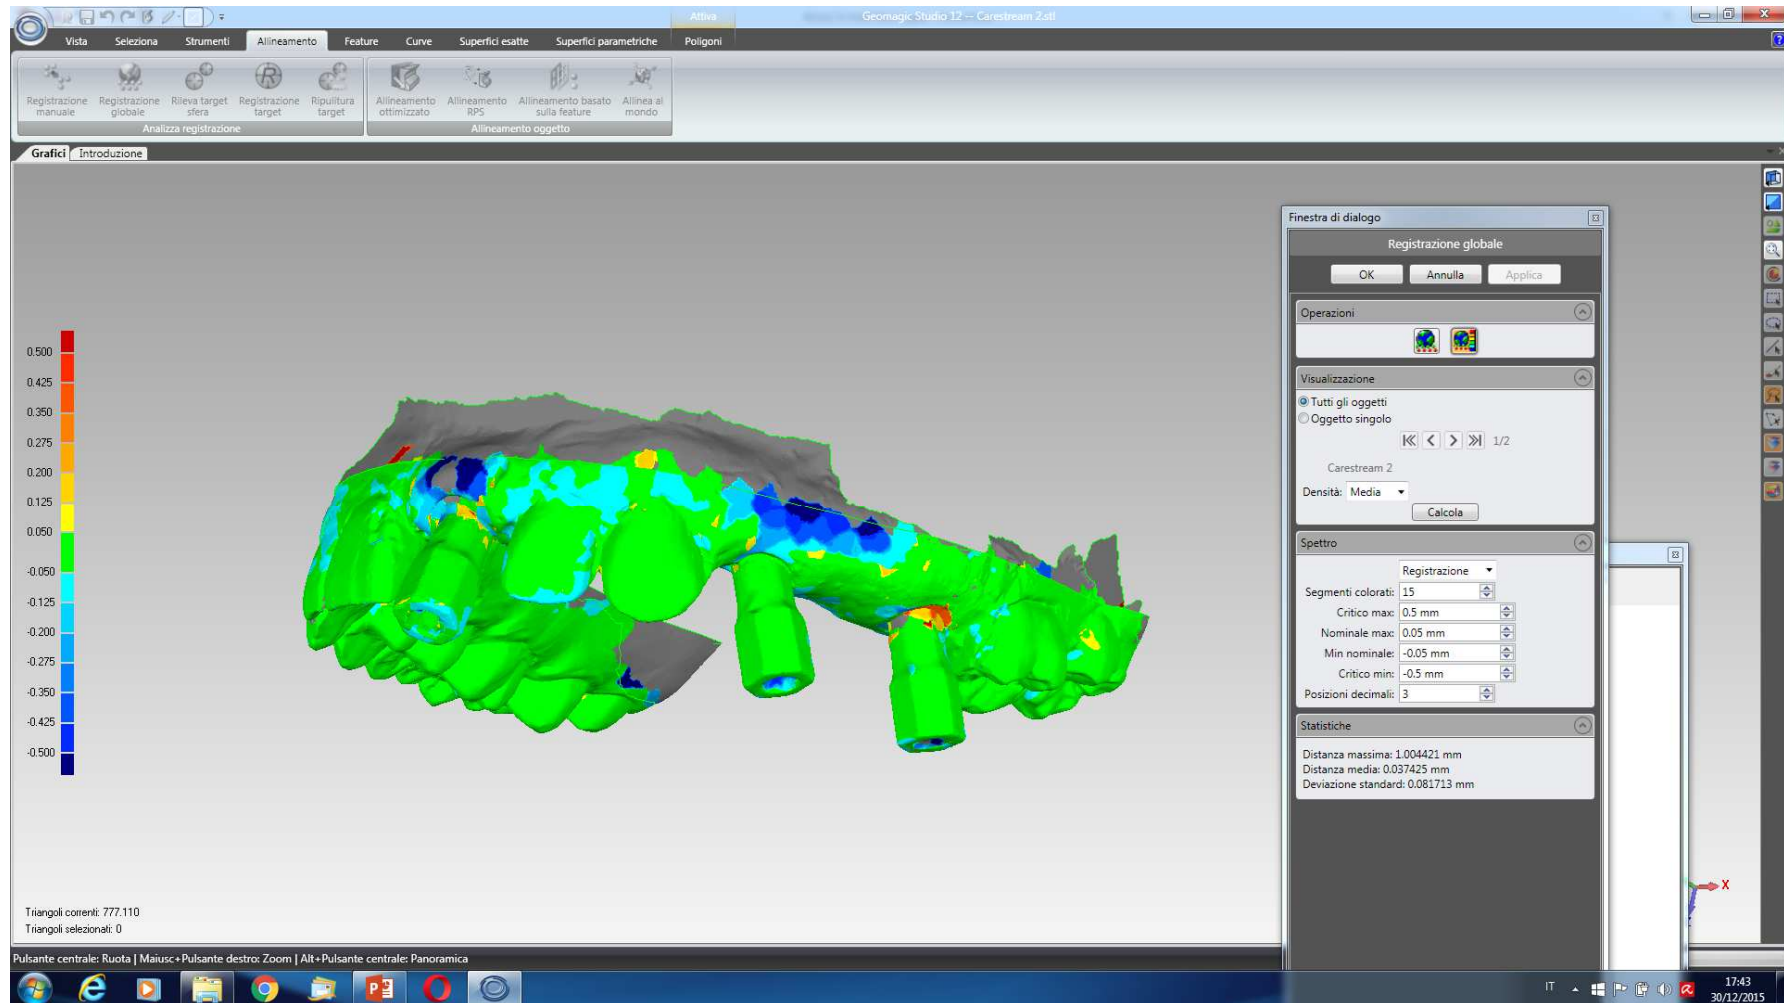

# Care 3 vs REF (IMETRIC)

Geomagic Studio 12 -- Carestream 3.stl

Vista Selezione Strumenti Allineamento Feature Curve Superfici esatte Superfici parametriche Poligoni

Registrazione manuale Registrazione globale Rileva target sfera Registrazione target Ripulitura target

Analizza registrazione

Allineamento ottimizzato Allineamento RPS Allineamento basato sulla feature Allinea al mondo

Allineamento oggetto

Grafici | Introduzione

0.500  
0.425  
0.350  
0.275  
0.200  
0.125  
0.050  
-0.050  
-0.125  
-0.200  
-0.275  
-0.350  
-0.425  
-0.500

Triangoli correnti: 763.648  
Triangoli selezionati: 0

Pulsante centrale: Ruota | Maiusc+Pulsante destro: Zoom | Alt+Pulsante centrale: Panoramica

Finestra di dialogo

Registrazione globale

OK Annulla Applica

Operazioni

Visualizzazione

Tutti gli oggetti  
 Oggetto singolo

«< >» 1/2

Carestream 3

Densità: Media

Calcola

Spettro

Registrazione

Segmenti colorati: 15

Critico max: 0.5 mm

Nominale max: 0.05 mm

Min nominale: -0.05 mm

Critico min: -0.5 mm

Posizioni decimali: 3

Statistiche

Distanza massima: 0.950583 mm  
Distanza media: 0.050207 mm  
Deviazione standard: 0.081083 mm

# Care 3 vs REF (IMETRIC)

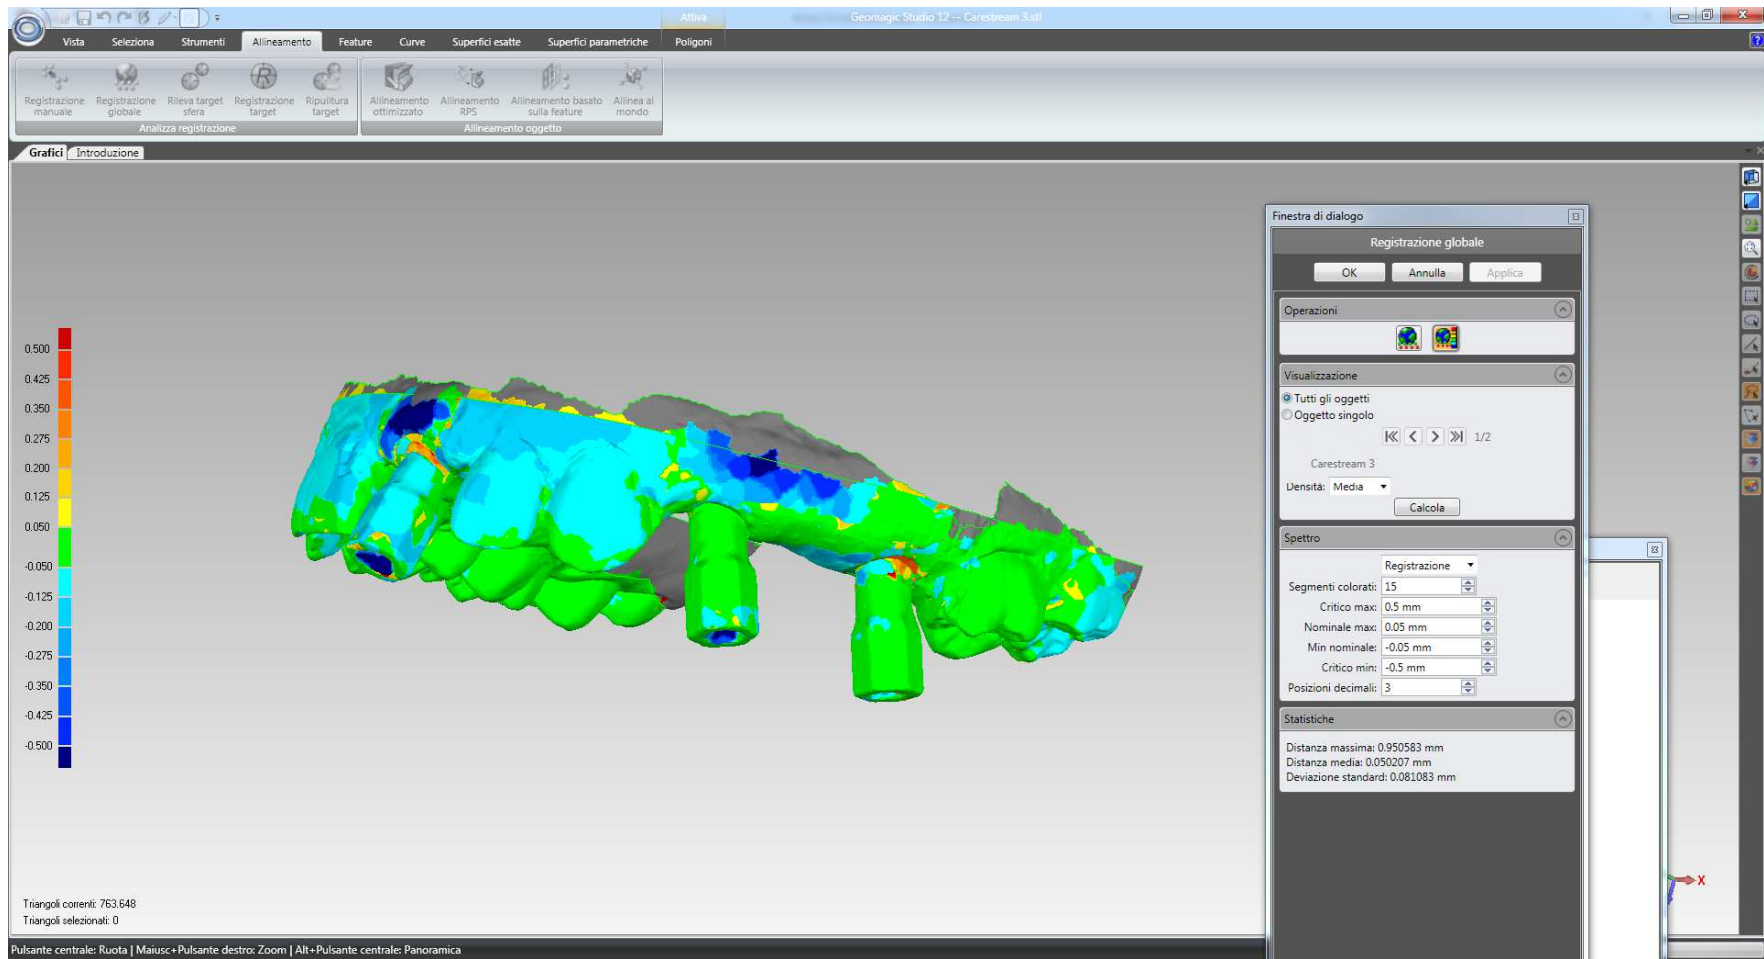

# Care 4 vs REF (IMETRIC)

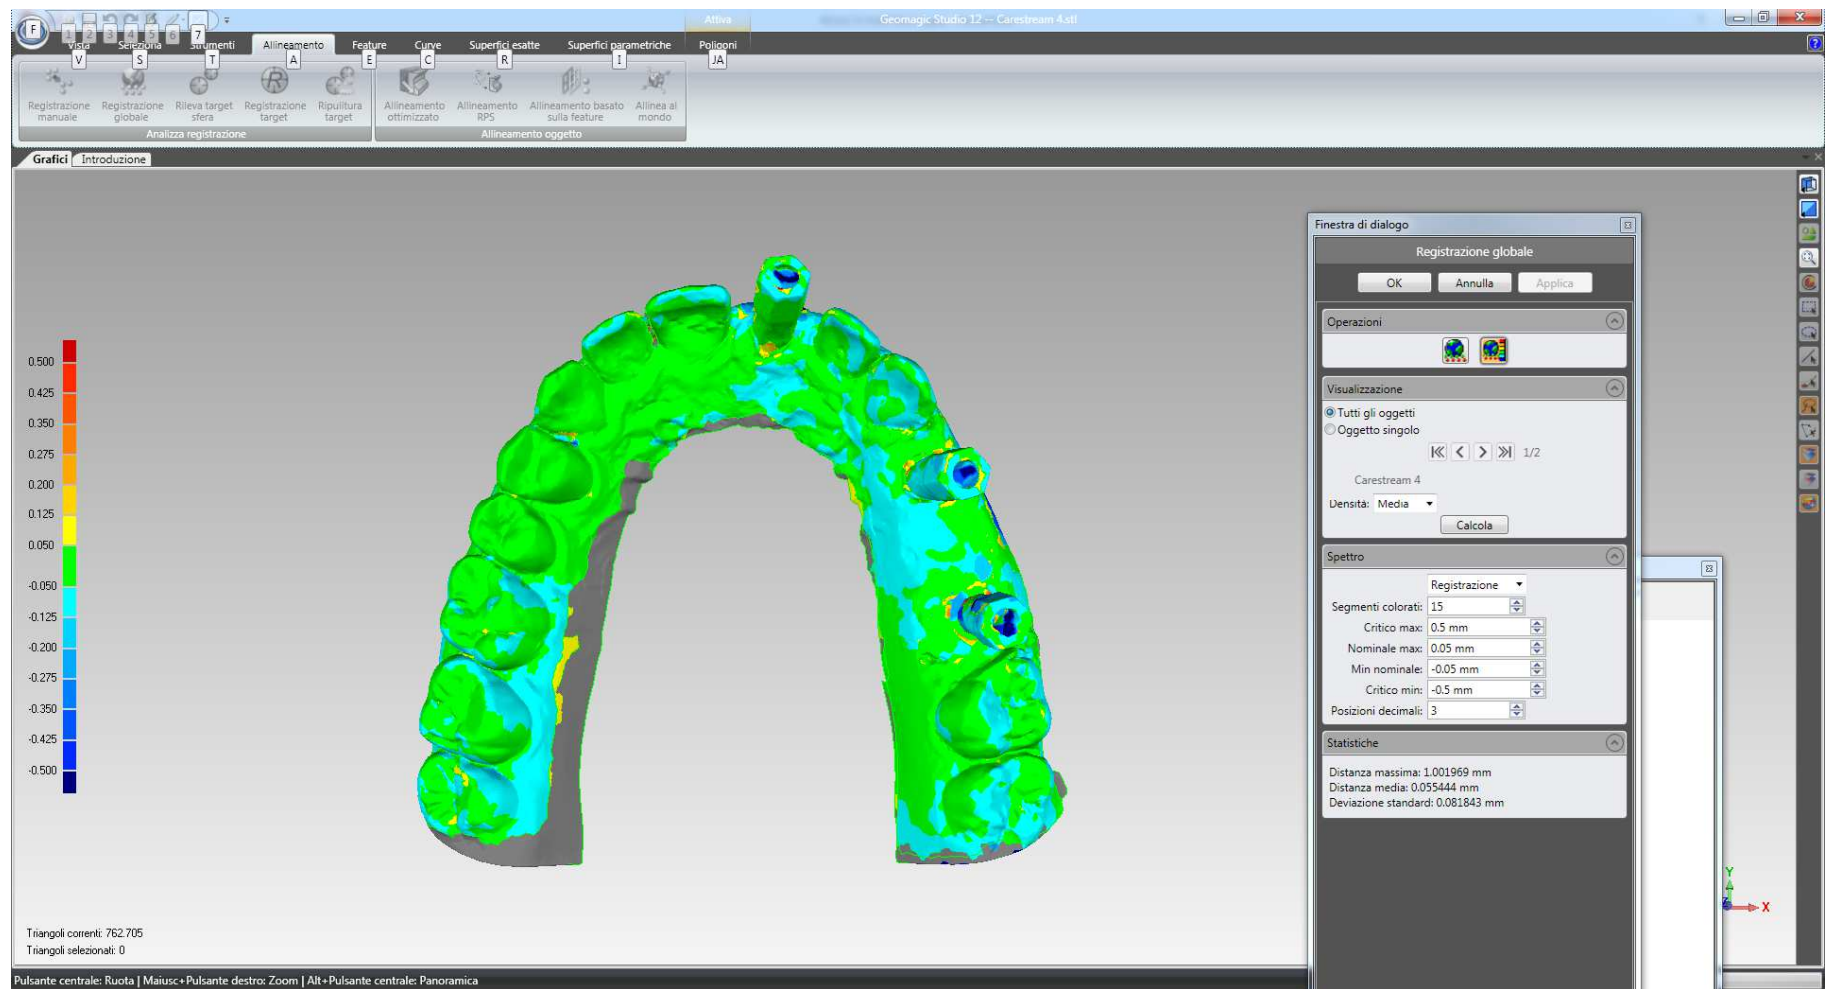

# Care 4 vs REF (IMETRIC)

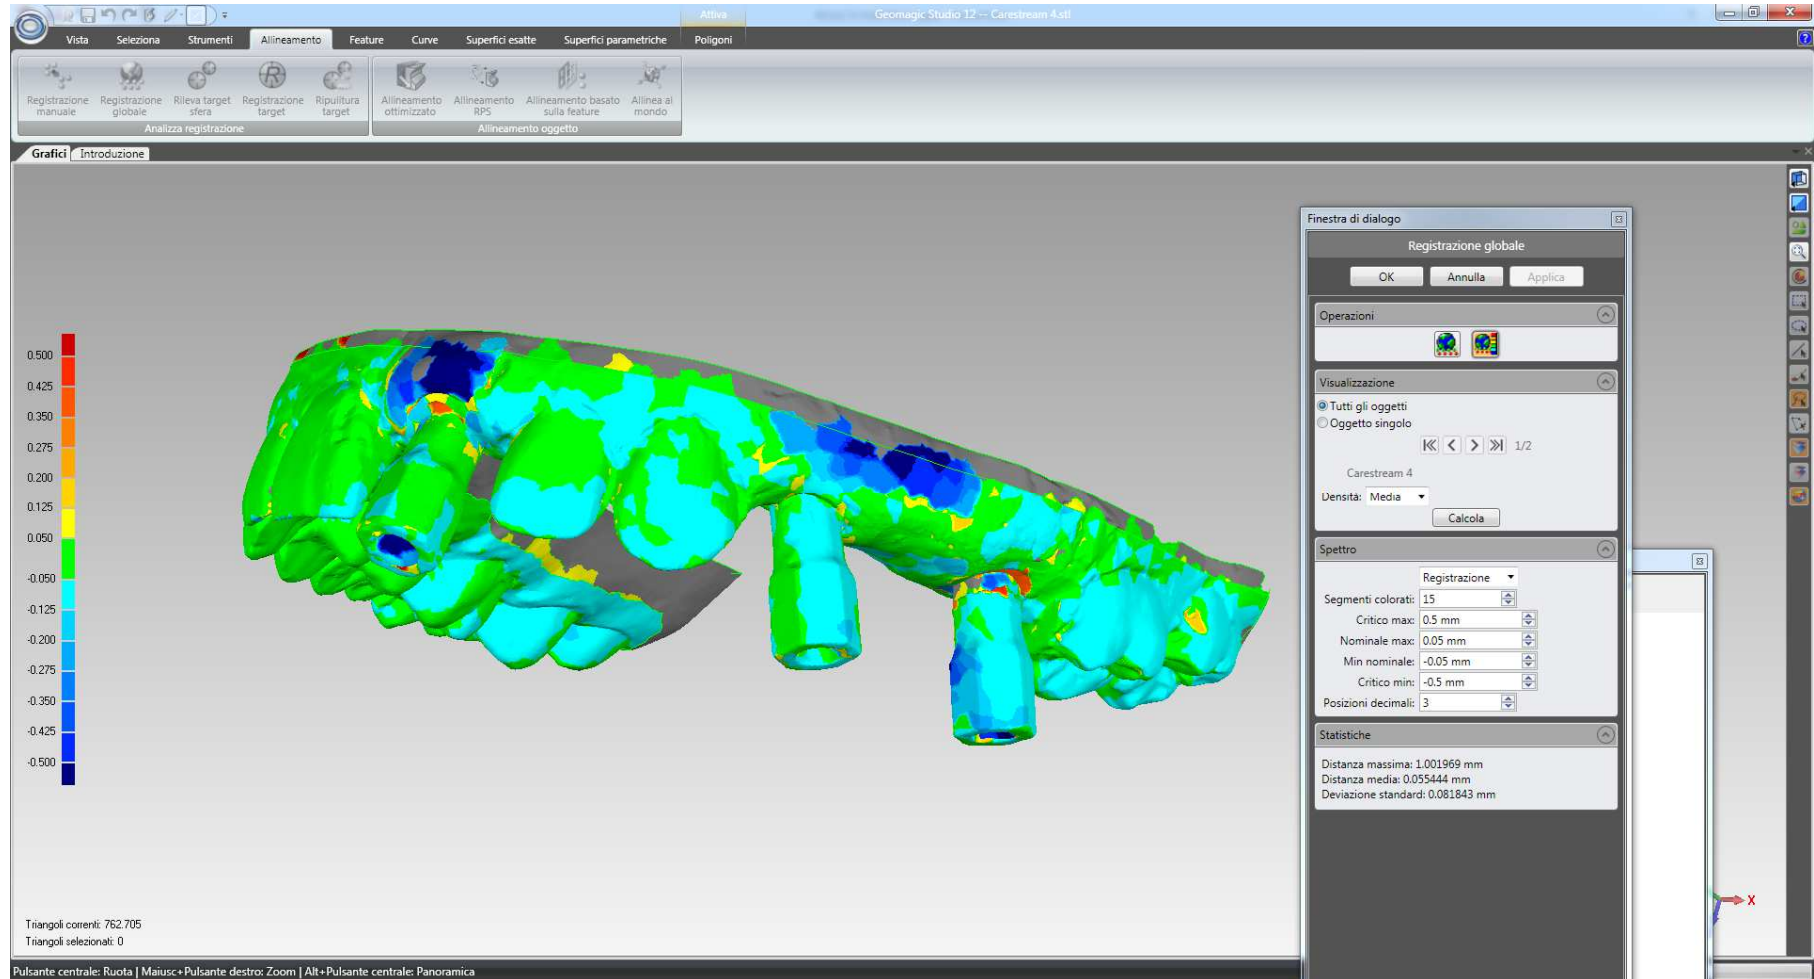

# Care 5 vs REF (IMETRIC)

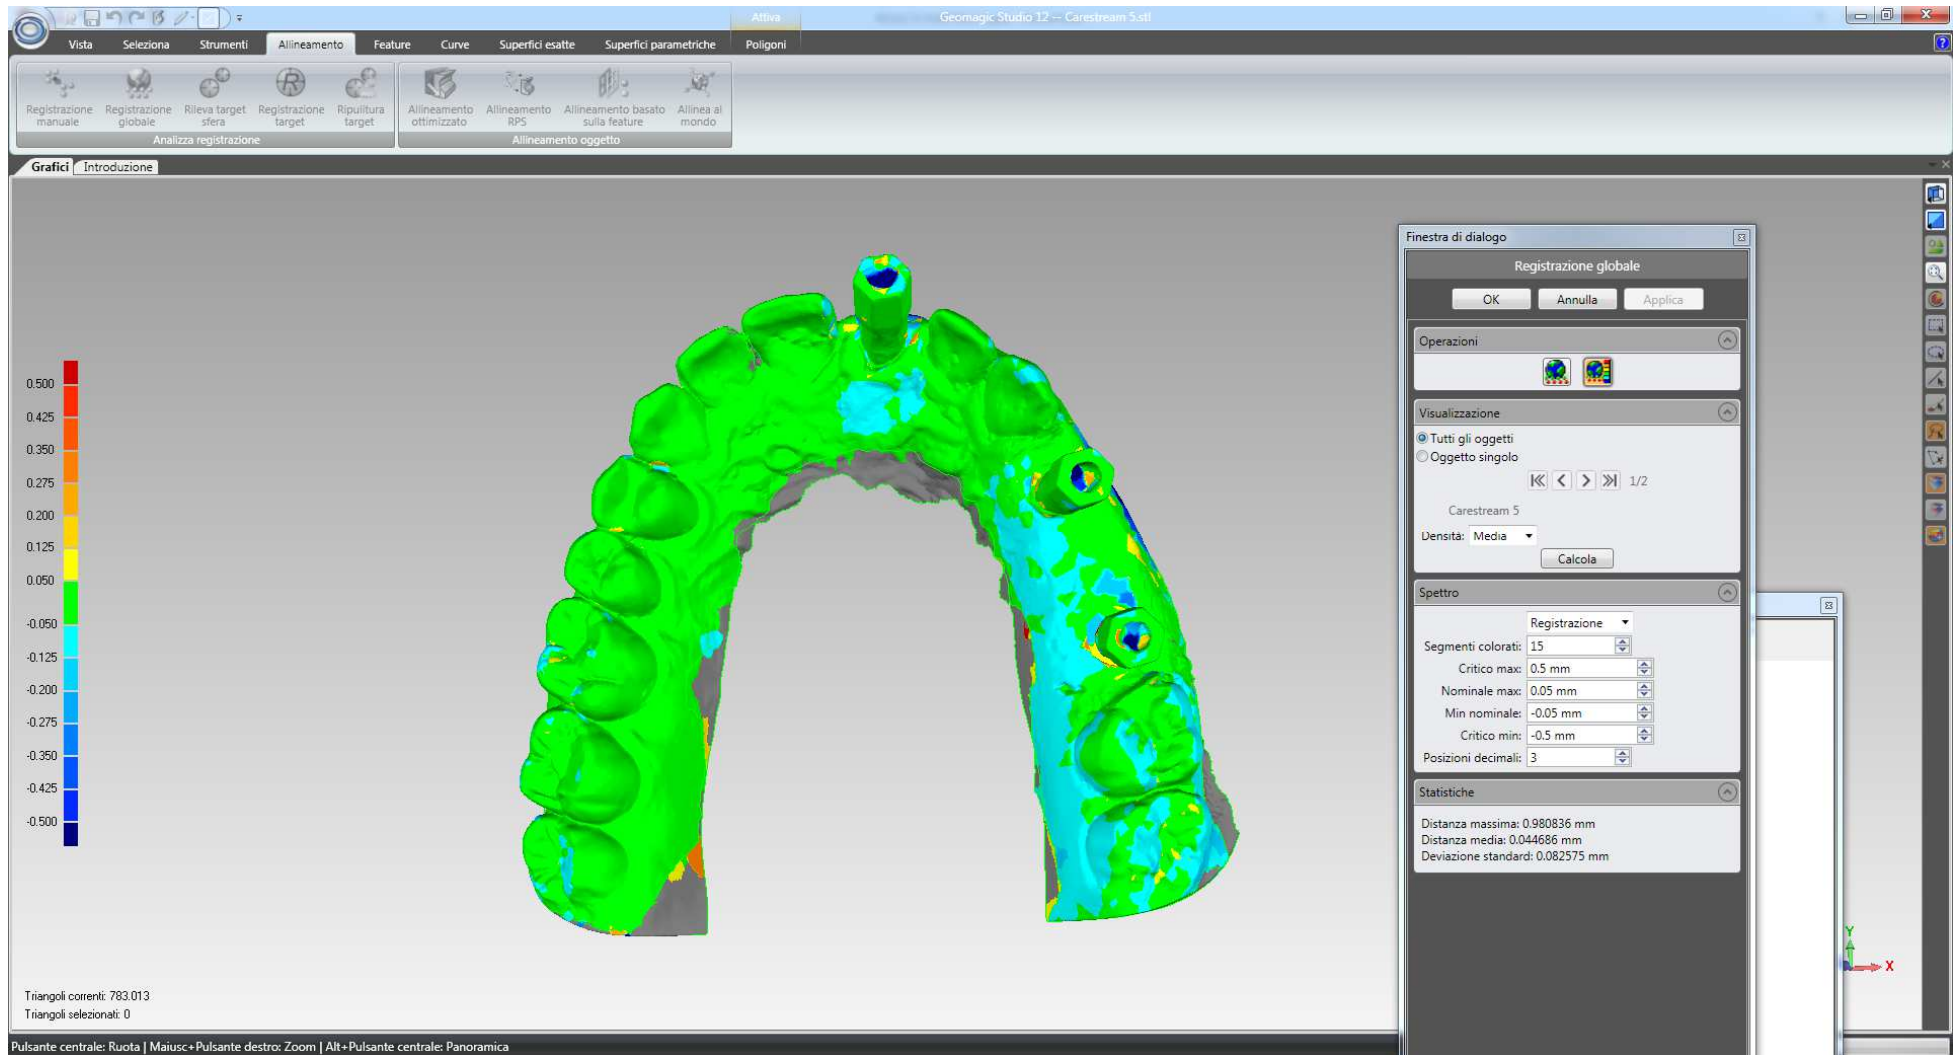



# Care 5 vs REF (IMETRIC)

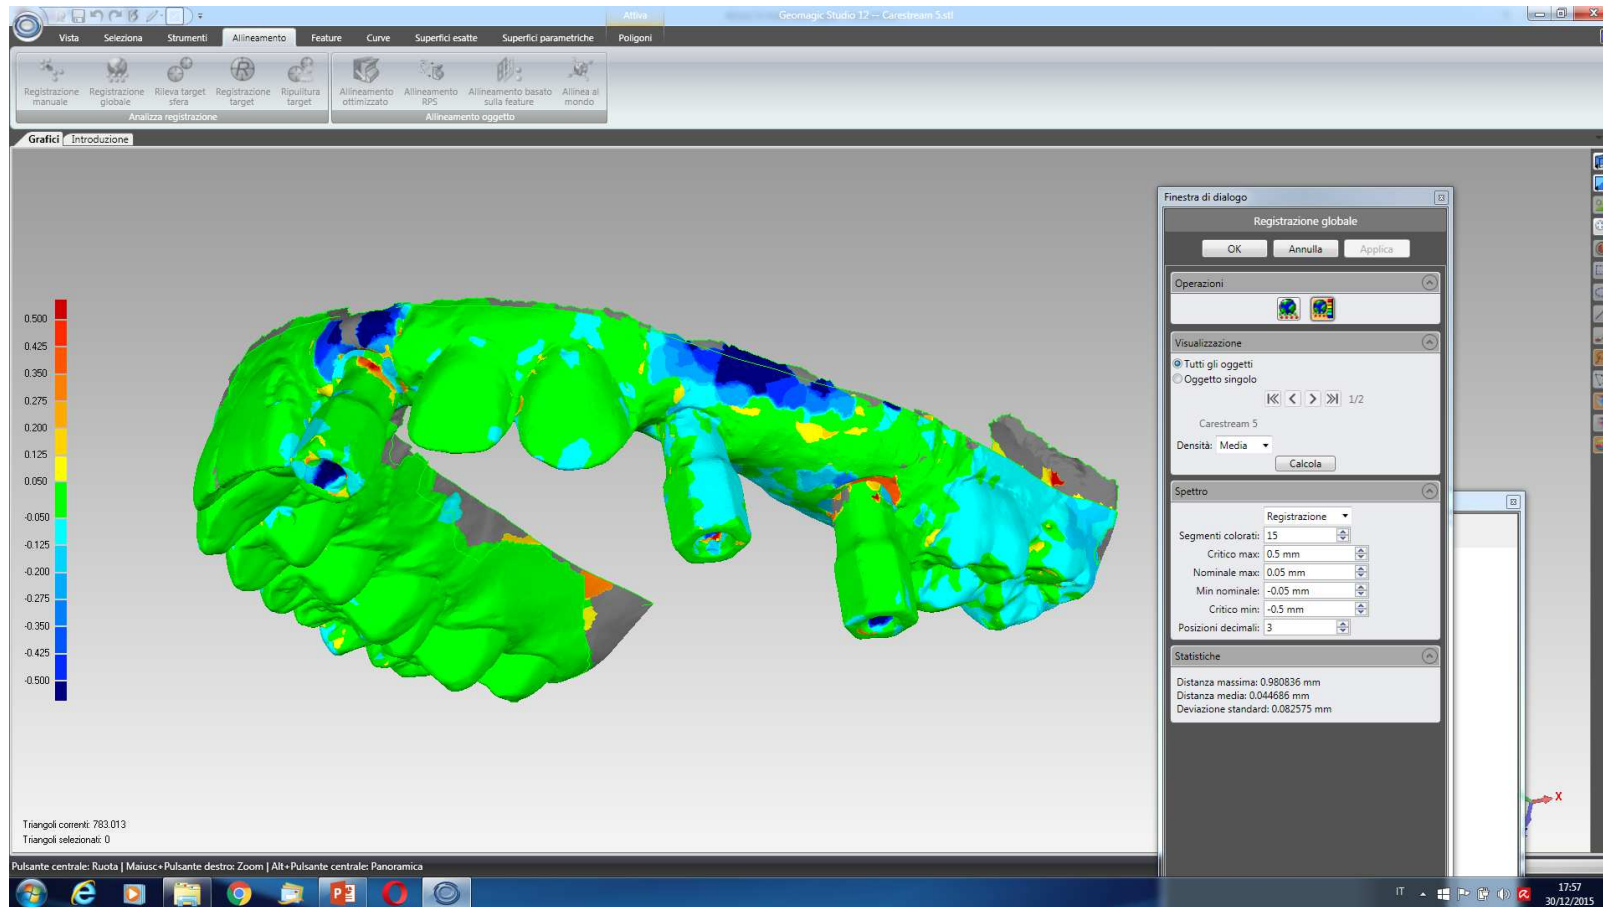

General trueness of Carestream in the partially edentulous model

|              | Mean distance | SD    | Maximum distance |
|--------------|---------------|-------|------------------|
| Carestream 1 | 0.053         | 0.081 | 0.999            |
| Carestream 2 | 0.037         | 0.081 | 1.004            |
| Carestream 3 | 0.050         | 0.081 | 0.950            |
| Carestream 4 | 0.055         | 0.081 | 1.001            |
| Carestream 5 | 0.044         | 0.082 | 0.980            |

**Overall Care general trueness: 0.047 (0.007)**

# Plan 1 vs REF (IMETRIC)

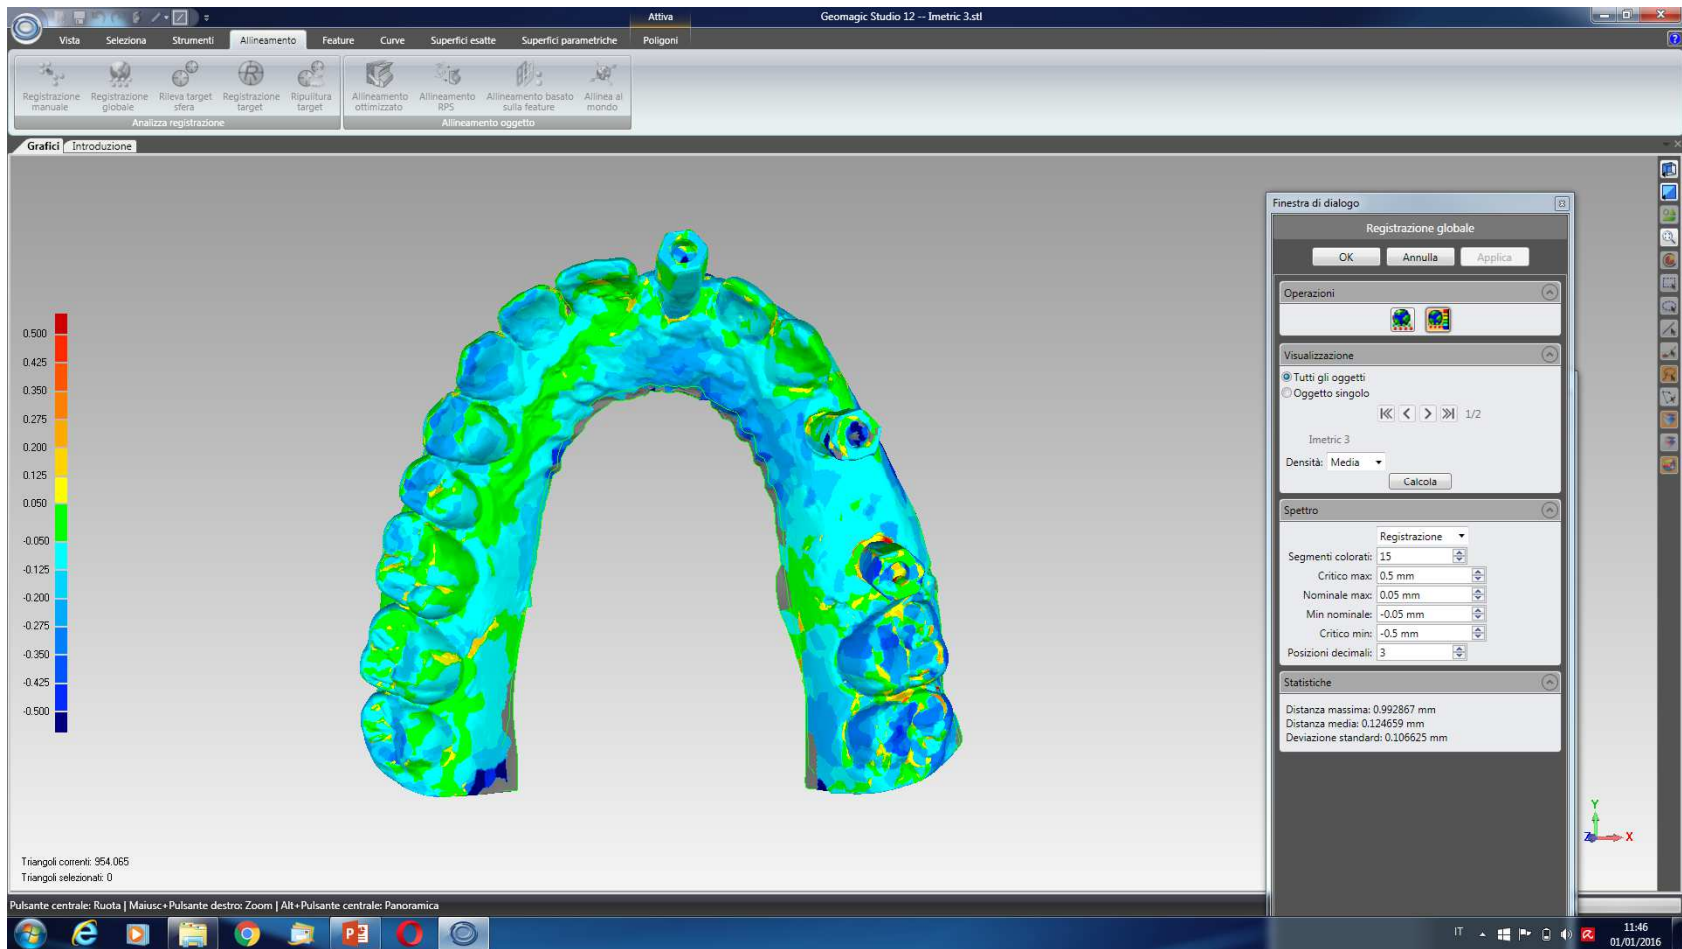

# Plan 1 vs REF (IMETRIC)

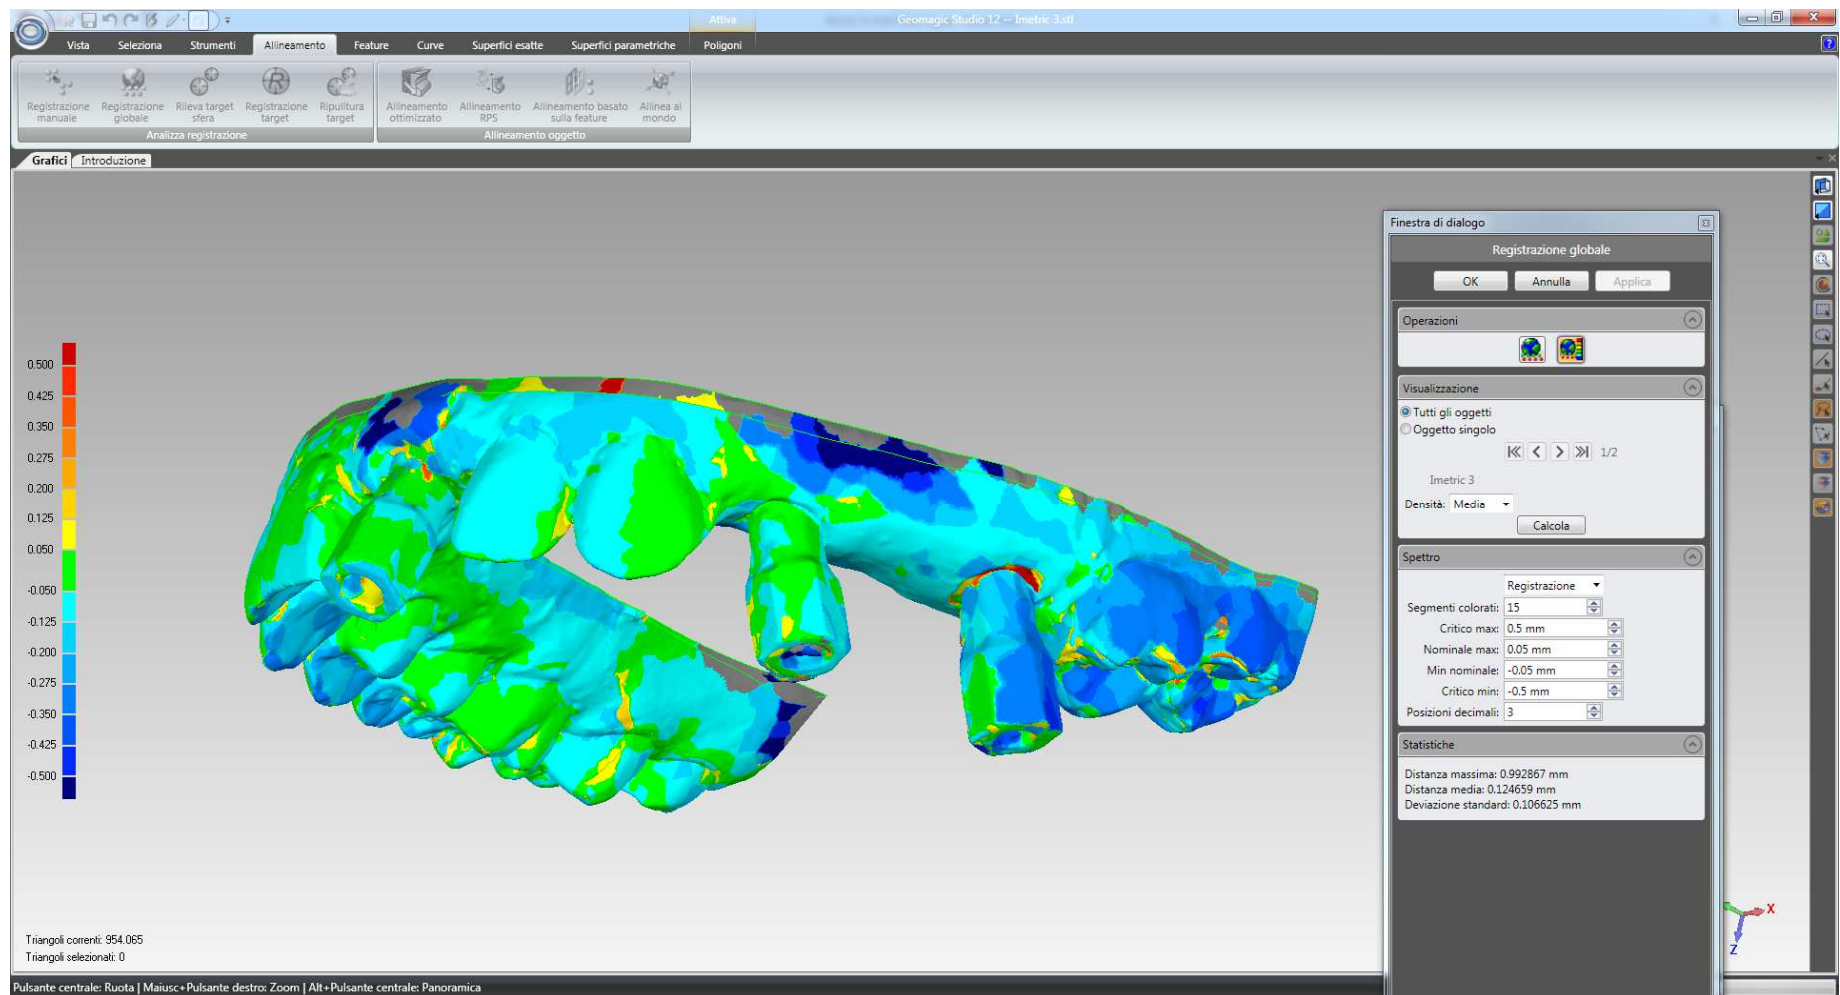

# Plan 2 vs REF (IMETRIC)

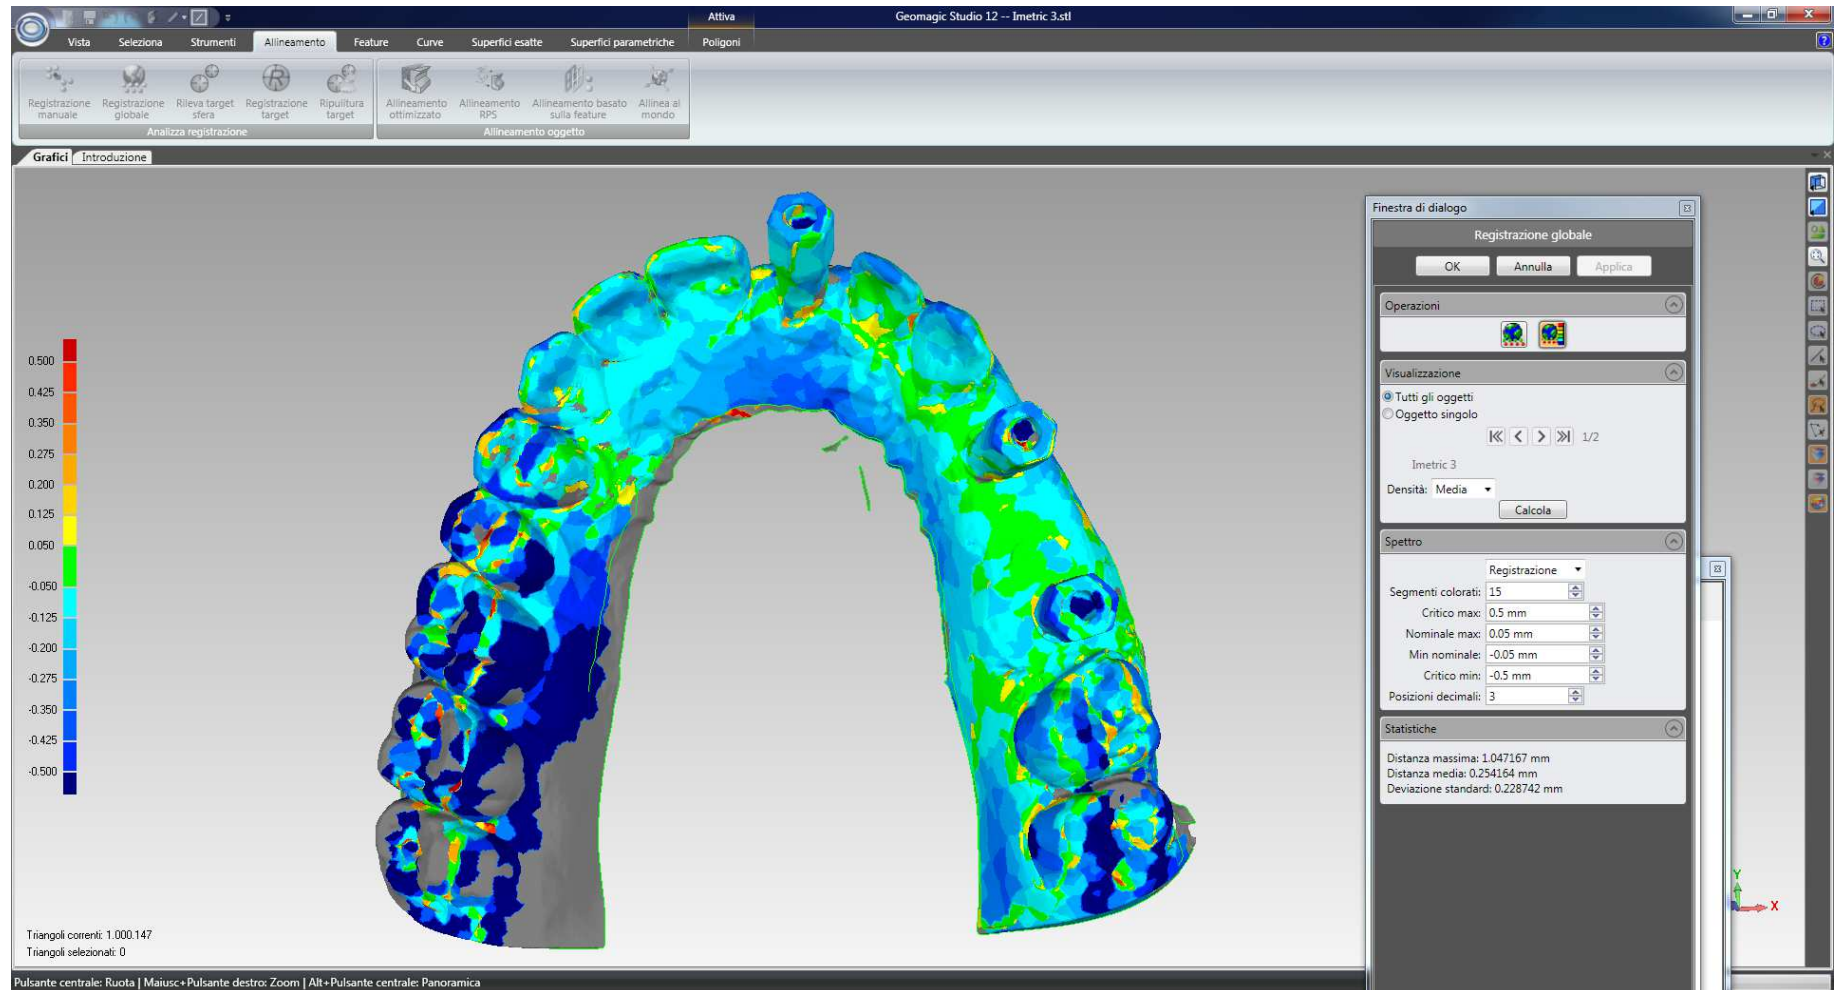

# Plan 2 vs REF (IMETRIC)

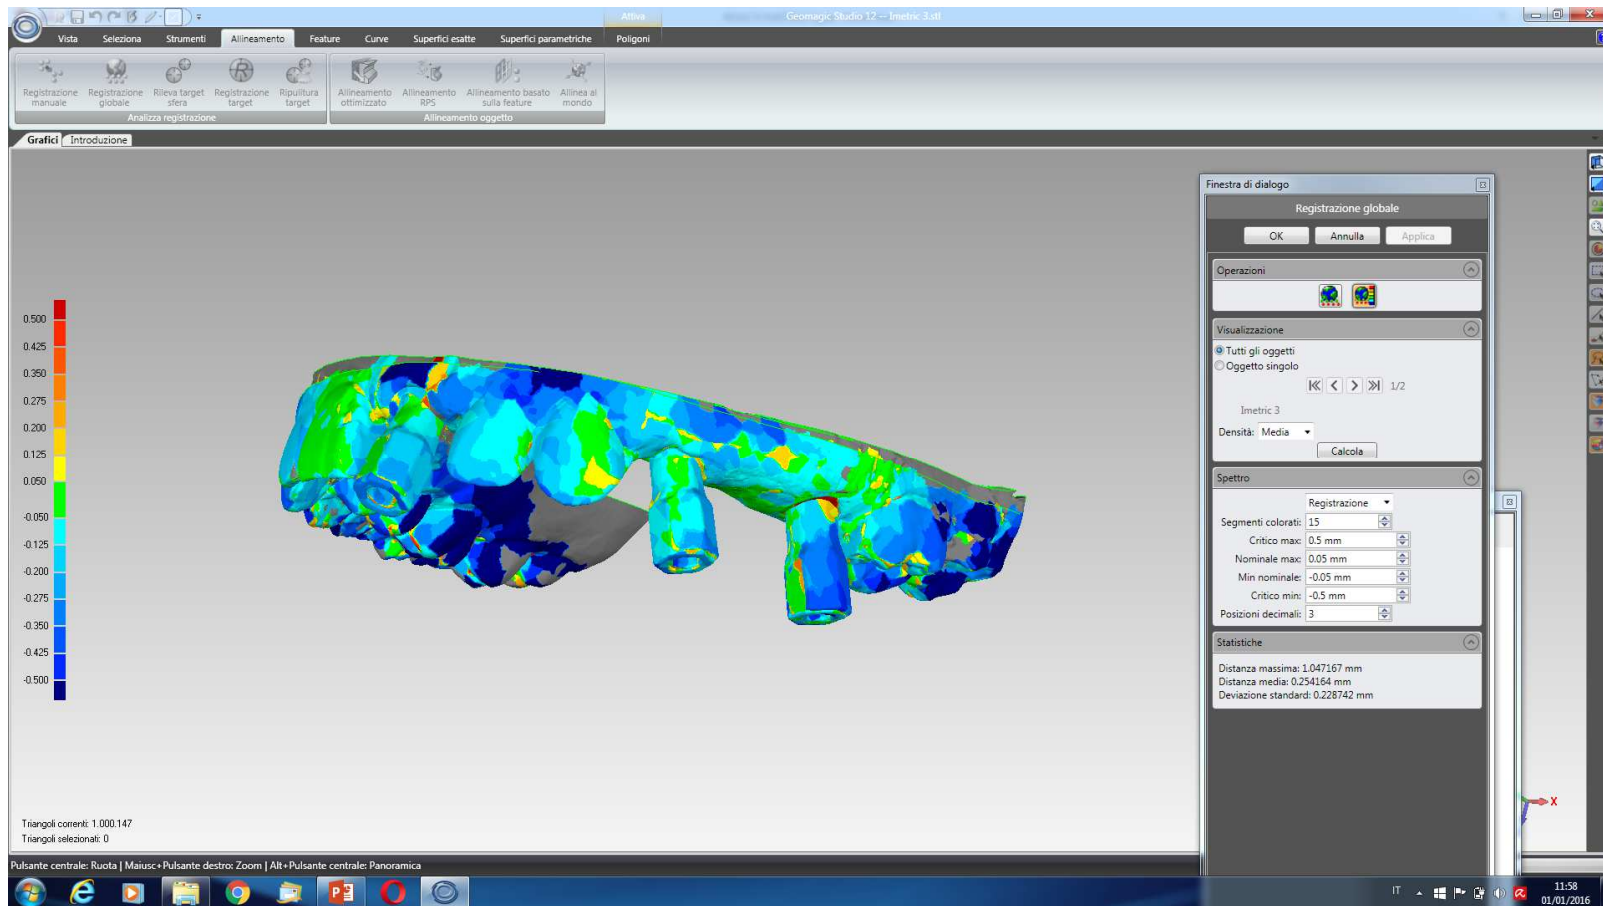

# Plan 3 vs REF (IMETRIC)

Geomagic Studio 12 -- Imetric 3.stl

Vista Selezione Strumenti Allineamento Feature Curve Superfici esatte Superfici parametriche Poligoni

Registrazione manuale Registrazione globale Rileva target sfera Registrazione target Ripulitura target Analizza registrazione

Allineamento ottimizzato Allineamento RPS Allineamento basato sulla feature Allinea al mondo Allineamento oggetto

Grafici Introduzione

0.500  
0.425  
0.350  
0.275  
0.200  
0.125  
0.050  
-0.050  
-0.125  
-0.200  
-0.275  
-0.350  
-0.425  
-0.500

Triangoli correnti: 377.044  
Triangoli selezionati: 0

Pulsante centrale: Ruota | Maiusc+Pulsante destro: Zoom | Alt+Pulsante centrale: Panoramica

Finestra di dialogo

Registrazione globale

OK Annulla Applica

Operazioni

Visualizzazione

Tutti gli oggetti  
 Oggetto singolo

Imetric 3

Densità: Media

Calcola

Spettro

Registrazione

Segmenti colorati: 15

Critico max: 0.5 mm

Nominale max: 0.05 mm

Min nominale: -0.05 mm

Critico min: -0.5 mm

Posizioni decimali: 3

Statistiche

Distanza massima: 1.068608 mm  
Distanza media: 0.271259 mm  
Deviazione standard: 0.238340 mm

# Plan 3 vs REF (IMETRIC)

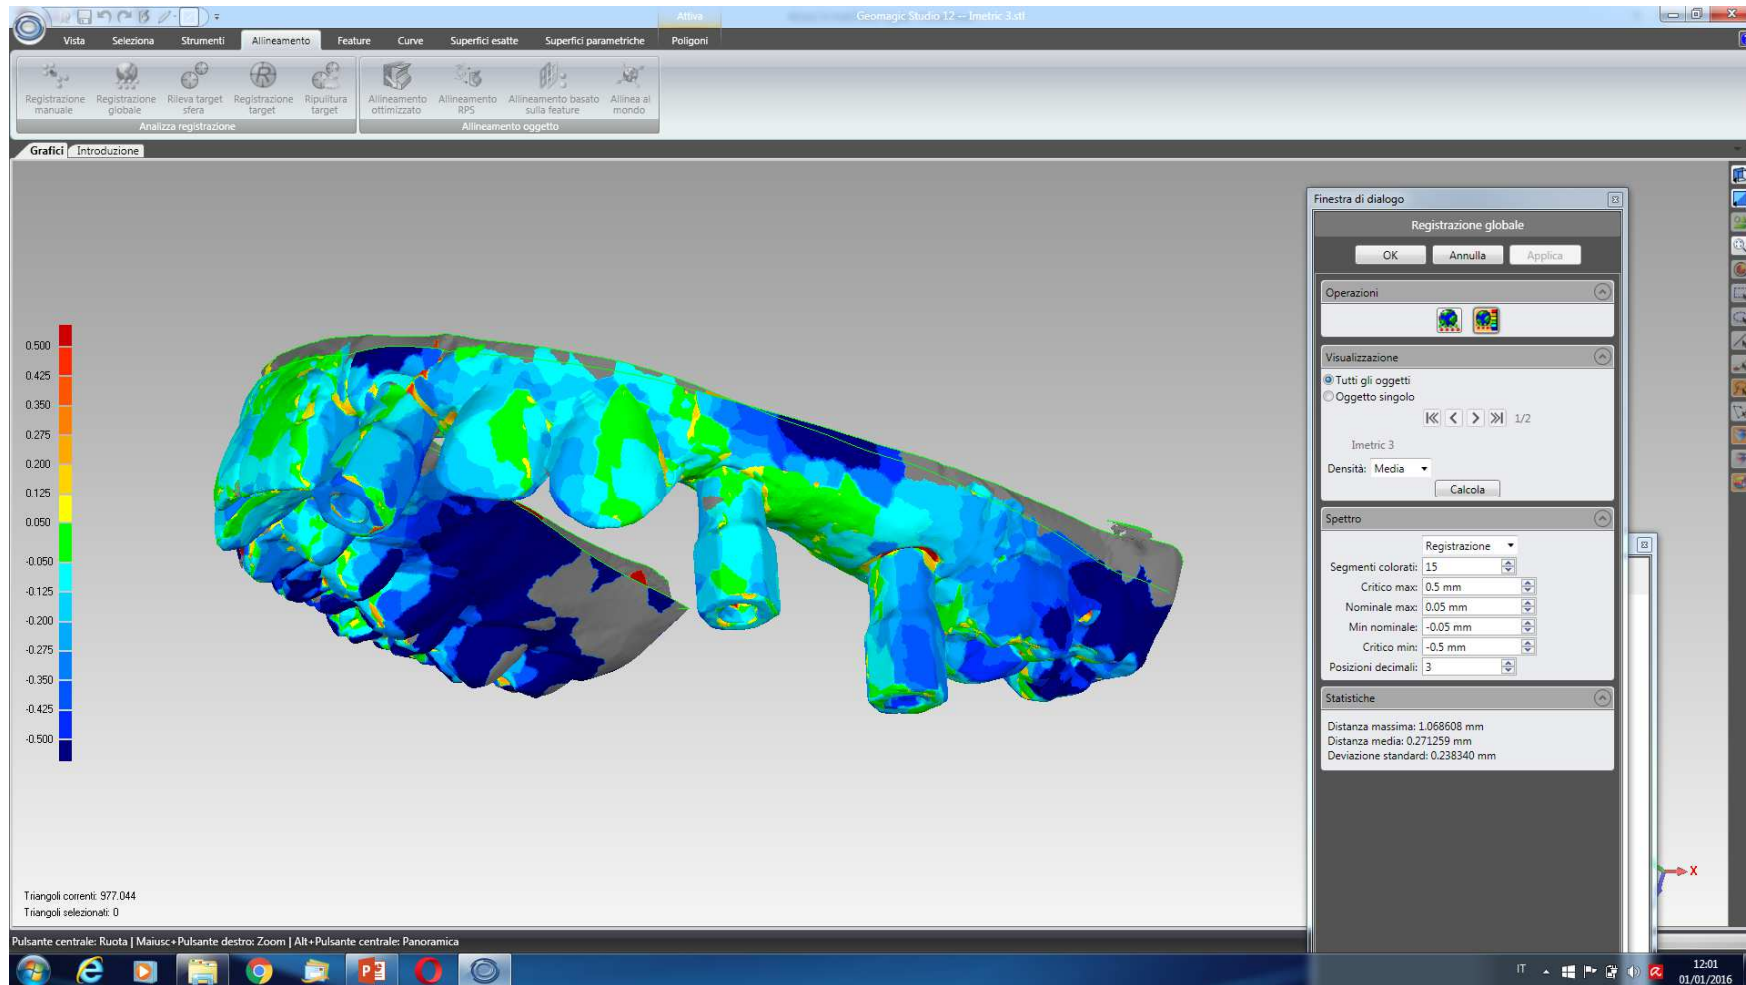



# Plan 4 vs REF (IMETRIC)

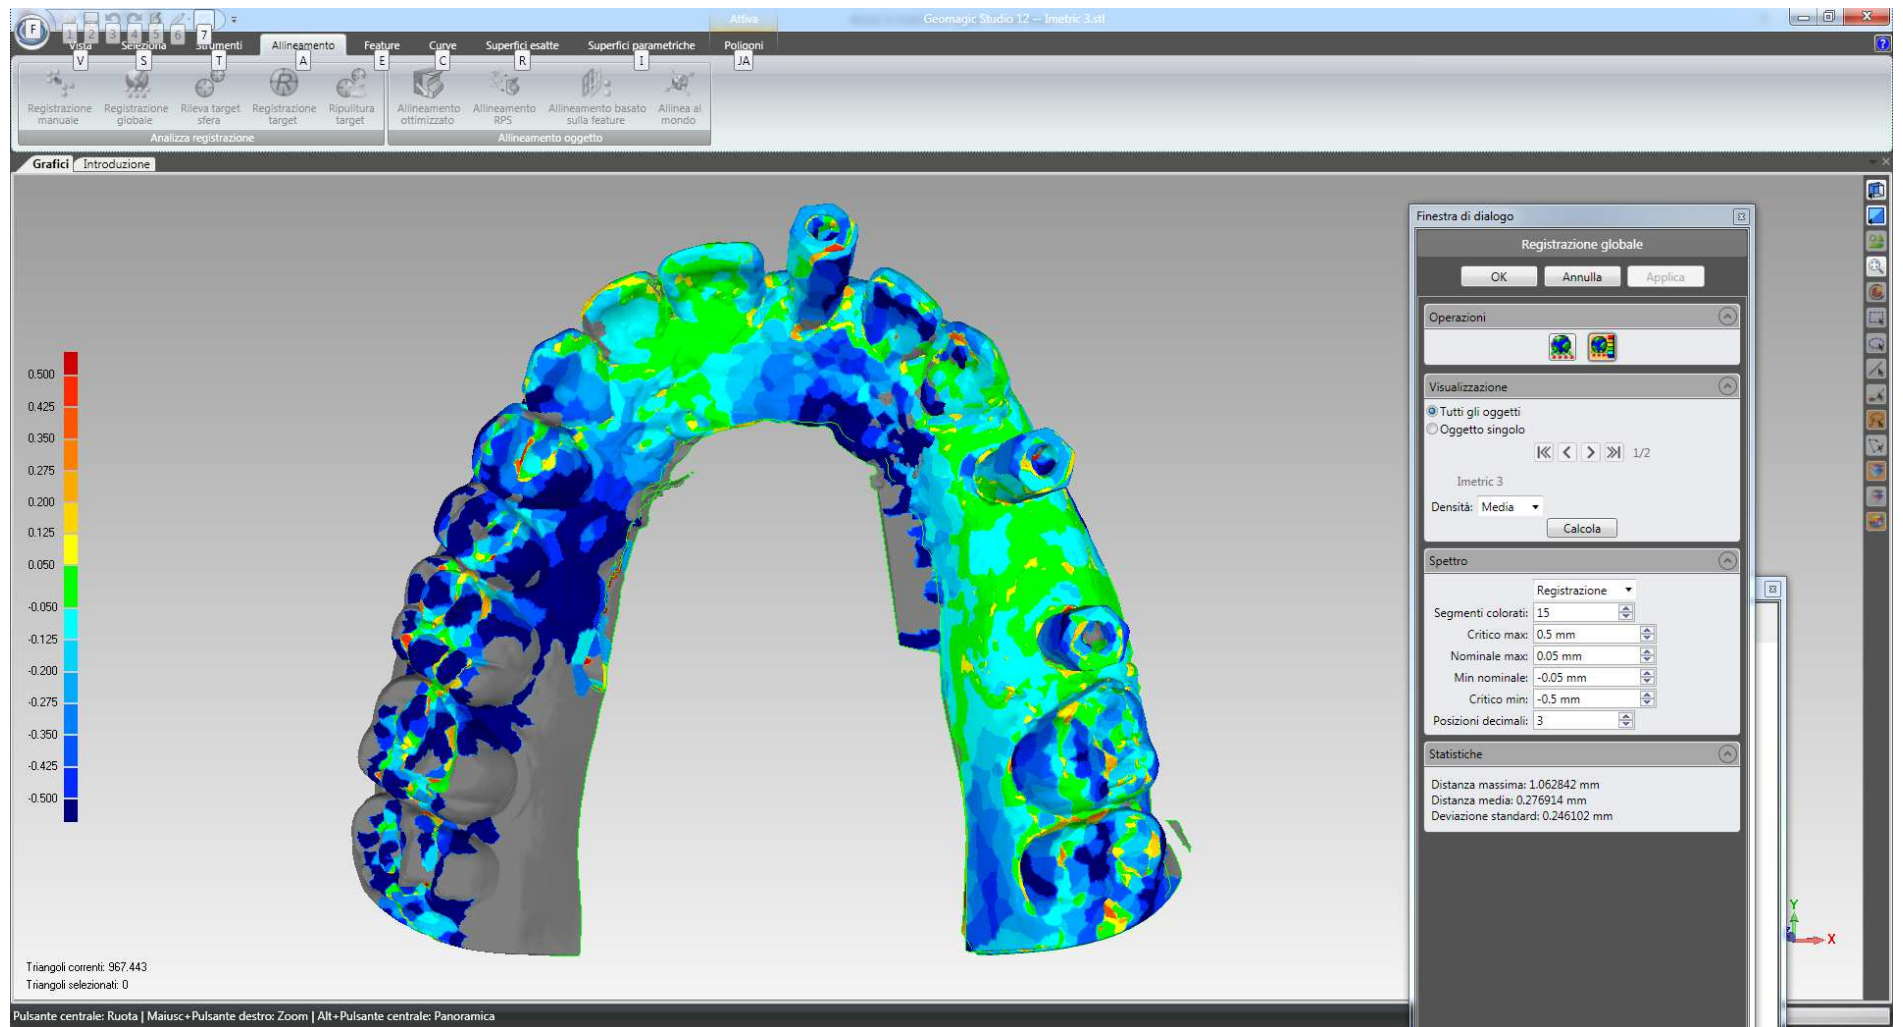

# Plan 4 vs REF (IMETRIC)

Geomagic Studio 12 -- Imetric 3.stl

Vista Selezione Strumenti Allineamento Feature Curve Superfici esatte Superfici parametriche Poligoni

Registrazione manuale Registrazione globale Rileva target sfera Registrazione target Ripulitura target Allineamento ottimizzato Allineamento RPS Allineamento basato sulla feature Allinea al mondo

Analizza registrazione Allineamento oggetto

Grafici Introduzione

0.500  
0.425  
0.350  
0.275  
0.200  
0.125  
0.050  
-0.050  
-0.125  
-0.200  
-0.275  
-0.350  
-0.425  
-0.500

Triangoli correnti: 967.443  
Triangoli selezionati: 0

Pulsante centrale: Ruota | Maiusc+Pulsante destro: Zoom | Alt+Pulsante centrale: Panoramica

Finestra di dialogo

Registrazione globale

OK Annulla Applica

Operazioni

Visualizzazione

Tutti gli oggetti  
 Oggetto singolo

Imetric 3

Densità: Media

Calcola

Spettro

Registrazione

Segmenti colorati: 15

Critico max: 0.5 mm

Nominale max: 0.05 mm

Min nominale: -0.05 mm

Critico min: -0.5 mm

Posizioni decimali: 3

Statistiche

Distanza massima: 1.062842 mm  
Distanza media: 0.276914 mm  
Deviazione standard: 0.246102 mm

12:05  
01/01/2016

# Plan 5 vs REF (IMETRIC)

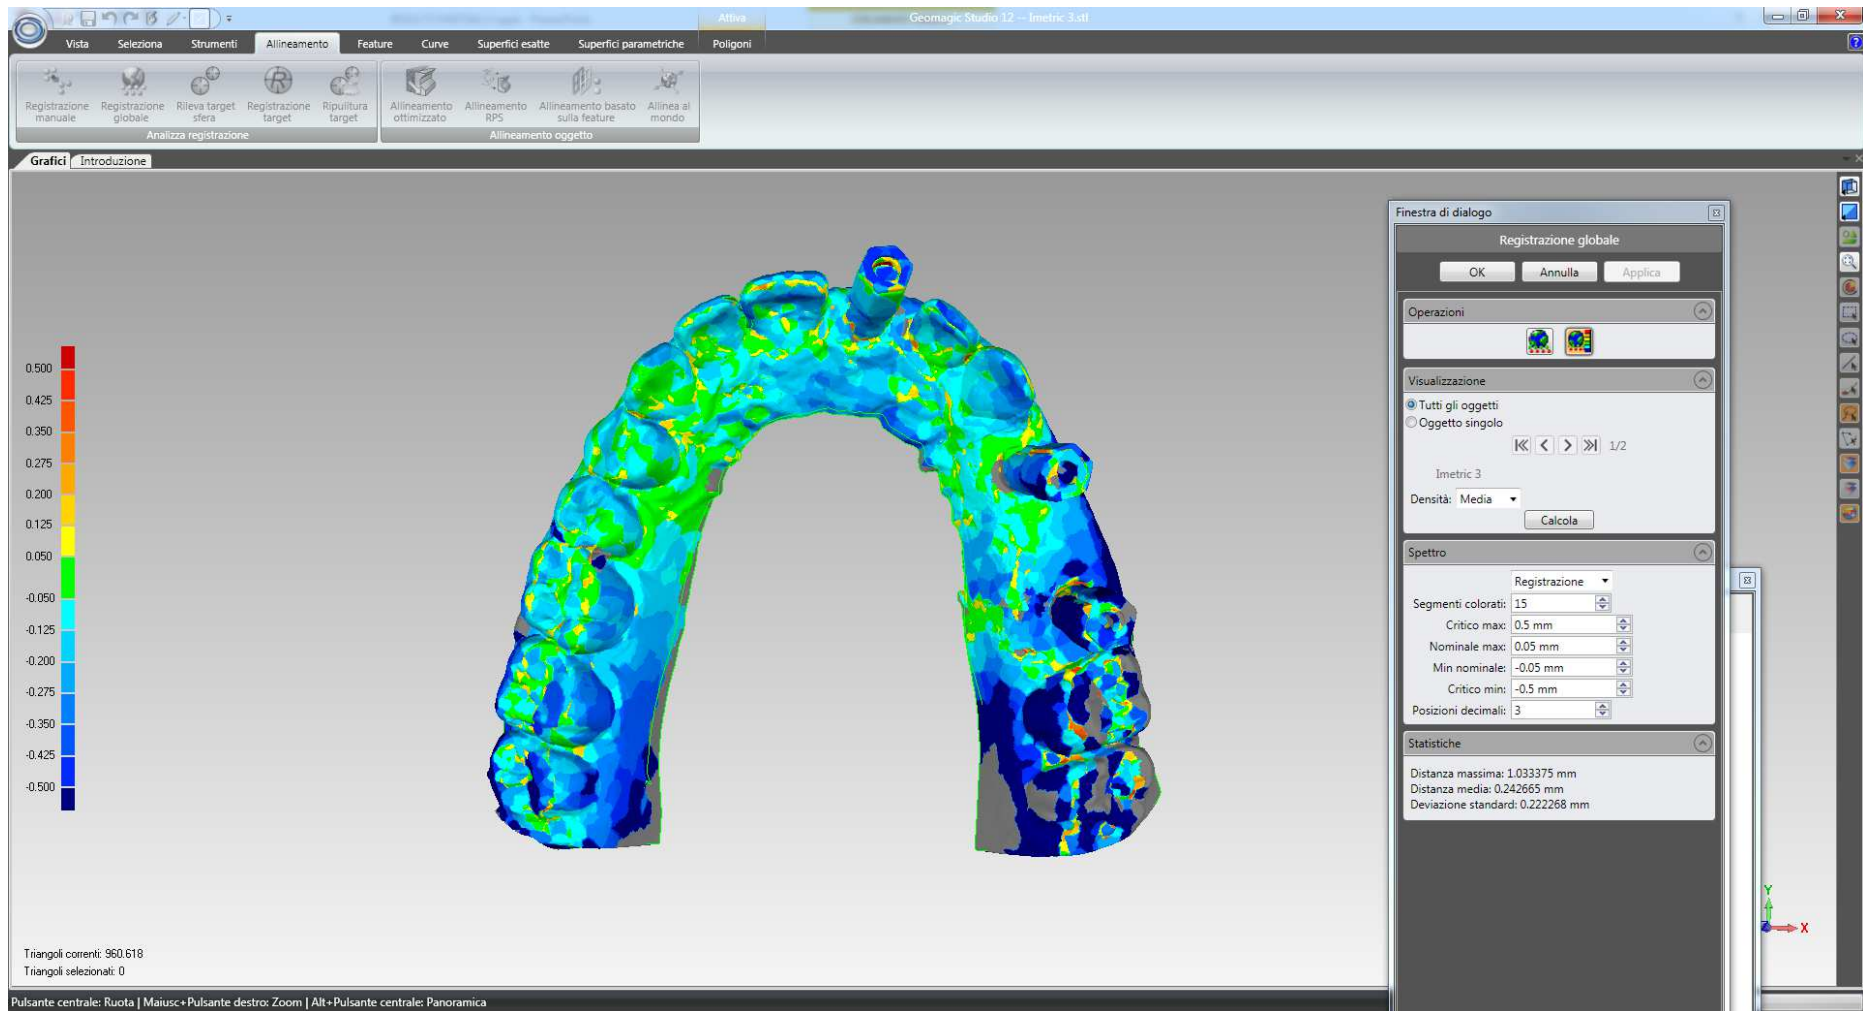

# Plan 5 vs REF (IMETRIC)

The screenshot displays the Geomagic Studio 12 interface. The main window shows a 3D model of a mechanical part with a color-coded registration error map. The error map ranges from -0.500 mm (dark blue) to 0.500 mm (red). The software interface includes a menu bar, a toolbar with registration and alignment tools, and a 'Finestra di dialogo' (Dialog Window) on the right with 'Registrazione globale' (Global Registration) settings.

**Finestra di dialogo - Registrazione globale**

OK Annulla Applica

Operazioni

Visualizzazione

Tutti gli oggetti  
 Oggetto singolo

Imetric 3

Densità: Media

Calcola

Spettro

Registrazione

Segmenti colorati: 15

Critico max: 0.5 mm

Nominale max: 0.05 mm

Min nominale: -0.05 mm

Critico min: -0.5 mm

Posizioni decimali: 3

Statistiche

Distanza massima: 1.033375 mm  
Distanza media: 0.242665 mm  
Deviazione standard: 0.222268 mm

Triangoli conenti: 960.618  
Triangoli selezionati: 0

Pulsante centrale: Ruota | Maiusc+Pulsante destro: Zoom | Alt+Pulsante centrale: Panoramica

Planmeca general trueness in the partially edentulous model

|        | Mean distance | SD    | Maximum distance |
|--------|---------------|-------|------------------|
| Plan 1 | 0.124         | 0.106 | 0.992            |
| Plan 2 | 0.254         | 0.228 | 1.047            |
| Plan 3 | 0.271         | 0.238 | 1.065            |
| Plan 4 | 0.276         | 0.246 | 1.060            |
| Plan 5 | 0.242         | 0.222 | 1.033            |

**Overall Plane general trueness: 0.233 (0.062)**

GENERAL PRECISION EVALUATIONS FOR TRIOS, ZFX INTRASCAN, CARESTREAM, PLANSCAN (SCANS WERE RANDOM BUT HERE WE ORDERED THEM) IN THE PARTIALLY EDENTULOUS MODEL

GENERAL SETTINGS FOR FINAL REGISTRATION (TRUENESS):

0.5 mm, 0.05 mm, -0.05 mm, -0.5 mm (see scale)

# Trios 5 as reference (best accuracy) vs trios 1

The screenshot displays the Geomagic Studio 12 interface. The main window shows a 3D model of a dental arch with a registration error map. The color scale on the left indicates error values from -0.500 mm (dark blue) to 0.500 mm (dark red). The model is mostly green, indicating low error, with some blue and cyan areas. The software interface includes a menu bar (Vista, Selezione, Strumenti, Allineamento, Feature, Curve, Superfici esatte, Superfici parametriche, Poligoni) and a toolbar with various registration and alignment tools. A dialog box titled "Finestra di dialogo" is open, showing registration settings for "Trios 5". The dialog box includes sections for "Operazioni", "Visualizzazione", "Spettro", and "Statistiche".

**Finestra di dialogo**

Registrazione globale

OK Annulla Applica

Operazioni

Visualizzazione

Tutti gli oggetti  
 Oggetto singolo

Trios 5

Densità: Media

Calcola

Spettro

Registrazione

Segmenti colorati: 15

Critico max: 0.5 mm

Nominale max: 0.05 mm

Min nominale: -0.05 mm

Critico min: -0.5 mm

Posizioni decimali: 3

Statistiche

Distanza massima: 0.959816 mm  
Distanza media: 0.028025 mm  
Deviazione standard: 0.044577 mm

Modelli

Trios 1  
Trios 5  
Modello

Triangoli correnti: 596.355  
Triangoli selezionati: 0

Pulsante centrale: Ruota | Maiusc+Pulsante destro: Zoom | Alt+Pulsante centrale: Panoramica

18:29  
30/12/2015

# Trios 5 as reference (best accuracy) vs trios 1

The screenshot displays the Geomagic Studio 12 interface. The main window shows a 3D model of a hand, rendered in green, with a color scale on the left ranging from -0.500 to 0.500. The software's menu bar includes options like Vista, Selezione, Strumenti, Allineamento, Feature, Curve, Superfici esatte, Superfici parametriche, and Poligoni. The toolbar contains various registration and alignment tools. A dialog box titled "Finestra di dialogo" is open on the right, showing the "Registrazione globale" settings. The "Operazioni" section includes icons for registration. The "Visualizzazione" section has radio buttons for "Tutti gli oggetti" (selected) and "Oggetto singolo". The "Spettro" section shows registration parameters: "Segmenti colorati: 15", "Critico max: 0.5 mm", "Nominale max: 0.05 mm", "Min nominale: -0.05 mm", "Critico min: -0.5 mm", and "Posizioni decimali: 3". The "Statistiche" section displays: "Distanza massima: 0.959816 mm", "Distanza media: 0.028025 mm", and "Deviazione standard: 0.044577 mm". The status bar at the bottom indicates "Triangoli correnti: 596.355" and "Triangoli selezionati: 0". The Windows taskbar at the bottom shows the system clock as 18:30 on 30/12/2015.

Finestra di dialogo

Registrazione globale

OK Annulla Applica

Operazioni

Visualizzazione

Tutti gli oggetti  
 Oggetto singolo

Trios 5

Densità: Media

Calcola

Spettro

Registrazione

Segmenti colorati: 15

Critico max: 0.5 mm

Nominale max: 0.05 mm

Min nominale: -0.05 mm

Critico min: -0.5 mm

Posizioni decimali: 3

Statistiche

Distanza massima: 0.959816 mm  
Distanza media: 0.028025 mm  
Deviazione standard: 0.044577 mm

Triangoli correnti: 596.355  
Triangoli selezionati: 0

Pulsante centrale: Ruota | Maiusc+Pulsante destro: Zoom | Alt+Pulsante centrale: Panoramica

18:30  
30/12/2015



## Trios 5 as reference (best accuracy) vs trios 2

The screenshot displays the Geomagic Studio 12 interface. The main window shows a 3D model of a dental arch with a registration error map. The color scale on the left ranges from -0.500 mm (blue) to 0.500 mm (red). The registration error map shows a mix of blue and green, indicating a registration accuracy between 0.050 mm and 0.250 mm. The dialog box on the right, titled 'Finestra di dialogo', shows the following registration statistics for 'Trios 5':

| Statistiche         | Valore      |
|---------------------|-------------|
| Distanza massima    | 0.916622 mm |
| Distanza media      | 0.068618 mm |
| Deviazione standard | 0.068050 mm |

Additional information from the dialog box:

- Operazioni: [Icone di registrazione]
- Visualizzazione:  Tutti gli oggetti,  Oggetto singolo
- Trios 5
- Densità: Media
- Calcola
- Spettro: Registrazione, Segmenti colorati: 15
- Critico max: 0.5 mm
- Nominale max: 0.05 mm
- Min nominale: -0.05 mm
- Critico min: -0.5 mm
- Posizioni decimali: 3
- Statistiche: Distanza massima: 0.916622 mm, Distanza media: 0.068618 mm, Deviazione standard: 0.068050 mm

At the bottom left, the status bar shows: Triangoli correnti: 598.064, Triangoli selezionati: 0. The bottom of the screen shows the Windows taskbar with the time 18:40 and date 30/12/2015.

## Trios 5 as reference (best accuracy) vs trios 2

The screenshot displays the Geomagic Studio 12 interface. The main window shows a 3D model of a dental arch with a color-coded registration error map. The error scale ranges from -0.500 mm (blue) to 0.500 mm (red). The model is primarily green and cyan, indicating low error, with some yellow and orange areas. A vertical color scale legend is on the left side of the main window.

The software interface includes a menu bar with options like Vista, Selezione, Strumenti, Allineamento, Feature, Curve, Superfici esatte, Superfici parametriche, and Poligoni. Below the menu bar is a toolbar with various registration and alignment tools.

The 'Finestra di dialogo' (Dialog Window) is open, showing the 'Registrazione globale' (Global Registration) settings. The 'Operazioni' section has two icons. The 'Visualizzazione' section has radio buttons for 'Tutti gli oggetti' (selected) and 'Oggetto singolo'. Below this, there are navigation arrows and a '1/2' indicator. The 'Densità' is set to 'Media' and there is a 'Calcola' button.

The 'Spettro' (Spectrum) section shows a dropdown menu set to 'Registrazione' and a 'Segmenti colorati' value of 15. Below this are input fields for 'Critico max: 0.5 mm', 'Nominale max: 0.05 mm', 'Min nominale: -0.05 mm', and 'Critico min: -0.5 mm'. The 'Posizioni decimali' is set to 3.

The 'Statistiche' (Statistics) section displays the following data:

- Distanza massima: 0.916622 mm
- Distanza media: 0.068618 mm
- Deviazione standard: 0.068050 mm

At the bottom left of the main window, the following information is displayed:

- Triangoli correnti: 598.064
- Triangoli selezionati: 0

At the bottom of the window, a status bar contains the text: Pulsante centrale: Ruota | Maiusc+Pulsante destro: Zoom | Alt+Pulsante centrale: Panoramica

## Trios 5 as reference (best accuracy) vs trios 3

The screenshot displays the Geomagic Studio 12 interface. The main window shows a 3D model of a dental arch with a color-coded registration error map. The error scale ranges from -0.500 mm (blue) to 0.500 mm (red). The model is primarily green and cyan, indicating low error. A dialog box titled "Finestra di dialogo" is open on the right, showing registration statistics for "Trios 5".

**Finestra di dialogo**

Registrazione globale

OK Annulla Applica

Operazioni

Visualizzazione

Tutti gli oggetti  
 Oggetto singolo

Trios 5

Densità: Media

Calcola

Spettro

Registrazione

Segmenti colorati: 15

Critico max: 0.5 mm

Nominale max: 0.05 mm

Min nominale: -0.05 mm

Critico min: -0.5 mm

Posizioni decimali: 3

Statistiche

Distanza massima: 0.981670 mm  
Distanza media: 0.054705 mm  
Deviazione standard: 0.061050 mm

Triangoli correnti: 606.531  
Triangoli selezionati: 0

Pulsante centrale: Ruota | Maiusc+Pulsante destro: Zoom | Alt+Pulsante centrale: Panoramica

## Trios 5 as reference (best accuracy) vs trios 3

The screenshot displays the Geomagic Studio 12 interface. The main window shows a 3D model of a hand with a registration error map. The color scale on the left indicates the magnitude of the error, ranging from -0.500 (dark blue) to 0.500 (dark red). The model is primarily green and cyan, indicating low error, with some yellow and orange areas. The software interface includes a menu bar with options like Vista, Selezione, Strumenti, Allineamento, Feature, Curve, Superfici esatte, Superfici parametriche, and Poligoni. A toolbar below the menu bar contains various registration and alignment tools. The 'Finestra di dialogo' (Dialog Window) is open on the right, showing the 'Registrazione globale' (Global Registration) settings. The 'Operazioni' section shows icons for registration and alignment. The 'Visualizzazione' section has radio buttons for 'Tutti gli oggetti' (selected) and 'Oggetto singolo'. The 'Spettro' section shows 'Registrazione' selected, with 'Segmenti colorati' set to 15, 'Critico max' at 0.5 mm, 'Nominale max' at 0.05 mm, 'Min nominale' at -0.05 mm, 'Critico min' at -0.5 mm, and 'Posizioni decimali' at 3. The 'Statistiche' section shows 'Distanza massima: 0.981670 mm', 'Distanza media: 0.054705 mm', and 'Deviazione standard: 0.061050 mm'. The status bar at the bottom indicates 'Triangoli correnti: 606.531' and 'Triangoli selezionati: 0'. The bottom-most status bar shows navigation controls: 'Pulsante centrale: Ruota | Maiusc+Pulsante destro: Zoom | Alt+Pulsante centrale: Panoramica'.

Triangoli correnti: 606.531  
Triangoli selezionati: 0

Pulsante centrale: Ruota | Maiusc+Pulsante destro: Zoom | Alt+Pulsante centrale: Panoramica

## Trios 5 as reference (best accuracy) vs trios 4

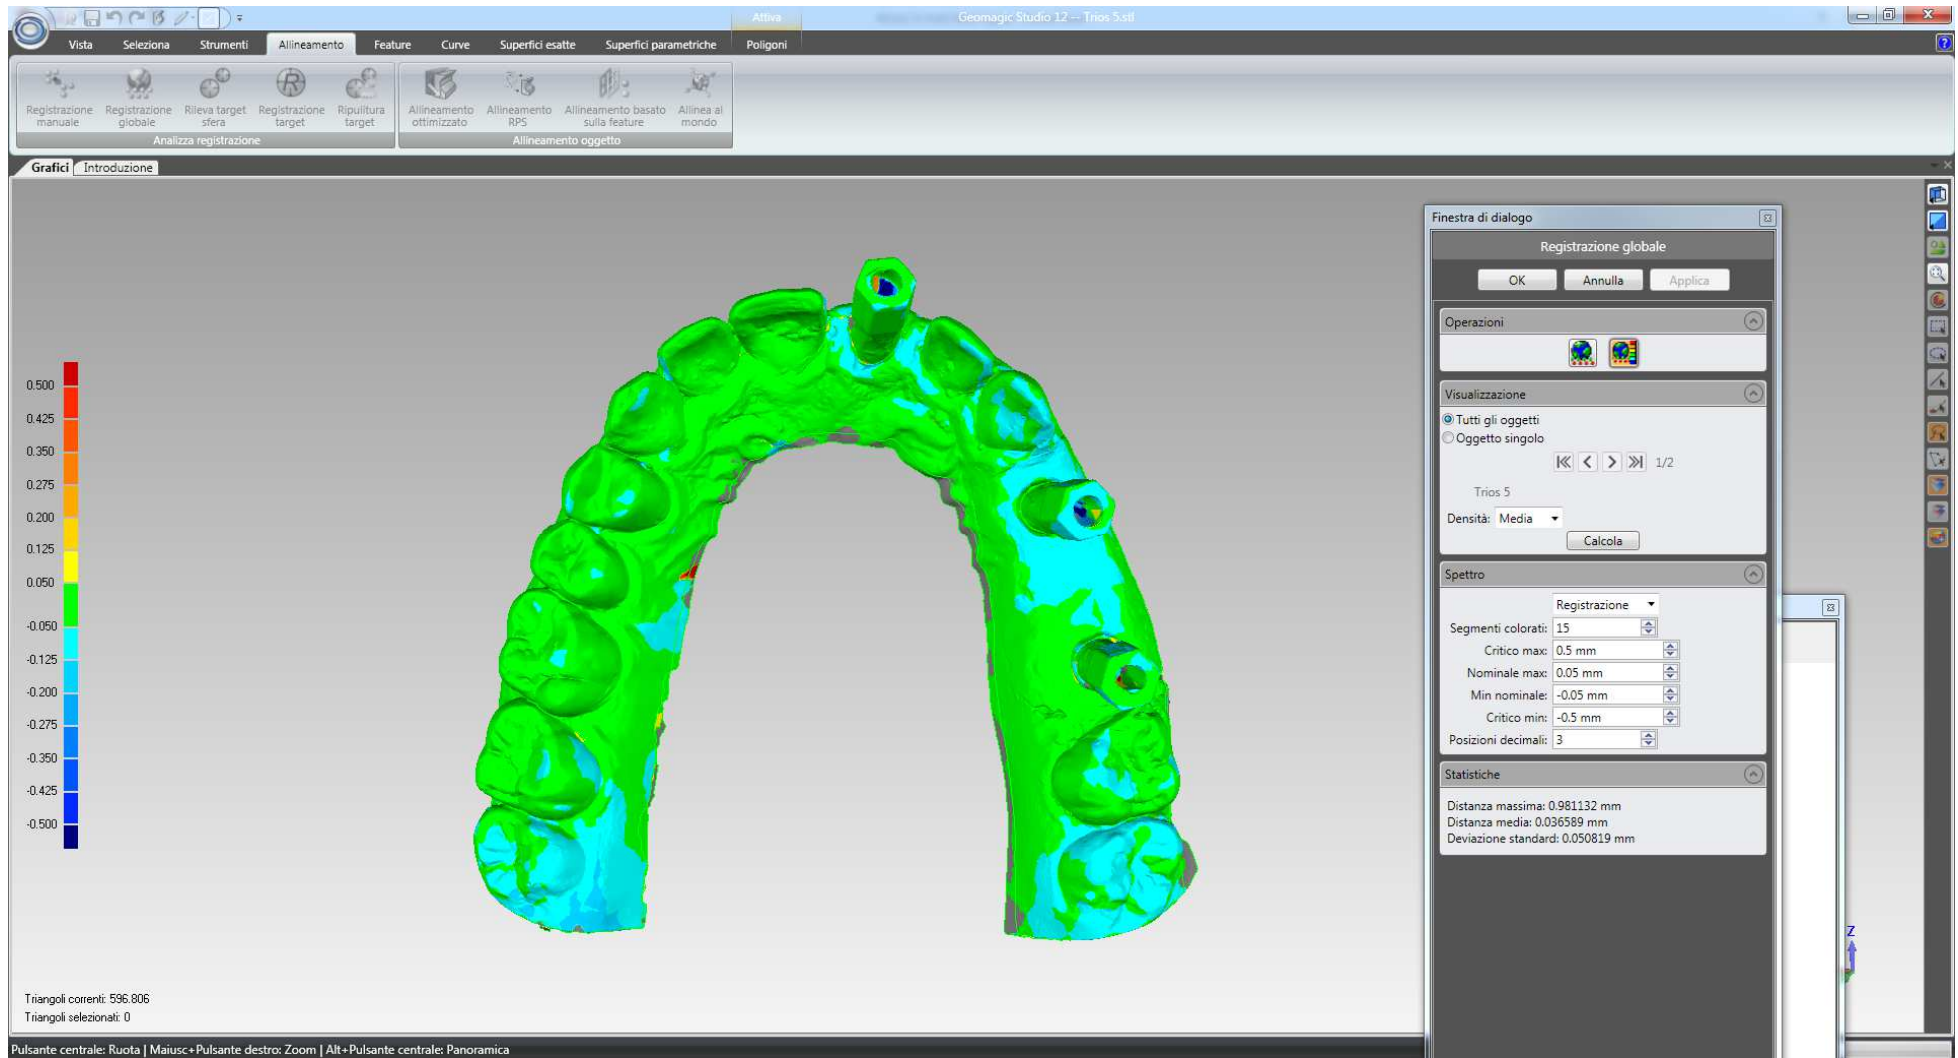

## Trios 5 as reference (best accuracy) vs trios 4

The screenshot displays the Geomagic Studio 12 interface. The main window shows a 3D model of a dental arch with a registration error map. The error map is color-coded, with a legend on the left ranging from -0.500 mm (blue) to 0.500 mm (red). The model is primarily green, indicating low error, with some blue and yellow areas. The software interface includes a menu bar (Vista, Selezione, Strumenti, Allineamento, Feature, Curve, Superfici esatte, Superfici parametriche, Poligoni) and a toolbar with various registration and alignment tools. A dialog box titled "Finestra di dialogo" is open on the right, showing the "Registrazione globale" settings. The "Operazioni" section shows two registration icons. The "Visualizzazione" section has "Tutti gli oggetti" selected. The "Spettro" section shows "Registrazione" selected, with "Segmenti colorati" set to 15. The "Statistiche" section displays the following data:

| Statistiche                      |
|----------------------------------|
| Distanza massima: 0.981132 mm    |
| Distanza media: 0.036589 mm      |
| Deviazione standard: 0.050819 mm |

At the bottom left, the status bar indicates "Triangoli correnti: 596.806" and "Triangoli selezionati: 0". The bottom of the window contains navigation instructions: "Pulsante centrale: Ruota | Maiusc+Pulsante destro: Zoom | Alt+Pulsante centrale: Panoramica".

# Trios 2 vs trios 4

Geomagic Studio 12 -- Trios 2.stl

Vista Selezione Strumenti **Allineamento** Feature Curve Superfici esatte Superfici parametriche Poligoni

Registrazione manuale Registrazione globale Rileva target sfera Registrazione target Ripulitura target Analizza registrazione

Allineamento ottimizzato Allineamento RPS Allineamento basato sulla feature Allinea al mondo Allineamento oggetto

Grafici Introduzione

0.500  
0.425  
0.350  
0.275  
0.200  
0.125  
0.050  
-0.050  
-0.125  
-0.200  
-0.275  
-0.350  
-0.425  
-0.500

Trios 2

Densità: Media

Calcola

Registrazione

Segmenti colorati: 15

Critico max: 0.5 mm

Nominale max: 0.05 mm

Min nominale: -0.05 mm

Critico min: -0.5 mm

Posizioni decimali: 3

Statistiche

Distanza massima: 0.923545 mm  
Distanza media: 0.069509 mm  
Deviazione standard: 0.070359 mm

Triangoli corenti: 565.590  
Triangoli selezionati: 0

Pulsante centrale: Ruota | Maiusc+Pulsante destro: Zoom | Alt+Pulsante centrale: Panoramica

# Trios 2 vs trios 4

The screenshot displays the Geomagic Studio 12 interface. The main window shows a 3D model of a mechanical part with a registration error map. A color scale on the left indicates the error range from -0.500 (blue) to 0.500 (red). The registration error map shows the model is mostly green and cyan, indicating low error, with some yellow and orange areas. The dialog box 'Registrazione globale' is open, showing the following statistics:

| Statistica          | Valore      |
|---------------------|-------------|
| Distanza massima    | 0.923545 mm |
| Distanza media      | 0.069509 mm |
| Deviazione standard | 0.070359 mm |

Additional information in the dialog box includes: Segmenti colorati: 15, Critico max: 0.5 mm, Nominale max: 0.05 mm, Min nominale: -0.05 mm, Critico min: -0.5 mm, and Posizioni decimali: 3.

Triangoli correnti: 565.590  
Triangoli selezionati: 0

Pulsante centrale: Ruota | Maiusc+Pulsante destro: Zoom | Alt+Pulsante centrale: Panoramica



TRIOS overall general precision in the partially edentulous model

|              | Mean distance | SD    | Maximum distance |
|--------------|---------------|-------|------------------|
| Trios 5 vs 1 | 0.028         | 0.044 | 0.959            |
| Trios 5 vs 2 | 0.068         | 0.068 | 0.916            |
| Trios 5 vs 3 | 0.054         | 0.061 | 0.981            |
| Trios 5 vs 4 | 0.036         | 0.050 | 0.981            |
| Trios 2 vs 4 | 0.069         | 0.070 | 0.923            |

**Overall Trios general precision: 0.051 (0.018)**

# Zfx 5 as reference (best accuracy) vs Zfx 1

The screenshot displays the Geomagic Studio 12 interface. The main window shows a 3D model of a dental arch with a color-coded registration error map. The error scale ranges from -0.500 mm (blue) to 0.500 mm (red). The model is primarily blue and green, indicating low registration error. A dialog box titled "Finestra di dialogo" is open on the right, showing registration statistics for "Mht 5".

**Finestra di dialogo**

Registrazione globale

OK Annulla Applica

Operazioni:

Visualizzazione

Tutti gli oggetti  
 Oggetto singolo

Mht 5

Densità: Media

Calcola

Spettro

Registrazione

Segmenti colorati: 15

Critico max: 0.5 mm

Nominale max: 0.05 mm

Min nominale: -0.05 mm

Critico min: -0.5 mm

Posizioni decimali: 3

Statistiche

Distanza massima: 0.989635 mm  
Distanza media: 0.139868 mm  
Deviazione standard: 0.167695 mm

Triangoli corenti: 601.136  
Triangoli selezionati: 0

Pulsante centrale: Ruota | Maiusc+Pulsante destro: Zoom | Alt+Pulsante centrale: Panoramica

19:05  
30/12/2015

# Zfx 5 as reference (best accuracy) vs Zfx 1

The screenshot displays the Geomagic Studio 12 interface. The main window shows a 3D model of a hand with a color-coded registration error map. The error scale ranges from -0.500 to 0.500 mm. The color scale is as follows:

| Error (mm) | Color          |
|------------|----------------|
| 0.500      | Red            |
| 0.425      | Orange         |
| 0.360      | Yellow         |
| 0.275      | Light Green    |
| 0.200      | Green          |
| 0.125      | Light Blue     |
| 0.050      | Blue           |
| -0.050     | Dark Blue      |
| -0.125     | Very Dark Blue |
| -0.200     | Black          |
| -0.275     | Dark Grey      |
| -0.360     | Medium Grey    |
| -0.425     | Light Grey     |
| -0.500     | White          |

The registration error map shows the hand model with various colors indicating the magnitude of the error. The error is generally low, with some higher values (yellow and orange) visible on the fingers and wrist area.

The dialog box titled "Finestra di dialogo" is open, showing the "Registrazione globale" settings. The "Operazioni" section shows two registration operations. The "Visualizzazione" section is set to "Tutti gli oggetti". The "Mht 5" dropdown is selected, and the "Densità" is set to "Media". The "Calcola" button is visible.

The "Spettro" section shows the following settings:

| Property           | Value    |
|--------------------|----------|
| Segmenti colorati  | 15       |
| Critico max        | 0.5 mm   |
| Nominale max       | 0.05 mm  |
| Min nominale       | -0.05 mm |
| Critico min        | -0.5 mm  |
| Posizioni decimali | 3        |

The "Statistiche" section shows the following statistics:

| Statistic           | Value       |
|---------------------|-------------|
| Distanza massima    | 0.989635 mm |
| Distanza media      | 0.139868 mm |
| Deviazione standard | 0.167695 mm |

The bottom status bar shows the following information:

Triangoli correnti: 601.136  
Triangoli selezionati: 0  
Pulsante centrale: Ruota | Maiusc+Pulsante destro: Zoom | Alt+Pulsante centrale: Panoramica

The system tray at the bottom right shows the date and time: 19:06 30/12/2015.

## Zfx 5 as reference (best accuracy) vs Zfx 2

The screenshot displays the Geomagic Studio 12 interface. The main window shows a 3D model of a dental arch with a color-coded registration error map. The error scale ranges from -0.500 mm (blue) to 0.500 mm (red). The model is primarily blue and green, indicating low error, with some yellow and orange areas. A dialog box titled "Finestra di dialogo" is open on the right, showing registration statistics for "Registrazione globale".

**Finestra di dialogo**  
Registrazione globale

OK Annulla Applica

Operazioni

Visualizzazione

Tutti gli oggetti  
 Oggetto singolo

1/2

Mht 5

Densità: Media

Calcola

Spettro

Registrazione

Segmenti colorati: 15

Critico max: 0.5 mm

Nominale max: 0.05 mm

Min nominale: -0.05 mm

Critico min: -0.5 mm

Posizioni decimali: 3

Statistiche

Distanza massima: 0.995844 mm  
Distanza media: 0.094278 mm  
Deviazione standard: 0.106800 mm

Triangoli correnti: 606.390  
Triangoli selezionati: 0

Pulsante centrale: Ruota | Maiusc+Pulsante destro: Zoom | Alt+Pulsante centrale: Panoramica

## Zfx 5 as reference (best accuracy) vs Zfx 2

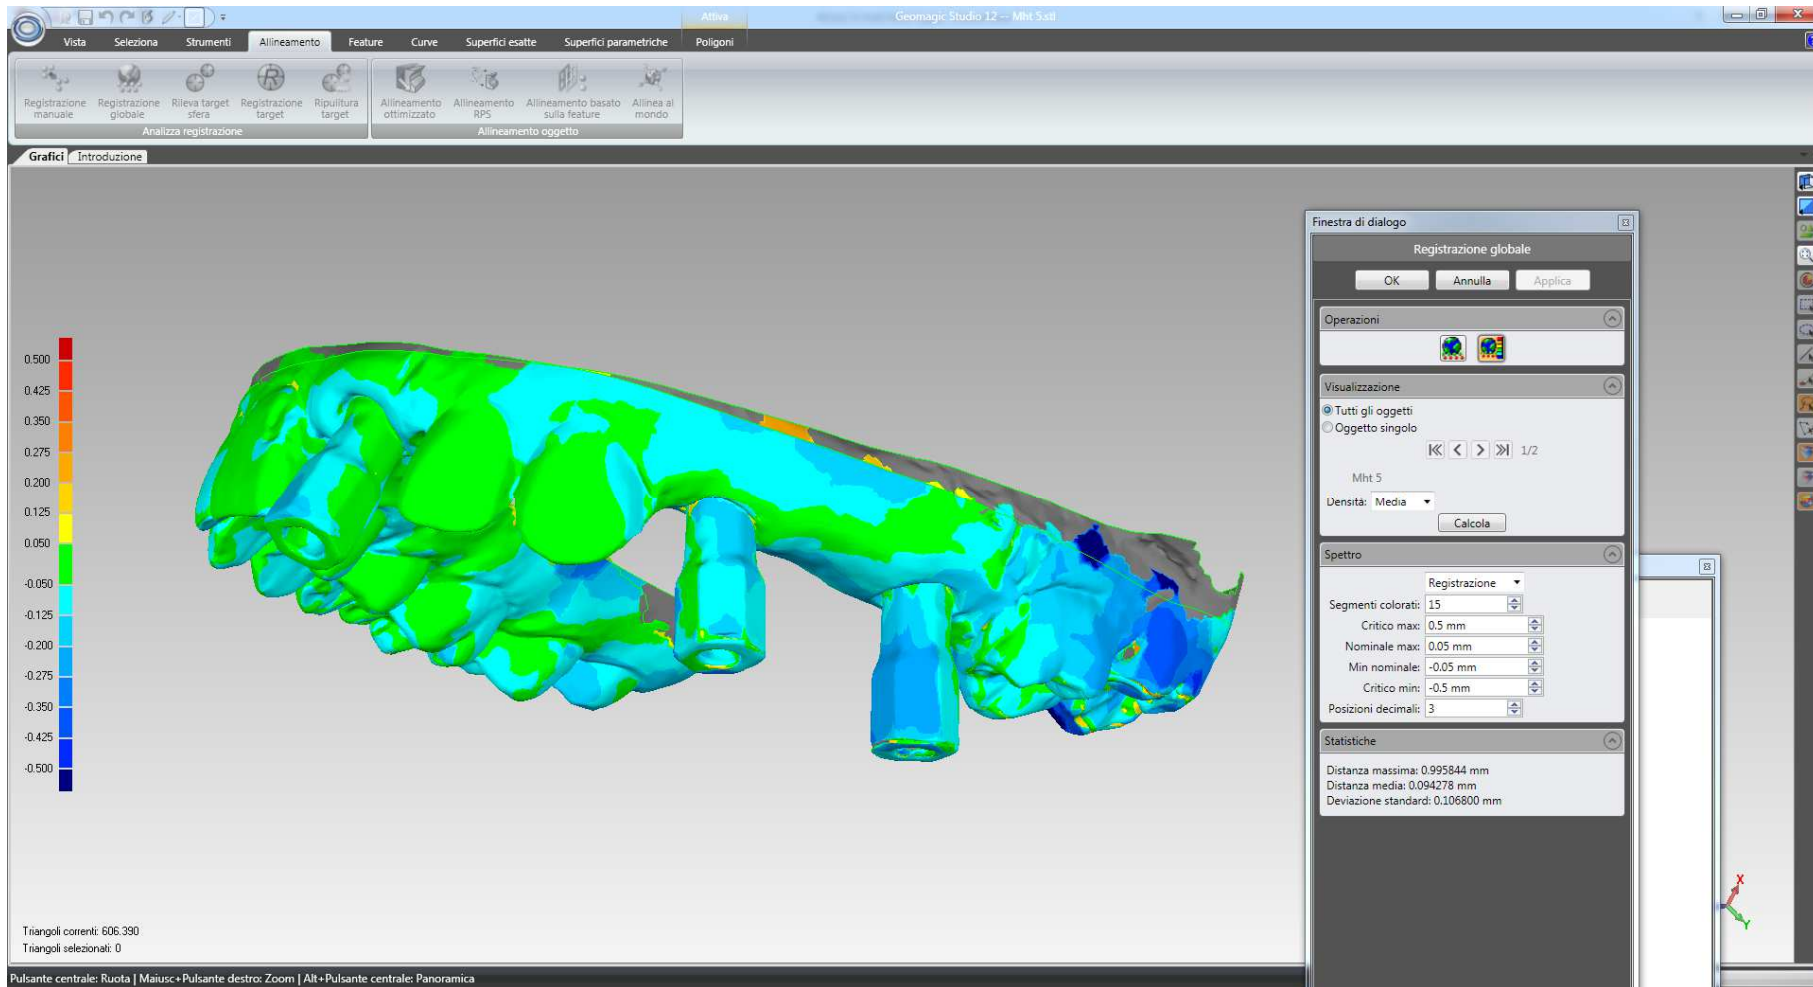

## Zfx 5 as reference (best accuracy) vs Zfx 3

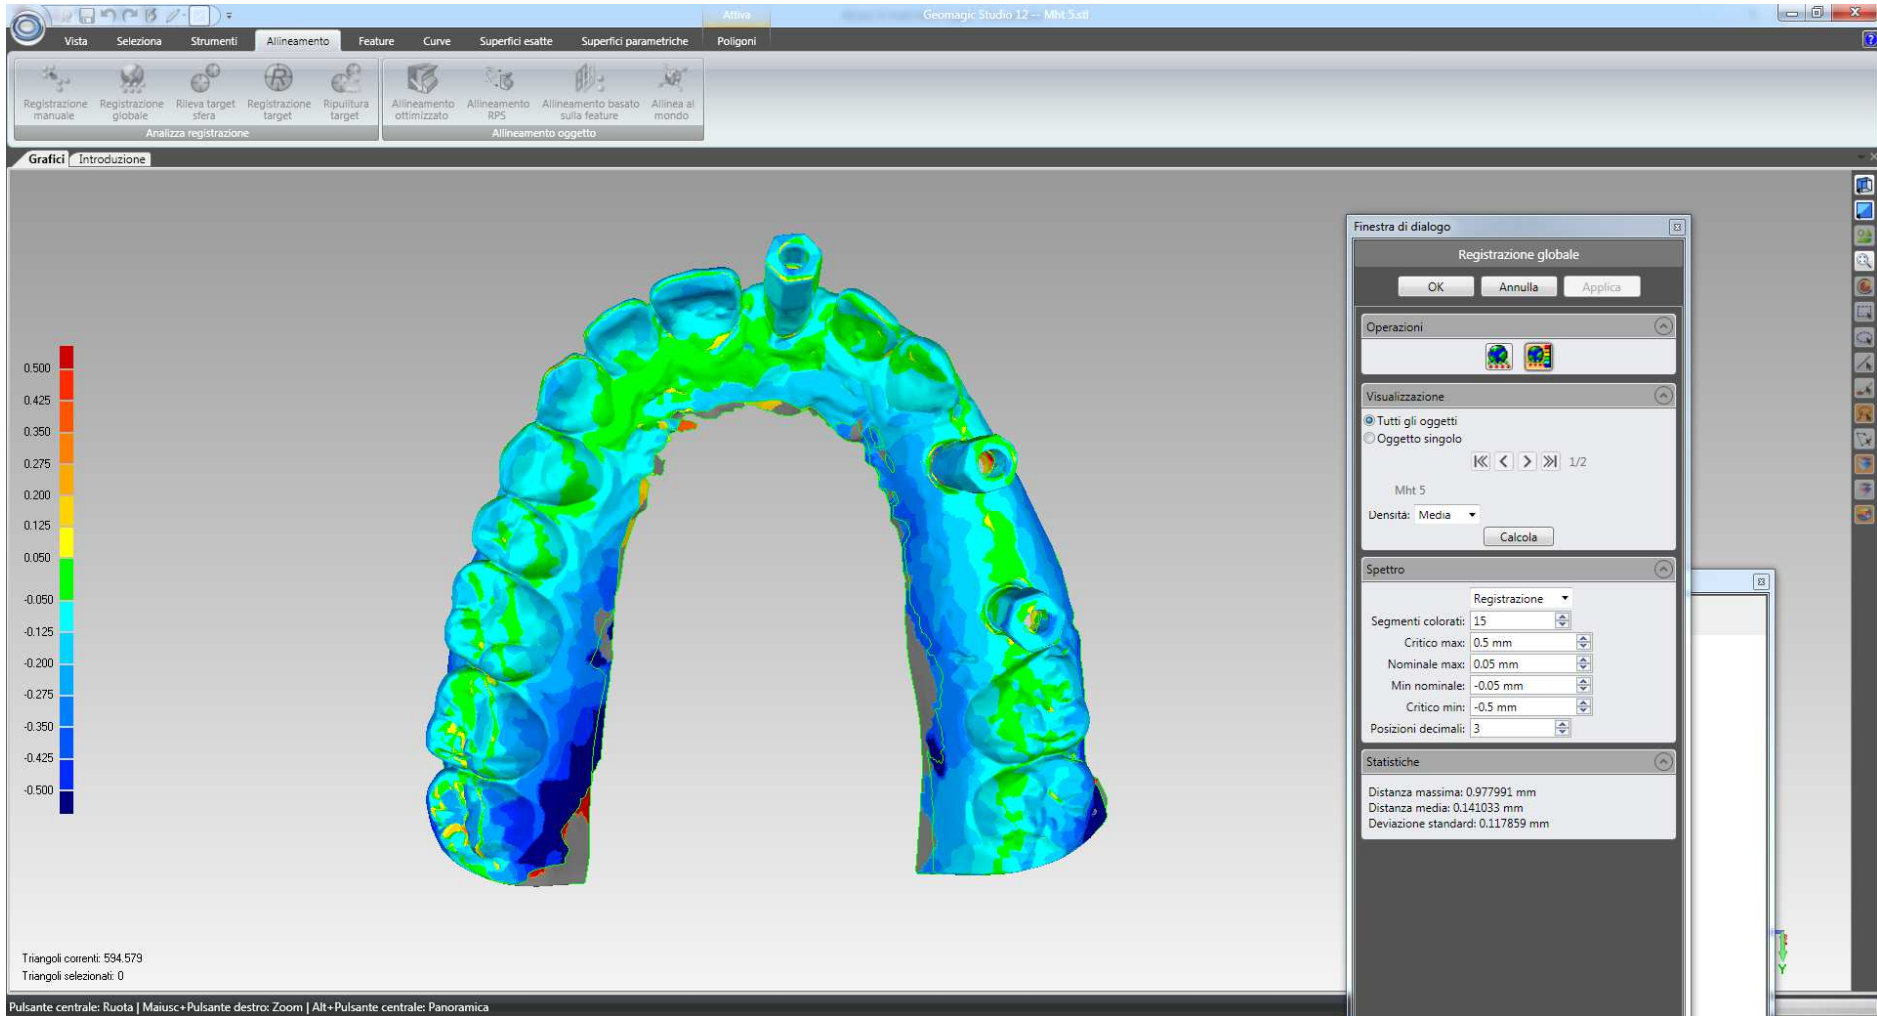

## Zfx 5 as reference (best accuracy) vs Zfx 3

The screenshot displays the Geomagic Studio 12 interface. The main window shows a 3D model of a mechanical part with a color-coded registration error map. The error scale ranges from -0.500 mm (blue) to 0.500 mm (red). The model is primarily blue and cyan, indicating low error, with some green and yellow areas. A vertical color scale legend is on the left side of the main window.

The dialog box on the right, titled "Finestra di dialogo", shows the "Registrazione globale" settings. The "Operazioni" section includes icons for registration. The "Visualizzazione" section shows "Tutti gli oggetti" selected. The "Mht 5" object is selected, and the "Densità" is set to "Media". The "Calcola" button is visible.

The "Spettro" section shows the following settings:

- Registrazione
- Segmenti colorati: 15
- Critico max: 0.5 mm
- Nominale max: 0.05 mm
- Min nominale: -0.05 mm
- Critico min: -0.5 mm
- Posizioni decimali: 3

The "Statistiche" section shows the following statistics:

- Distanza massima: 0.977991 mm
- Distanza media: 0.141033 mm
- Deviazione standard: 0.117859 mm

At the bottom left, the status bar shows:

- Triangoli correnti: 594.579
- Triangoli selezionati: 0

At the bottom center, the status bar shows:

Pulsante centrale: Ruota | Maiusc+Pulsante destro: Zoom | Alt+Pulsante centrale: Panoramica

## Zfx 5 as reference (best accuracy) vs Zfx 4

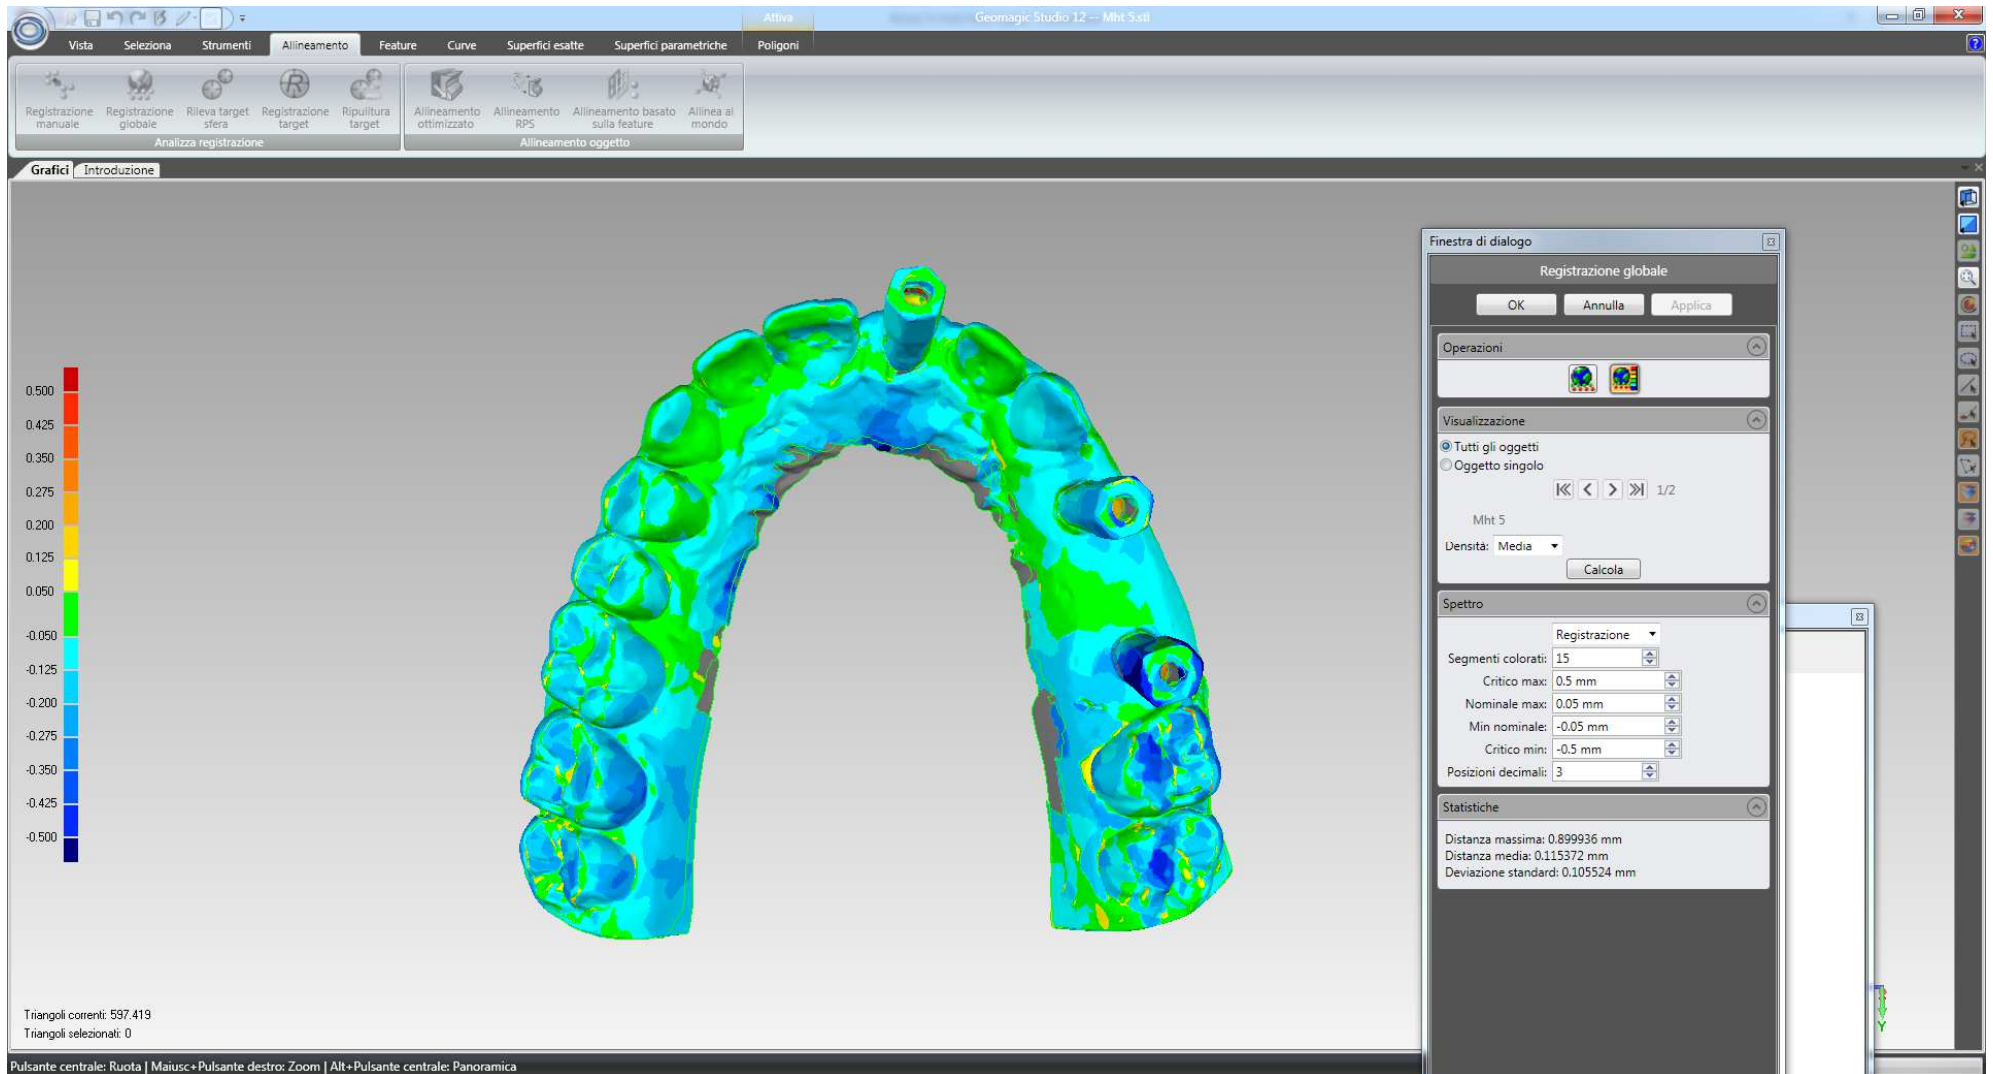



## Zfx 5 as reference (best accuracy) vs Zfx 4

The screenshot displays the Geomagic Studio 12 interface. The main window shows a 3D model of a hand with a color-coded registration error map. The error scale ranges from -0.500 to 0.500 mm. A dialog box on the right shows registration statistics:

| Statistiche          | Valore      |
|----------------------|-------------|
| Distanza massima:    | 0.899936 mm |
| Distanza media:      | 0.115372 mm |
| Deviazione standard: | 0.105524 mm |

The dialog box also shows the following settings:

- Operazioni:
- Visualizzazione:  Tutti gli oggetti,  Oggetto singolo
- Mht 5
- Densità: Media
- Calcola
- Spettro: Registrazione
- Segmenti colorati: 15
- Critico max: 0.5 mm
- Nominale max: 0.05 mm
- Min nominale: -0.05 mm
- Critico min: -0.5 mm
- Posizioni decimali: 3

At the bottom left, the status bar indicates: Triangoli correnti: 597.419, Triangoli selezionati: 0. The bottom of the screen shows the Windows taskbar with the system clock at 19:17 on 30/12/2015.

# Zfx 2 vs Zfx 4

The screenshot displays the Geomagic Studio 12 interface for a dental arch registration task. The main 3D view shows a dental arch with a color-coded registration overlay, ranging from -0.500 mm (dark blue) to 0.500 mm (dark red). The registration is performed on a model named 'Mht 2'. The 'Finestra di dialogo' (Dialog Box) for 'Registrazione globale' (Global Registration) is open, showing the following settings:

- Operazioni:** Global registration icons.
- Visualizzazione:**  Tutti gli oggetti,  Oggetto singolo. Navigation buttons:  $\ll$ ,  $\lt$ ,  $\gt$ ,  $\gg$ , 1/2.
- Mht 2:** Densità: Media.
- Spettro:** Registrazione dropdown. Segmenti colorati: 15. Critico max: 0.5 mm, Critico min: -0.5 mm, Min nominale: -0.05 mm, Nominale max: 0.05 mm. Posizioni decimali: 3.
- Statistiche:** Distanza massima: 0.920457 mm, Distanza media: 0.142203 mm, Deviazione standard: 0.134675 mm.

At the bottom left, the status bar indicates: Triangoli coerenti: 612.123, Triangoli selezionati: 0. The bottom of the window shows keyboard shortcuts: Pulsante centrale: Ruota | Maiusc+Pulsante destro: Zoom | Alt+Pulsante centrale: Panoramica.

# Zfx 2 vs Zfx 4

The screenshot displays the Geomagic Studio 12 interface. The main window shows a 3D model of a skull with a color-coded registration map. The color scale on the left ranges from -0.500 (dark blue) to 0.500 (dark red). The registration map shows the skull's surface with various colors indicating the registration quality. Two blue cylindrical objects are visible below the skull, likely representing registration targets or fixtures.

The software interface includes a menu bar with options: Vista, Selezione, Strumenti, Allineamento, Feature, Curve, Superfici esatte, Superfici parametriche, and Poligoni. The toolbar contains various registration tools: Registrazione manuale, Registrazione globale, Rileva target sfera, Registrazione target, Ripulitura target, Allineamento ottimizzato, Allineamento RPS, Allineamento basato sulla feature, and Allinea al mondo.

The 'Finestra di dialogo' (Dialog Window) is open, showing the 'Registrazione globale' (Global Registration) settings. The 'Operazioni' section includes icons for registration. The 'Visualizzazione' section has radio buttons for 'Tutti gli oggetti' (selected) and 'Oggetto singolo', along with navigation arrows and a '1/2' indicator. The 'Mht 2' section has a 'Densità: Media' dropdown and a 'Calcola' button. The 'Spettro' section has a 'Registrazione' dropdown, 'Segmenti colorati: 15', and fields for 'Critico max: 0.5 mm', 'Nominale max: 0.05 mm', 'Min nominale: -0.05 mm', 'Critico min: -0.5 mm', and 'Posizioni decimali: 3'. The 'Statistiche' section shows: 'Distanza massima: 0.920457 mm', 'Distanza media: 0.142203 mm', and 'Deviazione standard: 0.134675 mm'.

At the bottom left, the status bar indicates: 'Triangoli contenuti: 612.123' and 'Triangoli selezionati: 0'. The bottom center shows keyboard shortcuts: 'Pulsante centrale: Ruota | Maiusc+Pulsante destro: Zoom | Alt+Pulsante centrale: Panoramica'.

General precision of Zfx in the partially edentulous model

|                | Mean distance | SD    | Maximum distance |
|----------------|---------------|-------|------------------|
| Zfx 5 vs Zfx 1 | 0.139         | 0.167 | 0.989            |
| Zfx 5 vs Zfx 2 | 0.094         | 0.106 | 0.995            |
| Zfx 5 vs Zfx 3 | 0.141         | 0.117 | 0.977            |
| Zfx 5 vs Zfx 4 | 0.115         | 0.105 | 0.899            |
| Zfx 2 vs Zfx 4 | 0.142         | 0.134 | 0.920            |

**Overall Zfx general precision: 0.126 (0.021)**

## Care 2 as reference (best accuracy) vs Care 1

The screenshot displays the Geomagic Studio 12 interface. The main window shows a 3D model of a dental arch with a registration error map. The error map is color-coded, with green representing low error and red representing high error. The model is positioned in the center of the workspace. To the left of the model is a vertical color scale legend ranging from -0.500 to 0.500. Below the model, the text indicates "Triangoli correnti: 488.953" and "Triangoli selezionati: 0".

The right-hand side of the interface features a "Finestra di dialogo" (Dialog Window) titled "Registrazione globale" (Global Registration). This window contains several sections:

- Registrazione globale:** Includes "OK", "Annulla", and "Applica" buttons.
- Operazioni:** Shows icons for registration operations.
- Visualizzazione:** Includes radio buttons for "Tutti gli oggetti" (selected) and "Oggetto singolo". Navigation buttons and a page indicator "1/2" are also present.
- Spettro:** Contains a dropdown menu set to "Registrazione", a "Segmenti colorati" field set to 15, and input fields for "Critico max: 0.5 mm", "Nominale max: 0.05 mm", "Min nominale: -0.05 mm", "Critico min: -0.5 mm", and "Posizioni decimali: 3". A "Calcola" button is located below these fields.
- Statistiche:** Displays registration statistics: "Distanza massima: 0.988784 mm", "Distanza media: 0.041089 mm", and "Deviazione standard: 0.066541 mm".

At the bottom of the software window, a status bar provides keyboard shortcuts: "Pulsante centrale: Ruota | Maiusc+Pulsante destro: Zoom | Alt+Pulsante centrale: Panoramica".

# Care 2 as reference (best accuracy) vs Care 1

The screenshot displays the Geomagic Studio 12 interface for a dental arch model. The main window shows a 3D model with a color-coded registration error map. A vertical color scale on the left indicates error values from -0.500 mm (blue) to 0.500 mm (red). The model is primarily green, indicating low error, with some blue and yellow areas. A dialog box titled "Finestra di dialogo" is open on the right, showing registration statistics for "Registrazione globale".

**Finestra di dialogo - Registrazione globale**

OK Annulla Applica

Operazioni

Visualizzazione

Tutti gli oggetti  
 Oggetto singolo

Navigation icons: Home, Previous, Next, Refresh, 1/2

Carestream 2

Densità: Media

Calcola

Spettro

Registrazione

Segmenti colorati: 15

Critico max: 0.5 mm

Nominale max: 0.05 mm

Min nominale: -0.05 mm

Critico min: -0.5 mm

Posizioni decimali: 3

Statistiche

Distanza massima: 0.988784 mm  
Distanza media: 0.041089 mm  
Deviazione standard: 0.066541 mm

Triangoli correnti: 488.953  
Triangoli selezionati: 0

Pulsante centrale: Ruota | Maiusc+Pulsante destro: Zoom | Alt+Pulsante centrale: Panoramica

## Care 2 as reference (best accuracy) vs Care 3

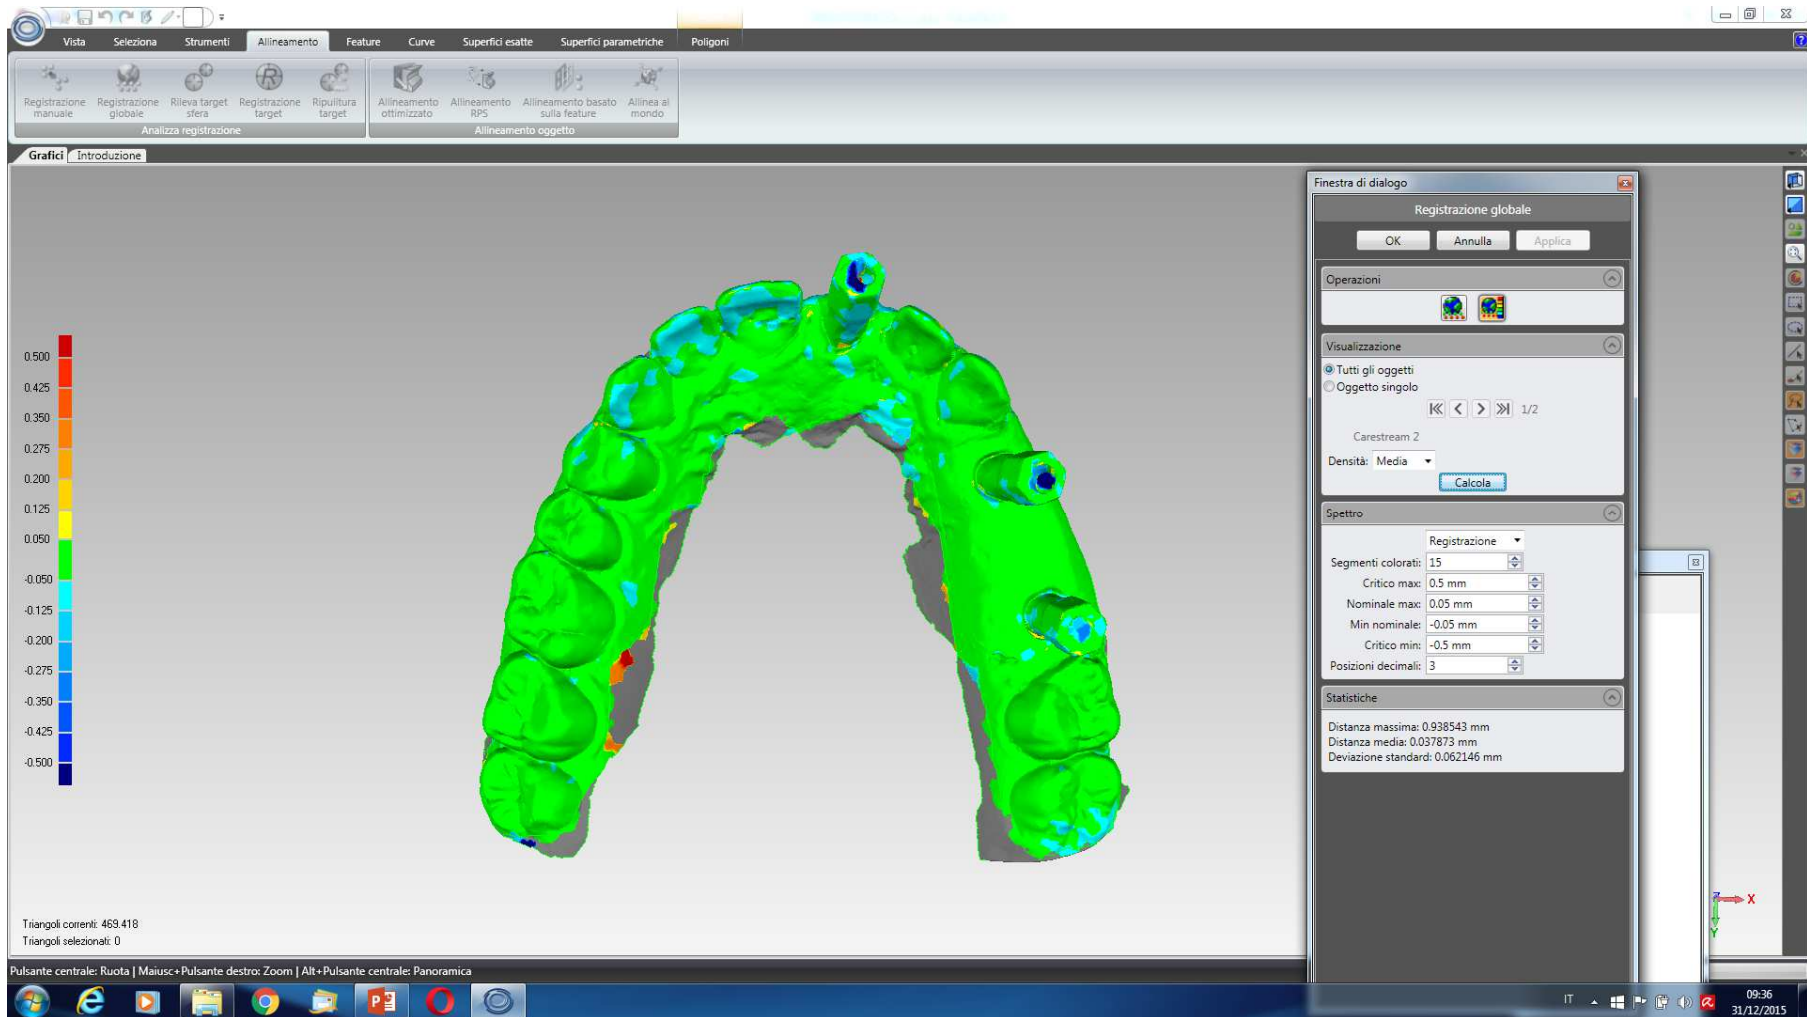

## Care 2 as reference (best accuracy) vs Care 3

Geomagic Studio 12 -- Carestream 2.stl

Vista Selezione Strumenti Allineamento Feature Curve Superfici esatte Superfici parametriche Poligoni

Registrazione manuale Registrazione globale Rileva target sfera Registrazione target Ripulitura target

Analizza registrazione

Allineamento ottimizzato Allineamento RPS Allineamento basato sulla feature Allinea al mondo

Allineamento oggetto

Grafici Introduzione

0.500  
0.425  
0.350  
0.275  
0.200  
0.125  
0.050  
-0.050  
-0.125  
-0.200  
-0.275  
-0.350  
-0.425  
-0.500

Triangoli corenti: 469.418  
Triangoli selezionati: 0

Pulsante centrale: Ruota | Maiusc+Pulsante destro: Zoom | Alt+Pulsante centrale: Panoramica

Finestra di dialogo

Registrazione globale

OK Annulla Applica

Operazioni

Visualizzazione

Tutti gli oggetti  
 Oggetto singolo

«» «» 1/2

Carestream 2

Densità: Media

Calcola

Spettro

Registrazione

Segmenti colorati: 15

Critico max: 0.5 mm

Nominale max: 0.05 mm

Min nominale: -0.05 mm

Critico min: -0.5 mm

Posizioni decimali: 3

Statistiche

Distanza massima: 0.938543 mm  
Distanza media: 0.037873 mm  
Deviazione standard: 0.062146 mm

Z  
X



## Care 2 as reference (best accuracy) vs Care 4

The screenshot displays the Geomagic Studio 12 interface. The main 3D view shows a dental arch model with a color-coded registration overlay. A vertical color scale on the left indicates the registration error, ranging from -0.500 (dark blue) to 0.500 (dark red). The model is primarily green, indicating a registration error between -0.125 and 0.125 mm. The 'Finestra di dialogo' (Dialog Window) on the right is titled 'Registrazione globale' and contains the following settings:

- Operazioni:** Includes icons for registration and alignment.
- Visualizzazione:** Shows 'Tutti gli oggetti' selected, with 'Carestream 2' as the active object. The density is set to 'Media'.
- Spettro:** Shows 'Registrazione' as the active spectrum. The number of colored segments is 15. The critical maximum is 0.5 mm, the nominal maximum is 0.05 mm, the nominal minimum is -0.05 mm, and the critical minimum is -0.5 mm. The number of decimal positions is 3.
- Statistiche:** Shows the following statistics:
  - Distanza massima: 1.000186 mm
  - Distanza media: 0.041154 mm
  - Deviazione standard: 0.056281 mm

At the bottom of the interface, the status bar indicates: 'Pulsante centrale: Ruota | Maiusc+Pulsante destro: Zoom | Alt+Pulsante centrale: Panoramica'. The main 3D view also displays the number of triangles: 'Triangoli coreniti: 468.475' and 'Triangoli selezionati: 0'.

## Care 2 as reference (best accuracy) vs Care 4

The screenshot displays the Geomagic Studio 12 interface. The main window shows a 3D model of a mechanical part with a color-coded registration error map. The color scale on the left ranges from -0.500 (dark blue) to 0.500 (dark red). The model is primarily green, indicating low error, with some blue and red areas. The software interface includes a menu bar, a toolbar with registration tools, and a 'Finestra di dialogo' (Dialog Window) on the right with settings for global registration, visualization, and statistics.

**Finestra di dialogo**

Registrazione globale

OK Annulla Applica

Operazioni

Visualizzazione

Tutti gli oggetti  
 Oggetto singolo

Navigation icons: Home, Previous, Next, Refresh, 1/2

Carestream 2

Densità: Media

Calcola

Spettro

Registrazione

Segmenti colorati: 15

Critico max: 0.5 mm

Nominale max: 0.05 mm

Min nominale: -0.05 mm

Critico min: -0.5 mm

Posizioni decimali: 3

Statistiche

Distanza massima: 1.000186 mm  
Distanza media: 0.041154 mm  
Deviazione standard: 0.056281 mm

Triangoli correnti: 468.475  
Triangoli selezionati: 0

Pulsante centrale: Ruota | Maiusc+Pulsante destro: Zoom | Alt+Pulsante centrale: Panoramica

## Care 2 as reference (best accuracy) vs Care 5

The screenshot displays the Geomagic Studio 12 interface. The main window shows a 3D model of a dental arch with a color-coded registration error map. The error scale ranges from -0.500 mm (blue) to 0.500 mm (red). The model is primarily green, indicating low error, with some blue and yellow areas. A dialog box titled "Finestra di dialogo" is open on the right, showing registration statistics for "Carestream 2".

**Finestra di dialogo**

Registrazione globale

OK Annulla Applica

Operazioni

Visualizzazione

Tutti gli oggetti  
 Oggetto singolo

Navigation icons: Home, Left, Right, 1/2

Carestream 2

Densità: Media

Calcola

Spettro

Registrazione

Segmenti colorati: 15

Critico max: 0.5 mm

Nominale max: 0.05 mm

Min nominale: -0.05 mm

Critico min: -0.5 mm

Posizioni decimali: 3

Statistiche

Distanza massima: 0.990079 mm  
Distanza media: 0.034305 mm  
Deviazione standard: 0.066860 mm

Triangoli correnti: 488.783  
Triangoli selezionati: 0

Pulsante centrale: Ruota | Maiusc+Pulsante destro: Zoom | Alt+Pulsante centrale: Panoramica

09:43  
31/12/2015

## Care 2 as reference (best accuracy) vs Care 5

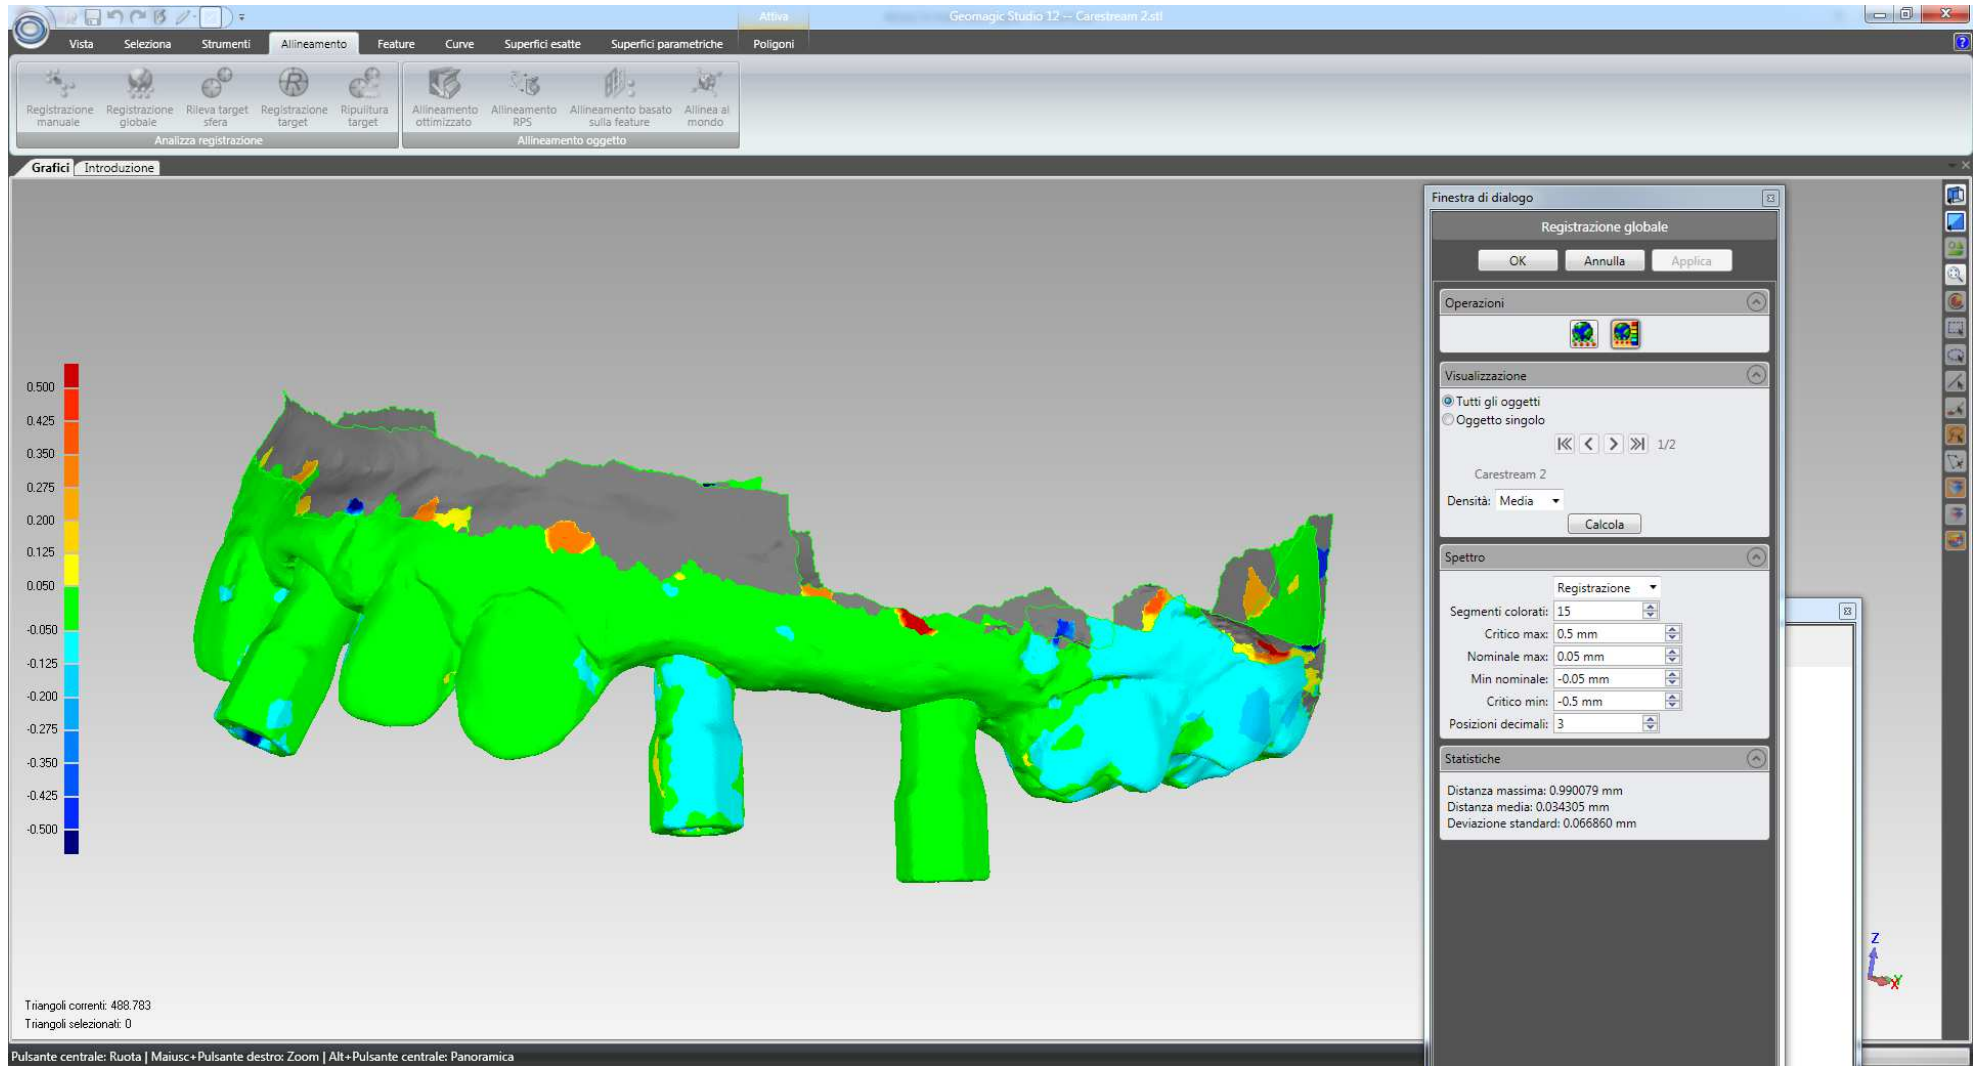

# Care 1 vs Care 3

The screenshot displays the Geomagic Studio 12 interface for a dental arch model. The main window shows a 3D model of a dental arch with a color-coded registration overlay. A vertical color scale on the left indicates the registration error, ranging from -0.500 (blue) to 0.500 (red). The model is primarily green, with blue and red areas indicating registration differences.

The **Finestra di dialogo** (Dialog Box) is open, showing the **Registrazione globale** (Global Registration) settings. The **Operazioni** (Operations) section shows the registration process. The **Visualizzazione** (Visualization) section shows the registration mode set to **Tutti gli oggetti** (All objects) and the density set to **Media** (Average). The **Spettro** (Spectrum) section shows the registration parameters: **Segmenti colorati** (Colored segments) set to 13, **Critico max** (Critical max) set to 0.5 mm, **Nominale max** (Nominal max) set to 0.05 mm, **Min nominale** (Min nominal) set to -0.05 mm, **Critico min** (Critical min) set to -0.5 mm, and **Posizioni decimali** (Decimal positions) set to 3.

The **Statistiche** (Statistics) section shows the registration results: **Distanza massima** (Maximum distance) is 0.999525 mm, **Distanza media** (Average distance) is 0.051303 mm, and **Deviazione standard** (Standard deviation) is 0.078695 mm.

At the bottom left, the status bar indicates: **Triangoli correnti** (Current triangles): 475.491, **Triangoli selezionati** (Selected triangles): 0.

The Windows taskbar at the bottom shows the system clock at 09:47 on 31/12/2015.

# Care 1 vs Care 3

The image shows the Geomagic Studio 12 interface with a 3D model of a hand. The model is color-coded to show registration errors. A vertical color scale on the left indicates the error range from -0.500 mm (dark blue) to 0.500 mm (dark red). The model shows a mix of green, cyan, and yellow, indicating moderate registration errors.

The 'Finestra di dialogo' (Dialog Box) is titled 'Registrazione globale' (Global Registration) and contains the following settings and statistics:

- Operazioni:** Two registration icons are visible.
- Visualizzazione:**  Tutti gli oggetti (All objects),  Oggetto singolo (Single object). Navigation buttons and '1/2' are present.
- Spettro:** **Registrazione** (Registration) dropdown menu. **Segmenti colorati:** 13. **Critico max:** 0.5 mm. **Nominale max:** 0.05 mm. **Min nominale:** -0.05 mm. **Critico min:** -0.5 mm. **Posizioni decimali:** 3.
- Statistiche:** Distanza massima: 0.999525 mm, Distanza media: 0.051303 mm, Deviazione standard: 0.078695 mm.

At the bottom left, the status bar shows: **Triangoli correnti:** 475.491, **Triangoli selezionati:** 0. The bottom of the window contains navigation instructions: **Pulsante centrale:** Ruota | **Maiusc+Pulsante destro:** Zoom | **Alt+Pulsante centrale:** Panoramica.

General precision Carestream in the partially edentulous model

|                  | Mean distance | SD    | Maximum distance |
|------------------|---------------|-------|------------------|
| Care 2 vs Care 1 | 0.041         | 0.066 | 0.988            |
| Care 2 vs Care 3 | 0.037         | 0.062 | 0.938            |
| Care 2 vs Care 4 | 0.041         | 0.056 | 1.000            |
| Care 2 vs Care 5 | 0.034         | 0.066 | 0.990            |
| Care 1 vs Care 3 | 0.051         | 0.078 | 0.998            |

**Overall Care general precision: 0.040 (0.006)**

## Plane 1 vs Plane 2

The screenshot displays the Geomagic Studio 12 interface. The main window shows a 3D model of a dental arch with a color-coded registration map. The color scale ranges from -0.500 (blue) to 0.500 (red). The registration map shows the difference between Plane 1 and Plane 2. The dialog box on the right, titled 'Finestra di dialogo', contains the following settings:

- Registrazione globale**
  - OK Annulla Applica
- Operazioni**
  - [Icons]
- Visualizzazione**
  - Tutti gli oggetti
  - Oggetto singolo
  - Planme 1
  - Densità: Media
  - Calcola
- Spettro**
  - Registrazione
  - Segmenti colorati: 15
  - Critico max: 0.5 mm
  - Nominale max: 0.05 mm
  - Min nominale: -0.05 mm
  - Critico min: -0.5 mm
  - Posizioni decimali: 3
- Statistiche**
  - Distanza massima: 1.013896 mm
  - Distanza media: 0.234633 mm
  - Deviazione standard: 0.225924 mm

Triangoli correnti: 874.361  
Triangoli selezionati: 0

Pulsante centrale: Ruota | Maiusc+Pulsante destro: Zoom | Alt+Pulsante centrale: Panoramica



# Plane 1 vs Plane 2

Geomagic Studio 12 -- Planne 1.stl

Vista Selezione Strumenti Allineamento Feature Curve Superfici esatte Superfici parametriche Poligoni

Registrazione manuale Registrazione globale Rileva target sfera Registrazione target Ripulitura target

Analizza registrazione

Allineamento ottimizzato Allineamento RPS Allineamento basato sulla feature Allinea al mondo

Allineamento oggetto

Grafici Introduzione

0.500  
0.425  
0.350  
0.275  
0.200  
0.125  
0.050  
-0.050  
-0.125  
-0.200  
-0.275  
-0.350  
-0.425  
-0.500

Triangoli correnti: 874.361  
Triangoli selezionati: 0

Pulsante centrale: Ruota | Maiusc+Pulsante destro: Zoom | Alt+Pulsante centrale: Panoramica

Finestra di dialogo

Registrazione globale

OK Annulla Applica

Operazioni

Visualizzazione

Tutti gli oggetti  
 Oggetto singolo

Planne 1

Densità: Media

Calcola

Spettro

Registrazione

Segmenti colorati: 15

Critico max: 0.5 mm

Nominale max: 0.05 mm

Min nominale: -0.05 mm

Critico min: -0.5 mm

Posizioni decimali: 3

Statistiche

Distanza massima: 1.013896 mm  
Distanza media: 0.234633 mm  
Deviazione standard: 0.225924 mm

IT 12:18 01/01/2016

# Plane 1 vs Plane 3

Geomagic Studio 12 -- Pianne 1.stl

Vista Selezione Strumenti Allineamento Feature Curve Superfici esatte Superfici parametriche Poligoni

Registrazione manuale Registrazione globale Rileva target sfera Registrazione target Ripulitura target Allineamento ottimizzato Allineamento RPS Allineamento basato sulla feature Allinea al mondo

Analizza registrazione Allineamento oggetto

Grafici Introduzione

0.500  
0.425  
0.350  
0.275  
0.200  
0.125  
0.050  
-0.050  
-0.125  
-0.200  
-0.275  
-0.350  
-0.425  
-0.500

Triangoli correnti: 851.258  
Triangoli selezionati: 0

Pulsante centrale: Ruota | Maiusc+Pulsante destro: Zoom | Alt+Pulsante centrale: Panoramica

Finestra di dialogo

Registrazione globale

OK Annulla Applica

Operazioni

Visualizzazione

Tutti gli oggetti  
 Oggetto singolo

Planne 1

Densità: Media

Calcola

Spettro

Registrazione

Segmenti colorati: 15

Critico max: 0.5 mm

Nominale max: 0.05 mm

Min nominale: -0.05 mm

Critico min: -0.5 mm

Posizioni decimali: 3

Statistiche

Distanza massima: 1.035244 mm  
Distanza media: 0.246364 mm  
Deviazione standard: 0.199712 mm

# Plane 1 vs Plane 3

The screenshot displays the Geomagic Studio 12 interface. The main window shows a 3D model of a mechanical part with a color-coded surface deviation map. The color scale on the left ranges from -0.500 mm (dark blue) to 0.500 mm (dark red). The model is primarily blue and green, indicating deviations between -0.250 mm and 0.250 mm. A dialog box titled "Finestra di dialogo" is open on the right, showing settings for "Registrazione globale" and "Spettro".

**Finestra di dialogo**

Registrazione globale

OK Annulla Applica

Operazioni

Visualizzazione

Tutti gli oggetti  
 Oggetto singolo

Planme 1

Densità: Media

Calcola

Spettro

Registrazione

Segmenti colorati: 15

Critico max: 0.5 mm

Nominale max: 0.05 mm

Min nominale: -0.05 mm

Critico min: -0.5 mm

Posizioni decimali: 3

Statistiche

Distanza massima: 1.035244 mm  
Distanza media: 0.246364 mm  
Deviazione standard: 0.199712 mm

Triangoli correnti: 851.258  
Triangoli selezionati: 0

Pulsante centrale: Ruota | Maiusc+Pulsante destro: Zoom | Alt+Pulsante centrale: Panoramica

# Plane 1 vs Plane 4

The screenshot displays the Geomagic Studio 12 interface. The main window shows a 3D model of a dental arch with a color-coded deviation map. The color scale on the left ranges from -0.500 (blue) to 0.500 (red). The software interface includes a menu bar with options like Vista, Selezione, Strumenti, Allineamento, Feature, Curve, Superfici esatte, Superfici parametriche, and Poligoni. A toolbar below the menu bar contains various registration and alignment tools. The 'Finestra di dialogo' (Dialog Box) for 'Registrazione globale' (Global Registration) is open on the right, showing settings for visualization and spectral analysis. The statistics section at the bottom of the dialog box displays the following data:

| Statistiche          |             |
|----------------------|-------------|
| Distanza massima:    | 1.039453 mm |
| Distanza media:      | 0.256397 mm |
| Deviazione standard: | 0.230646 mm |

Additional information at the bottom of the main window includes: Triangoli correnti: 841.657, Triangoli selezionati: 0, and keyboard shortcuts: Pulsante centrale: Ruota | Maiusc+Pulsante destro: Zoom | Alt+Pulsante centrale: Panoramica.

# Plane 1 vs Plane 4

The screenshot displays the Geomagic Studio 12 interface. The main window shows a 3D model of a hand with a color-coded registration map. A vertical color scale on the left ranges from -0.500 (blue) to 0.500 (red). The registration map shows the alignment of two planes, with the distance between them indicated by the color. The dialog box on the right, titled 'Finestra di dialogo', shows the following settings and statistics:

**Registrazione globale**

OK Annulla Applica

**Operazioni**

**Visualizzazione**

Tutti gli oggetti  
 Oggetto singolo

Planme 1

Densità: Media

Calcola

**Spettro**

Registrazione

Segmenti colorati: 15

Critico max: 0.5 mm

Nominale max: 0.05 mm

Min nominale: -0.05 mm

Critico min: -0.5 mm

Posizioni decimali: 3

**Statistiche**

Distanza massima: 1.039453 mm  
Distanza media: 0.256397 mm  
Deviazione standard: 0.230646 mm

Triangoli correnti: 841.657  
Triangoli selezionati: 0

Pulsante centrale: Ruota | Maiusc+Pulsante destro: Zoom | Alt+Pulsante centrale: Panoramica

12:29  
01/01/2016

# Plane 1 vs Plane 5

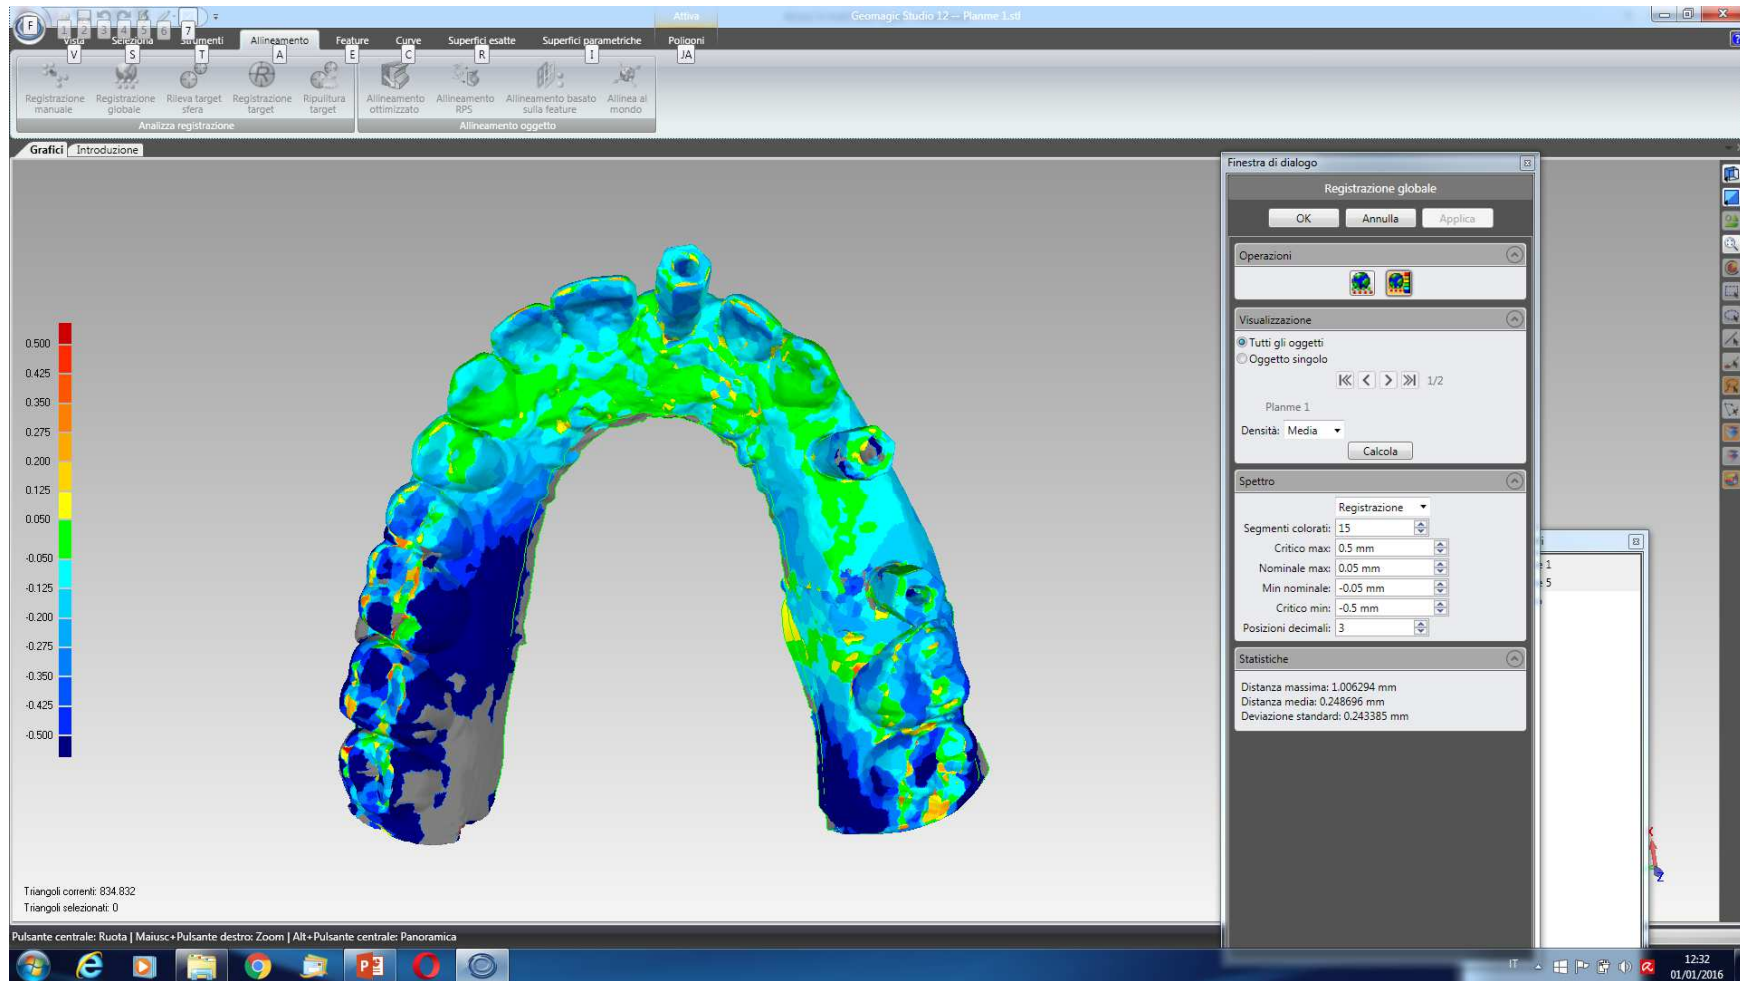

# Plane 1 vs Plane 5

The screenshot displays the Geomagic Studio 12 interface. The main window shows a 3D model of a mechanical part with a color-coded distance map. The color scale on the left ranges from -0.500 (dark blue) to 0.500 (dark red). The model is primarily blue and cyan, indicating small deviations, with some green and yellow areas. The interface includes a menu bar with options like 'Vista', 'Selezione', 'Strumenti', 'Allineamento', 'Feature', 'Curve', 'Superfici esatte', 'Superfici parametriche', and 'Poligoni'. A toolbar below the menu bar contains various registration and alignment tools. The 'Finestra di dialogo' (Dialog Box) on the right is titled 'Registrazione globale' and contains the following settings:

- Operazioni: [Icons]
- Visualizzazione:  Tutti gli oggetti,  Oggetto singolo
- Planme 1
- Densità: Media
- Calcola
- Spettro: Registrazione
- Segmenti colorati: 15
- Critico max: 0.5 mm
- Nominale max: 0.05 mm
- Min nominale: -0.05 mm
- Critico min: -0.5 mm
- Posizioni decimali: 3
- Statistiche: Distanza massima: 1.006294 mm, Distanza media: 0.248696 mm, Deviazione standard: 0.243385 mm

Triangoli correnti: 834.832  
Triangoli selezionati: 0

Pulsante centrale: Ruota | Maiusc+Pulsante destro: Zoom | Alt+Pulsante centrale: Panoramica

## Plane 2 vs Plane 4

The screenshot displays the Geomagic Studio 12 interface. The main window shows a 3D model of a dental arch with a color-coded registration map. The color scale on the left ranges from -0.500 (dark blue) to 0.500 (dark red). The registration map shows the alignment of two planes, with the difference between them represented by the color gradient.

The 'Finestra di dialogo' (Dialog Window) is open, showing the following settings:

- Registrazione globale** (Global Registration):
  - Buttons: OK, Annulla, Applica
  - Operazioni: [Icons]
  - Visualizzazione:  Tutti gli oggetti,  Oggetto singolo
  - Planne 2: [Navigation icons] 1/2
  - Densità: Media
  - Calcola
- Spettro** (Spectrum):
  - Registrazione: [Dropdown]
  - Segmenti colorati: 15
  - Critico max: 0.5 mm
  - Nominale max: 0.05 mm
  - Min nominale: -0.05 mm
  - Critico min: -0.5 mm
  - Posizioni decimali: 3
- Statistiche** (Statistics):
  - Distanza massima: 1.012705 mm
  - Distanza media: 0.115709 mm
  - Deviazione standard: 0.123956 mm

At the bottom left, the status bar shows: Triangoli correnti: 873.196, Triangoli selezionati: 0.

At the bottom, the keyboard shortcuts are: Pulsante centrale: Ruota | Maiusc+Pulsante destro: Zoom | Alt+Pulsante centrale: Panoramica



# Plane 2 vs Plane 4

Triangoli correnti: 879.196  
Triangoli selezionati: 0

Pulsante centrale: Ruota | Maiusc+Pulsante destro: Zoom | Alt+Pulsante centrale: Panoramica

Finestra di dialogo  
Registrazione globale

OK Annulla Applica

Operazioni

Visualizzazione

Tutti gli oggetti  
 Oggetto singolo

Planme.2  
Densità: Media

Calcola

Spettro

Registrazione

Segmenti colorati: 15  
Critico max: 0.5 mm  
Nominale max: 0.05 mm  
Min nominale: -0.05 mm  
Critico min: -0.5 mm  
Posizioni decimali: 3

Statistiche

Distanza massima: 1.012705 mm  
Distanza media: 0.115709 mm  
Deviazione standard: 0.123956 mm

General precision Planscan scanner in the partially edentulous model

|                  | Mean distance | SD    | Maximum distance |
|------------------|---------------|-------|------------------|
| Plan 1 vs Plan 2 | 0.234         | 0.225 | 1.013            |
| Plan 1 vs Plan 3 | 0.246         | 0.199 | 1.035            |
| Plan 1 vs Plan 4 | 0.256         | 0.230 | 1.039            |
| Plan 1 vs Plan 5 | 0.248         | 0.243 | 1.006            |
| Plan 2 vs Plan 4 | 0.115         | 0.123 | 1.014            |

**Overall Plan general precision: 0.219 (0.059)**

# OVERALL RESULTS OF GENERAL TRUENESS AND GENERAL PRECISION FOR THE FOUR DIFFERENT SCANNERS IN THE PARTIALLY EDENTULOUS MODEL

**Overall Carestream general accuracy: 0.047 (0.007)**

**Overall Trios general accuracy: 0.071 (0.019)**

**Overall Zfx general accuracy: 0.117 (0.028)**

**Overall Planscan general accuracy: 0.233 (0.062)**

**Overall Care general precision: 0.040 (0.006)**

**Overall Trios general precision: 0.051 (0.018)**

**Overall Zfx general precision: 0.126 (0.021)**

**Overall Planscan general precision: 0.219 (0.059)**

# OVERALL RESULTS OF LOCAL TRUENESS FOR THE FOUR DIFFERENT SCANNERS IN THE PARTIALLY EDENTULOUS MODEL

Mean error, local trueness, linear measurements

| Misure lineari | Trios   | Zfx     | Care    | Plan  |
|----------------|---------|---------|---------|-------|
| S1-S2          | - 0.004 | - 0.111 | 0.034   | 0.112 |
| S2-S3          | 0.061   | - 0.051 | 0.051   | 0.207 |
| S1-S3          | - 0.033 | - 0.155 | - 0.060 | 0.122 |

**Trios errore medio assoluto lineare: 0.032 (0.028)**  
**Carestream errore medio assoluto lineare: 0.048 (0.013)**  
**Zfx errore medio assoluto lineare: 0.105 (0.052)**  
**Planmeca errore medio assoluto lineare: 0.147 (0.052)**

Mean error, local trueness, angular measurements

|          | Trios   | Zfx   | Care | Plan  |
|----------|---------|-------|------|-------|
| S1-S2-S3 | - 0.33° | 0.82° | 0.09 | -0.8° |

**Carestream errore medio assoluto angolare: 0.09°**  
**Trios errore medio assoluto angolare: 0.33°**  
**Planmeca errore medio assoluto angolare: 0.8°**  
**Zfx errore medio assoluto angolare: 0.82°**

GENERAL TRUENESS EVALUATIONS FOR TRIOS, ZFX INTRASCAN, CARESTREAM, PLANSCAN (SCANS WERE RANDOM BUT HERE WE ORDERED THEM) IN THE TOTALLY EDENTULOUS MODEL

GENERAL SETTINGS FOR FINAL REGISTRATION (TRUENESS):

0.5 mm, 0.05 mm, -0.05 mm, -0.5 mm (see scale)

# TRIOS 1 vs REF (IMETRIC)

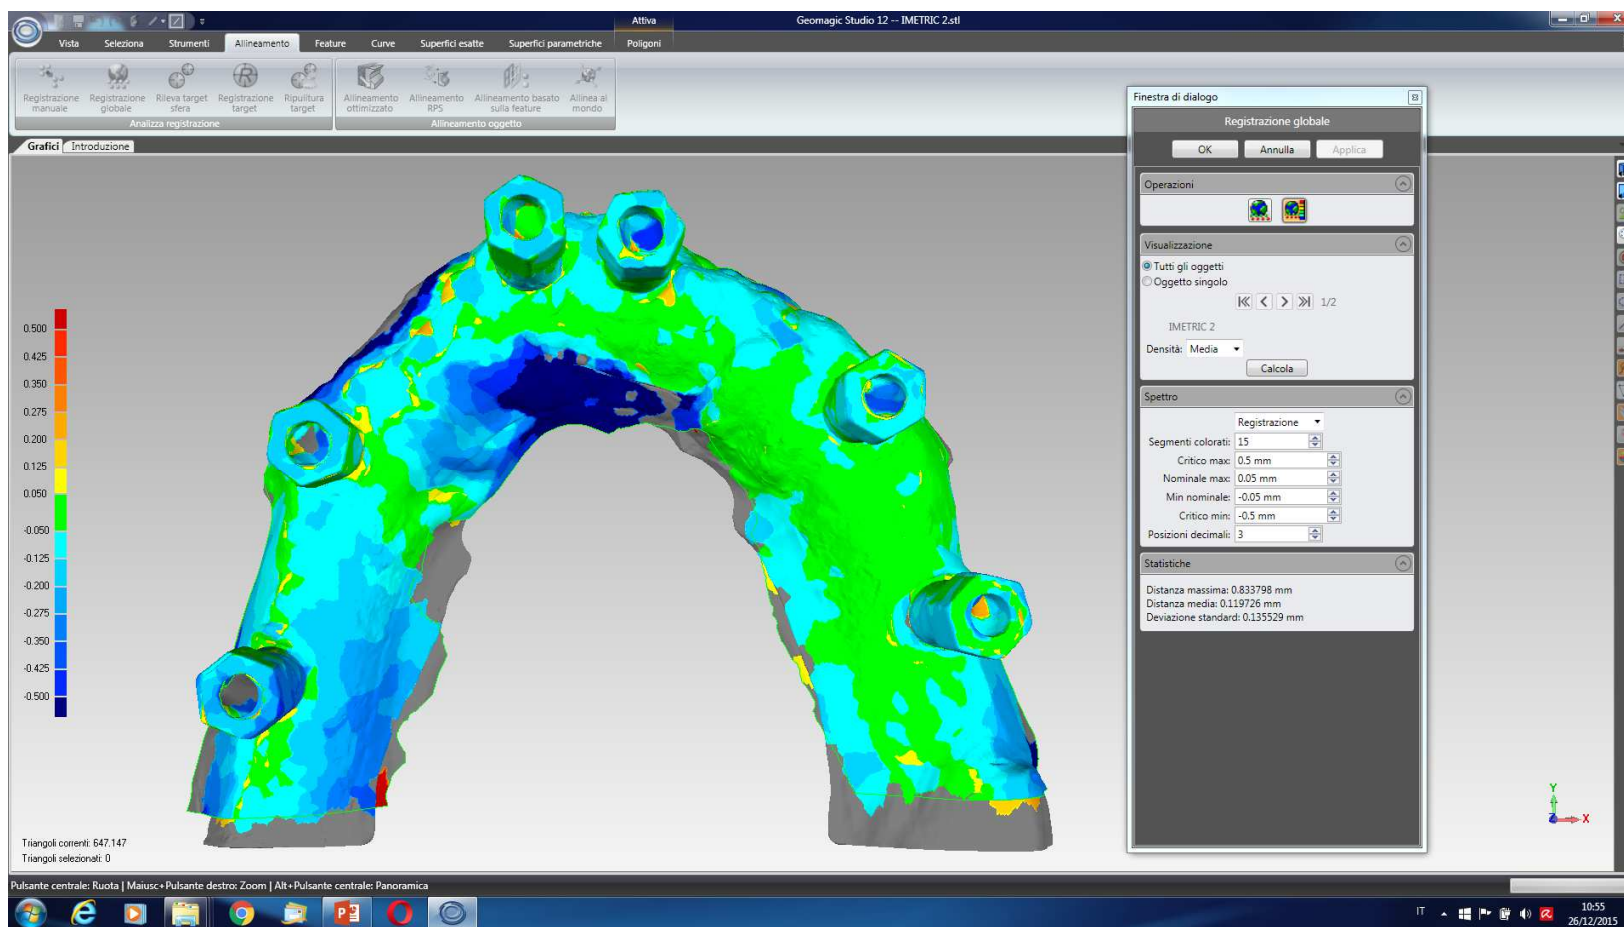

# TRIOS 1 vs REF (IMETRIC)

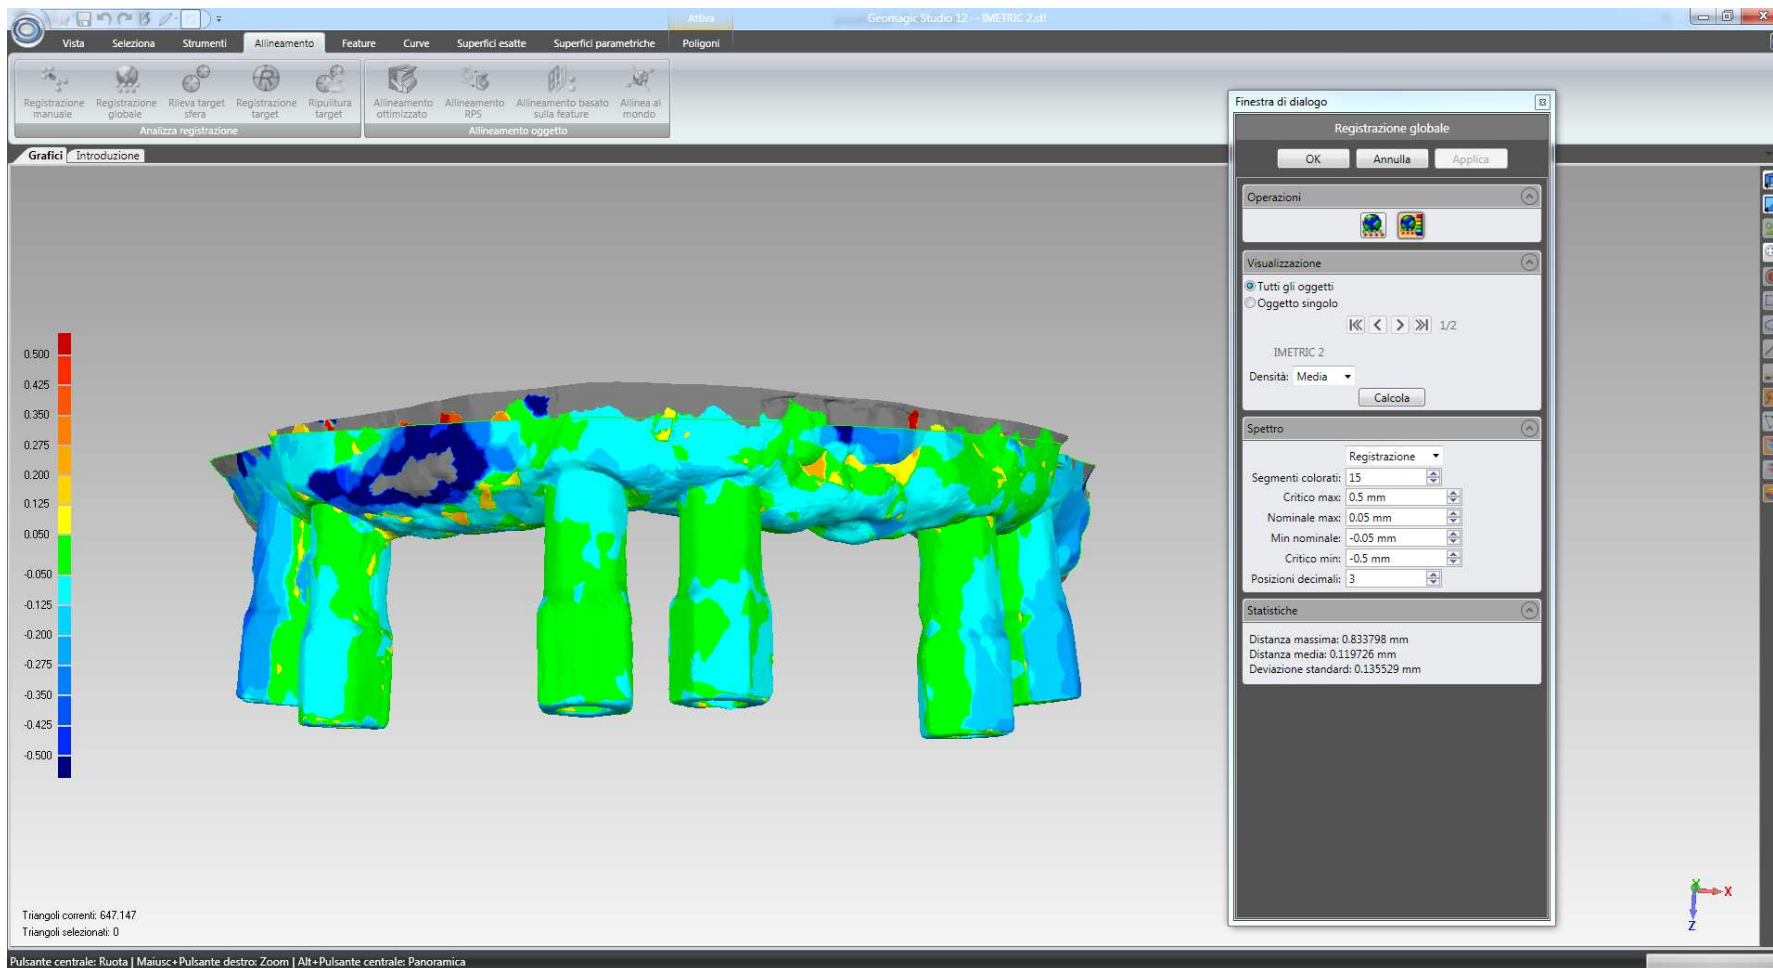

# TRIOS 1 vs REF (IMETRIC)

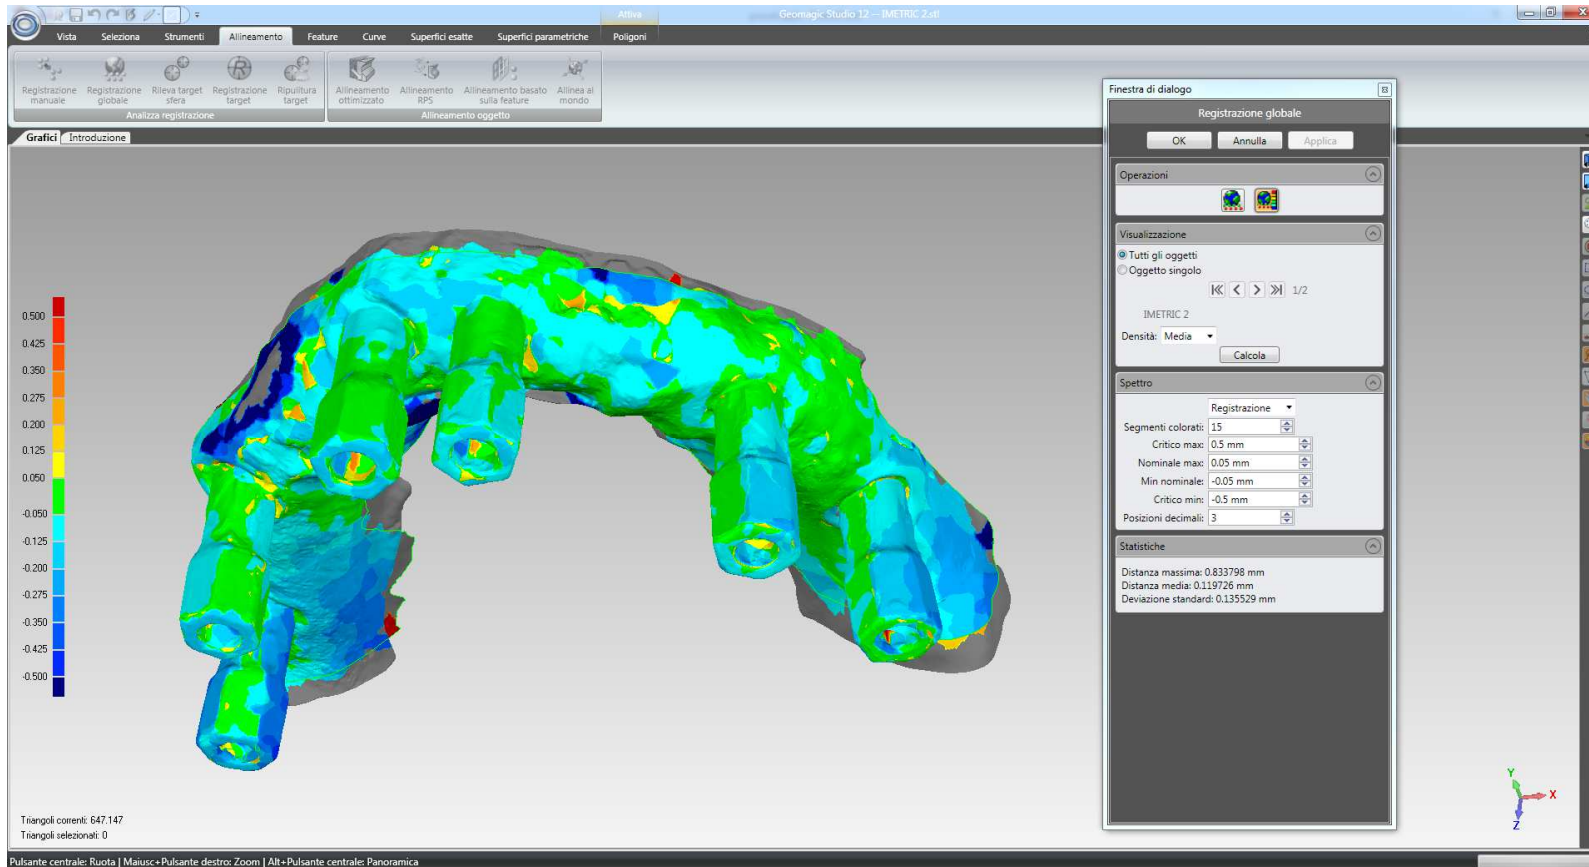



# TRIOS 1 vs REF (IMETRIC)

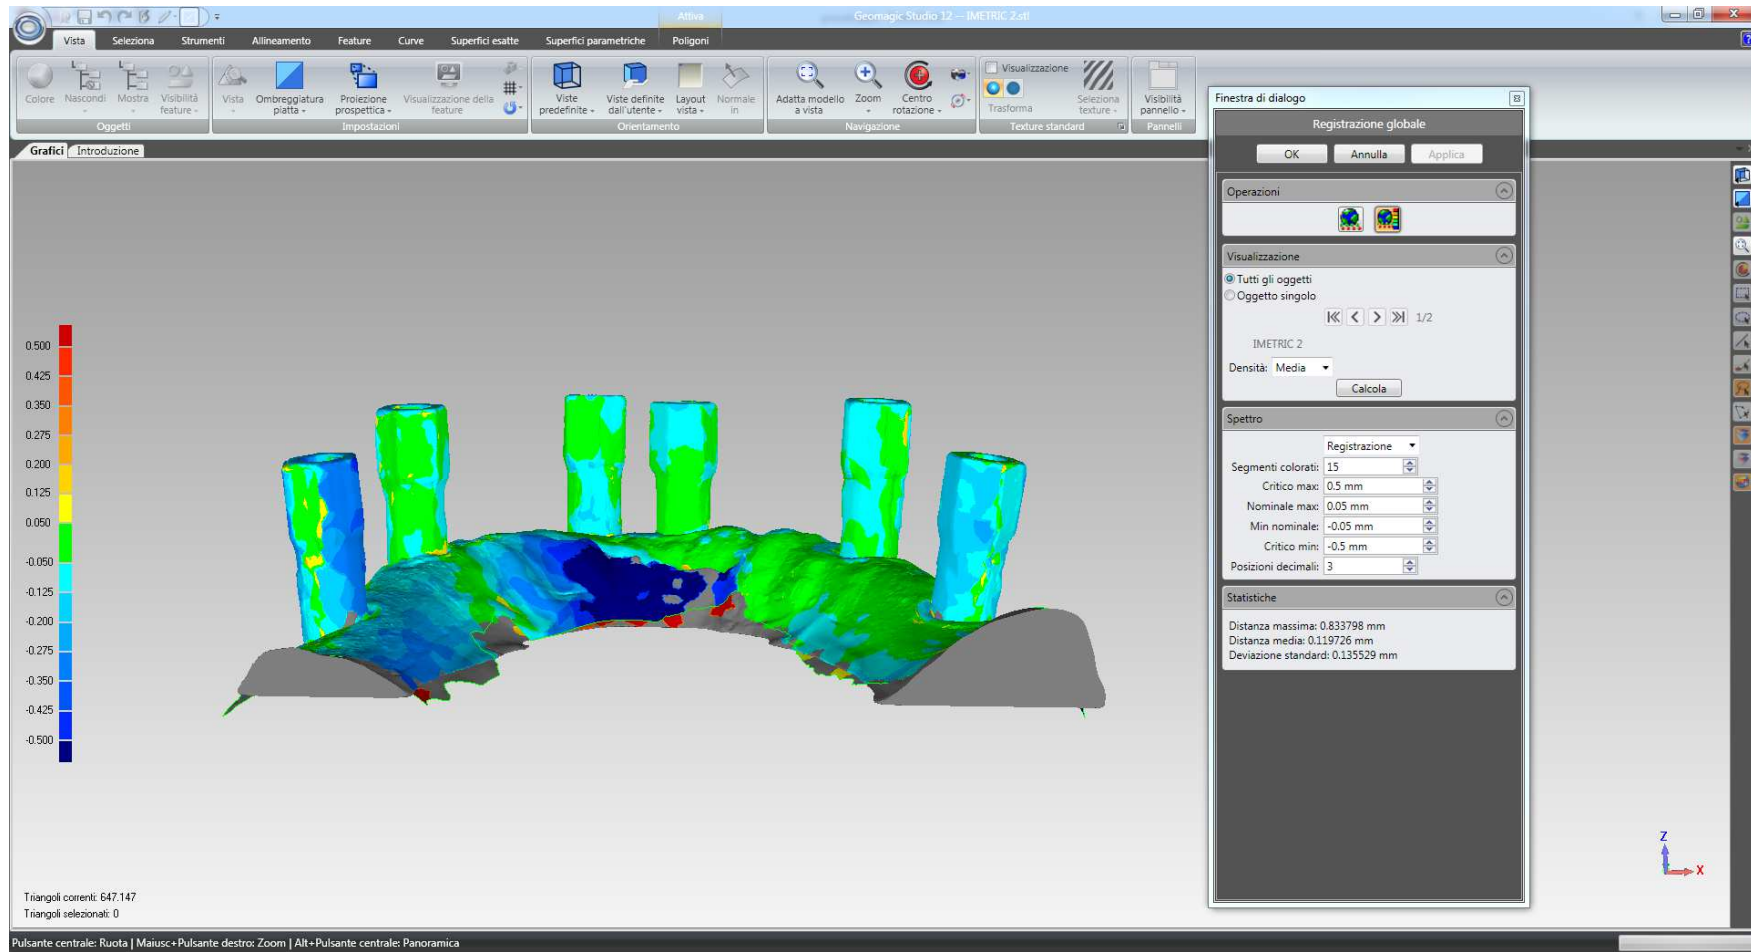

# TRIOS 2 vs REF (IMETRIC)

The screenshot displays the Geomagic Studio 12 interface. The main window shows a 3D model of a curved, arch-like part with a color-coded deviation map. The color scale on the left ranges from -0.500 (dark blue) to 0.500 (dark red). The model is primarily green and yellow, indicating deviations between 0.050 mm and 0.250 mm. The software interface includes a menu bar with options like 'Vista', 'Selezione', 'Strumenti', 'Allineamento', 'Feature', 'Curve', 'Superfici esatte', 'Superfici parametriche', and 'Poligoni'. A toolbar below the menu bar contains various registration and alignment tools. The 'Finestra di dialogo' (Dialog Box) for 'Registrazione globale' is open on the right, showing the following settings and statistics:

**Registrazione globale**

OK Annulla Applica

Operazioni

Visualizzazione

Tutti gli oggetti  
 Oggetto singolo

trios 2

Densità: Media

Calcola

Spettro

Registrazione

Segmenti colorati: 15

Critico max: 0.5 mm

Nominale max: 0.05 mm

Min nominale: -0.05 mm

Critico min: -0.5 mm

Posizioni decimali: 3

Statistiche

Distanza massima: 0.834094 mm  
Distanza media: 0.058965 mm  
Deviazione standard: 0.095992 mm

Triangoli correnti: 645,233  
Triangoli selezionati: 0

Pulsante centrale: Ruota | Maiusc+Pulsante destro: Zoom | Alt+Pulsante centrale: Panoramica

# TRIOS 2 vs REF (IMETRIC)

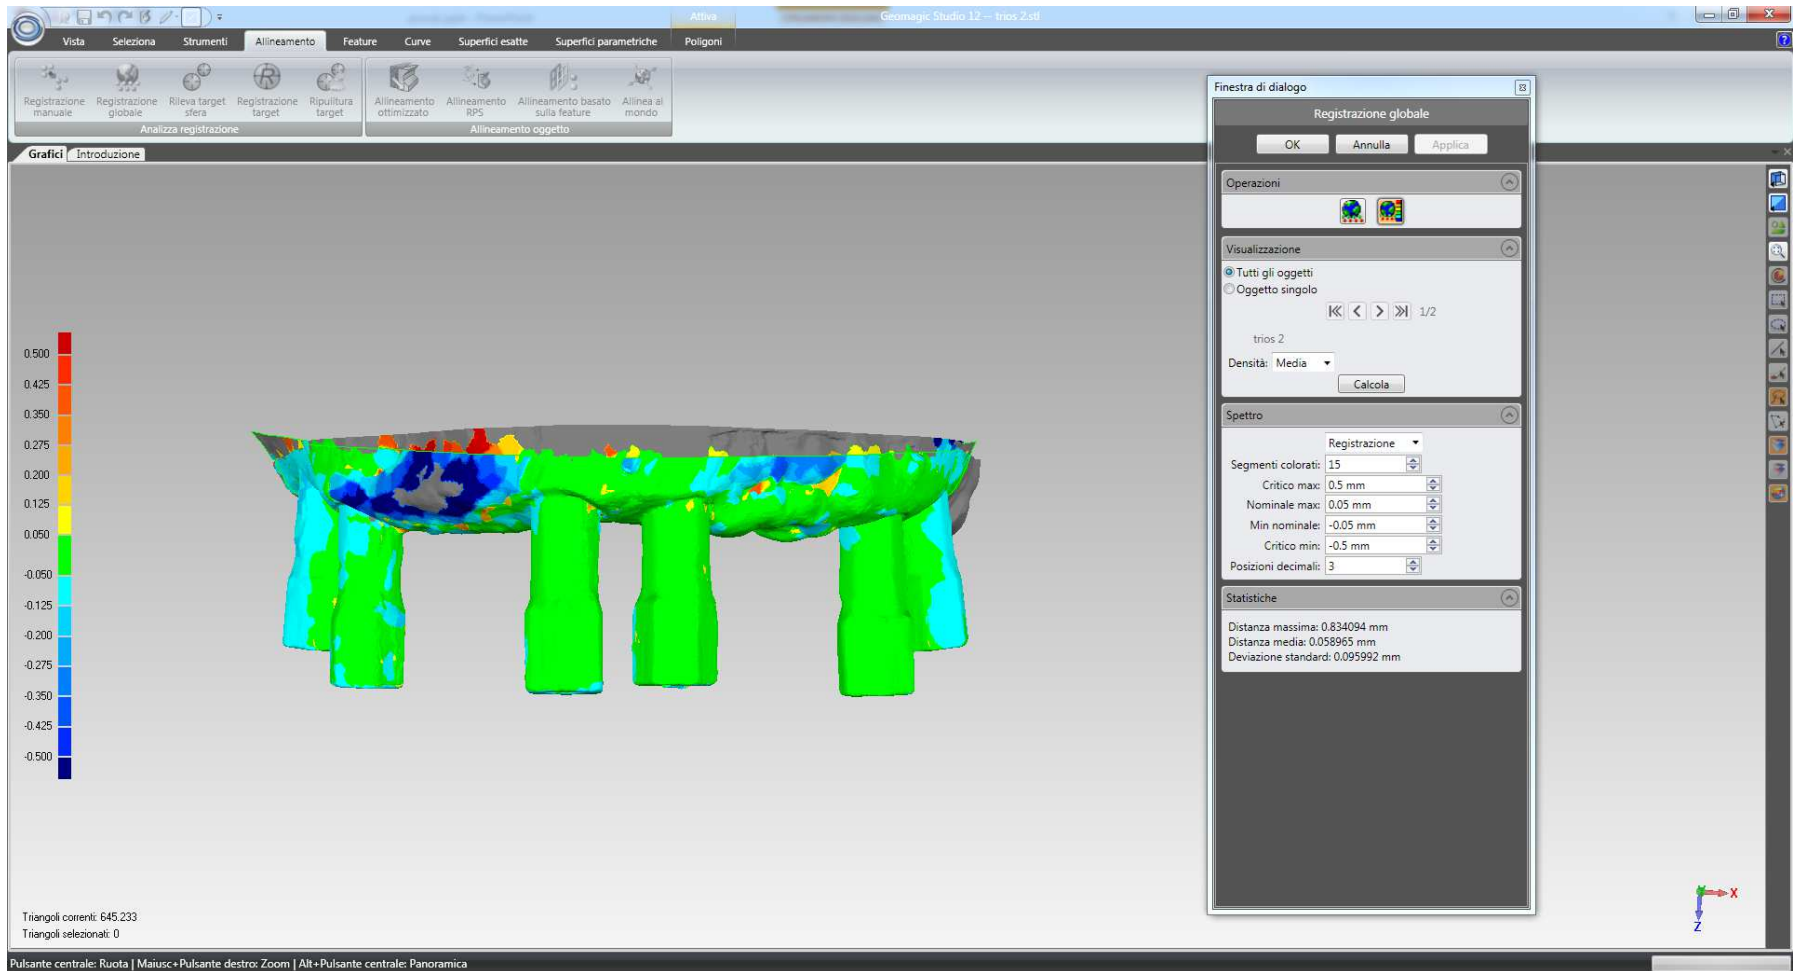

# TRIOS 2 vs REF (IMETRIC)

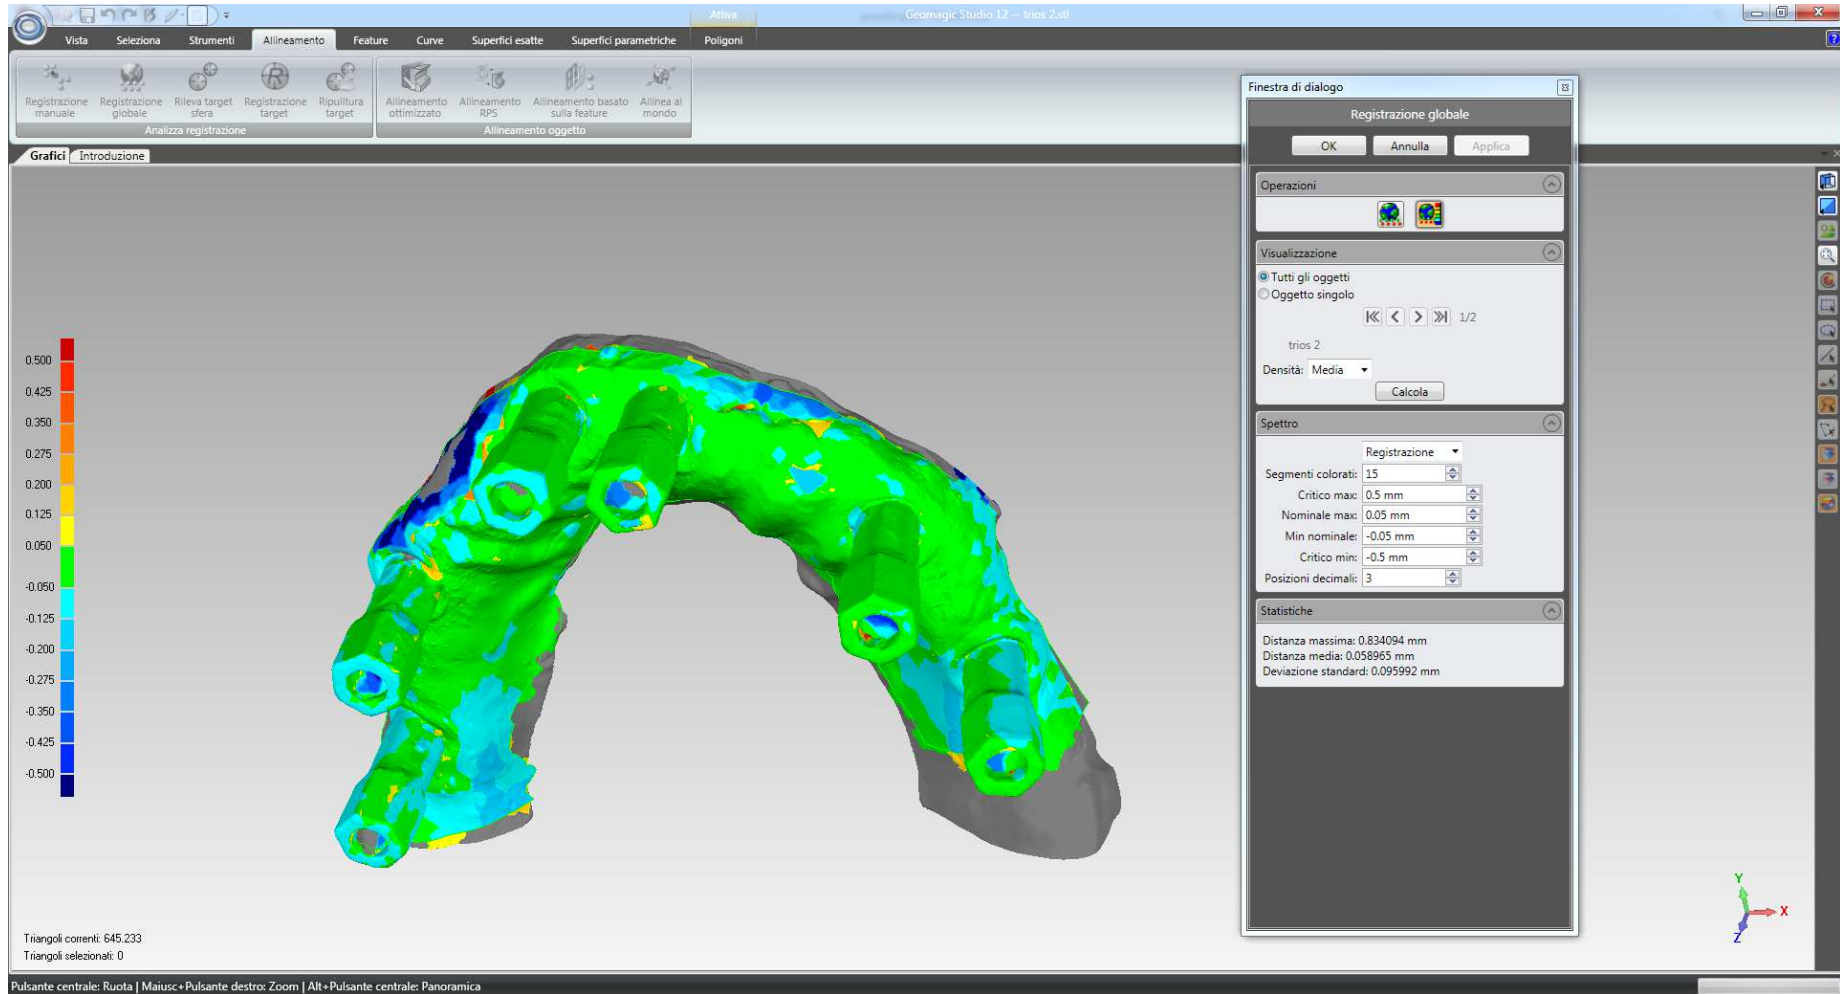

# TRIOS 2 vs REF (IMETRIC)

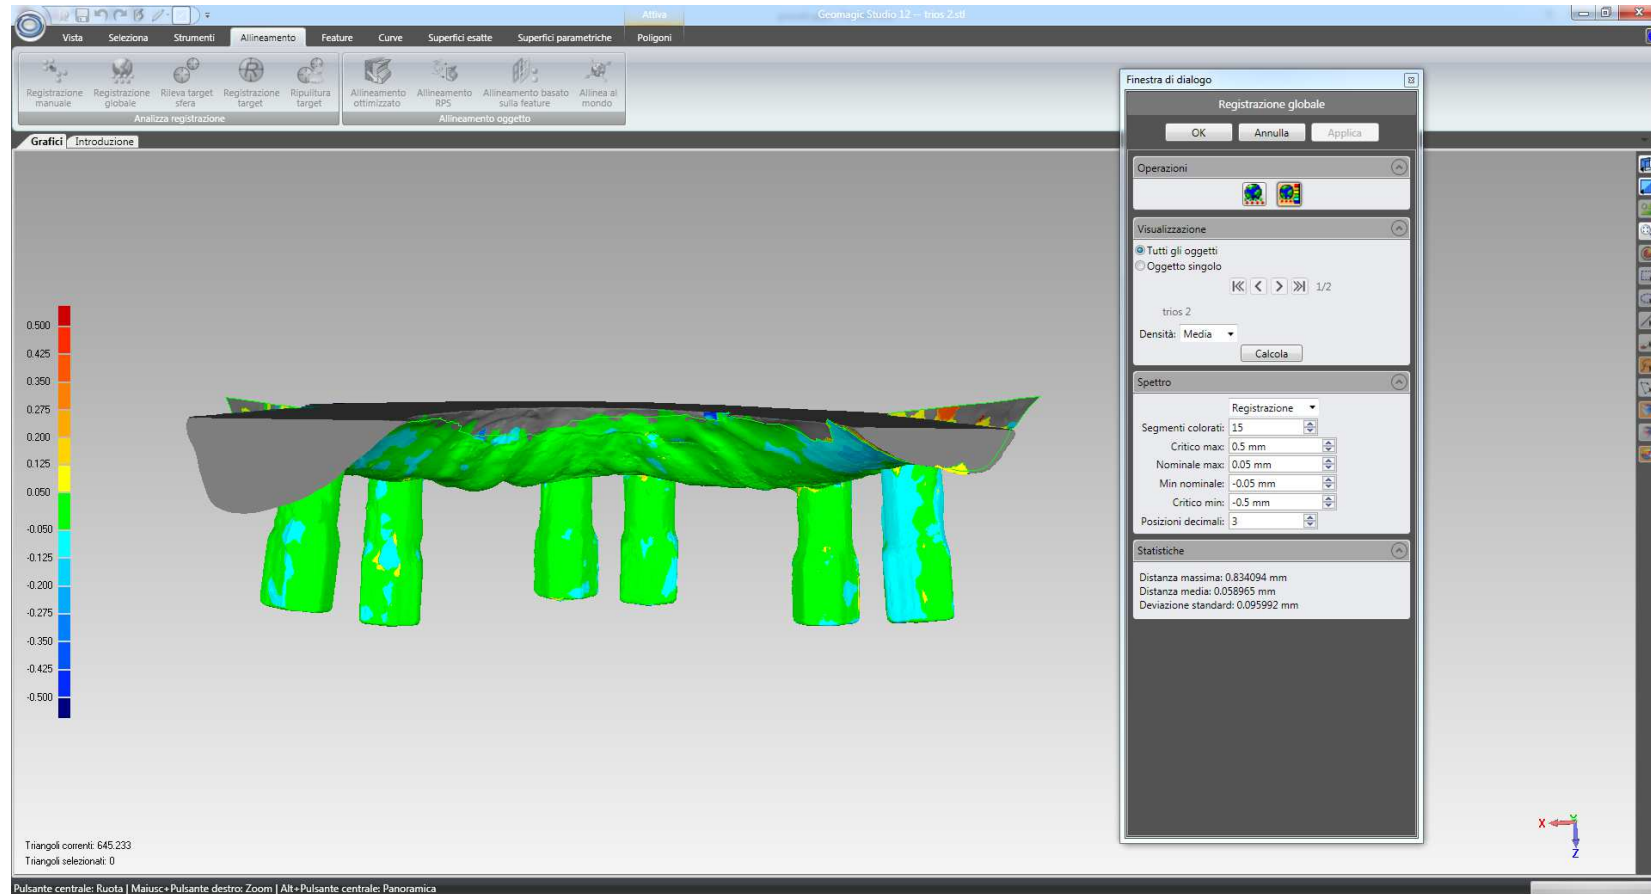

# TRIOS 3 vs REF (IMETRIC)

The screenshot displays the Geomagic Studio 12 interface. The main window shows a 3D model of a curved, arch-like part with a color-coded registration map. A vertical color scale on the left ranges from -0.500 (blue) to 0.500 (red). The registration map shows the model is mostly green and yellow, indicating good alignment, with some blue and red areas. The 'Finestra di dialogo' (dialog box) is open on the right, showing the following statistics for 'IMETRIC 2':

| Registrazione globale |             |
|-----------------------|-------------|
| OK Annulla Applica    |             |
| Operazioni            |             |
| Visualizzazione       |             |
| Tutti gli oggetti     |             |
| IMETRIC 2             |             |
| Densità: Media        |             |
| Calcola               |             |
| Spettro               |             |
| Registrazione         |             |
| Segmenti colorati:    | 15          |
| Critico max:          | 0.5 mm      |
| Nominale max:         | 0.05 mm     |
| Min nominale:         | -0.05 mm    |
| Critico min:          | -0.5 mm     |
| Posizioni decimali:   | 3           |
| Statistiche           |             |
| Distanza massima:     | 0.829709 mm |
| Distanza media:       | 0.057345 mm |
| Deviazione standard:  | 0.095641 mm |

At the bottom left, the status bar shows: Triangoli correnti: 647.846, Triangoli selezionati: 0. The Windows taskbar at the bottom shows the date 26/12/2015 and time 12:30.

# TRIOS 3 vs REF (IMETRIC)

Geomagic Studio 12 - IMETRIC 2.ati

Vista Selezione Strumenti Allineamento Feature Curve Superfici esatte Superfici parametriche Poligoni

Registrazione manuale Registrazione globale Rileva target sfera Registrazione target Ripulitura target Allineamento ottimizzato Allineamento RPS Allineamento basato sulla feature Allinea al mondo

Analizza registrazione

Grafici Introduzione

0.500  
0.425  
0.350  
0.275  
0.200  
0.125  
0.050  
-0.050  
-0.125  
-0.200  
-0.275  
-0.350  
-0.425  
-0.500

Triangoli correnti: 647.846  
Triangoli selezionati: 0

Pulsante centrale: Ruota | Maiusc+Pulsante destro: Zoom | Alt+Pulsante centrale: Panoramica

Finestra di dialogo

Registrazione globale

OK Annulla Applica

Operazioni

Visualizzazione

Tutti gli oggetti  
 Oggetto singolo

IMETRIC 2

Densità: Media

Calcola

Spettro

Registrazione

Segmenti colorati: 15

Critico max: 0.5 mm

Nominale max: 0.05 mm

Min nominale: -0.05 mm

Critico min: -0.5 mm

Posizioni decimali: 3

Statistiche

Distanza massima: 0.829709 mm  
Distanza media: 0.057345 mm  
Deviazione standard: 0.095641 mm

Gestione modelli

- IMETRIC 2
- trios 3
- Mondo

# TRIOS 3 vs REF (IMETRIC)

The screenshot displays the Geomagic Studio 12 interface. The main 3D view shows a hand model with a color-coded registration error map. The color scale ranges from -0.500 (blue) to 0.500 (red). The error map shows a mix of green, yellow, and blue, indicating varying levels of registration accuracy. The hand model is positioned in the center of the 3D view.

The interface includes a menu bar at the top with options: Vista, Selezione, Strumenti, Allineamento, Feature, Curve, Superfici esatte, Superfici parametriche, and Poligoni. Below the menu bar is a toolbar with various registration and alignment tools.

On the right side, there are two dialog boxes:

- Finestra di dialogo: Registrazione globale**
  - Buttons: OK, Annulla, Applica
  - Operazioni: [Icons]
  - Visualizzazione:  Tutti gli oggetti,  Oggetto singolo
  - Navigation: [Icons] 1/2
  - IMETRIC 2
  - Densità: Media
  - Calcola
  - Spettro: 
    - Segmenti colorati: 15
    - Critico max: 0.5 mm
    - Nominale max: 0.05 mm
    - Min nominale: -0.05 mm
    - Critico min: -0.5 mm
    - Posizioni decimali: 3
  - Statistiche:
    - Distanza massima: 0.829709 mm
    - Distanza media: 0.057345 mm
    - Deviazione standard: 0.095641 mm
- Gestione modelli**
  - IMETRIC 2
  - trios 3
  - Mondo

At the bottom left, the status bar shows: Triangoli correnti: 647.846, Triangoli selezionati: 0.

At the bottom, the keyboard shortcuts are: Pulsante centrale: Ruota | Maiusc+Pulsante destro: Zoom | Alt+Pulsante centrale: Panoramica



# TRIOS 3 vs REF (IMETRIC)

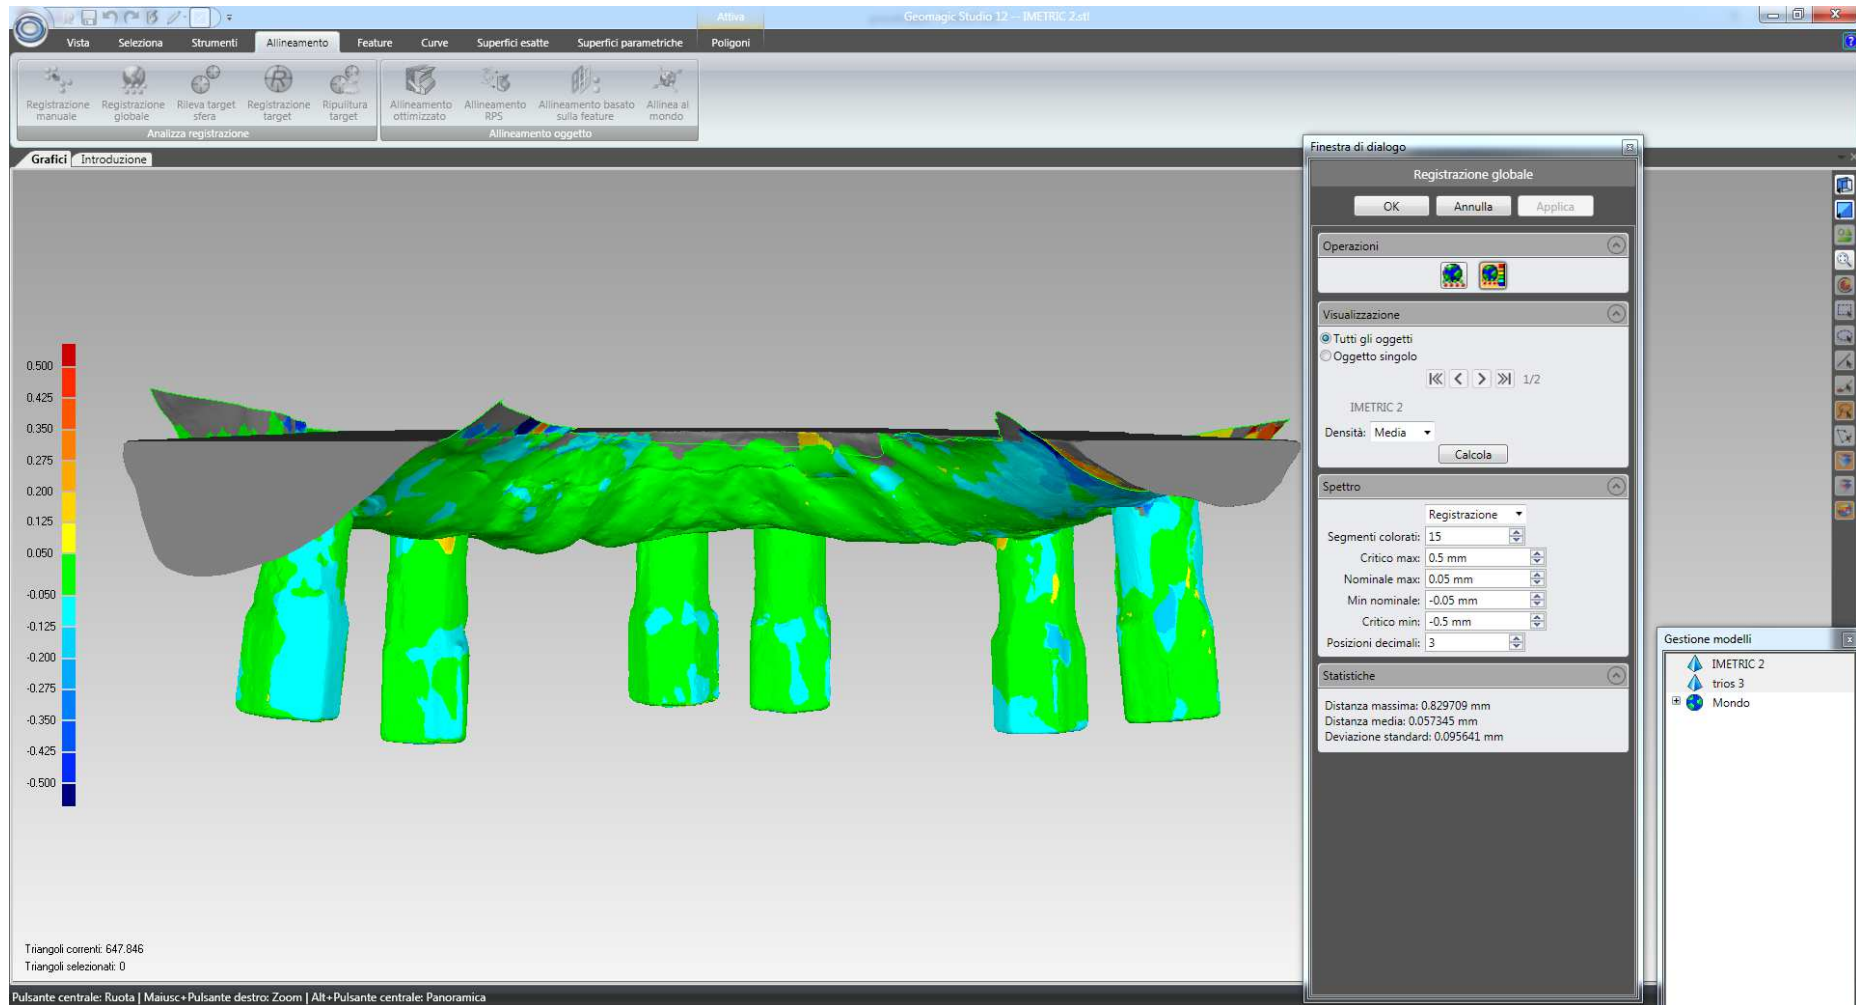

# TRIOS 4 vs REF (IMETRIC)

The screenshot displays the Geomagic Studio 12 interface. The main window shows a 3D model of a curved mechanical part with a color-coded registration error map. The error scale ranges from -0.500 mm (blue) to 0.500 mm (red). A dialog box on the right shows registration statistics: Distanza massima: 0.834995 mm, Distanza media: 0.065897 mm, Deviazione standard: 0.095986 mm.

**Finestra di dialogo: Registrazione globale**

Operazioni: [Icone di registrazione]

Visualizzazione:  
 Tutti gli oggetti  
 Oggetto singolo

IMETRIC 2  
Densità: Media [Calcola]

Spettro:  
Registrazione [Menu a tendina]  
Segmenti colorati: 15  
Critico max: 0.5 mm  
Nominale max: 0.05 mm  
Min nominale: -0.05 mm  
Critico min: -0.5 mm  
Posizioni decimali: 3

Statistiche:  
Distanza massima: 0.834995 mm  
Distanza media: 0.065897 mm  
Deviazione standard: 0.095986 mm

Triangoli correnti: 641.706  
Triangoli selezionati: 0

Pulsante centrale: Ruota | Maiusc+Pulsante destro: Zoom | Alt+Pulsante centrale: Panoramica

# TRIOS 4 vs REF (IMETRIC)

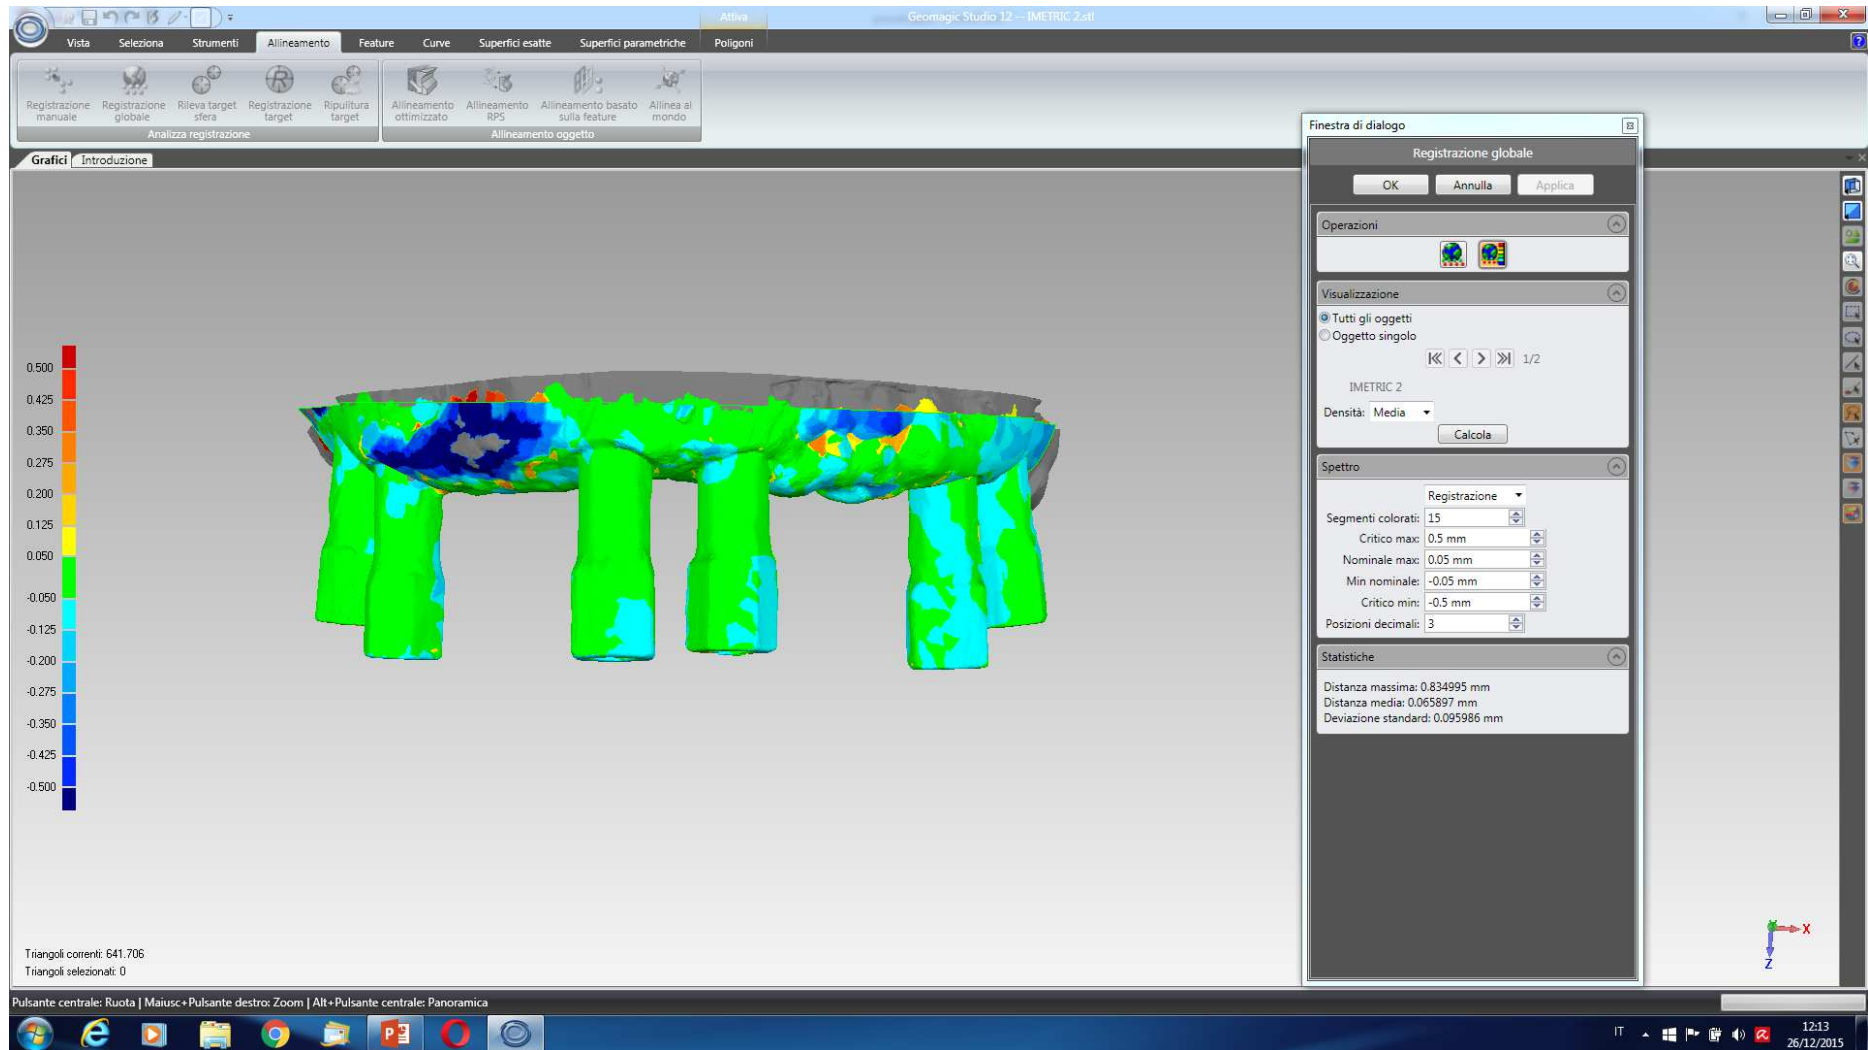

# TRIOS 4 vs REF (IMETRIC)

The screenshot displays the Geomagic Studio 12 interface. The main window shows a 3D model of a hand with a color-coded registration error map. The error scale ranges from -0.500 to 0.500 mm. A dialog box on the right displays registration statistics:

| Registrazione globale                              |          |
|----------------------------------------------------|----------|
| OK Annulla Applica                                 |          |
| Operazioni                                         |          |
| Visualizzazione                                    |          |
| <input checked="" type="radio"/> Tutti gli oggetti |          |
| <input type="radio"/> Oggetto singolo              |          |
| IMETRIC 2                                          |          |
| Densità:                                           | Media    |
| Calcola                                            |          |
| Spettro                                            |          |
| Registrazione                                      |          |
| Segmenti colorati:                                 | 15       |
| Critico max:                                       | 0.5 mm   |
| Nominale max:                                      | 0.05 mm  |
| Min nominale:                                      | -0.05 mm |
| Critico min:                                       | -0.5 mm  |
| Posizioni decimali:                                | 3        |
| Statistiche                                        |          |
| Distanza massima: 0.834995 mm                      |          |
| Distanza media: 0.065897 mm                        |          |
| Deviazione standard: 0.095986 mm                   |          |

Triangoli corenti: 641.706  
Triangoli selezionati: 0

Pulsante centrale: Ruota | Maiusc+Pulsante destro: Zoom | Alt+Pulsante centrale: Panoramica

# TRIOS 4 vs REF (IMETRIC)

Geomagic Studio 12 -- IMETRIC 2.stl

Vista Selezione Strumenti Allineamento Feature Curve Superfici esatte Superfici parametriche Poligoni

Registrazione manuale Registrazione globale Rileva target sfera Registrazione target Ripulitura target Analizza registrazione

Allineamento ottimizzato Allineamento RPS Allineamento basato sulla feature Allinea al mondo Allineamento oggetto

Grafici Introduzione

0.500  
0.425  
0.350  
0.275  
0.200  
0.125  
0.050  
-0.050  
-0.125  
-0.200  
-0.275  
-0.350  
-0.425  
-0.500

Triangoli correnti: 641.706  
Triangoli selezionati: 0

Pulsante centrale: Ruota | Maiusc+Pulsante destro: Zoom | Alt+Pulsante centrale: Panoramica

Finestra di dialogo

Registrazione globale

OK Annulla Applica

Operazioni

Visualizzazione

Tutti gli oggetti  
 Oggetto singolo

« « > >> 1/2

IMETRIC 2

Densità: Media

Calcola

Spettro

Registrazione

Segmenti colorati: 15

Critico max: 0.5 mm

Nominale max: 0.05 mm

Min nominale: -0.05 mm

Critico min: -0.5 mm

Posizioni decimali: 3

Statistiche

Distanza massima: 0.834995 mm  
Distanza media: 0.065897 mm  
Deviazione standard: 0.095986 mm

X  
Y  
Z

# TRIOS 5 vs REF (IMETRIC)

The screenshot displays the Geomagic Studio 12 interface with the following components:

- Toolbar:** Includes icons for registration (manuale, globale, sfera, target), alignment (ottimizzato, RPS, sulla feature, al mondo), and other tools.
- Model:** A 3D model of a curved part with a color-coded registration error map. The color scale ranges from -0.500 (dark blue) to 0.500 (dark red).
- Finestra di dialogo (Global Registration):**
  - Buttons: OK, Annulla, Applica
  - Operazioni: [Icons]
  - Visualizzazione:  Tutti gli oggetti,  Oggetto singolo
  - IMETRIC 2: Densità: Media, Calcola
- Gestione modelli (Model Management):**
  - Model list: IMETRIC 2, trios 5, Mondo
  - Spettro: Segmenti colorati: 15, Critico max: 0.5 mm, Nominale max: 0.05 mm, Min nominale: -0.05 mm, Critico min: -0.5 mm, Posizioni decimali: 3
  - Statistiche: Distanza massima: 0.850538 mm, Distanza media: 0.059800 mm, Deviazione standard: 0.092869 mm

Triangoli correnti: 631.632  
Triangoli selezionati: 0

# TRIOS 5 vs REF (IMETRIC)

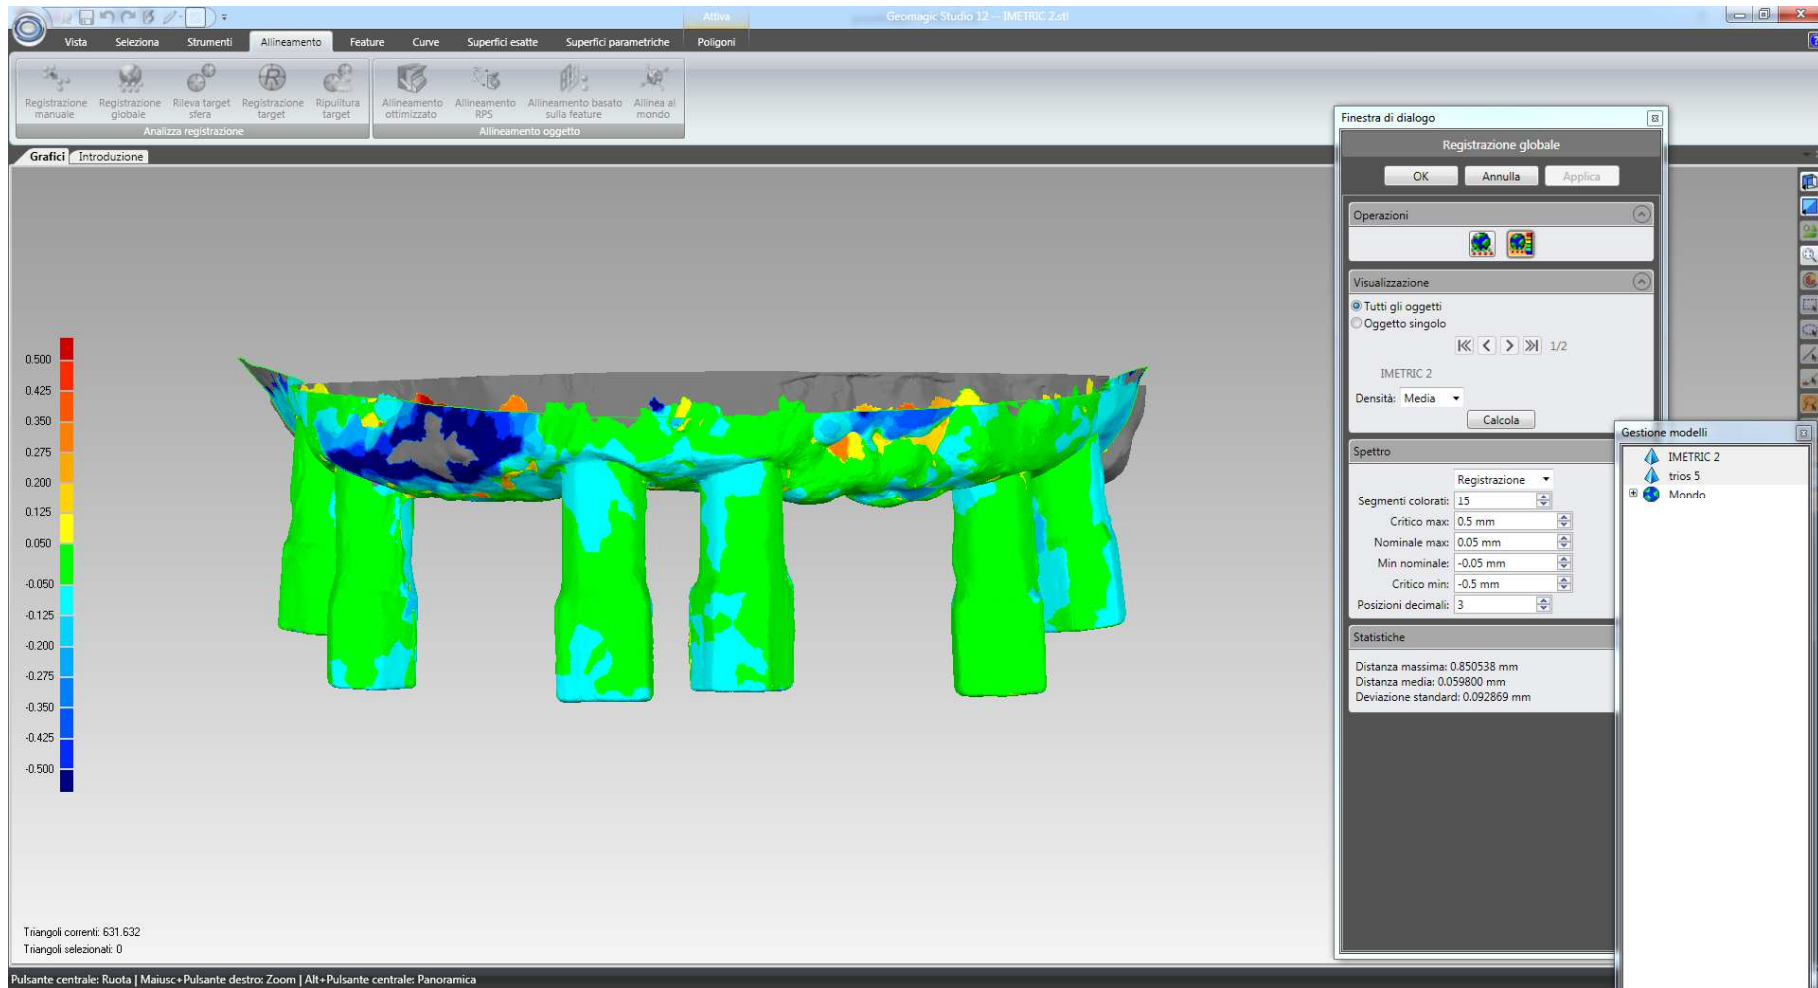

# TRIOS 5 vs REF (IMETRIC)

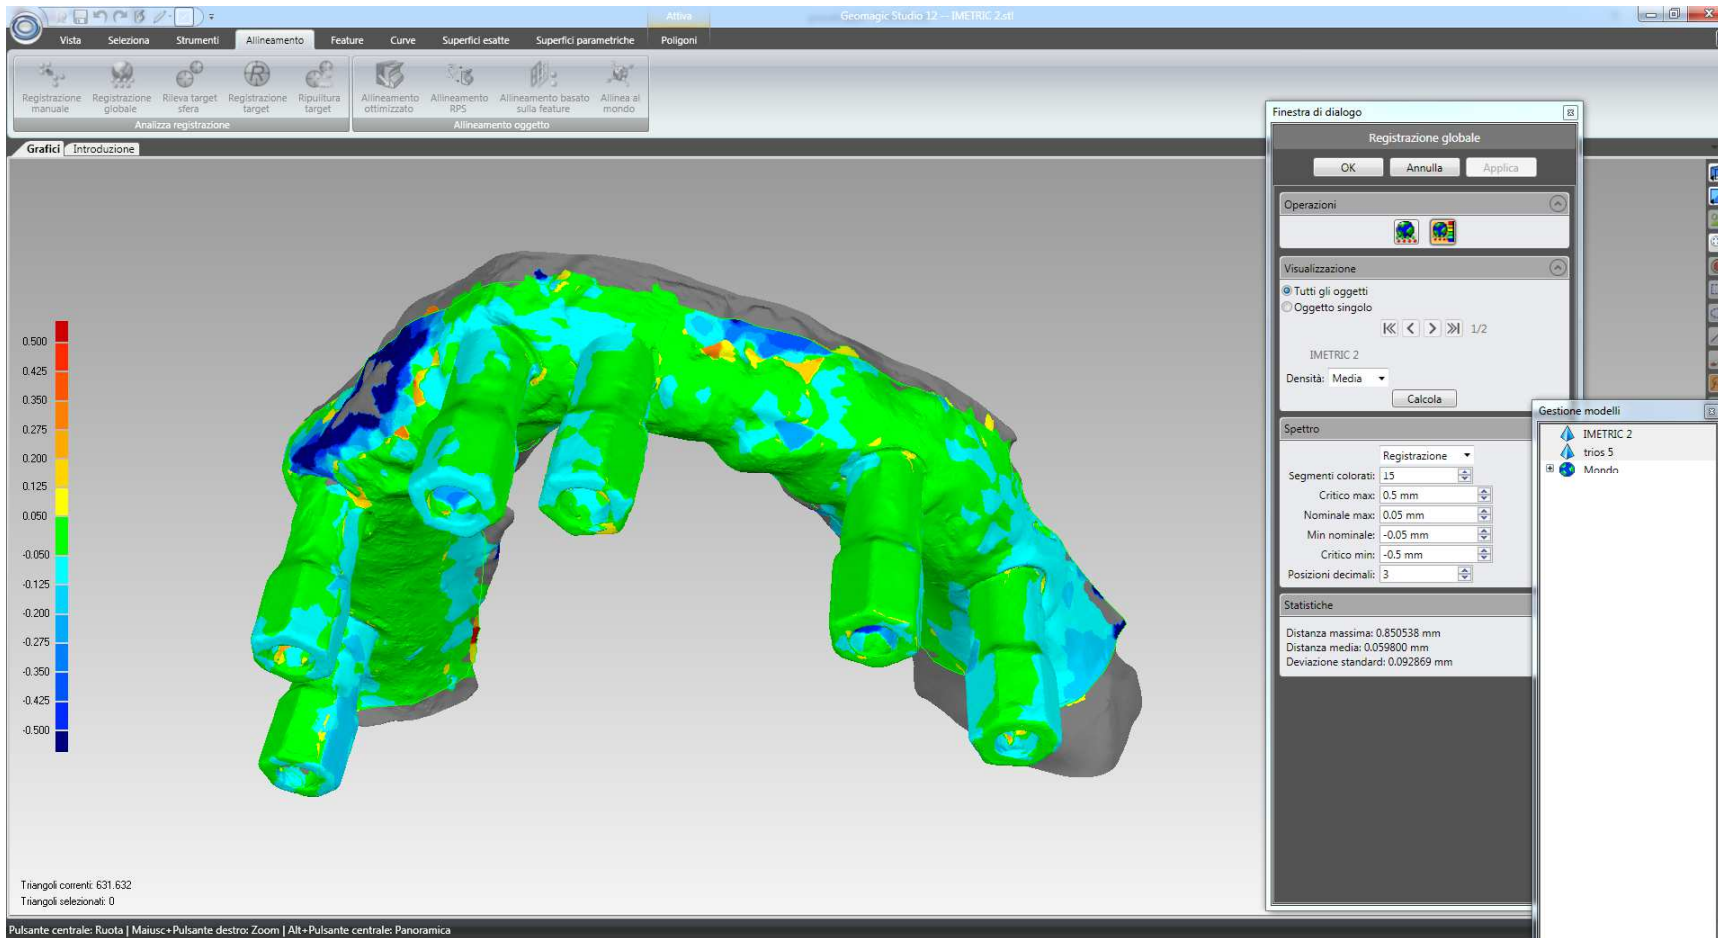



# TRIOS 5 vs REF (IMETRIC)

The screenshot displays the Geomagic Studio 12 interface. The main window shows a 3D model of a mechanical part with a color-coded surface deviation map. The color scale on the left ranges from -0.500 (blue) to 0.500 (red). The software interface includes a menu bar, a toolbar with registration and alignment tools, and several floating dialog boxes on the right.

**Finestra di dialogo: Registrazione globale**

OK Annulla Applica

Operazioni

Visualizzazione

Tutti gli oggetti  
 Oggetto singolo

IMETRIC 2

Densità: Media

Calcola

**Spettro**

Registrazione

Segmenti colorati: 15

Critico max: 0.5 mm

Nominale max: 0.05 mm

Min nominale: -0.05 mm

Critico min: -0.5 mm

Posizioni decimali: 3

**Statistiche**

Distanza massima: 0.850538 mm  
Distanza media: 0.059800 mm  
Deviazione standard: 0.092869 mm

**Gestione modelli**

- IMETRIC 2
  - trios 5
  - Mondo

Triangoli correnti: 631.632  
Triangoli selezionati: 0

Pulsante centrale: Ruota | Maiusc+Pulsante destro: Zoom | Alt+Pulsante centrale: Panoramica

TRIOS general trueness in the totally edentulous model

|         | Mean distance | SD    | Maximum distance |
|---------|---------------|-------|------------------|
| Trios 1 | 0.119         | 0.135 | 0.833            |
| Trios 2 | 0.058         | 0.095 | 0.834            |
| Trios 3 | 0.057         | 0.095 | 0.829            |
| Trios 4 | 0.065         | 0.095 | 0.834            |
| Trios 5 | 0.059         | 0.092 | 0.850            |

**Overall Trios general accuracy: 0.071 (0.026)**

# ZFX 1 vs REF (IMETRIC)

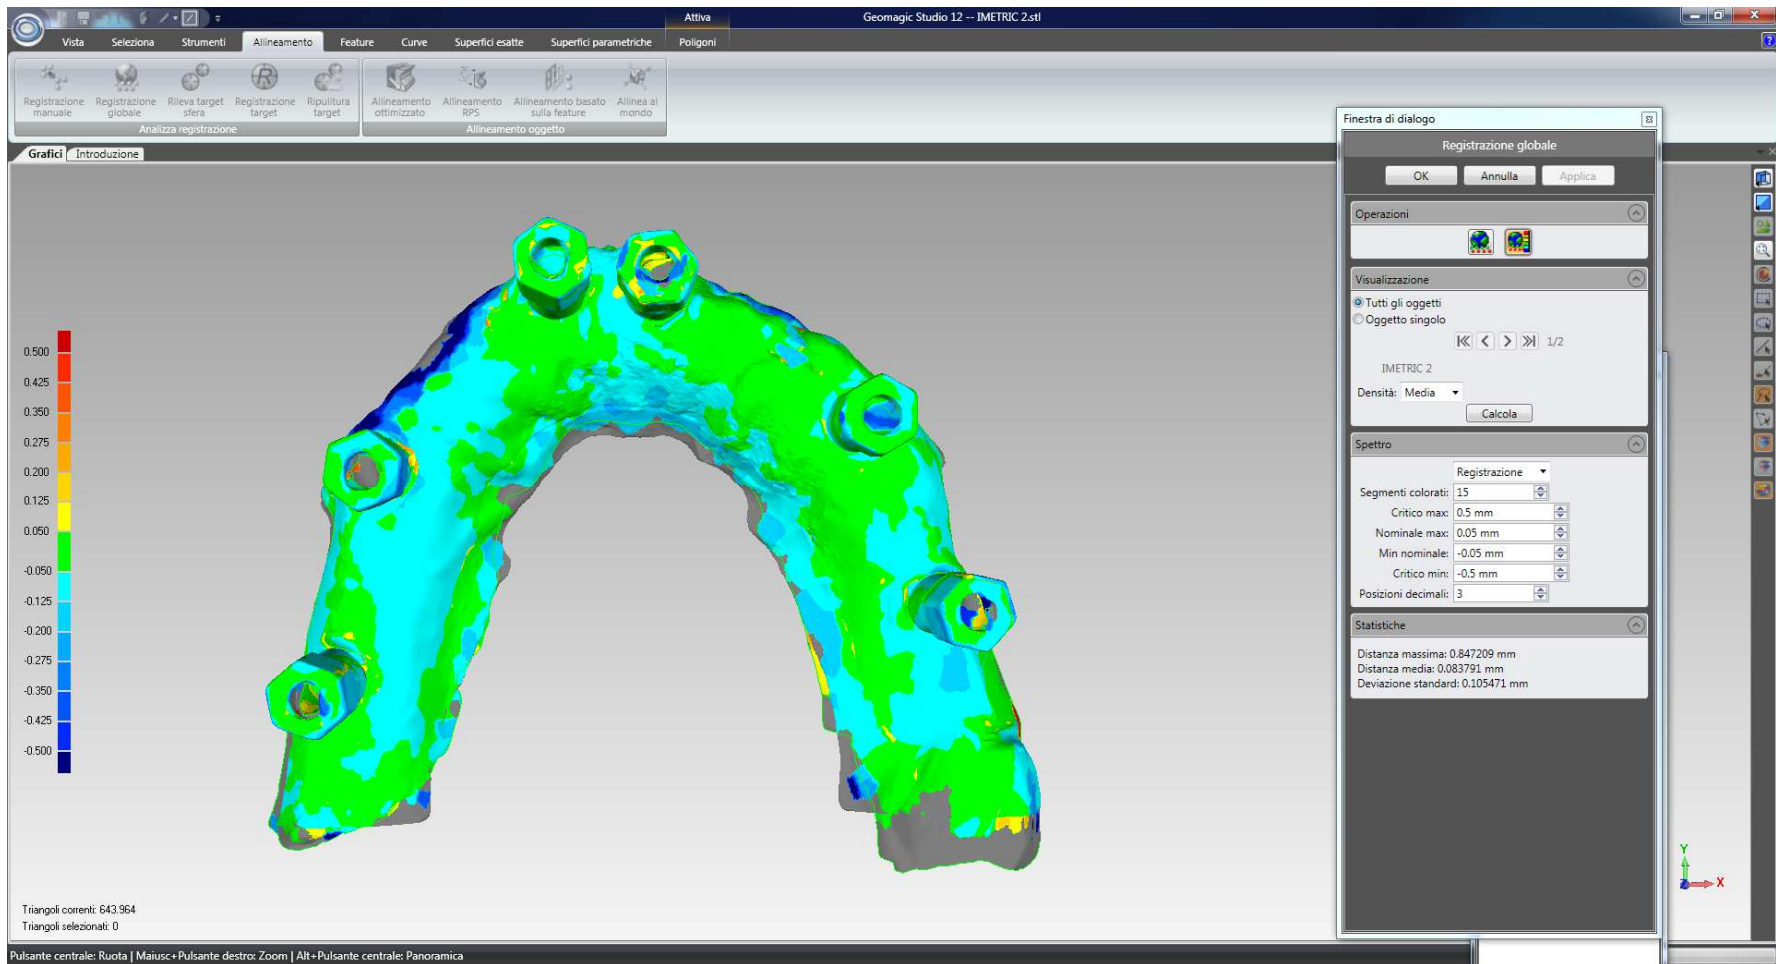

# ZFX 1 vs REF (IMETRIC)

The screenshot displays the Geomagic Studio 12 interface. The main window shows a 3D model of a table with a color-coded surface deviation map. The color scale on the left ranges from -0.500 to 0.500. The model is centered in the main view, with a vertical color scale on the left ranging from -0.500 to 0.500. The surface is mostly green and blue, indicating deviations within the nominal range, with some yellow and orange spots. The right-hand side features a 'Finestra di dialogo' (Dialog Window) for 'Registrazione globale' (Global Registration) with various settings for visualization and statistics.

**Finestra di dialogo: Registrazione globale**

Operazioni: [Icona]

Visualizzazione:  
 Tutti gli oggetti  
 Oggetto singolo  
IMETRIC 2  
Densità: Media  
Calcola

Spettro:  
Registrazione  
Segmenti colorati: 15  
Critico max: 0.5 mm  
Nominale max: 0.05 mm  
Min nominale: -0.05 mm  
Critico min: -0.5 mm  
Posizioni decimali: 3

Statistiche:  
Distanza massima: 0.847209 mm  
Distanza media: 0.083791 mm  
Deviazione standard: 0.105471 mm

Triangoli correnti: 643.964  
Triangoli selezionati: 0

Pulsante centrale: Ruota | Maiusc+Pulsante destro: Zoom | Alt+Pulsante centrale: Panoramica

# ZFX 1 vs REF (IMETRIC)

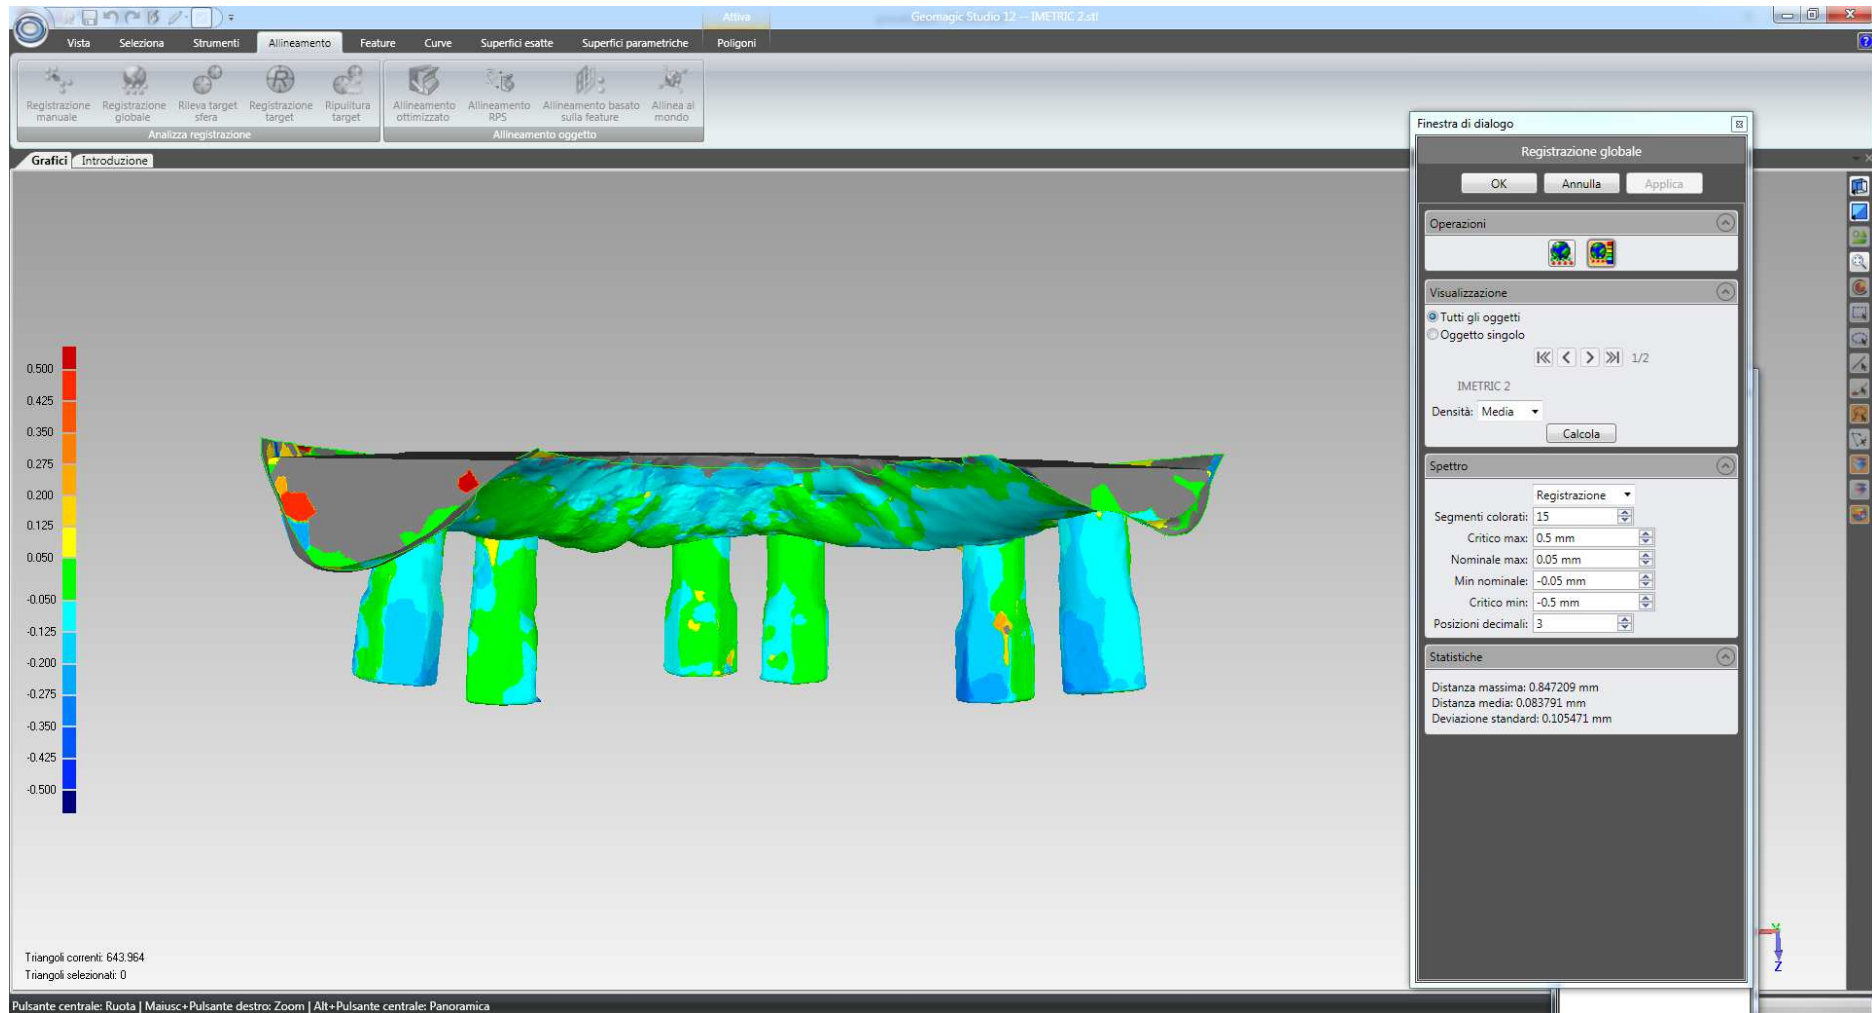

# ZFX 1 vs REF (IMETRIC)

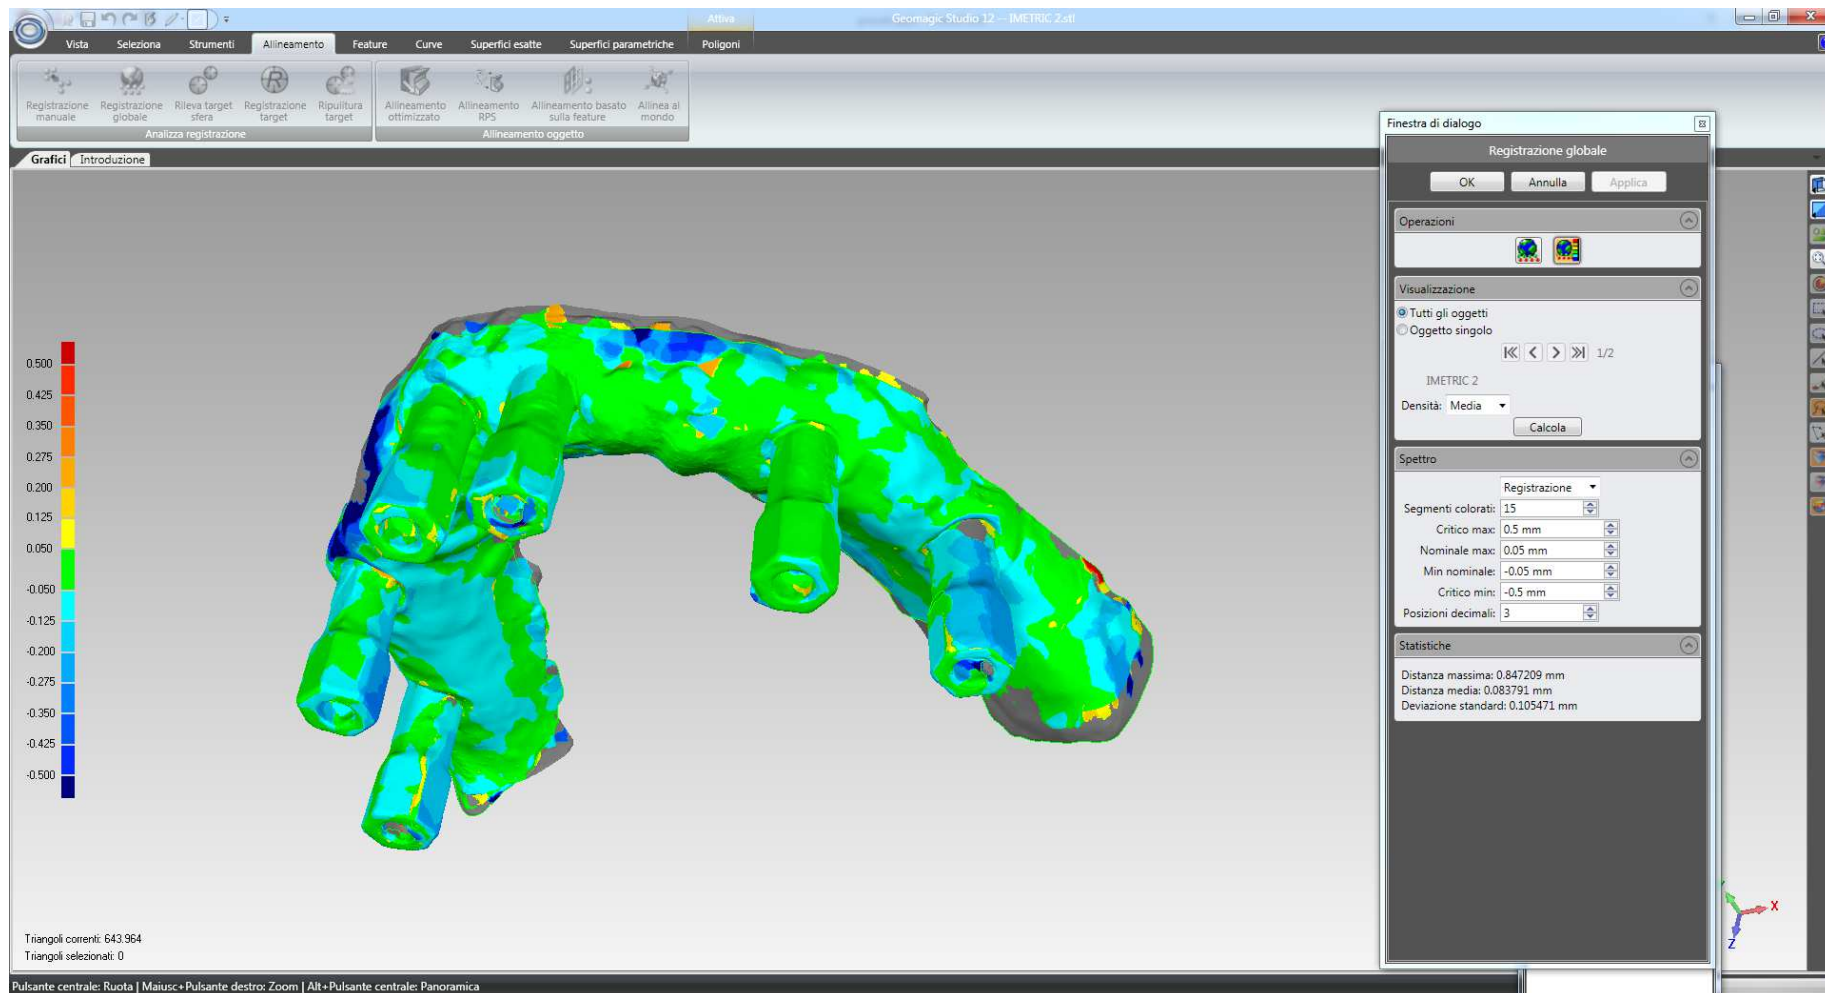

# ZFX 2 vs REF (IMETRIC)

Geomagic Studio 12 -- IMETRIC 2.stl

Vista Selezione Strumenti Allineamento Feature Curve Superfici esatte Superfici parametriche Poligoni

Registrazione manuale Registrazione globale Rileva target sfera Registrazione target Ripulitura target

Analizza registrazione

Allineamento ottimizzato Allineamento RPS Allineamento basato sulla feature Allinea al mondo

Allineamento oggetto

Grafici Introduzione

0.500  
0.425  
0.350  
0.275  
0.200  
0.125  
0.050  
-0.050  
-0.125  
-0.200  
-0.275  
-0.350  
-0.425  
-0.500

Triangoli correnti: 628.962  
Triangoli selezionati: 0

Pulsante centrale: Ruota | Maiusc+Pulsante destro: Zoom | Alt+Pulsante centrale: Panoramica

Finestra di dialogo

Registrazione globale

OK Annulla Applica

Operazioni

Visualizzazione

Tutti gli oggetti  
 Oggetto singolo

IMETRIC 2

Densità: Media

Calcola

Spettro

Registrazione

Segmenti colorati: 15

Critico max: 0.5 mm

Nominale max: 0.05 mm

Min nominale: -0.05 mm

Critico min: -0.5 mm

Posizioni decimali: 3

Statistiche

Distanza massima: 0.827961 mm  
Distanza media: 0.108259 mm  
Deviazione standard: 0.122420 mm

# ZFX 2 vs REF (IMETRIC)

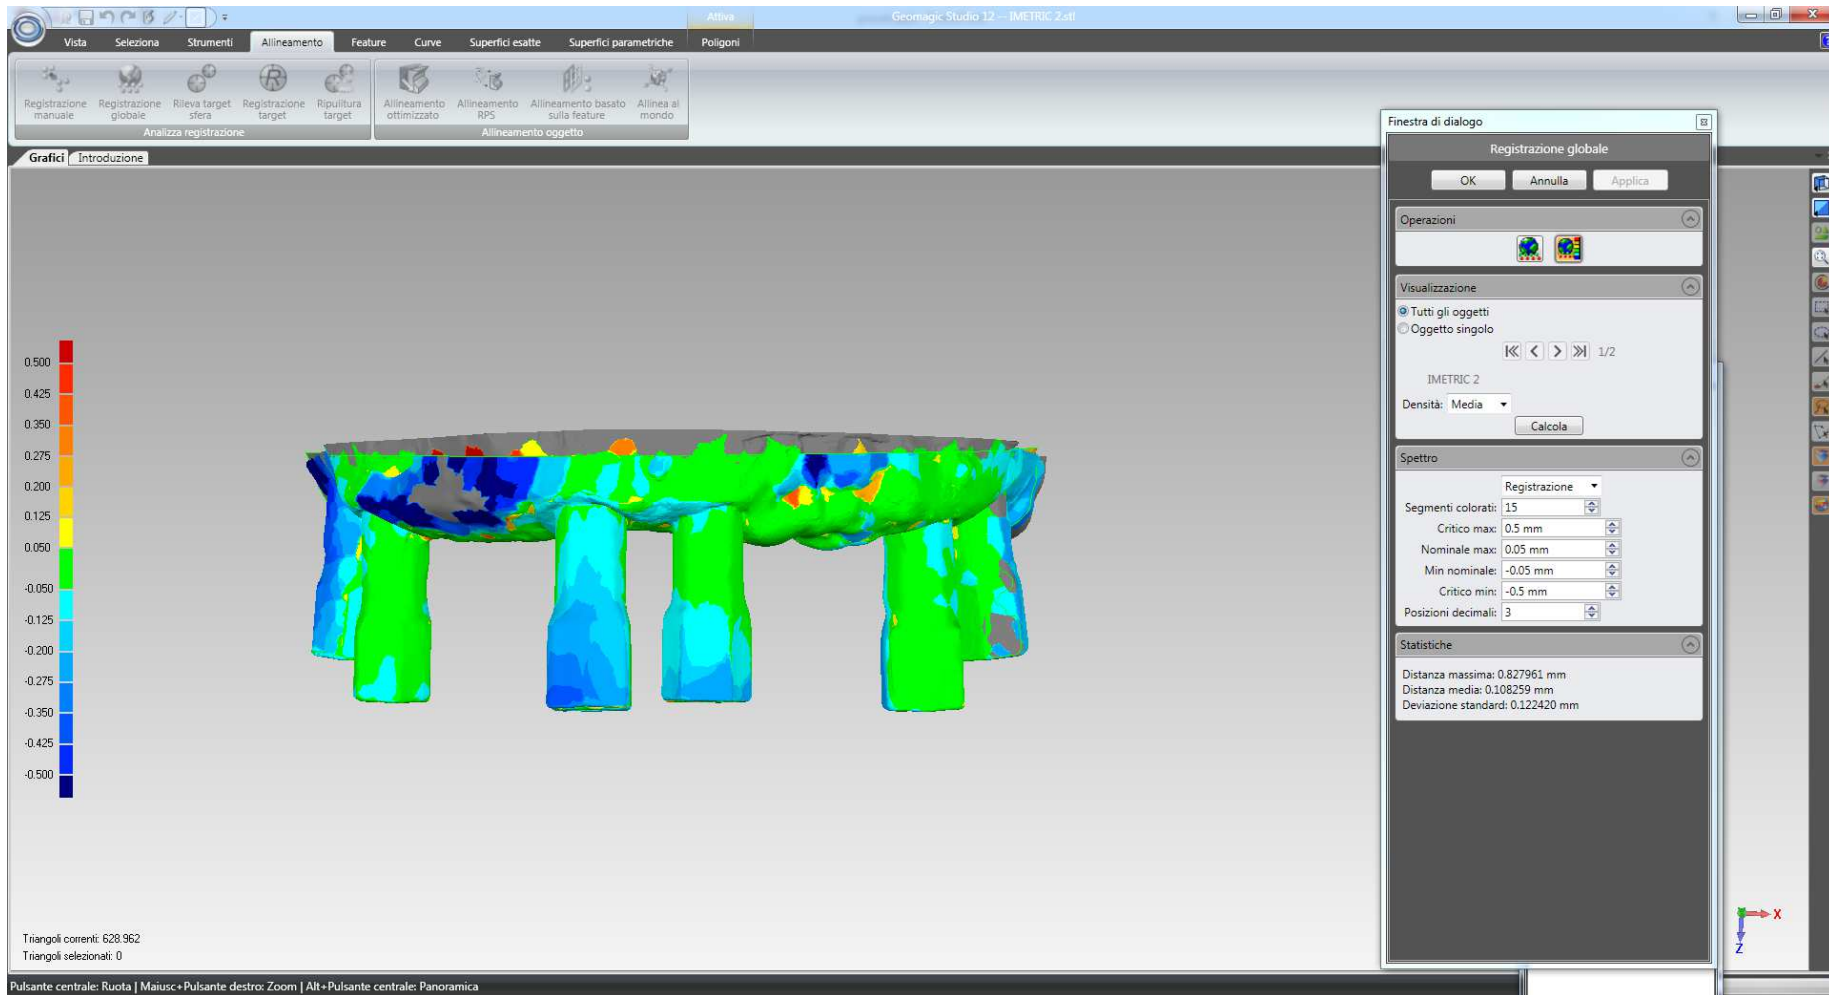



# ZFX 2 vs REF (IMETRIC)

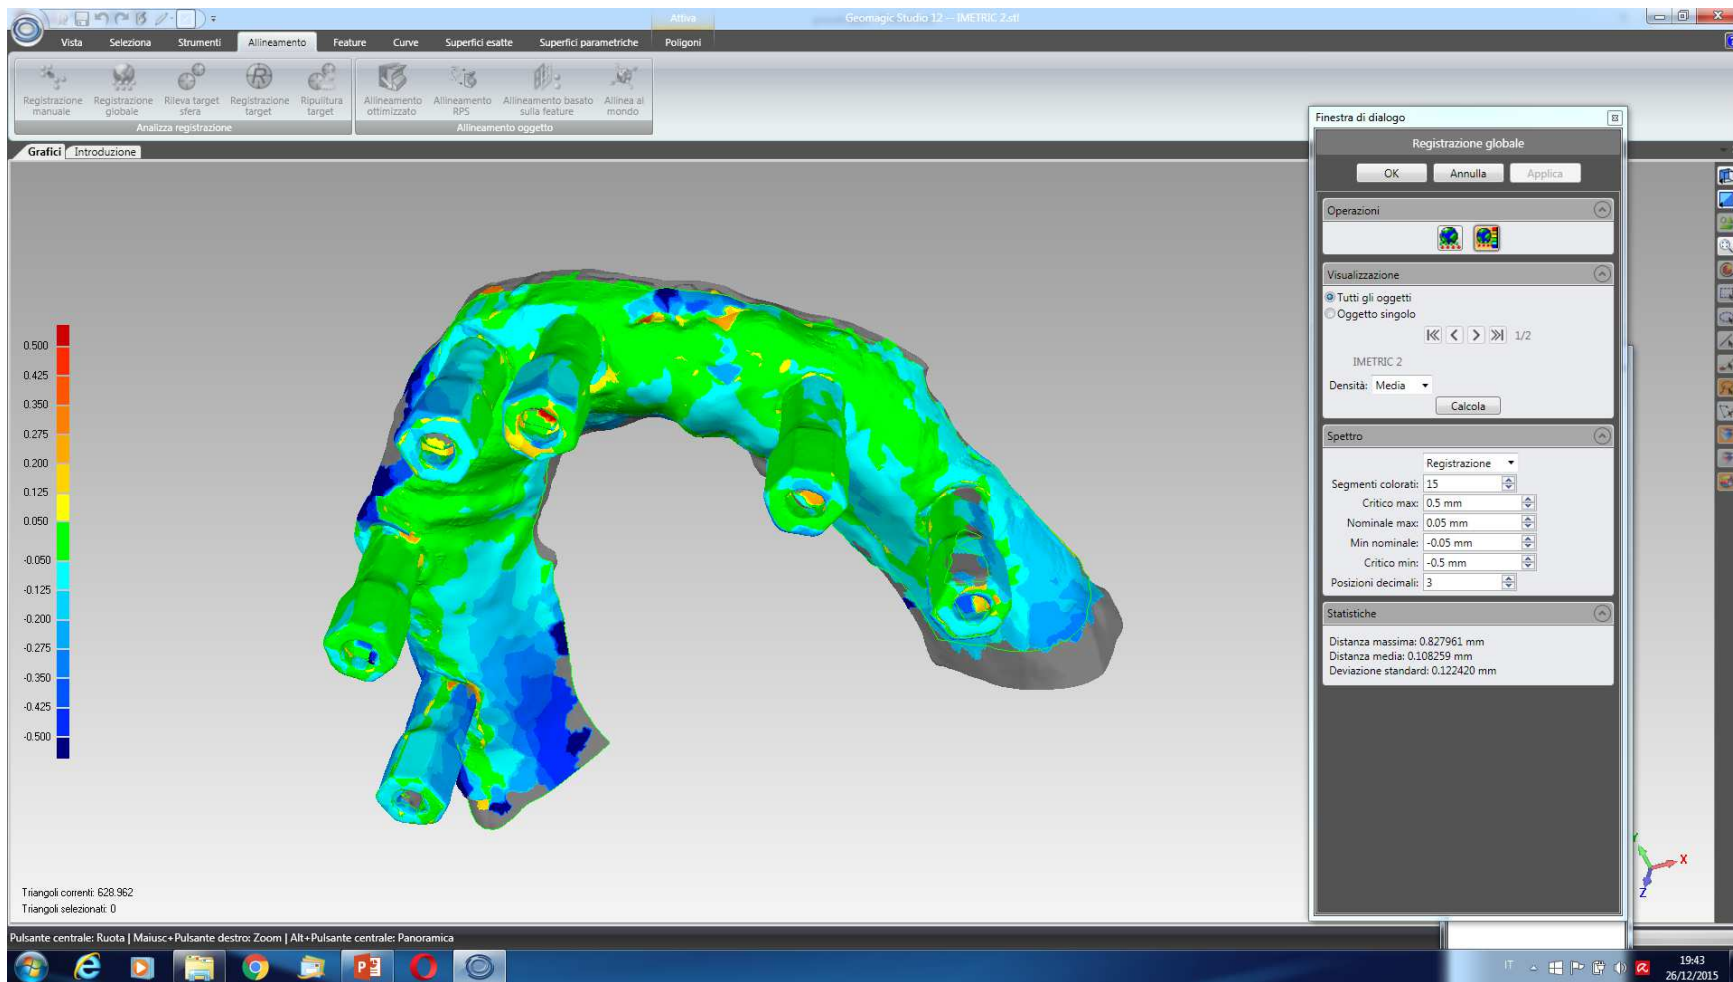

# ZFX 2 vs REF (IMETRIC)

The screenshot displays the Geomagic Studio 12 interface. The main window shows a 3D model of a mechanical part with a color-coded surface deviation map. The color scale on the left ranges from -0.500 to 0.500. The model is supported by four vertical pillars. A dialog box on the right shows registration settings for 'IMETRIC 2'.

**Finestra di dialogo: Registrazione globale**

OK Annulla Applica

Operazioni

Visualizzazione

Tutti gli oggetti  
 Oggetto singolo

IMETRIC 2

Densità: Media

Calcola

Spettro

Registrazione

Segmenti colorati: 15

Critico max: 0.5 mm

Nominale max: 0.05 mm

Min nominale: -0.05 mm

Critico min: -0.5 mm

Posizioni decimali: 3

Statistiche

Distanza massima: 0.827961 mm  
Distanza media: 0.108259 mm  
Deviazione standard: 0.122420 mm

Triangoli corenti: 628.962  
Triangoli selezionati: 0

Pulsante centrale: Ruota | Maiusc+Pulsante destro: Zoom | Alt+Pulsante centrale: Panoramica

# ZFX 3 vs REF (IMETRIC)

The screenshot displays the Geomagic Studio 12 interface. The main window shows a 3D model of a curved, arch-like part with a color-coded deviation map. The color scale on the left ranges from -0.500 (blue) to 0.500 (red). The model is overlaid on a reference mesh. The right side of the interface shows a 'Finestra di dialogo' (Dialog Box) for 'Registrazione globale' (Global Registration). The dialog box includes sections for 'Operazioni', 'Visualizzazione', 'Spettro', and 'Statistiche'. The 'Spettro' section shows settings for 'Registrazione', 'Segmenti colorati: 15', 'Critico max: 0.5 mm', 'Nominale max: 0.05 mm', 'Min nominale: -0.05 mm', 'Critico min: -0.5 mm', and 'Posizioni decimali: 3'. The 'Statistiche' section shows 'Distanza massima: 0.845331 mm', 'Distanza media: 0.148497 mm', and 'Deviazione standard: 0.122235 mm'. The bottom status bar indicates 'Pulsante centrale: Ruota | Maiusc+Pulsante destro: Zoom | Alt+Pulsante centrale: Panoramica'.

Triangoli correnti: 624.163  
Triangoli selezionati: 0

Pulsante centrale: Ruota | Maiusc+Pulsante destro: Zoom | Alt+Pulsante centrale: Panoramica

# ZFX 3 vs REF (IMETRIC)

The screenshot displays the Geomagic Studio 12 interface. The main window shows a 3D model of a mechanical part with a color-coded registration error map. The error scale ranges from -0.500 to 0.500 mm. The dialog box on the right shows the following registration statistics:

| Statistica          | Valore      |
|---------------------|-------------|
| Distanza massima    | 0.845331 mm |
| Distanza media      | 0.148497 mm |
| Deviazione standard | 0.122235 mm |

Additional information from the dialog box:

- Operazioni: 2
- Visualizzazione: Tutti gli oggetti
- Densità: Media
- Spettro: Registrazione
- Segmenti colorati: 15
- Critico max: 0.5 mm
- Nominale max: 0.05 mm
- Min nominale: -0.05 mm
- Critico min: -0.5 mm
- Posizioni decimali: 3

Bottom status bar: Pulsante centrale: Ruota | Maiusc+Pulsante destro: Zoom | Alt+Pulsante centrale: Panoramica

# ZFX 3 vs REF (IMETRIC)

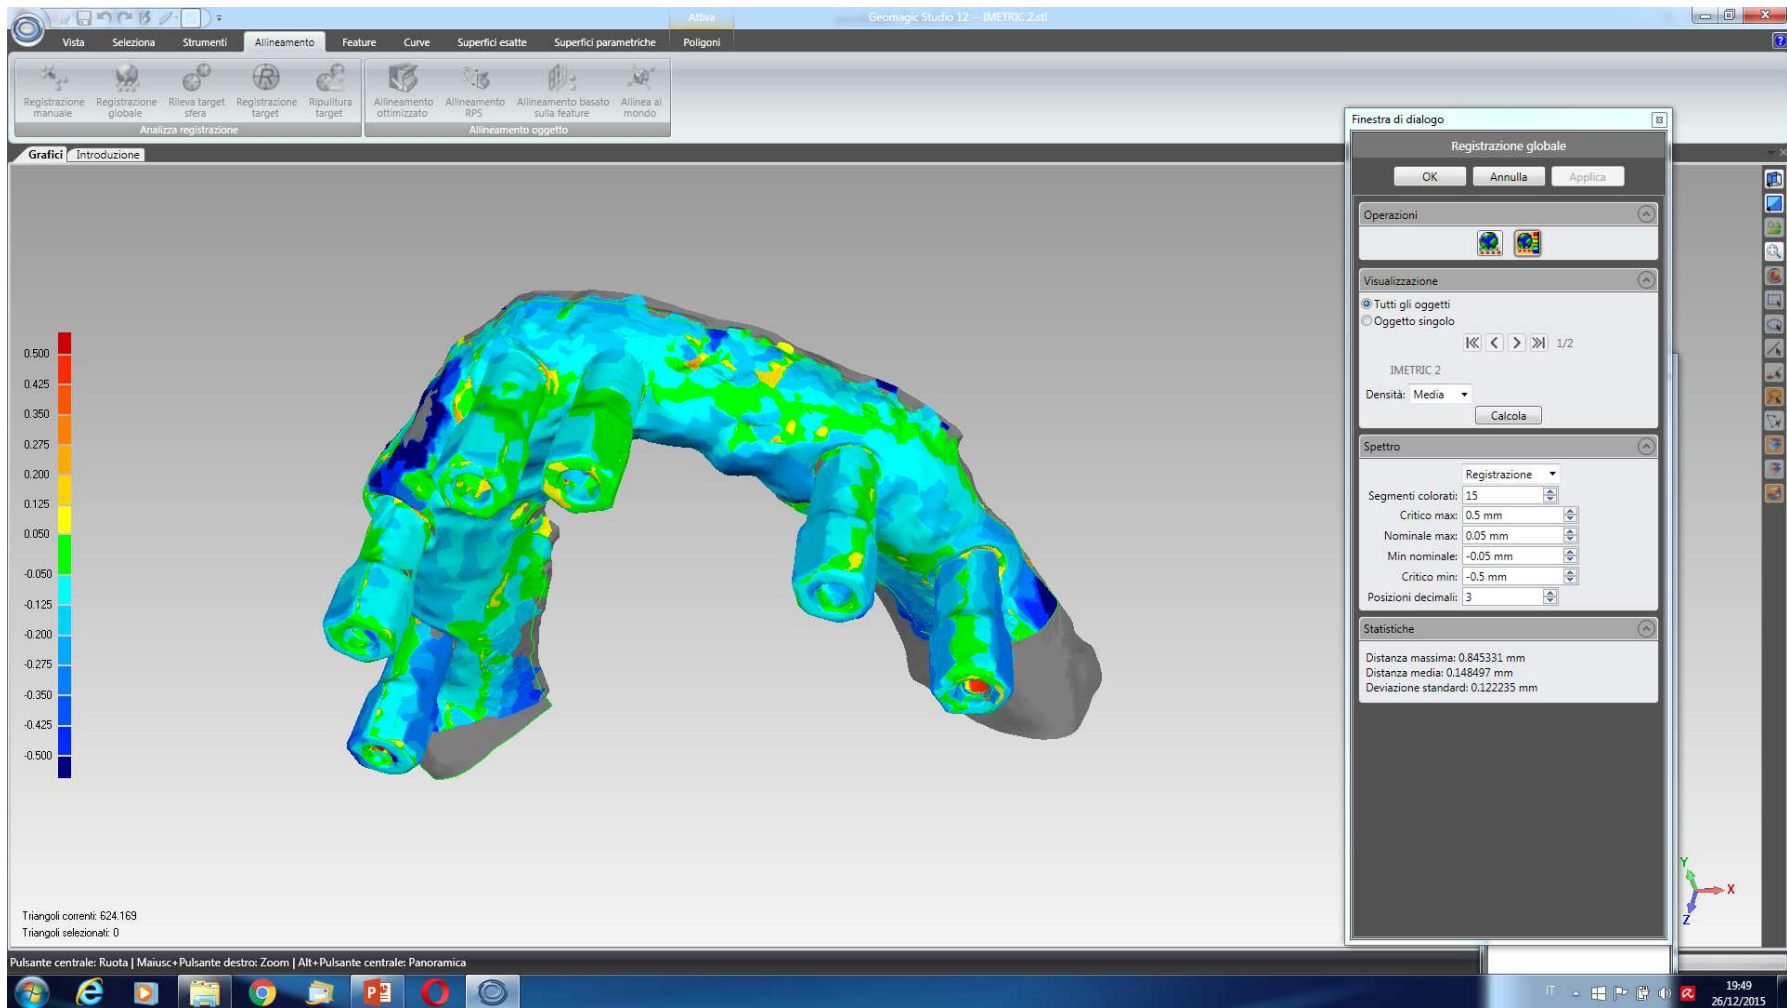

# ZFX 3 vs REF (IMETRIC)

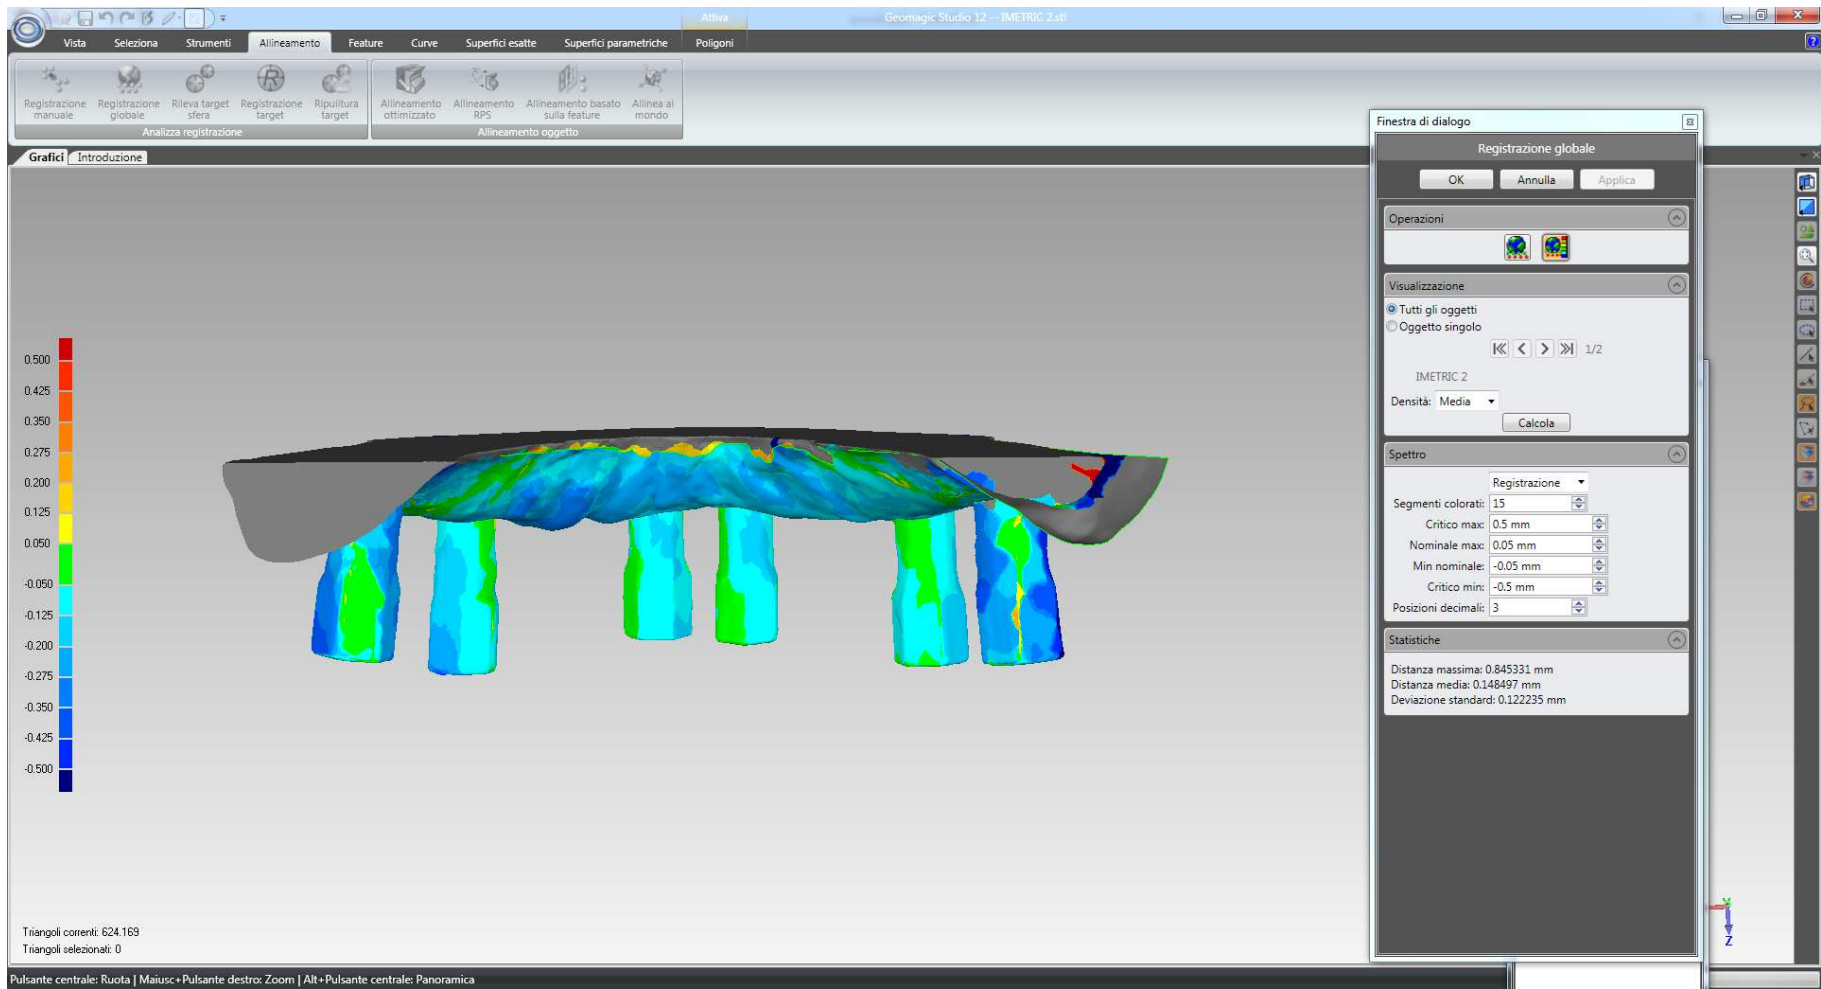

# ZFX 4 vs REF (IMETRIC)

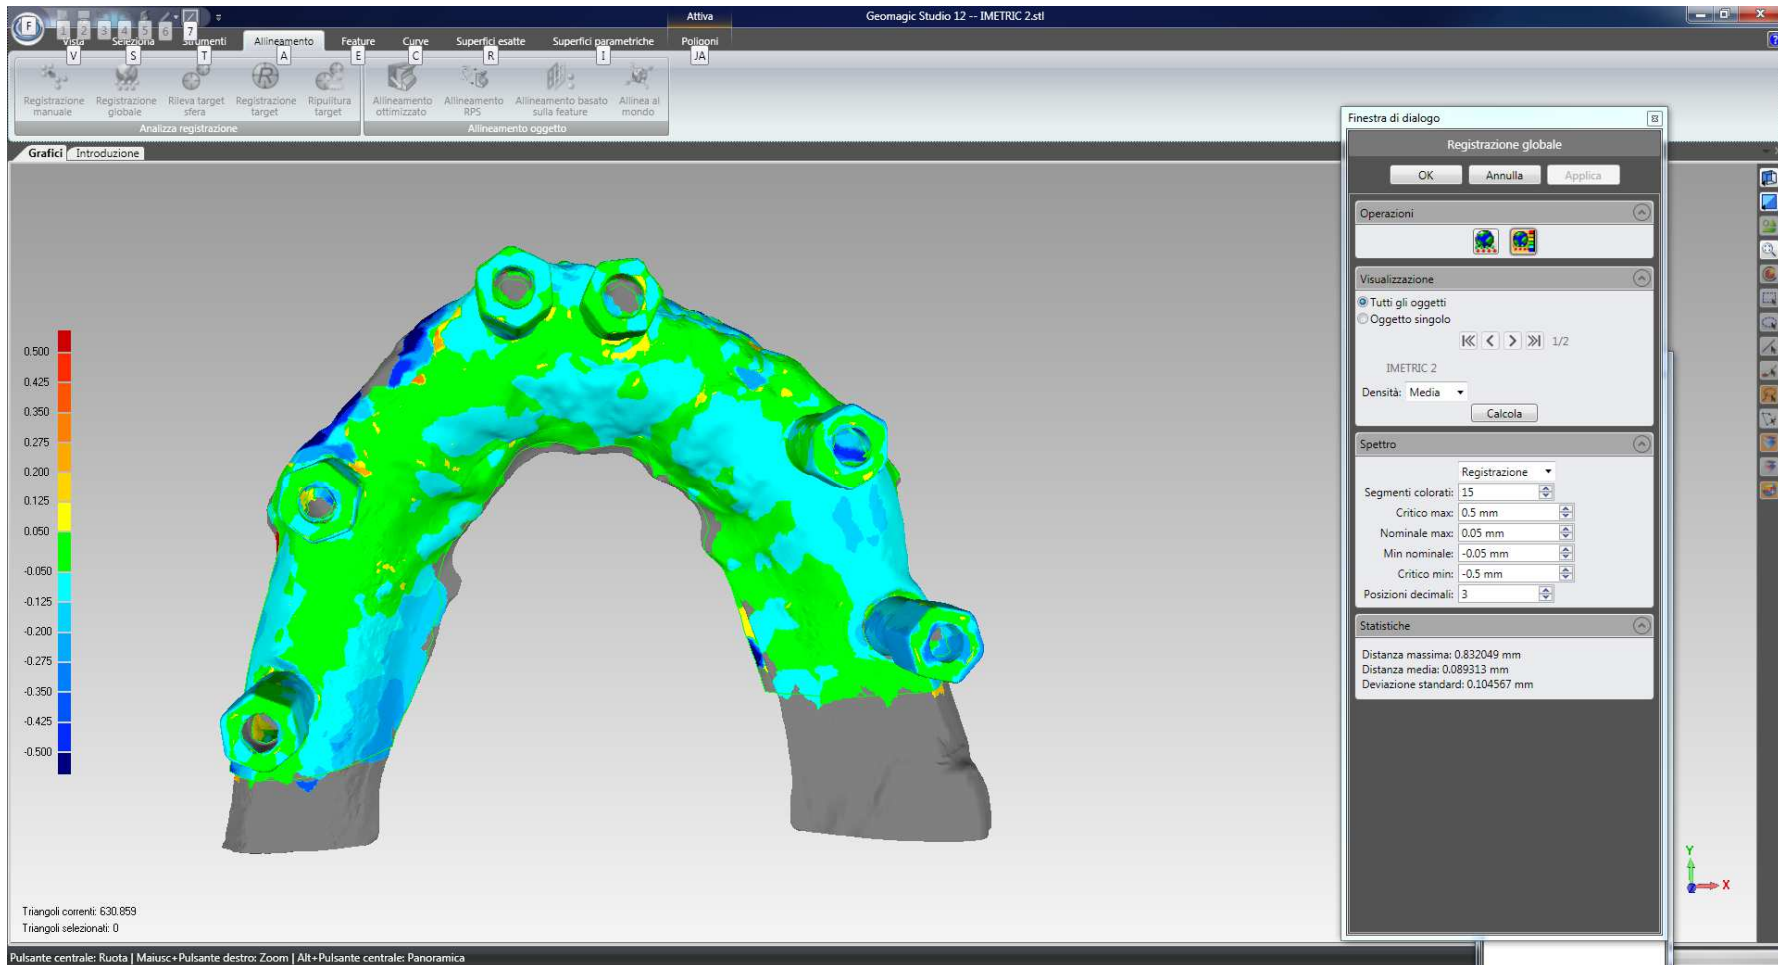

# ZFX 4 vs REF (IMETRIC)

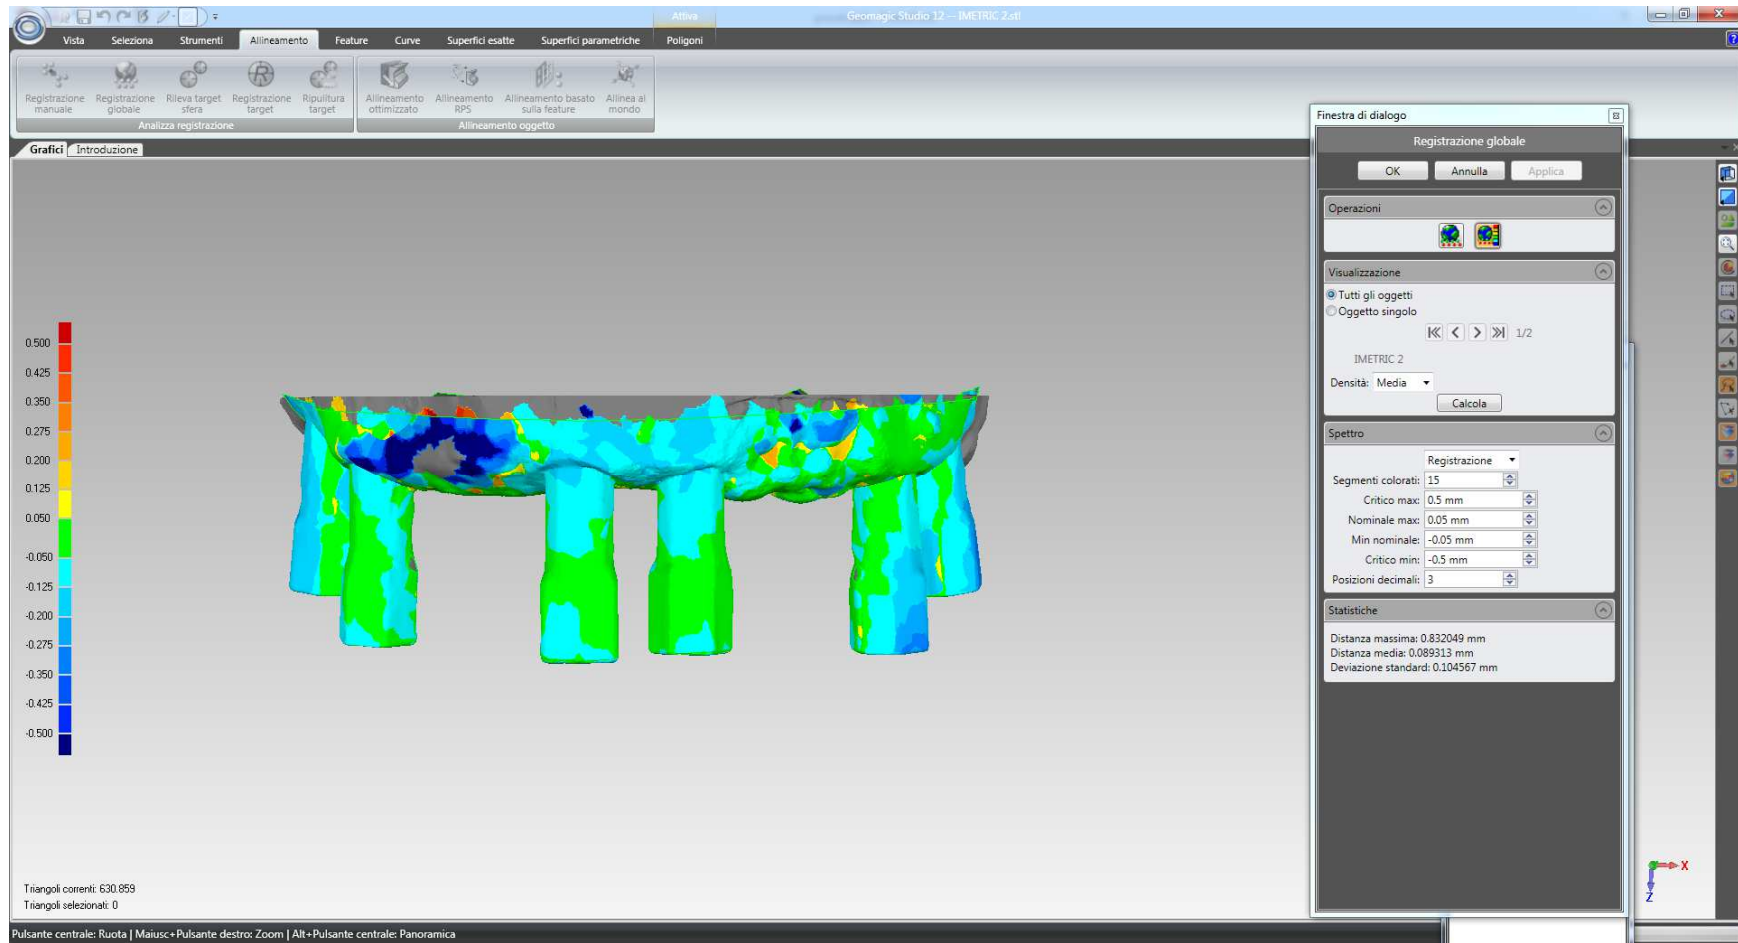



# ZFX 4 vs REF (IMETRIC)

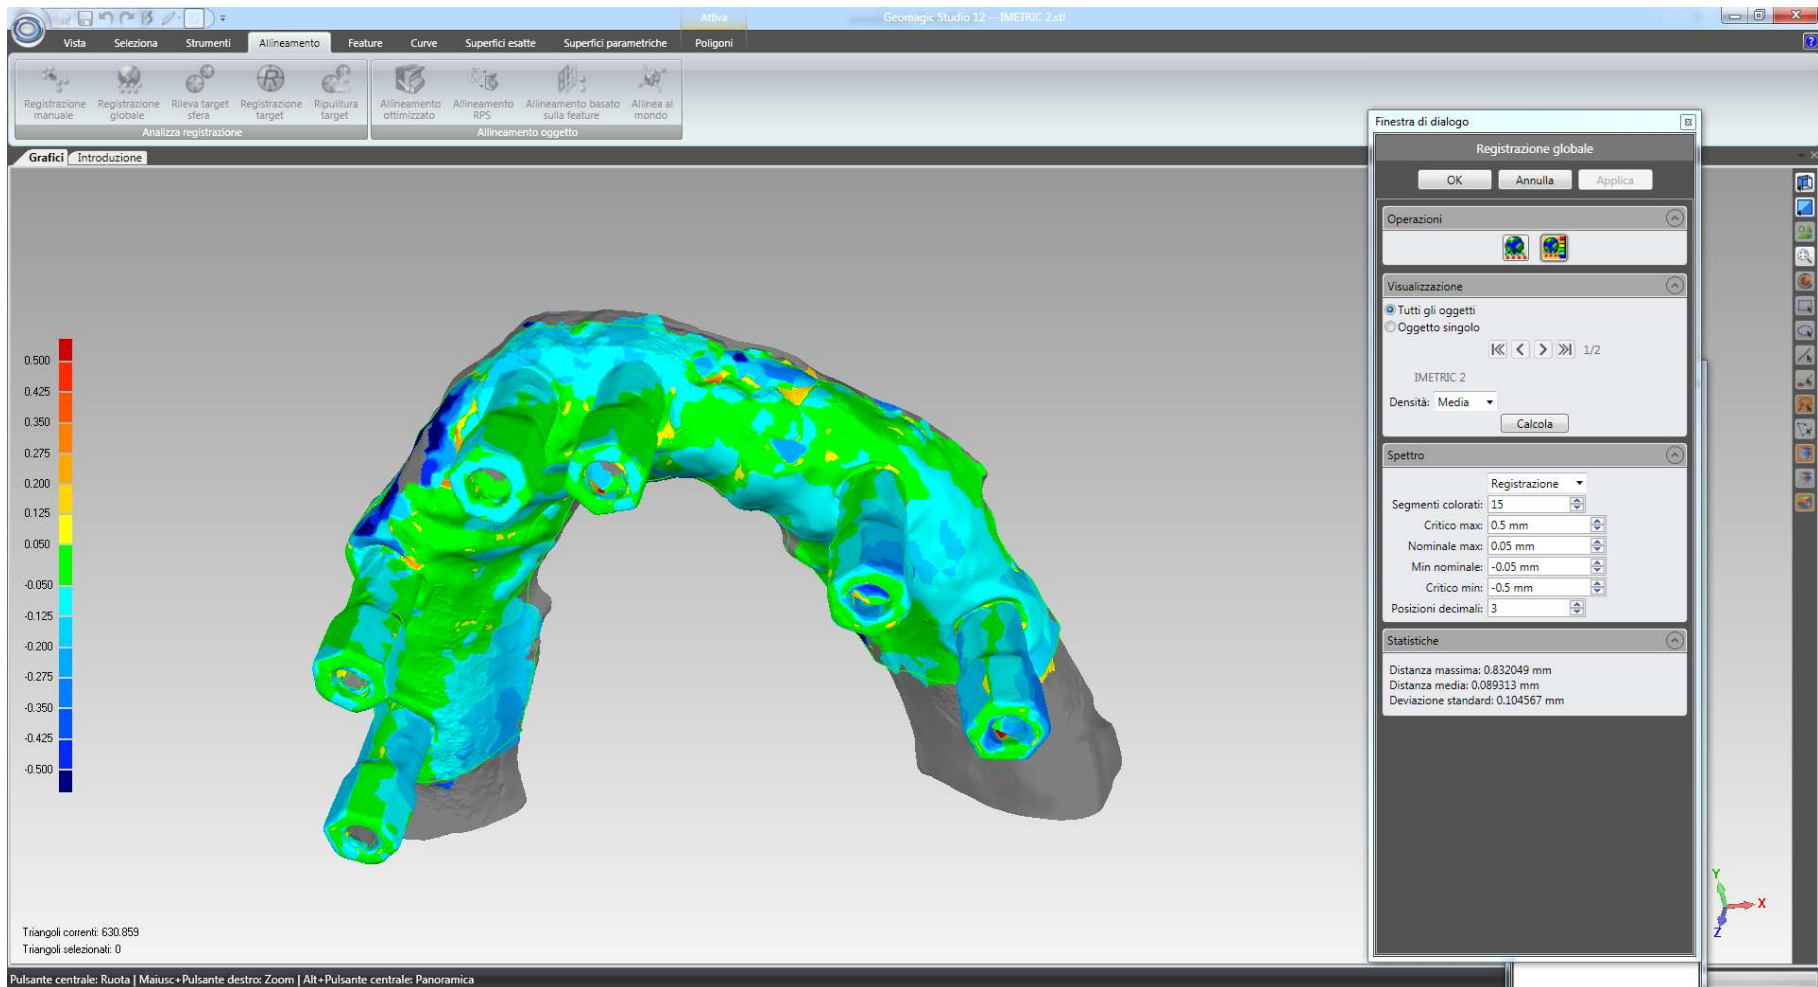

# ZFX 4 vs REF (IMETRIC)

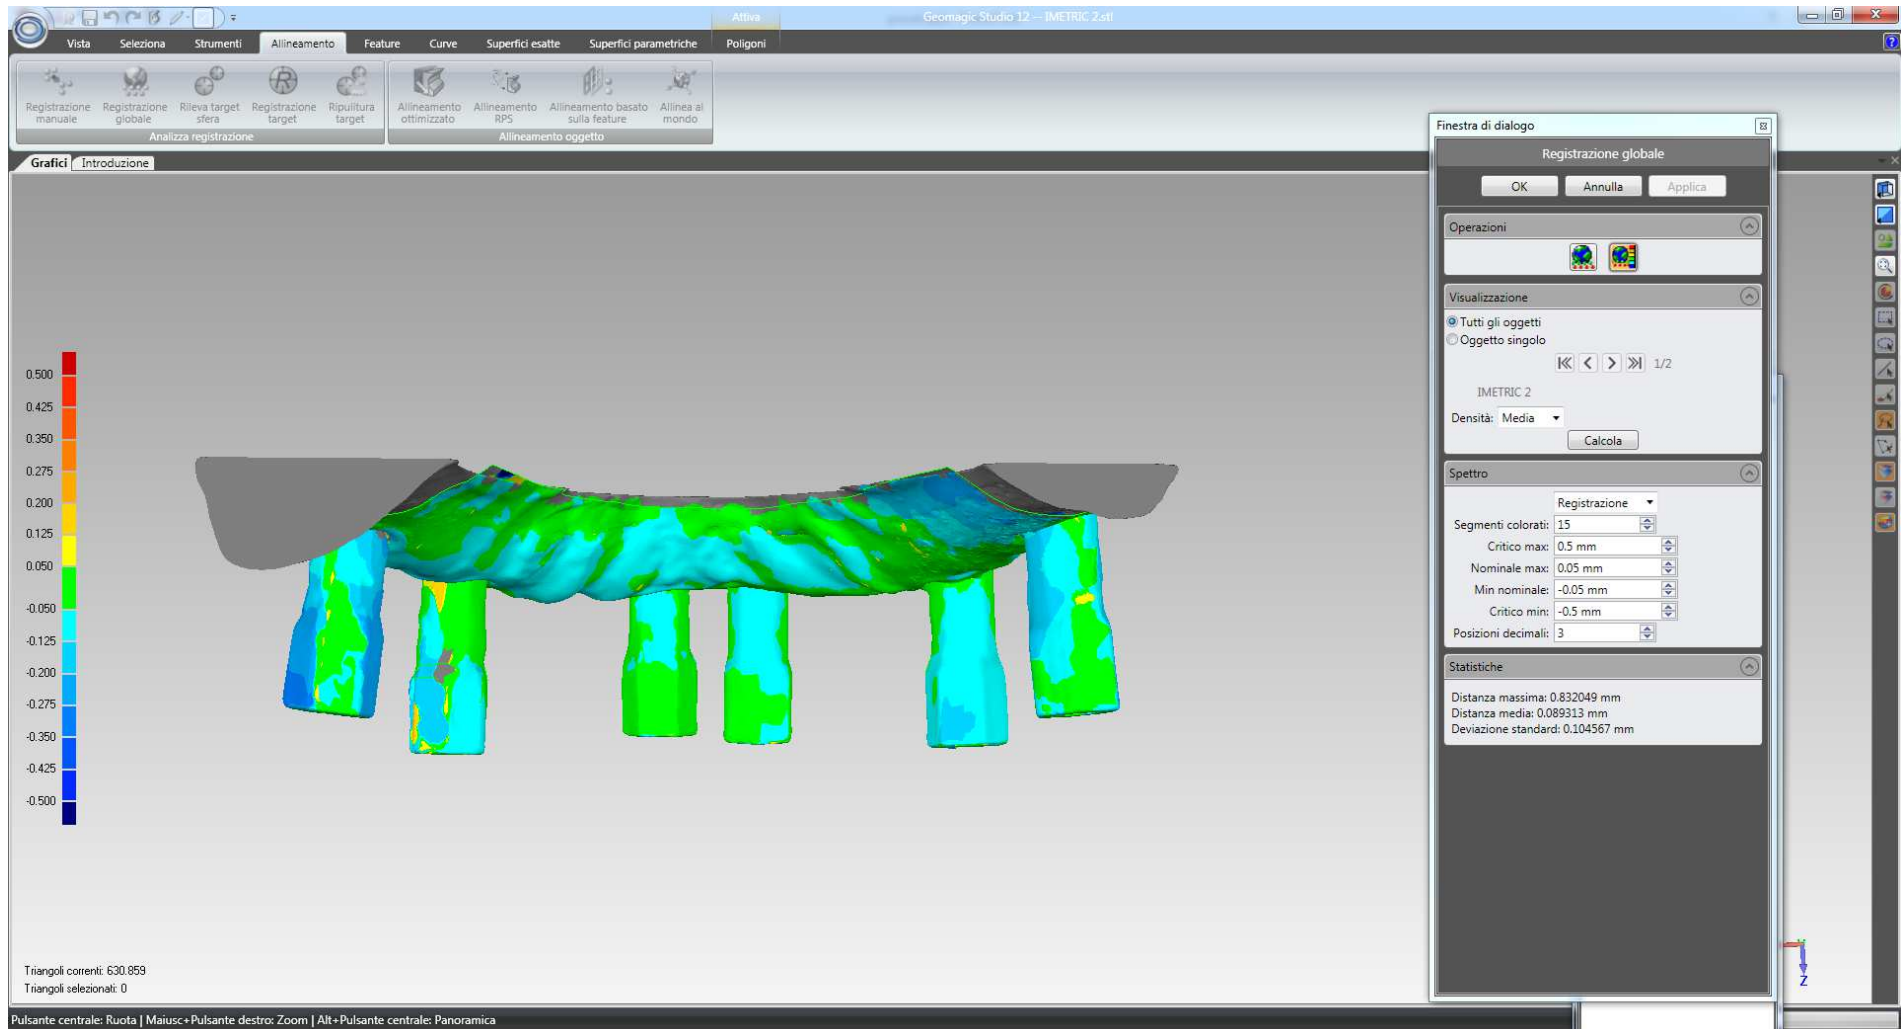

# ZFX 5 vs REF (IMETRIC)

Geomagic Studio 12 -- IMETRIC 2.stl

Finestra di dialogo

Registrazione globale

OK Annulla Applica

Operazioni

Visualizzazione

Tutti gli oggetti  
 Oggetto singolo

IMETRIC 2

Densità: Media

Calcola

Spettro

Registrazione

Segmenti colorati: 15

Critico max: 0.5 mm

Nominale max: 0.05 mm

Min nominale: -0.05 mm

Critico min: -0.5 mm

Posizioni decimali: 3

Statistiche

Distanza massima: 0.836225 mm  
Distanza media: 0.087592 mm  
Deviazione standard: 0.093708 mm

Triangoli correnti: 636.377  
Triangoli selezionati: 0

Pulsante centrale: Ruota | Maiusc+Pulsante destro: Zoom | Alt+Pulsante centrale: Panoramica

# ZFX 5 vs REF (IMETRIC)

Geomagic Studio 12 -- IMETRIC 2.stl

Vista Selezione Strumenti Allineamento Feature Curve Superfici esatte Superfici parametriche Poligoni

Registrazione manuale Registrazione globale Rileva target sfera Registrazione target Ripulitura target Allineamento ottimizzato Allineamento RPS Allineamento basato sulla feature Allinea al mondo

Analizza registrazione Allineamento oggetto

Grafici Introduzione

0.500  
0.425  
0.350  
0.275  
0.200  
0.125  
0.050  
-0.050  
-0.125  
-0.200  
-0.275  
-0.350  
-0.425  
-0.500

Triangoli correnti: 636.377  
Triangoli selezionati: 0

Pulsante centrale: Ruota | Maiusc+Pulsante destro: Zoom | Alt+Pulsante centrale: Panoramica

Finestra di dialogo

Registrazione globale

OK Annulla Applica

Operazioni

Visualizzazione

Tutti gli oggetti  
 Oggetto singolo

IMETRIC 2

Densità: Media

Calcola

Spettro

Registrazione

Segmenti colorati: 15

Critico max: 0.5 mm

Nominale max: 0.05 mm

Min nominale: -0.05 mm

Critico min: -0.5 mm

Posizioni decimali: 3

Statistiche

Distanza massima: 0.836225 mm  
Distanza media: 0.087592 mm  
Deviazione standard: 0.093708 mm

X  
Y  
Z

# ZFX 5 vs REF (IMETRIC)

Geomagic Studio 12 -- IMETRIC.Zaf

Vista Selezione Strumenti Allineamento Feature Curve Superfici esatte Superfici parametriche Poligoni

Registrazione manuale Registrazione globale Rileva target sfera Registrazione target Ripulitura target Allineamento ottimizzato Allineamento RPS Allineamento basato sulla feature Allinea al mondo

Analizza registrazione Allineamento oggetto

Grafici Introduzione

0.500  
0.425  
0.350  
0.275  
0.200  
0.125  
0.050  
-0.050  
-0.125  
-0.200  
-0.275  
-0.350  
-0.425  
-0.500

Triangoli correnti: 636.377  
Triangoli selezionati: 0

Pulsante centrale: Ruota | Maiusc+Pulsante destro: Zoom | Alt+Pulsante centrale: Panoramica

Finestra di dialogo

Registrazione globale

OK Annulla Applica

Operazioni

Visualizzazione

Tutti gli oggetti  
 Oggetto singolo

IMETRIC 2

Densità: Media

Calcola

Spettro

Registrazione

Segmenti colorati: 15

Critico max: 0.5 mm

Nominale max: 0.05 mm

Min nominale: -0.05 mm

Critico min: -0.5 mm

Posizioni decimali: 3

Statistiche

Distanza massima: 0.836225 mm  
Distanza media: 0.087592 mm  
Deviazione standard: 0.093708 mm

# ZFX 5 vs REF (IMETRIC)

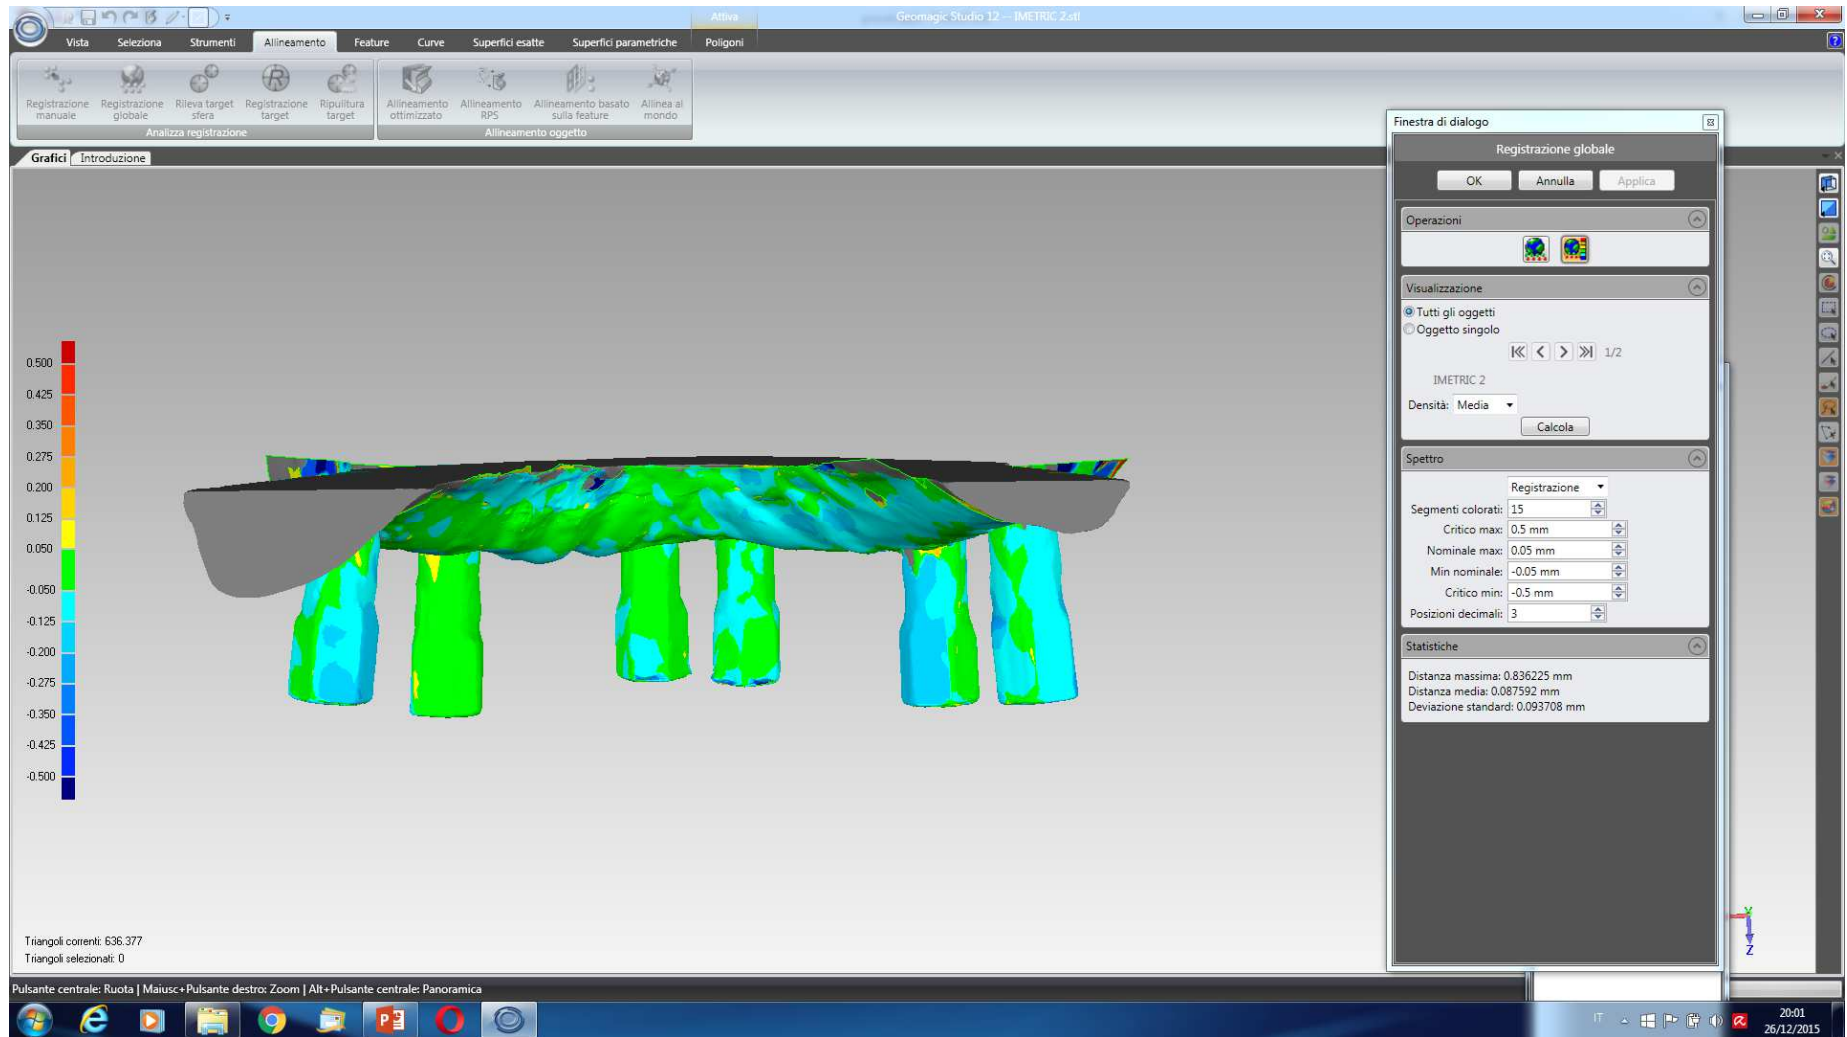

General trueness of Zfx Intrascan in the totally edentulous patient

|       | Mean distance | SD    | Maximum distance |
|-------|---------------|-------|------------------|
| Zfx 1 | 0.083         | 0.105 | 0.847            |
| Zfx 2 | 0.108         | 0.122 | 0.827            |
| Zfx 3 | 0.148         | 0.122 | 0.845            |
| Zfx 4 | 0.089         | 0.104 | 0.832            |
| Zfx 5 | 0.087         | 0.093 | 0.836            |

**Overall Zfx general accuracy: 0.103 (0.026)**

# Care 1 vs REF (IMETRIC)

Geomagic Studio 12 -- Carestream 1.stl

Vista Selezione Strumenti Allineamento Feature Curve Superfici esatte Superfici parametriche Poligoni

Registrazione manuale Registrazione globale Rileva target sfera Registrazione target Ripulitura target Allineamento ottimizzato Allineamento RPS Allineamento basato sulla feature Allinea al mondo

Analizza registrazione Allineamento oggetto

Grafici Introduzione

0.500  
0.425  
0.350  
0.275  
0.200  
0.125  
0.050  
-0.050  
-0.125  
-0.200  
-0.275  
-0.350  
-0.425  
-0.500

Triangoli correnti: 592.077  
Triangoli eliminati: 0

Finestra di dialogo

Registrazione globale

OK Annulla Applica

Operazioni

Visualizzazione

Tutti gli oggetti  
 Oggetto singolo

«< >» 1/2

Carestream 1

Densità: Media

Calcola

Spettro

Registrazione

Segmenti colorati: 15

Critico max: 0.5 mm

Nominale max: 0.05 mm

Min nominale: -0.05 mm

Critico min: -0.5 mm

Posizioni decimali: 3

Statistiche

Distanza massima: 0.830282 mm  
Distanza media: 0.061273 mm  
Deviazione standard: 0.096262 mm



# Care 1 vs REF (IMETRIC)

The screenshot displays the Geomagic Studio 12 interface. The main window shows a 3D model of a part with a color-coded deviation map. The color scale on the left ranges from -0.500 (blue) to 0.500 (red). The part has four vertical legs and a top flange. A dialog box on the right, titled "Finestra di dialogo" and "Registrazione globale", shows registration statistics for "Carestream 1".

**Registrazione globale**

OK Annulla Applica

Operazioni

Visualizzazione

Tutti gli oggetti  
 Oggetto singolo

Navigation icons: << < > >> 1/2

Carestream 1

Densità: Media

Calcola

Spettro

Registrazione

Segmenti colorati: 15

Critico max: 0.5 mm

Nominale max: 0.05 mm

Min nominale: -0.05 mm

Critico min: -0.5 mm

Posizioni decimali: 3

Statistiche

Distanza massima: 0.830262 mm  
Distanza media: 0.061273 mm  
Deviazione standard: 0.096262 mm

Triangoli correnti: 592.077  
Triangoli selezionati: 0

Pulsante centrale: Ruota | Maiusc+Pulsante destro: Zoom | Alt+Pulsante centrale: Panoramica

# Care 1 vs REF (IMETRIC)

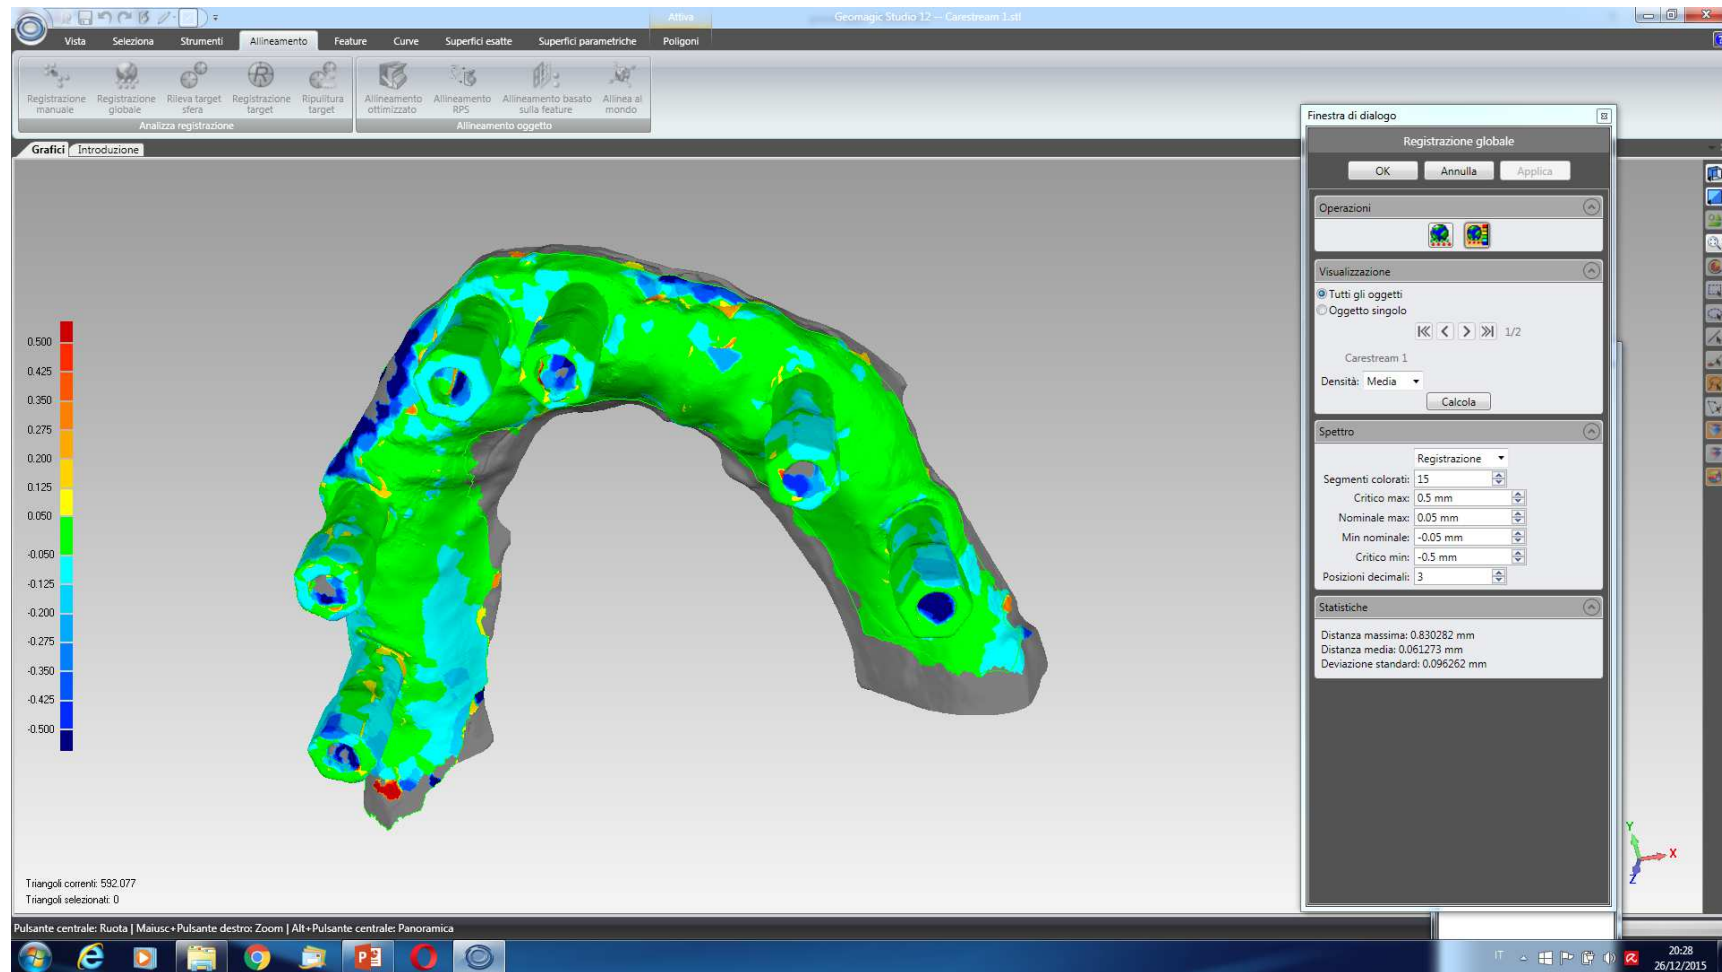

# Care 1 vs REF (IMETRIC)

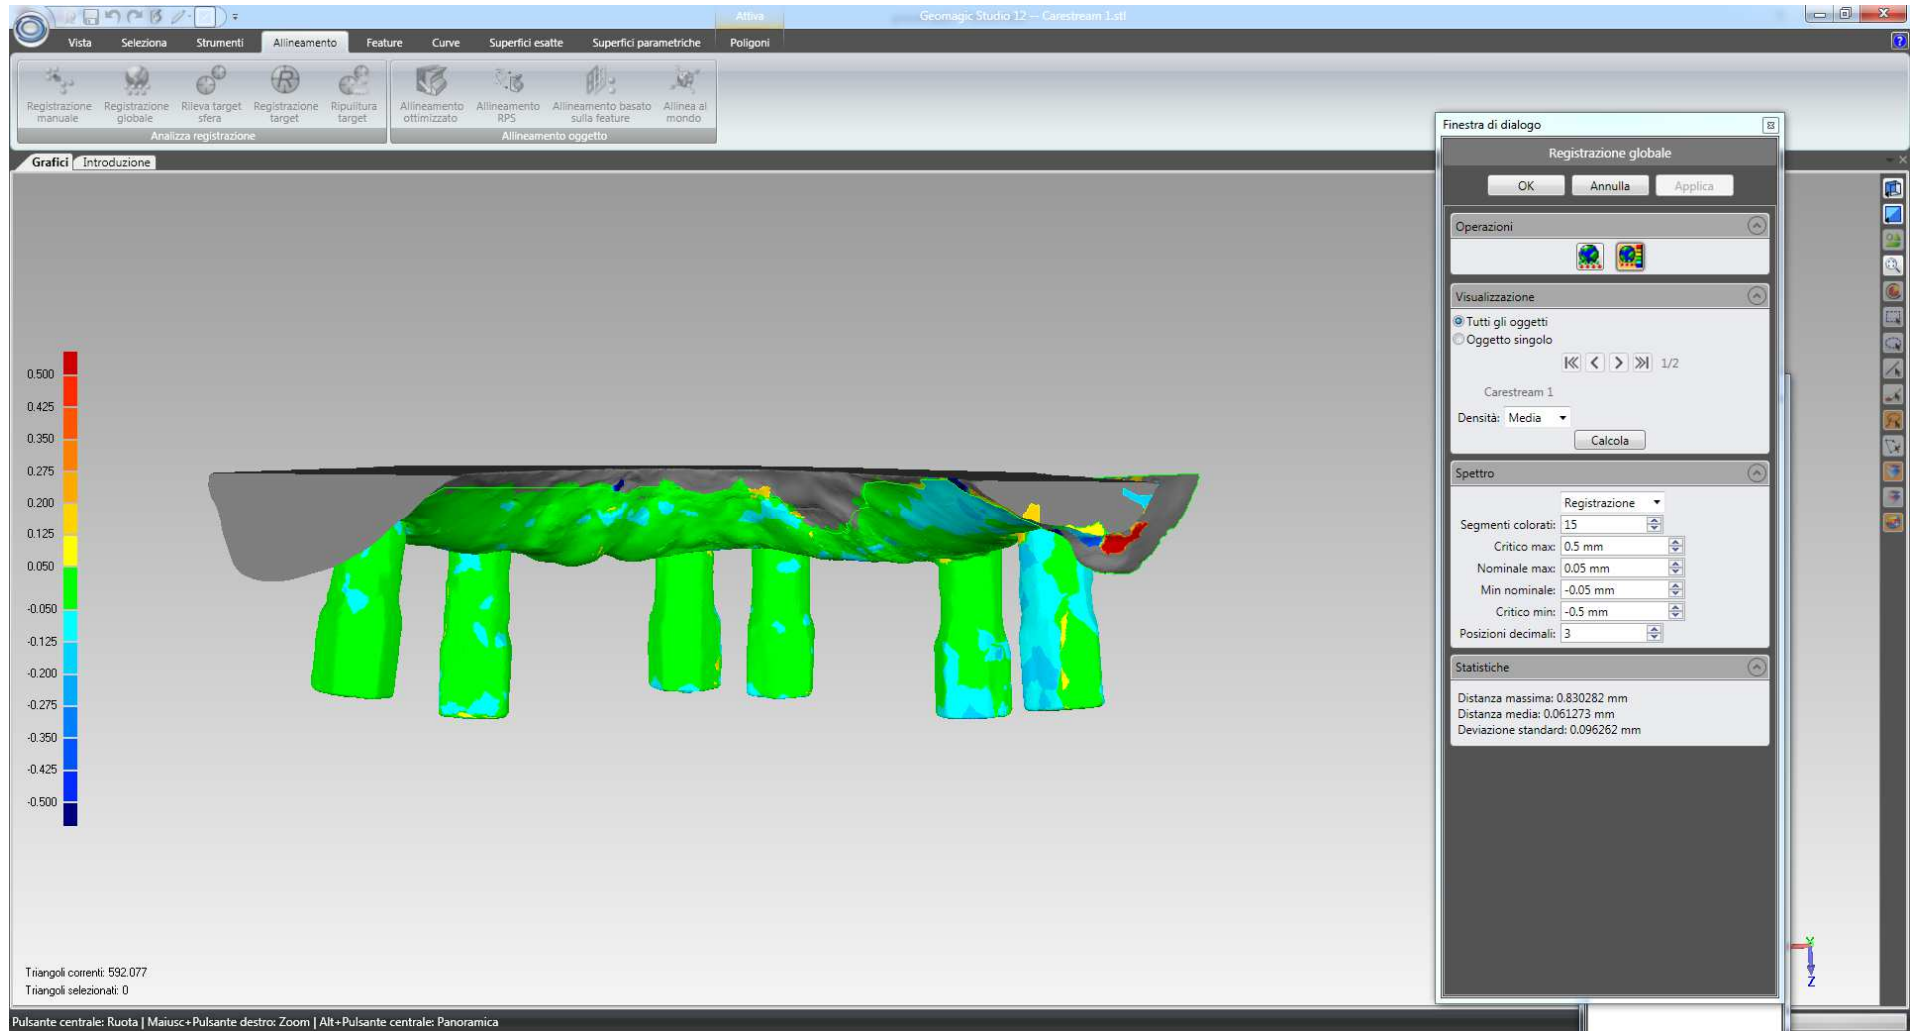

# Care 2 vs REF (IMETRIC)

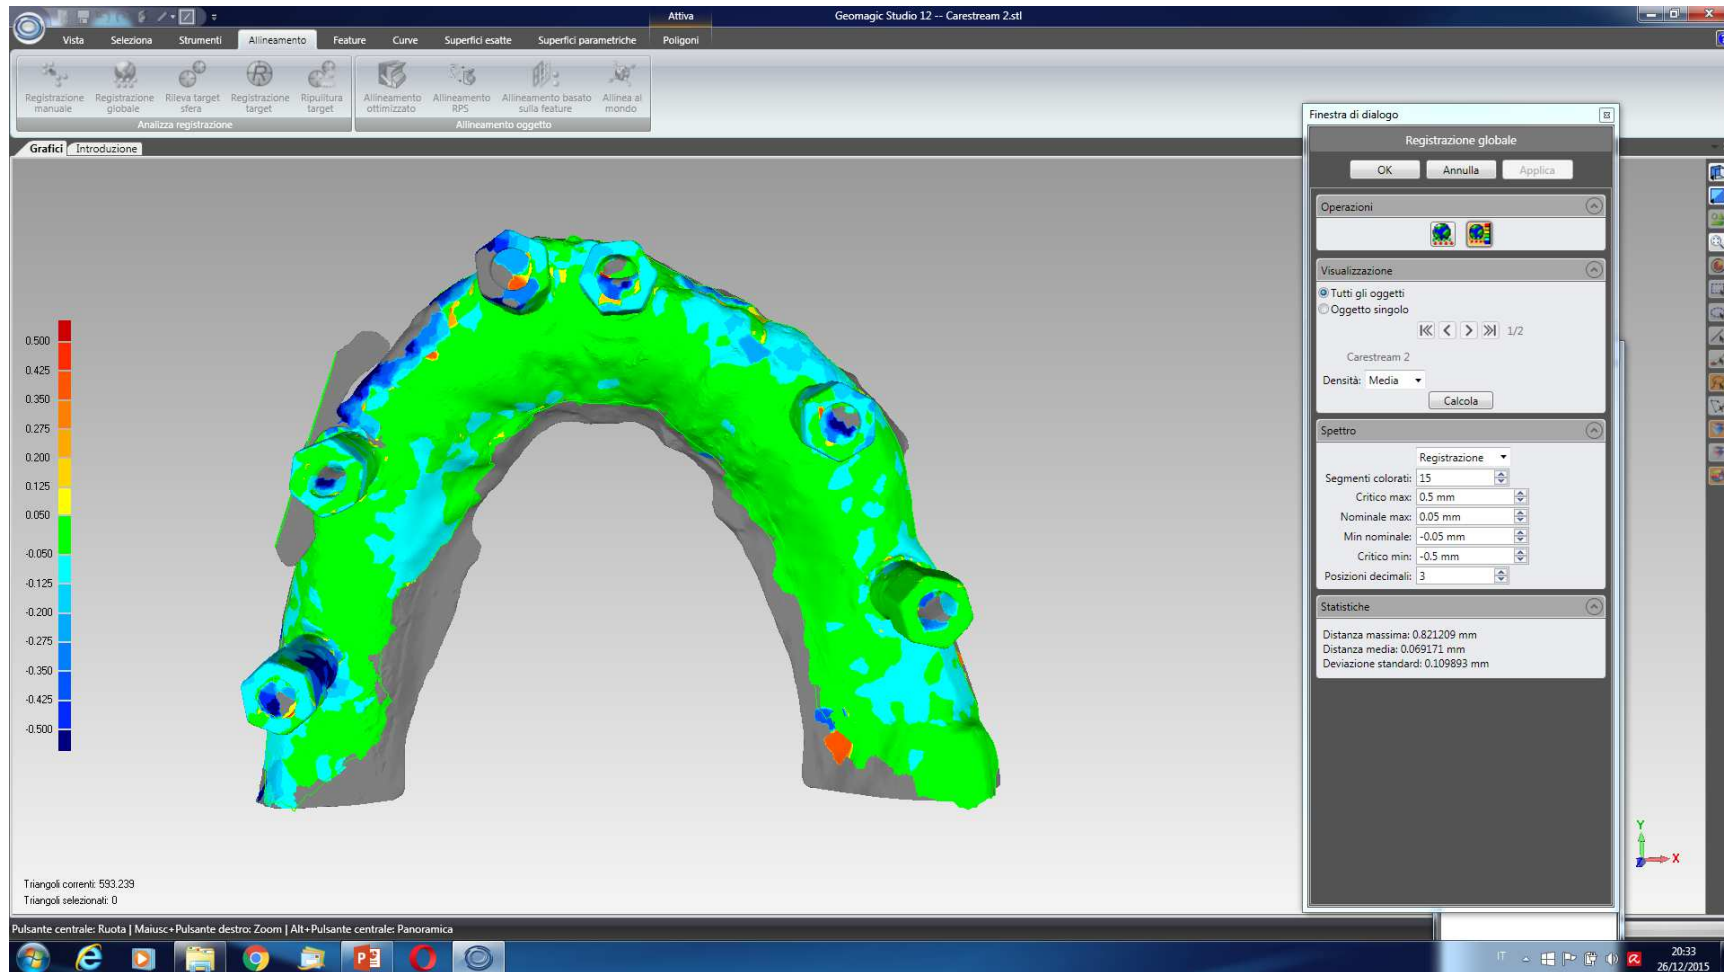

# Care 2 vs REF (IMETRIC)

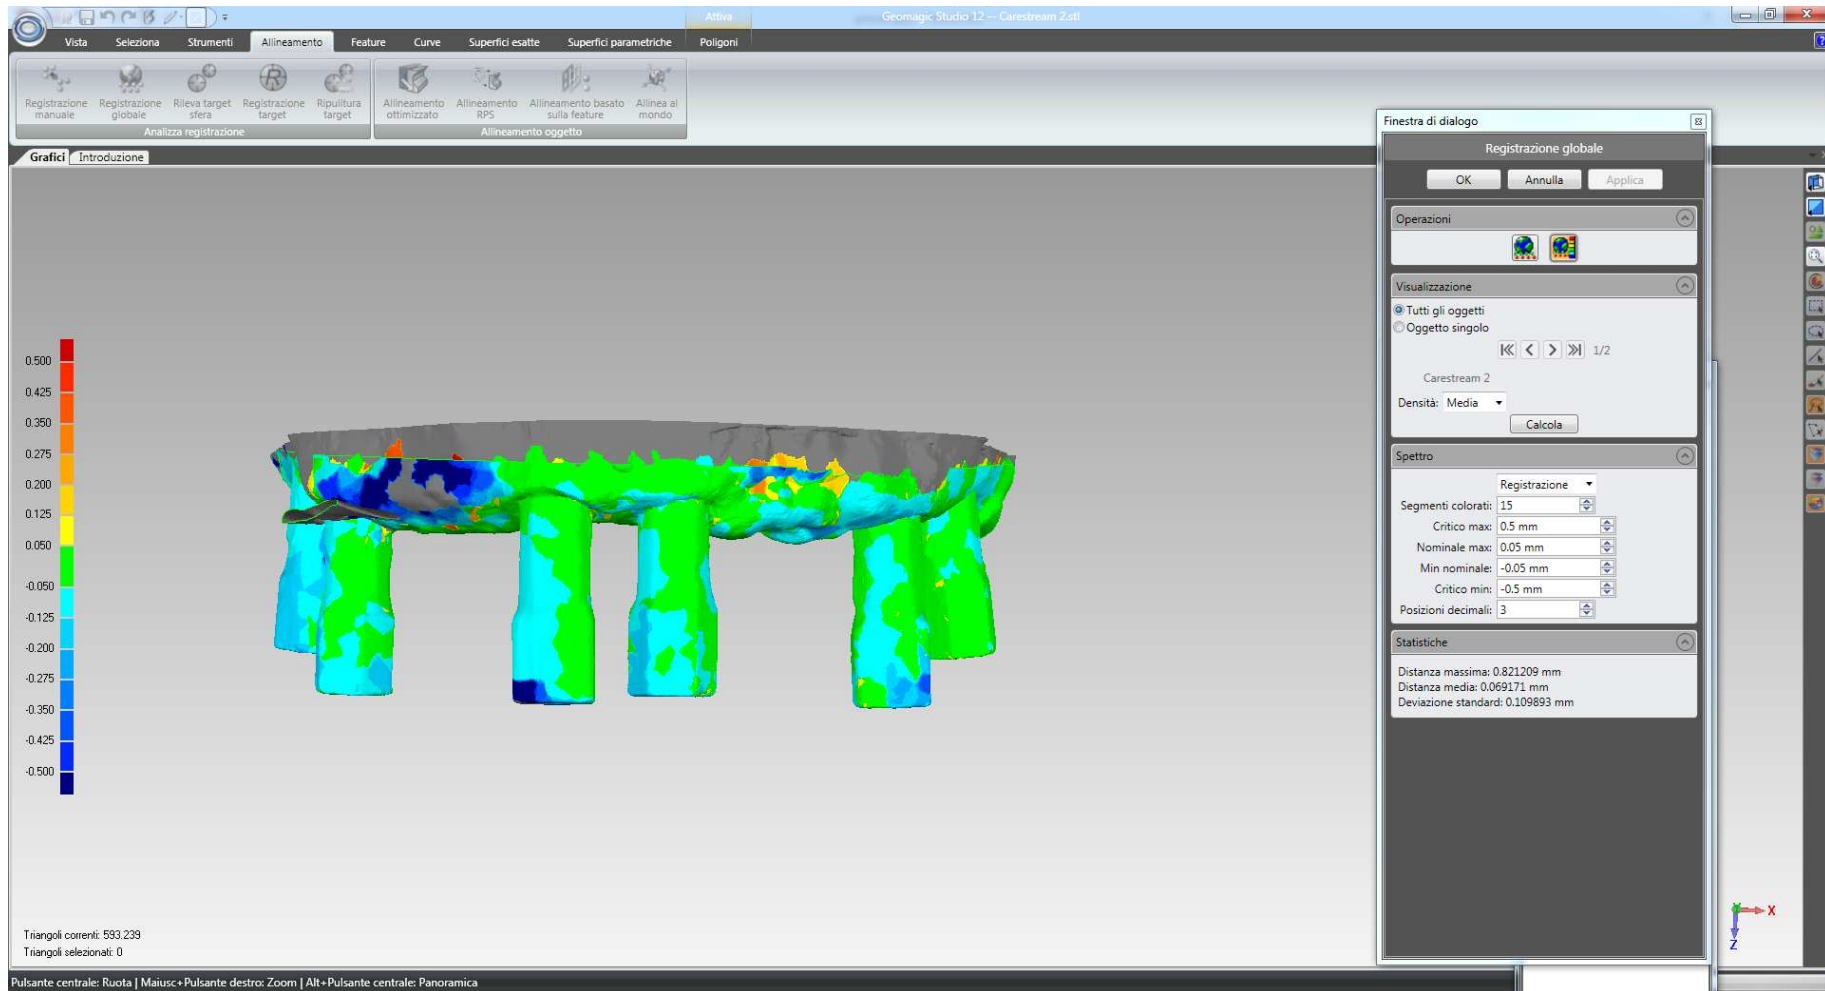

# Care 2 vs REF (IMETRIC)

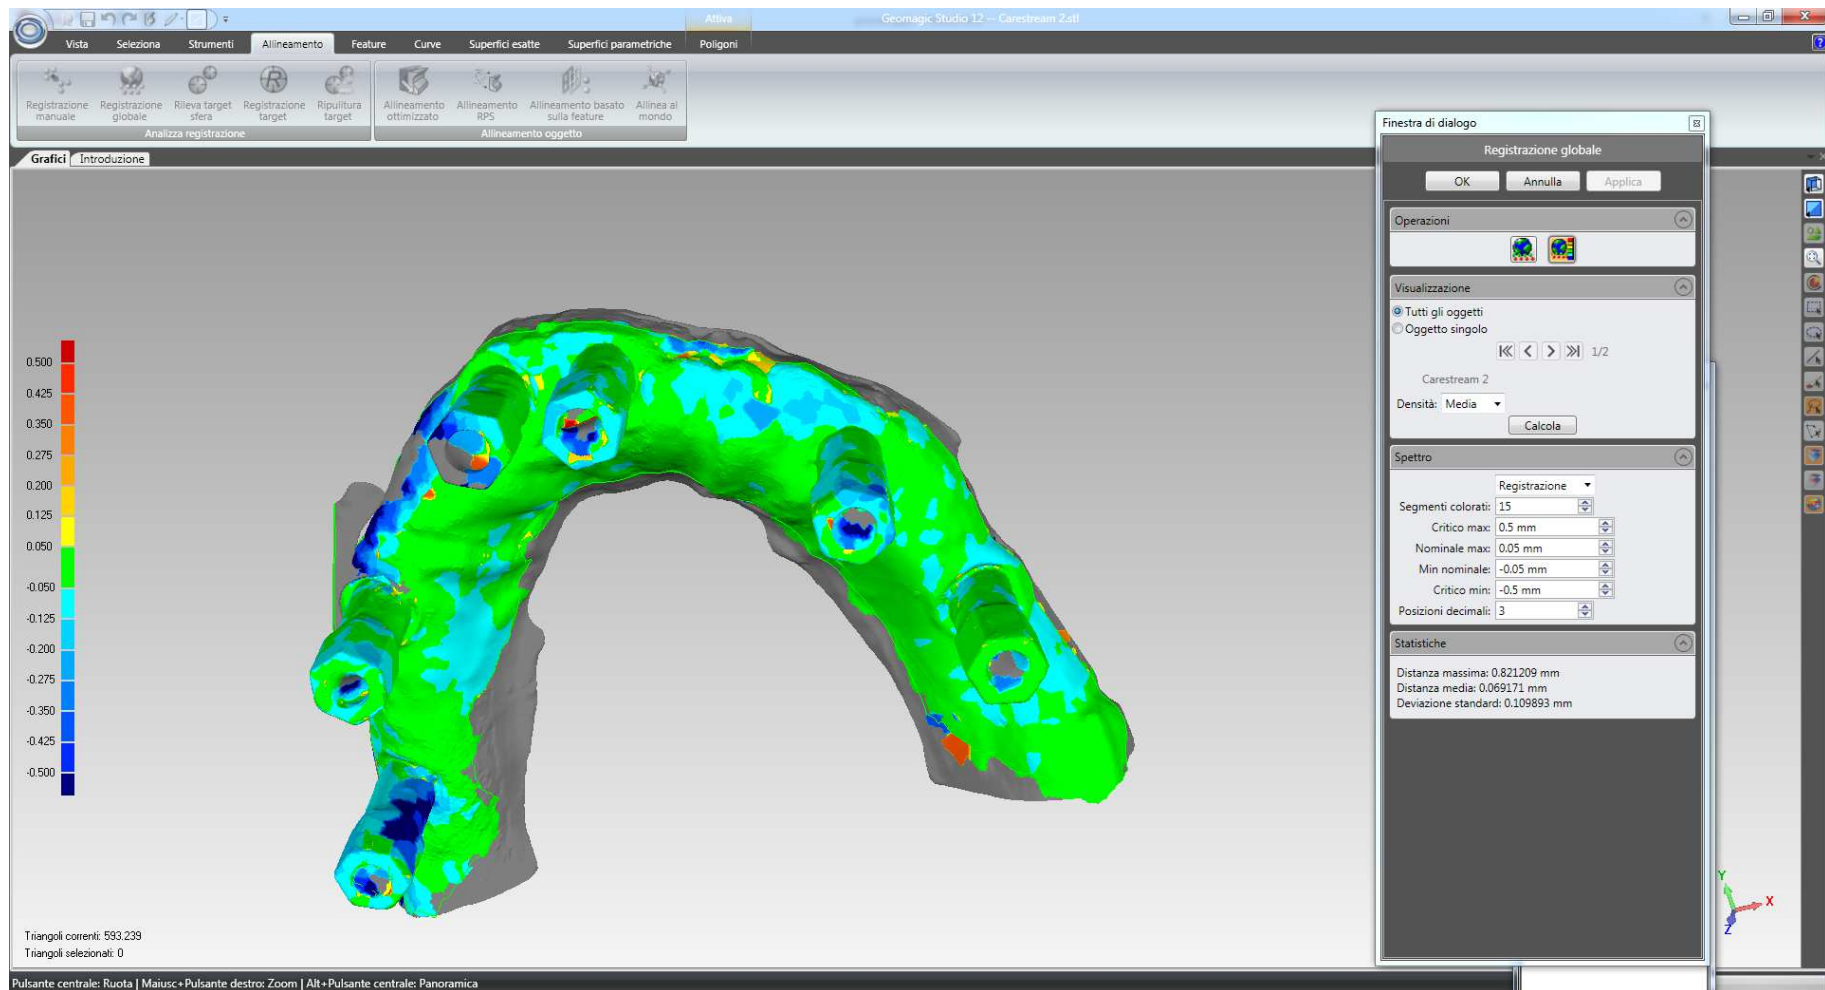

# Care 2 vs REF (IMETRIC)

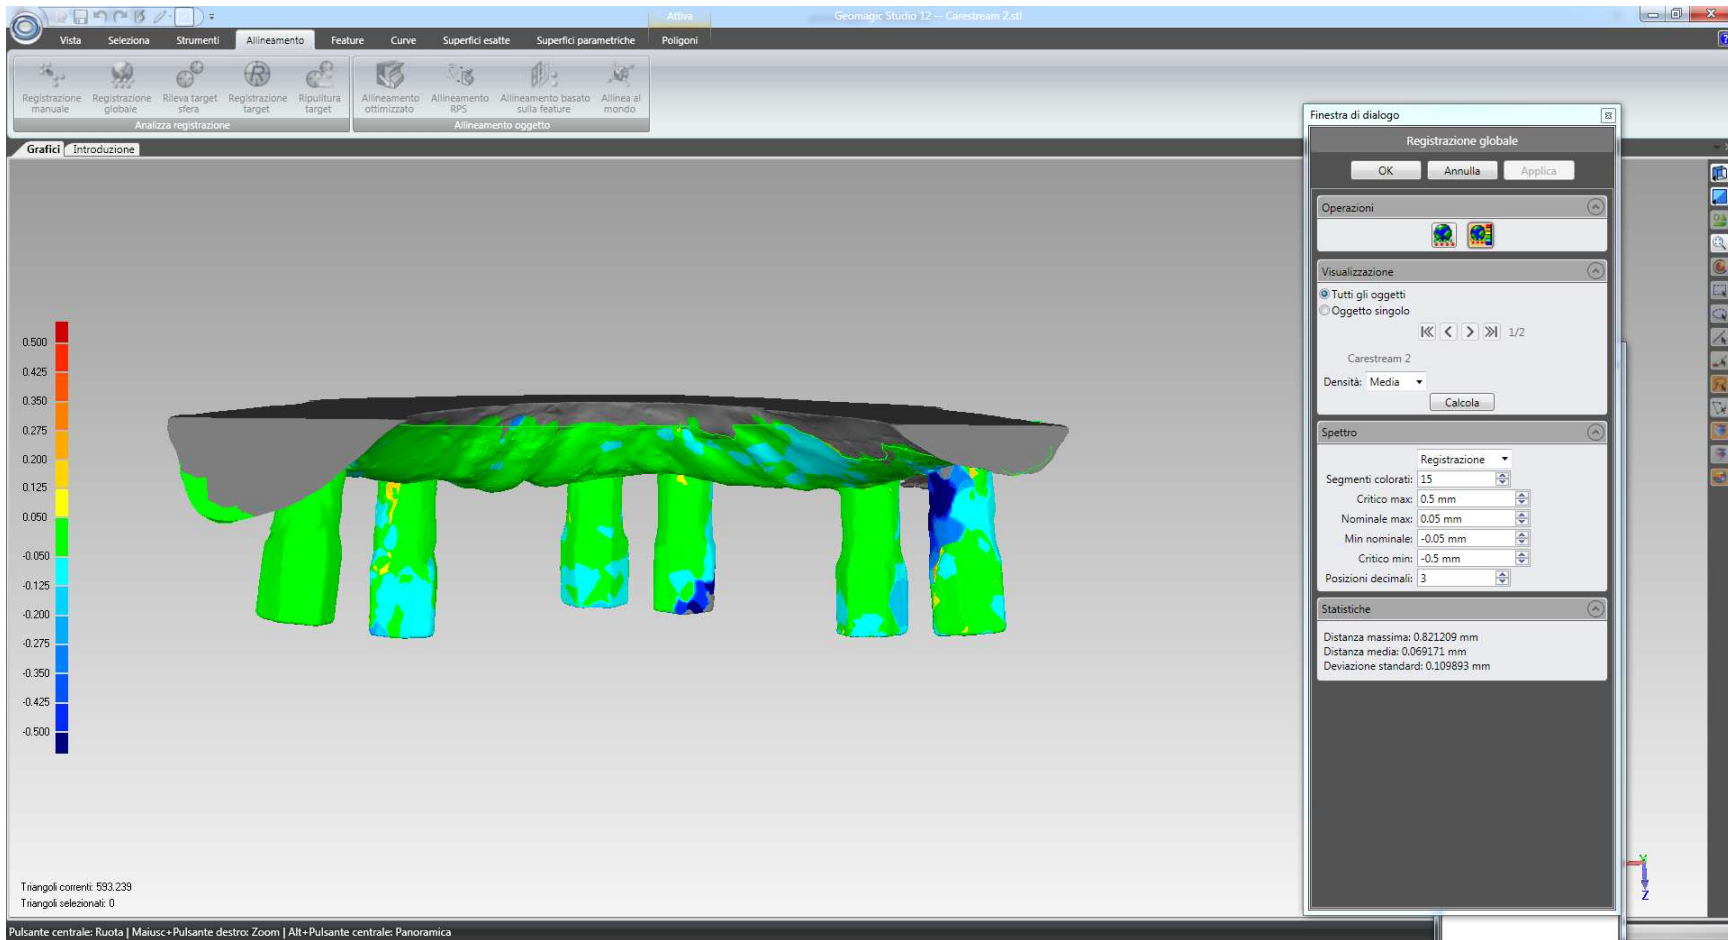

# Care 3 vs REF (IMETRIC)

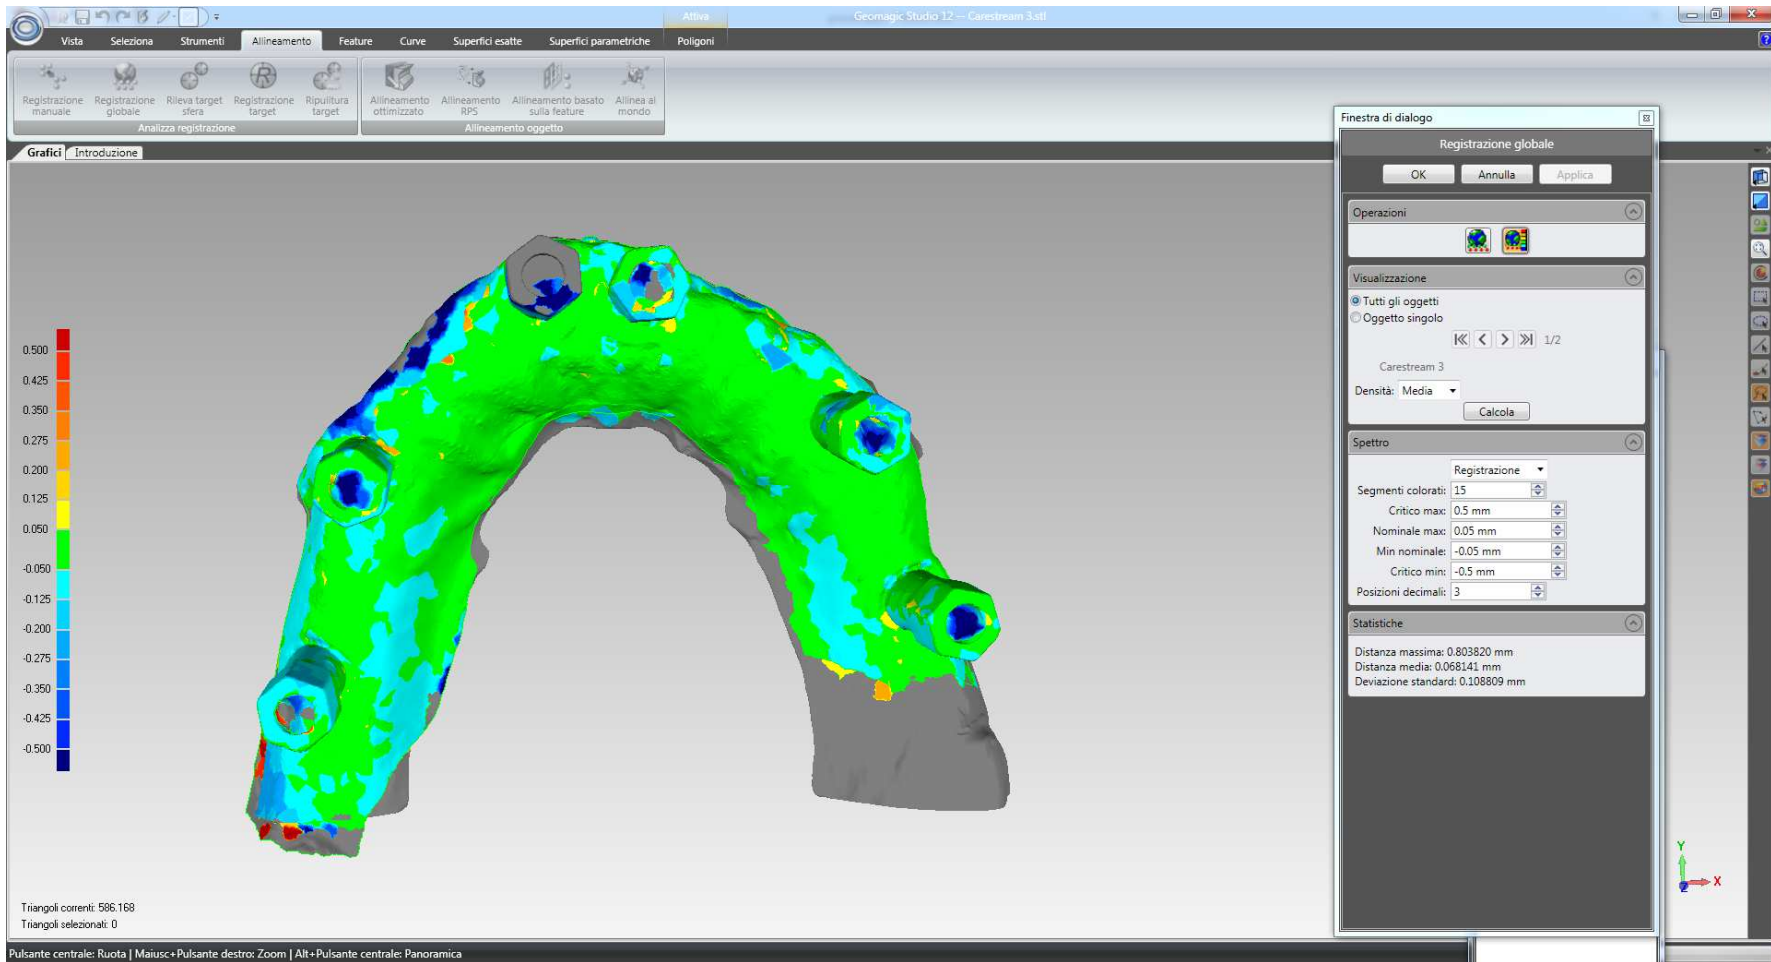



# Care 3 vs REF (IMETRIC)

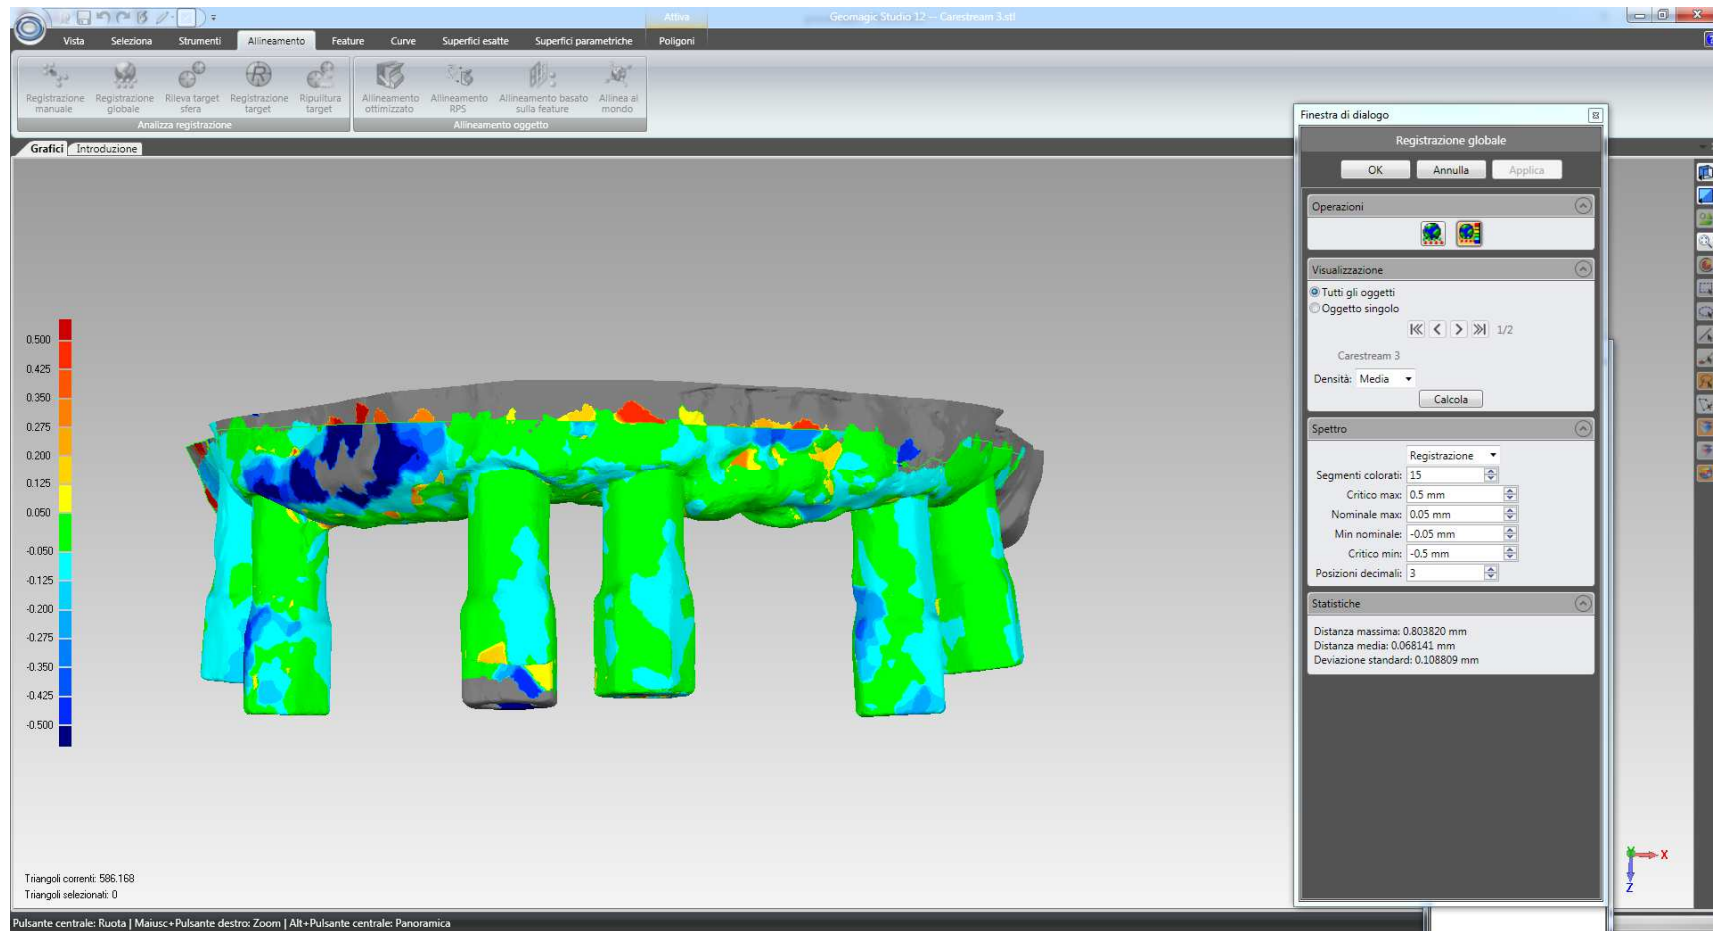

# Care 3 vs REF (IMETRIC)

Geomagic Studio 12 -- Carestream 3.stl

Vista Selezione Strumenti Allineamento Feature Curve Superfici esatte Superfici parametriche Poligoni

Registrazione manuale Registrazione globale Rileva target sfera Registrazione target Ripulitura target Analizza registrazione Allineamento ottimizzato Allineamento RMS Allineamento basato sulla feature Allinea al mondo Allineamento oggetto

Grafici Introduzione

0.500  
0.425  
0.350  
0.275  
0.200  
0.125  
0.050  
-0.050  
-0.125  
-0.200  
-0.275  
-0.350  
-0.425  
-0.500

Triangoli correnti: 586.168  
Triangoli selezionati: 0

Pulsante centrale: Ruota | Maiusc+Pulsante destro: Zoom | ALT+Pulsante centrale: Panoramica

Finestra di dialogo

Registrazione globale

OK Annulla Applica

Operazioni

Visualizzazione

Tutti gli oggetti  
 Oggetto singolo

«< >» 1/2

Carestream 3

Densità: Media

Calcola

Spettro

Registrazione

Segmenti colorati: 15

Critico max: 0.5 mm

Nominale max: 0.05 mm

Min nominale: -0.05 mm

Critico min: -0.5 mm

Posizioni decimali: 3

Statistiche

Distanza massima: 0.803820 mm  
Distanza media: 0.068141 mm  
Deviazione standard: 0.108809 mm

# Care 3 vs REF (IMETRIC)

Geomagic Studio 12 - Carestream 3.stl

Vista Selezione Strumenti Allineamento Feature Curve Superfici esatte Superfici parametriche Poligoni

Registrazione manuale Registrazione globale Rileva target sfera Registrazione target Ripulitura target Allineamento ottimizzato Allineamento RPS Allineamento basato sulla feature Allinea al mondo

Analizza registrazione Allineamento oggetto

Grafici Introduzione

0.500  
0.425  
0.350  
0.275  
0.200  
0.125  
0.050  
-0.050  
-0.125  
-0.200  
-0.275  
-0.350  
-0.425  
-0.500

Triangoli correnti: 586.168  
Triangoli selezionati: 0

Pulsante centrale: Ruota | Maiusc+Pulsante destro: Zoom | Alt+Pulsante centrale: Panoramica

Finestra di dialogo

Registrazione globale

OK Annulla Applica

Operazioni

Visualizzazione

Tutti gli oggetti  
 Oggetto singolo

«< >» 1/2

Carestream 3

Densità: Media

Calcola

Spettro

Registrazione

Segmenti colorati: 15

Critico max: 0.5 mm

Nominale max: 0.05 mm

Min nominale: -0.05 mm

Critico min: -0.5 mm

Posizioni decimali: 3

Statistiche

Distanza massima: 0.803820 mm  
Distanza media: 0.068141 mm  
Deviazione standard: 0.108809 mm

# Care 4 vs REF (IMETRIC)

Geomagic Studio 12 — Carestream 4.stl

Vista Seleziona Strumenti Allineamento Feature Curve Superfici esatte Superfici parametriche Poligoni

Registrazione manuale Registrazione globale Rileva target sfera Registrazione target Ripulitura target Analizza registrazione

Allineamento ottimizzato Allineamento RPS Allineamento basato sulla feature Allinea al mondo Allineamento oggetto

Grafici Introduzione

0.500  
0.425  
0.350  
0.275  
0.200  
0.125  
0.050  
-0.050  
-0.125  
-0.200  
-0.275  
-0.350  
-0.425  
-0.500

Triangoli correnti: 594.009  
Triangoli selezionati: 0

Pulsante centrale: Ruota | Maiusc+Pulsante destro: Zoom | Alt+Pulsante centrale: Panoramica

Finestra di dialogo

Registrazione globale

OK Annulla Applica

Operazioni

Visualizzazione

Tutti gli oggetti  
 Oggetto singolo

« < > » 1/2

Carestream 4

Densità: Media

Calcola

Spettro

Registrazione

Segmenti colorati: 15

Critico max: 0.5 mm

Nominale max: 0.05 mm

Min nominale: -0.05 mm

Critico min: -0.5 mm

Posizioni decimali: 3

Statistiche

Distanza massima: 0.816594 mm  
Distanza media: 0.051523 mm  
Deviazione standard: 0.088284 mm

# Care 4 vs REF (IMETRIC)

Geomagic Studio 12 — Carestream 4.stl

Vista Selezione Strumenti Allineamento Feature Curve Superfici esatte Superfici parametriche Poigoni

Registrazione manuale Registrazione globale Rileva target sfera Registrazione target Ripulitura target Allineamento ottimizzato Allineamento GPS Allineamento basato sulla feature Allinea al mondo

Analizza registrazione

Grfici Introduzione

0.500  
0.425  
0.390  
0.275  
0.200  
0.125  
0.050  
-0.050  
-0.125  
-0.200  
-0.275  
-0.350  
-0.425  
-0.500

Triangoli correnti: 534.003  
Triangoli selezionati: 0

Pulsante centrale: Ruota | Maiusc+Pulsante destro: Zoom | Alt+Pulsante centrale: Panoramica

Finestra di dialogo

Registrazione globale

OK Annulla Applica

Operazioni

Visualizzazione

Tutti gli oggetti  
 Oggetto singolo

1/2

Carestream 4

Densità: Media

Calcola

Spettro

Registrazione

Segmenti colorati: 15

Critico max: 0.5 mm

Nominale max: 0.05 mm

Min nominale: -0.05 mm

Critico min: -0.5 mm

Posizioni decimali: 3

Statistiche

Distanza massima: 0.816594 mm  
Distanza media: 0.051523 mm  
Deviazione standard: 0.088284 mm

# Care 4 vs REF (IMETRIC)

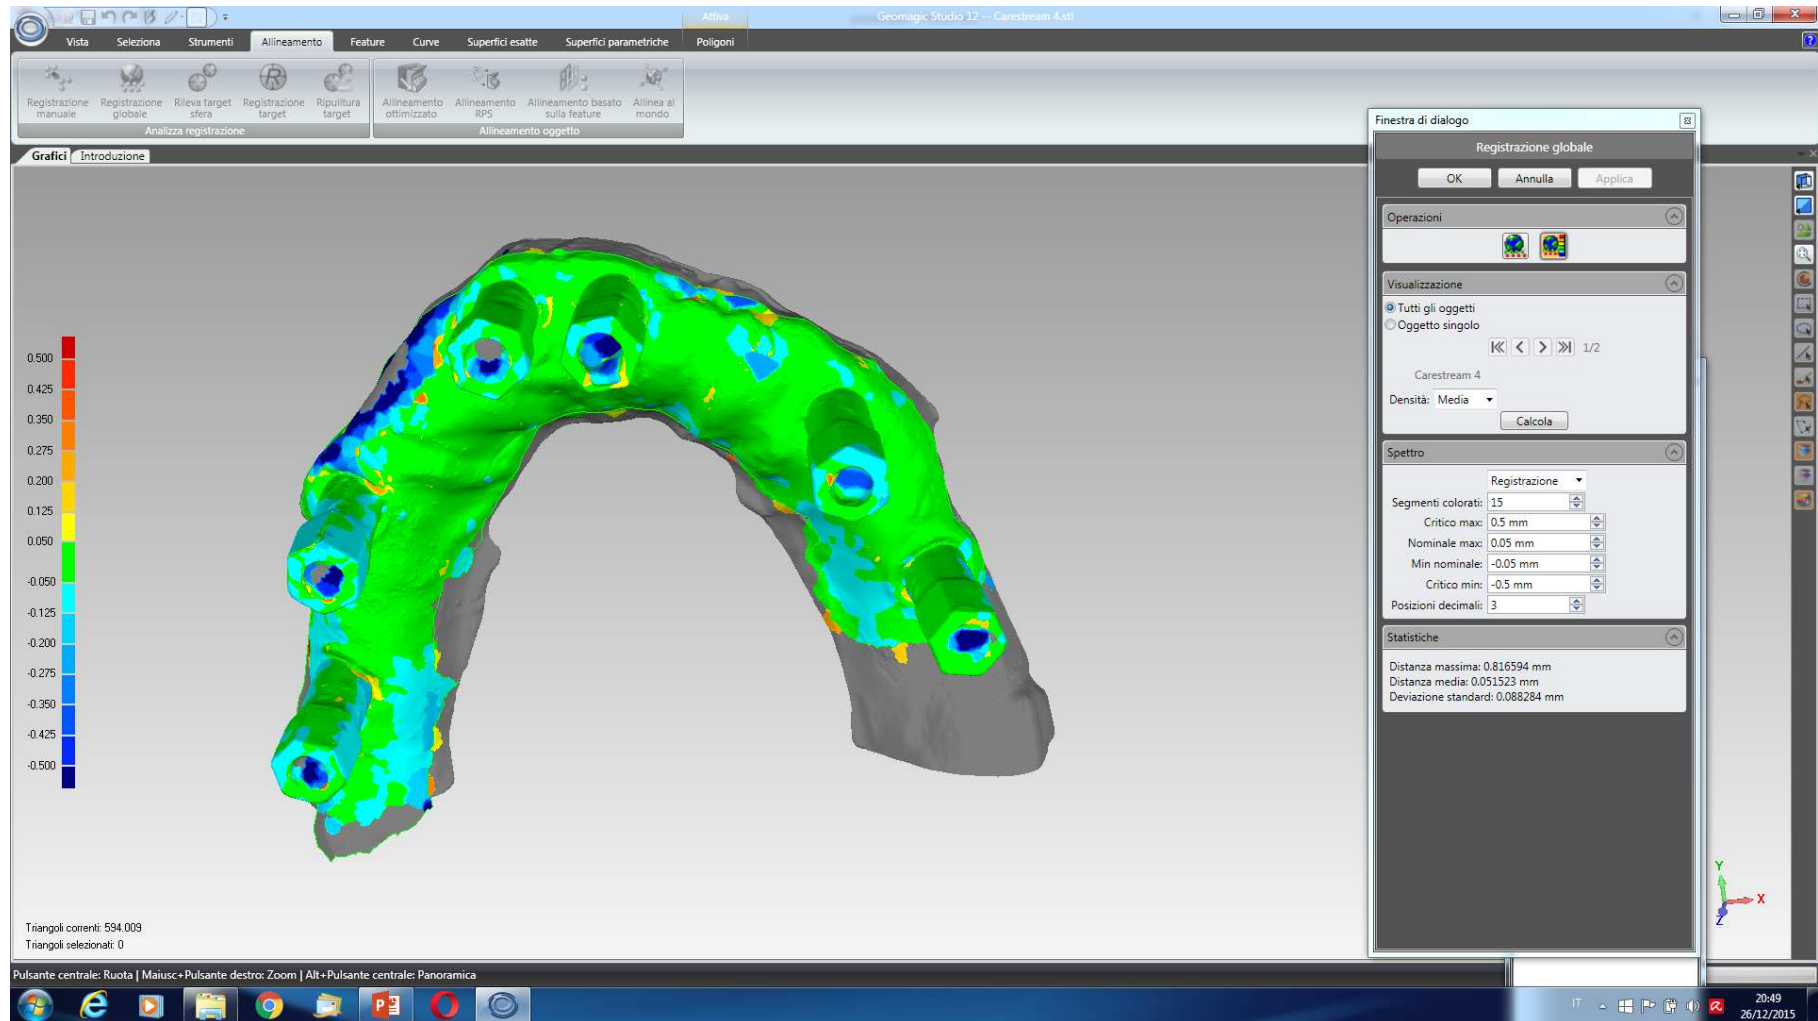

# Care 4 vs REF (IMETRIC)

The screenshot displays the Geomagic Studio 12 interface. The main window shows a 3D model of a dental arch with a color-coded deviation map. The color scale on the left ranges from -0.500 to 0.500 mm. The model is supported by several vertical pillars. A dialog box on the right shows registration statistics.

**Finestra di dialogo: Registrazione globale**

OK Annulla Applica

Operazioni

Visualizzazione

Tutti gli oggetti  
 Oggetto singolo

«< >» 1/2

Carestream 4

Densità: Media

Calcola

Spettro

Registrazione

Segmenti colorati: 15

Critico max: 0.5 mm

Nominale max: 0.05 mm

Min nominale: -0.05 mm

Critico min: -0.5 mm

Posizioni decimali: 3

Statistiche

Distanza massima: 0.816594 mm  
Distanza media: 0.051523 mm  
Deviazione standard: 0.088284 mm

Triangoli correnti: 594.009  
Triangoli selezionati: 0

Pulsante centrale: Ruota | Maiusc+Pulsante destro: Zoom | Alt+Pulsante centrale: Panoramica

# Care 5 vs REF (IMETRIC)

The screenshot displays the Geomagic Studio 12 interface. The main window shows a 3D model of a curved, arch-like part with a color-coded deviation map. The color scale on the left ranges from -0.500 (blue) to 0.500 (red). The model is primarily green and cyan, indicating deviations between -0.125 and 0.125 mm. The top toolbar includes various alignment and registration tools. The 'Finestra di dialogo' (Dialog Box) for 'Registrazione globale' (Global Registration) is open on the right, showing the following settings and statistics:

**Registrazione globale**

OK Annulla Applica

Operazioni

Visualizzazione

Tutti gli oggetti  
 Oggetto singolo

Carestream 5

Densità: Media

Calcola

Spettro

Registrazione

Segmenti colorati: 15

Critico max: 0.5 mm

Nominale max: 0.05 mm

Min nominale: -0.05 mm

Critico min: -0.5 mm

Posizioni decimali: 3

Statistiche

Distanza massima: 0.848214 mm

Distanza media: 0.067239 mm

Deviazione standard: 0.098409 mm

Triangoli correnti: 605.092  
Triangoli selezionati: 0

Pulsante centrale: Ruota | Maiusc+Pulsante destro: Zoom | Alt+Pulsante centrale: Panoramica

08:43  
27/12/2015



# Care 5 vs REF (IMETRIC)

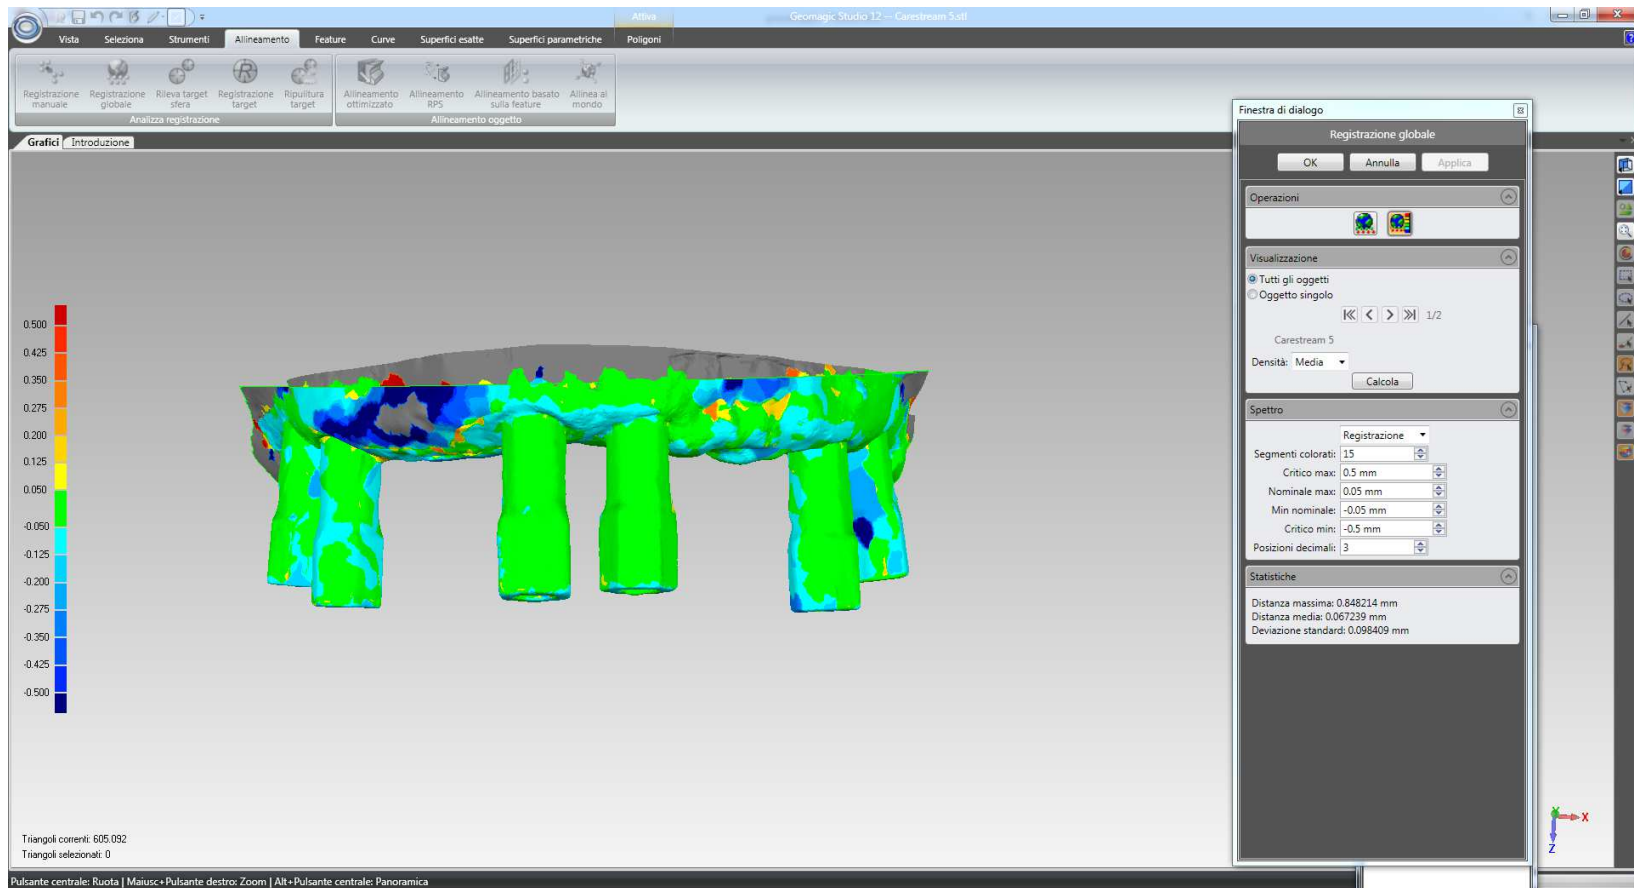

# Care 5 vs REF (IMETRIC)

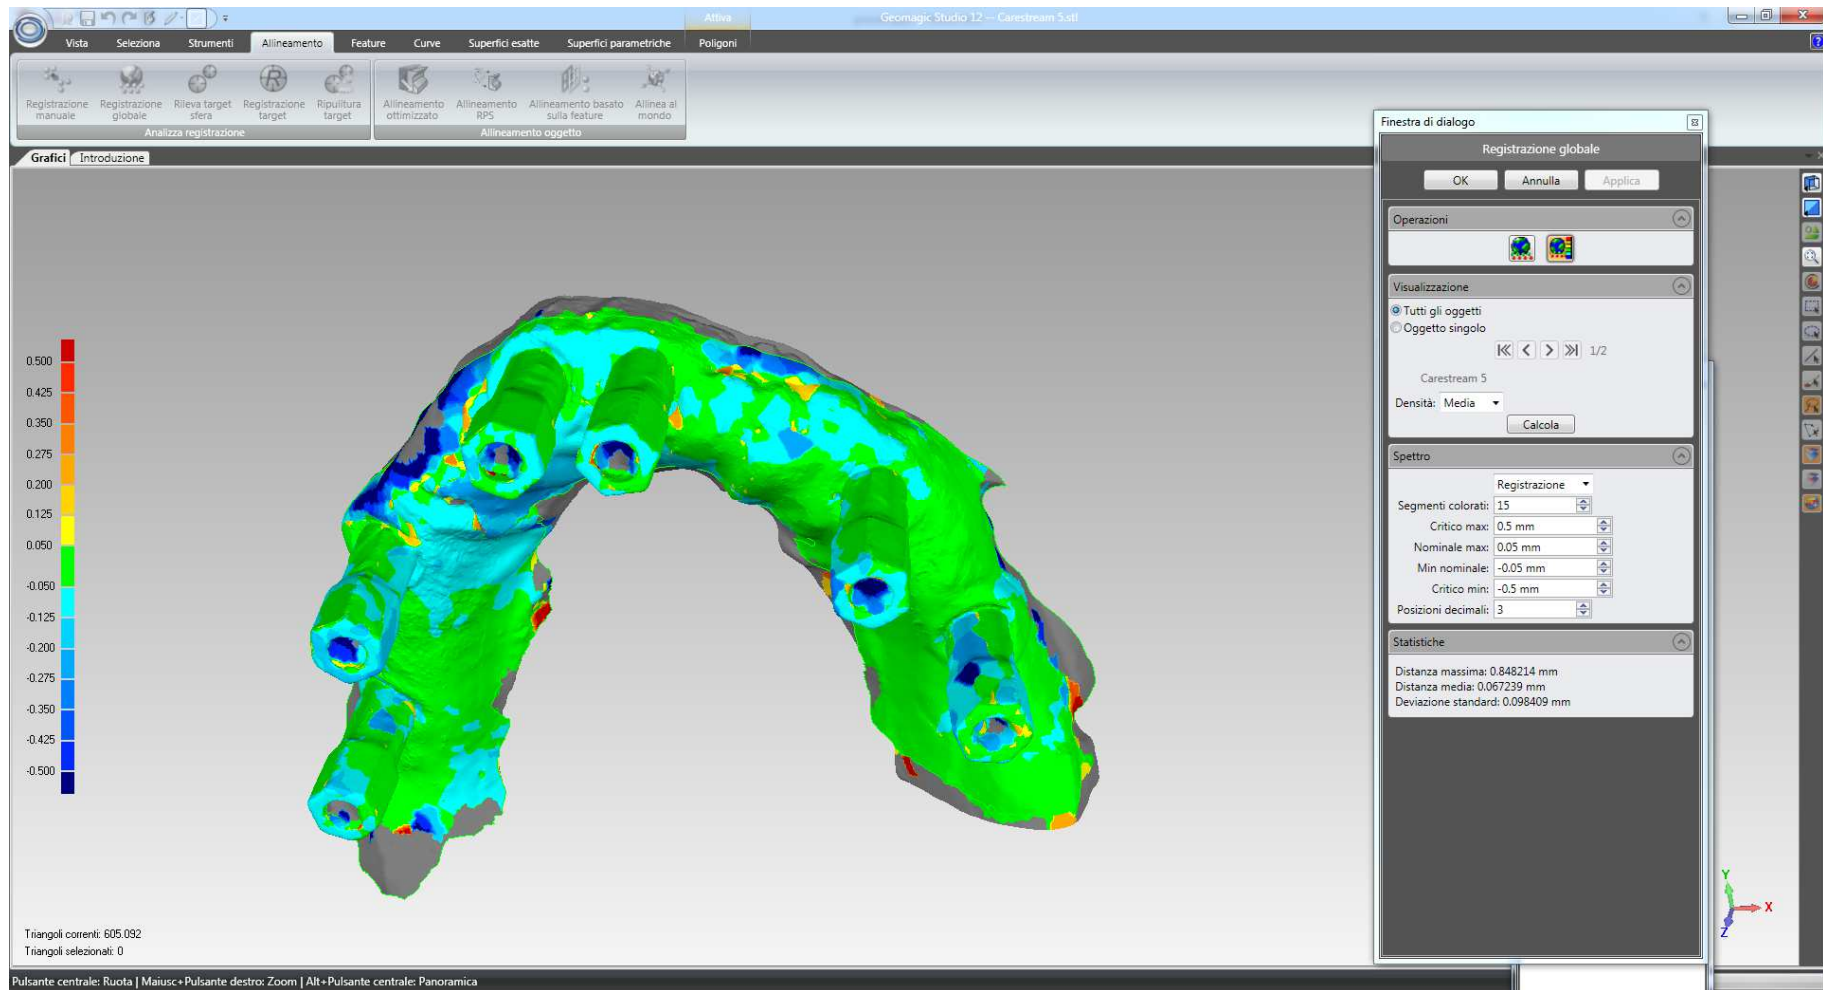

# Care 5 vs REF (IMETRIC)

The screenshot displays the Geomagic Studio 12 interface. The main window shows a 3D model of a mechanical part with a color-coded surface deviation map. The model is supported by five vertical pillars. A vertical color scale on the left ranges from -0.500 (blue) to 0.500 (red). The top menu bar includes options like Vista, Selezione, Strumenti, Allineamento, Feature, Curve, Superfici esatte, Superfici parametriche, and Poligoni. The toolbar below the menu bar contains various registration and alignment tools. The bottom status bar shows the number of current triangles (605,092) and selected triangles (0).

**Finestra di dialogo: Registrazione globale**

OK Annulla Applica

Operazioni

Visualizzazione

Tutti gli oggetti  
 Oggetto singolo

Navigation icons: << < > >> 1/2

Carestream 5

Densità: Media

Calcola

Spettro

Registrazione

Segmenti colorati: 15

Critico max: 0.5 mm

Nominale max: 0.05 mm

Min nominale: -0.05 mm

Critico min: -0.5 mm

Posizioni decimali: 3

Statistiche

Distanza massima: 0.848214 mm  
Distanza media: 0.067239 mm  
Deviazione standard: 0.098409 mm

Pulsante centrale: Ruota | Maiusc+Pulsante destro: Zoom | Alt+Pulsante centrale: Panoramica

General trueness of the Carestream intraoral scanner in the totally edentulous model

|              | Mean distance | SD    | Maximum distance |
|--------------|---------------|-------|------------------|
| Carestream 1 | 0.061         | 0.096 | 0.830            |
| Carestream 2 | 0.069         | 0.109 | 0.821            |
| Carestream 3 | 0.068         | 0.108 | 0.803            |
| Carestream 4 | 0.051         | 0.088 | 0.816            |
| Carestream 5 | 0.067         | 0.098 | 0.848            |

**Overall Care general accuracy: 0.063 (0.007)**

# Plan 1 vs REF (IMETRIC)

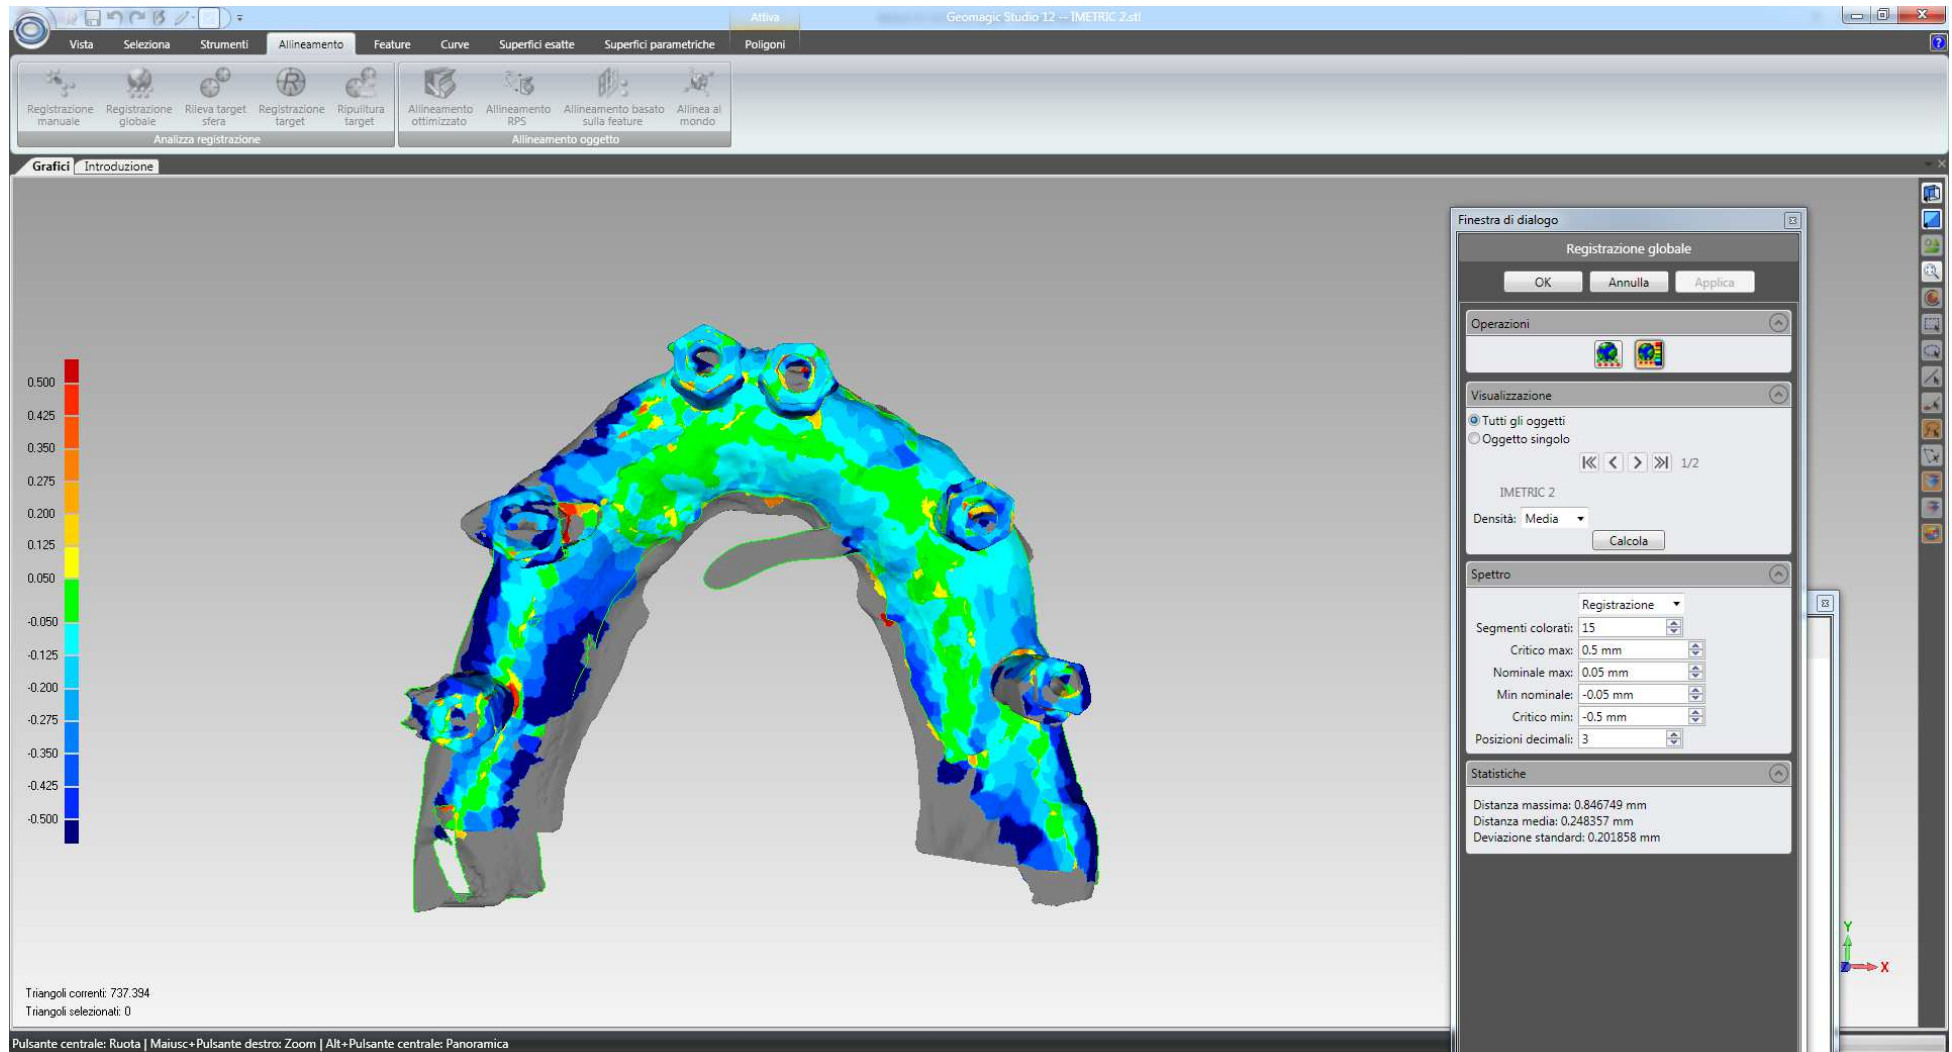

# Plan 1 vs REF (IMETRIC)

The screenshot displays the Geomagic Studio 12 interface. The main window shows a 3D model of a mechanical part with a color-coded deviation map. The color scale on the left ranges from -0.500 (blue) to 0.500 (red). The right side of the interface shows a 'Finestra di dialogo' (Dialog Window) for 'Registrazione globale' (Global Registration) with various settings and statistics.

**Finestra di dialogo: Registrazione globale**

OK Annulla Applica

Operazioni

Visualizzazione

Tutti gli oggetti  
 Oggetto singolo

IMETRIC 2

Densità: Media

Calcola

Spettro

Registrazione

Segmenti colorati: 15

Critico max: 0.5 mm

Nominale max: 0.05 mm

Min nominale: -0.05 mm

Critico min: -0.5 mm

Posizioni decimali: 3

Statistiche

Distanza massima: 0.846749 mm  
Distanza media: 0.248357 mm  
Deviazione standard: 0.201858 mm

Triangoli correnti: 737.394  
Triangoli selezionati: 0

Pulsante centrale: Ruota | Maiusc+Pulsante destro: Zoom | Alt+Pulsante centrale: Panoramica

# Plan 1 vs REF (IMETRIC)

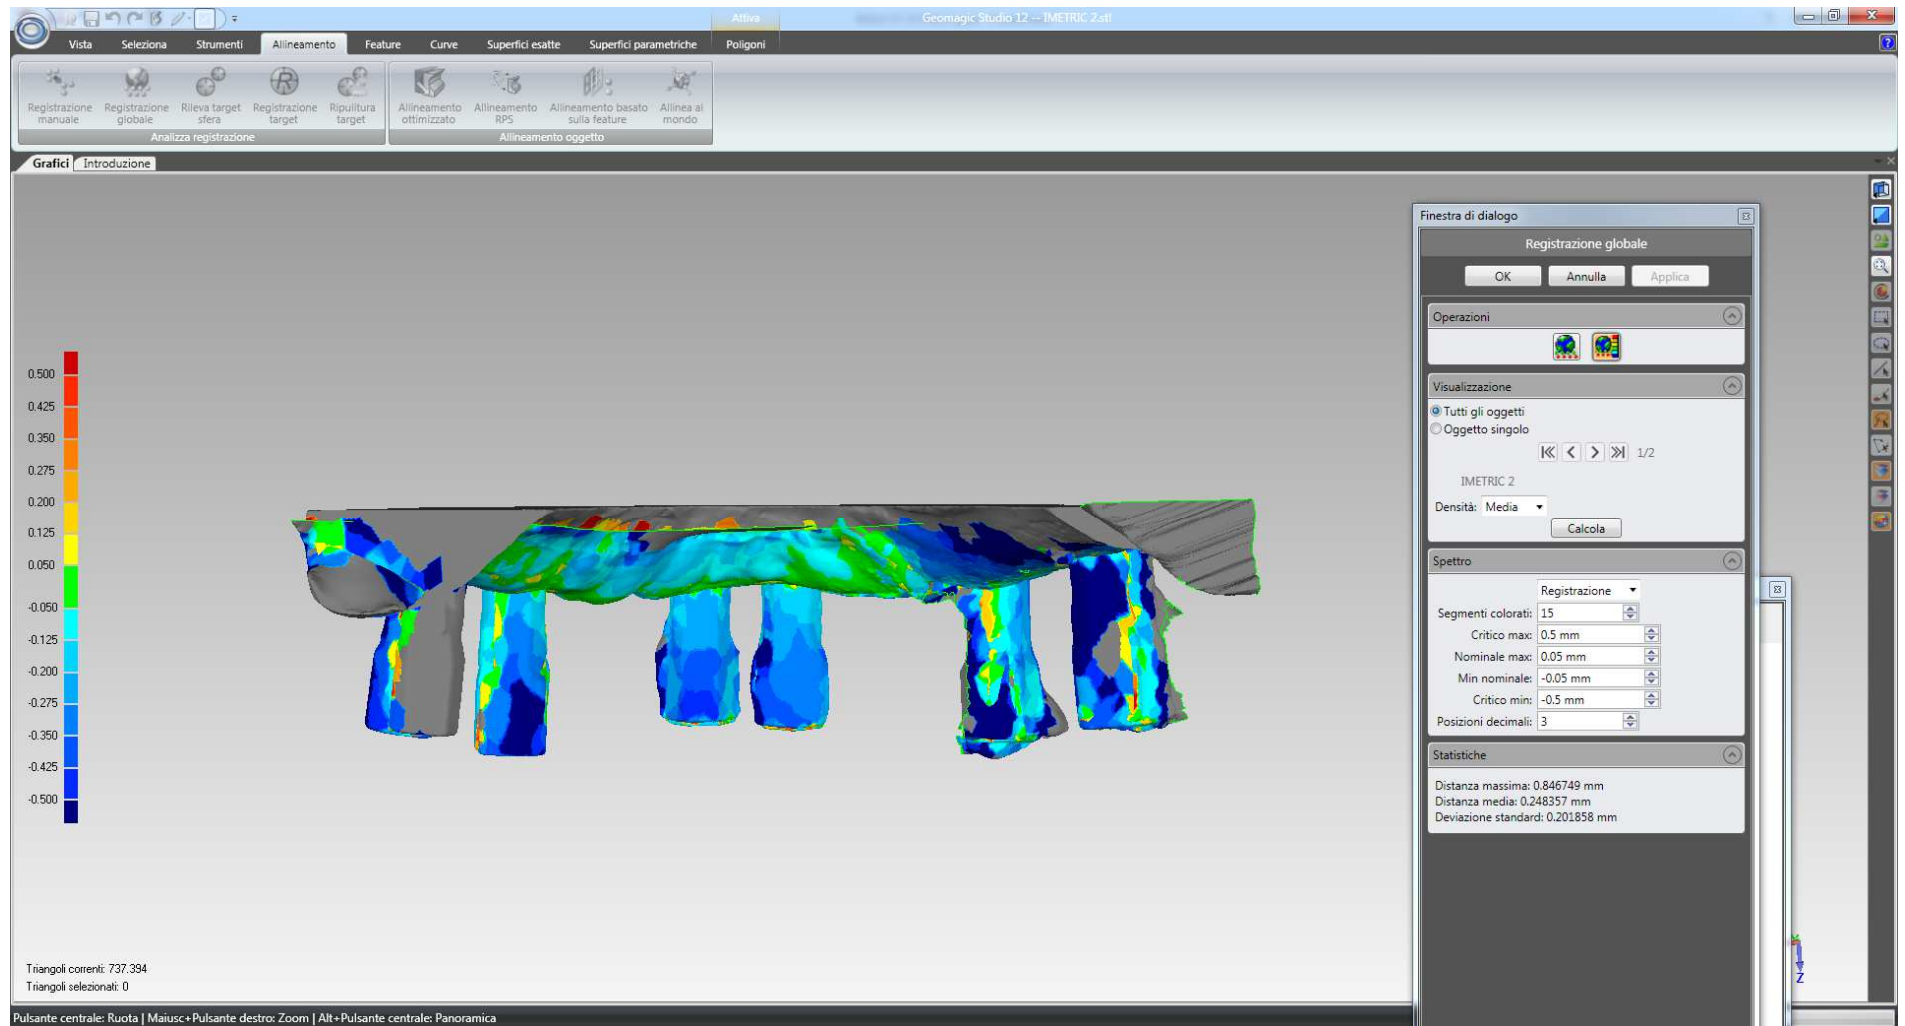

# Plan 1 vs REF (IMETRIC)

The screenshot displays the Geomagic Studio 12 interface for a registration task. The main window shows a 3D model of a mechanical part with a color-coded registration map. The color scale on the left ranges from -0.500 mm (dark blue) to 0.500 mm (dark red). The software interface includes a menu bar with options like Vista, Selezione, Strumenti, Allineamento, Feature, Curve, Superfici esatte, Superfici parametriche, and Poligoni. A toolbar below the menu bar contains various registration tools such as Registrazione manuale, Registrazione globale, Rileva target sfera, Registrazione target, Ripulitura target, Allineamento ottimizzato, Allineamento RPS, Allineamento basato sulla feature, and Allinea al mondo. A dialog box titled "Finestra di dialogo" is open on the right, showing settings for "Registrazione globale". The dialog box includes buttons for "OK", "Annulla", and "Applica". It also has sections for "Operazioni", "Visualizzazione", "Spettro", and "Statistiche". The "Spettro" section shows settings for "Registrazione" with values for "Segmenti colorati" (15), "Critico max" (0.5 mm), "Nominale max" (0.05 mm), "Min nominale" (-0.05 mm), "Critico min" (-0.5 mm), and "Posizioni decimali" (3). The "Statistiche" section shows "Distanza massima: 0.846749 mm", "Distanza media: 0.248357 mm", and "Deviazione standard: 0.201858 mm".

Triangoli correnti: 737.394  
Triangoli selezionati: 0

Pulsante centrale: Ruota | Maiusc+Pulsante destro: Zoom | Alt+Pulsante centrale: Panoramica



# Plan 2 vs REF (IMETRIC)

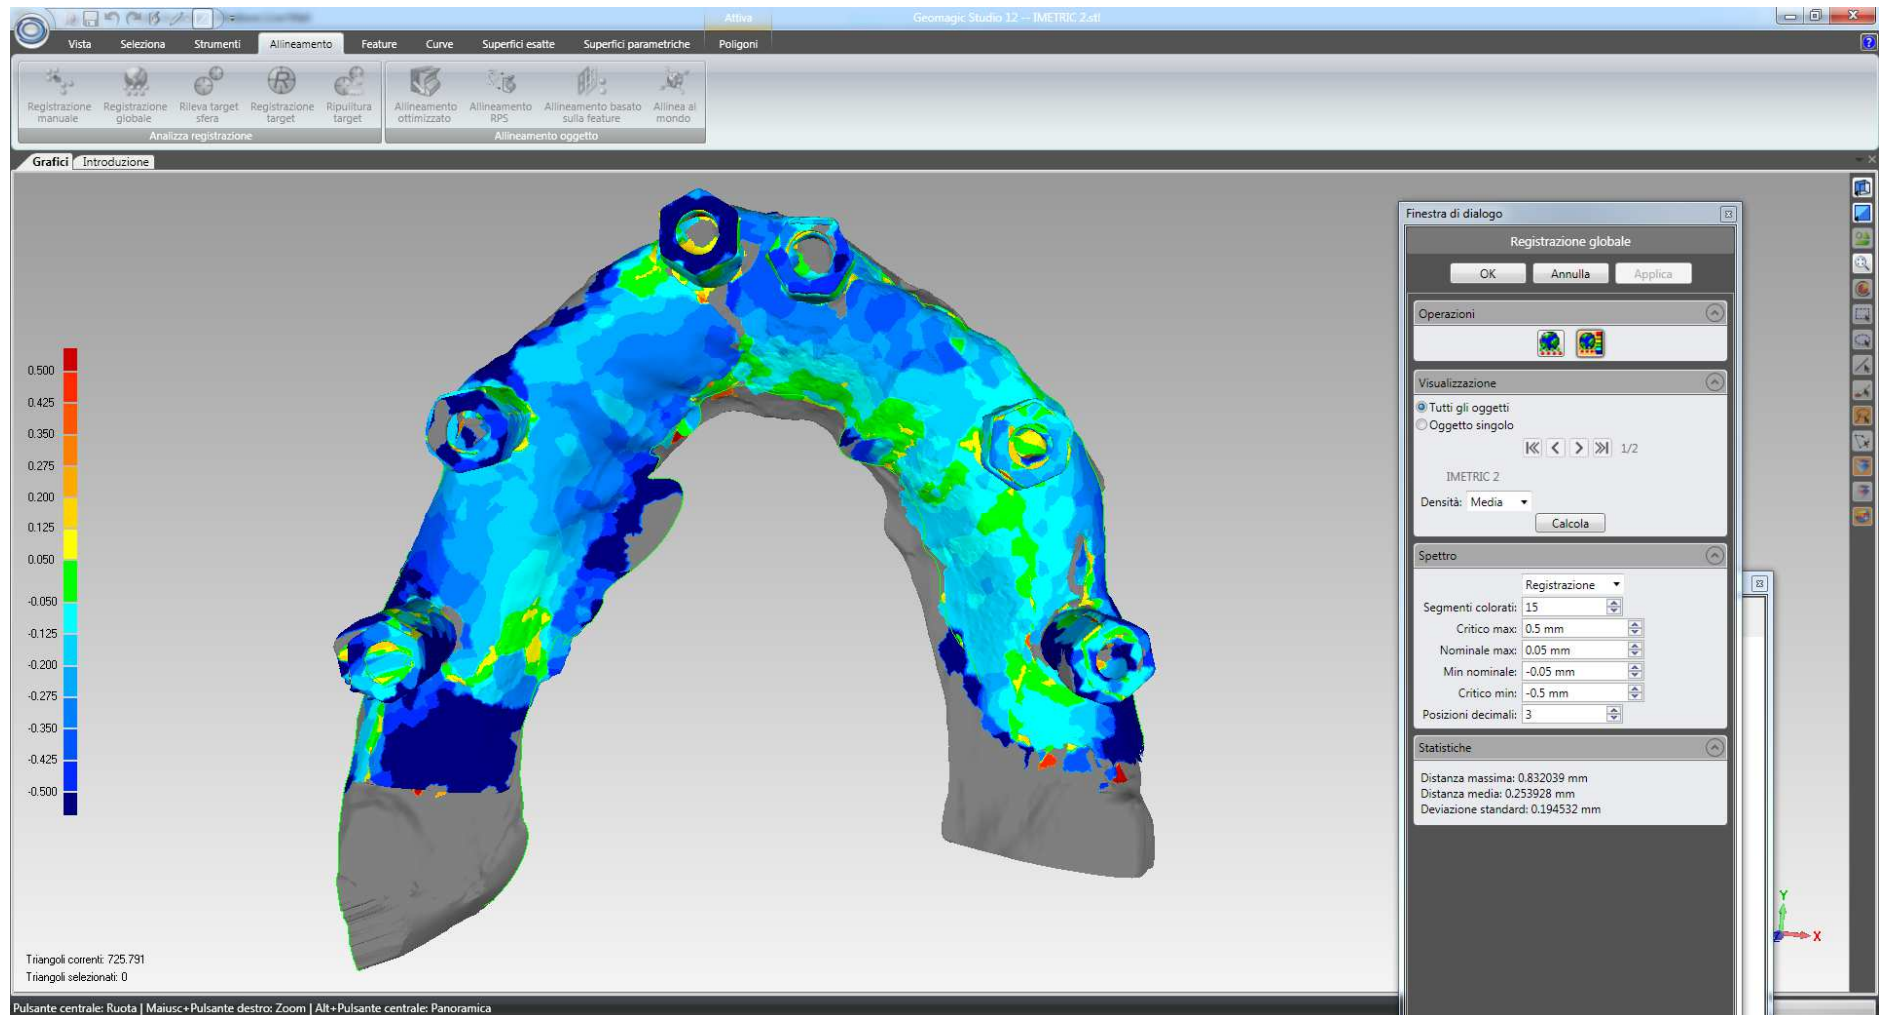

# Plan 2 vs REF (IMETRIC)

The screenshot displays the Geomagic Studio 12 interface. The main window shows a 3D model of a stone structure with a color-coded deviation map. The color scale on the left ranges from -0.500 (dark blue) to 0.500 (dark red). The model is primarily blue and cyan, indicating deviations within the nominal range, with some yellow and green areas. The 'Finestra di dialogo' (Dialog Window) is open on the right, showing the 'Registrazione globale' (Global Registration) settings. The 'Operazioni' section includes icons for registration and alignment. The 'Visualizzazione' section shows 'Tutti gli oggetti' (All objects) selected. The 'Spettro' (Spectrum) section shows the following settings:

| Parametro          | Valore   |
|--------------------|----------|
| Segmenti colorati  | 15       |
| Critico max        | 0.5 mm   |
| Nominale max       | 0.05 mm  |
| Min nominale       | -0.05 mm |
| Critico min        | -0.5 mm  |
| Posizioni decimali | 3        |

The 'Statistiche' (Statistics) section shows the following data:

| Statistica          | Valore      |
|---------------------|-------------|
| Distanza massima    | 0.832039 mm |
| Distanza media      | 0.253928 mm |
| Deviazione standard | 0.194532 mm |

At the bottom left, the status bar indicates: Triangoli correnti: 725.791, Triangoli selezionati: 0. At the bottom center, the keyboard shortcuts are: Pulsante centrale: Ruota | Maiusc+Pulsante destro: Zoom | Alt+Pulsante centrale: Panoramica.

# Plan 2 vs REF (IMETRIC)

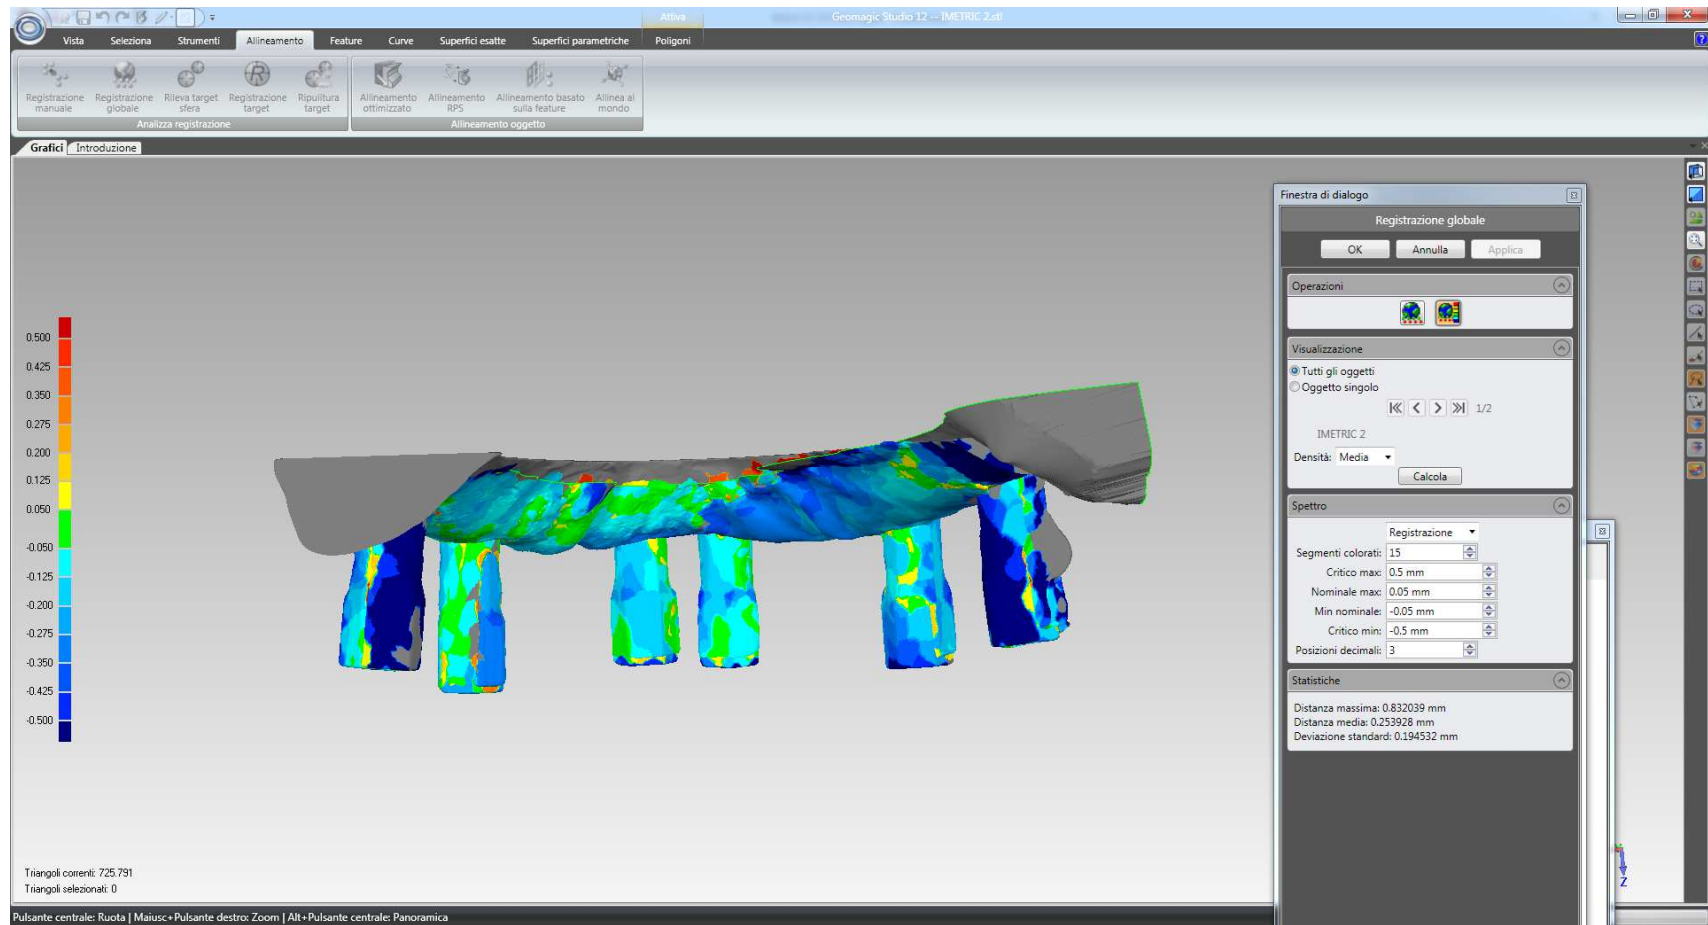

# Plan 2 vs REF (IMETRIC)

Geomagic Studio 12 — IMETRIC 2.zdt

Vista Selezione Strumenti Allineamento Feature Curve Superfici esatte Superfici parametriche Poligoni

Registrazione manuale Registrazione globale Rileva target sfera Registrazione target Ripulitura target Allineamento ottimizzato Allineamento RPS Allineamento basato sulla feature Allinea al mondo

Analizza registrazione Allineamento oggetto

Grafici Introduzione

0.500  
0.425  
0.350  
0.275  
0.200  
0.125  
0.050  
-0.050  
-0.125  
-0.200  
-0.275  
-0.350  
-0.425  
-0.500

Triangoli correnti: 725.791  
Triangoli selezionati: 0

Pulsante centrale: Ruota | Maiusc+Pulsante destro: Zoom | Alt+Pulsante centrale: Panoramica

Finestra di dialogo

Registrazione globale

OK Annulla Applica

Operazioni

Visualizzazione

Tutti gli oggetti  
 Oggetto singolo

IMETRIC 2

Densità: Media

Calcola

Spettro

Registrazione

Segmenti colorati: 15

Critico max: 0.5 mm

Nominale max: 0.05 mm

Min nominale: -0.05 mm

Critico min: -0.5 mm

Posizioni decimali: 3

Statistiche

Distanza massima: 0.832039 mm  
Distanza media: 0.253928 mm  
Deviazione standard: 0.194532 mm

# Plan 3 vs REF (IMETRIC)

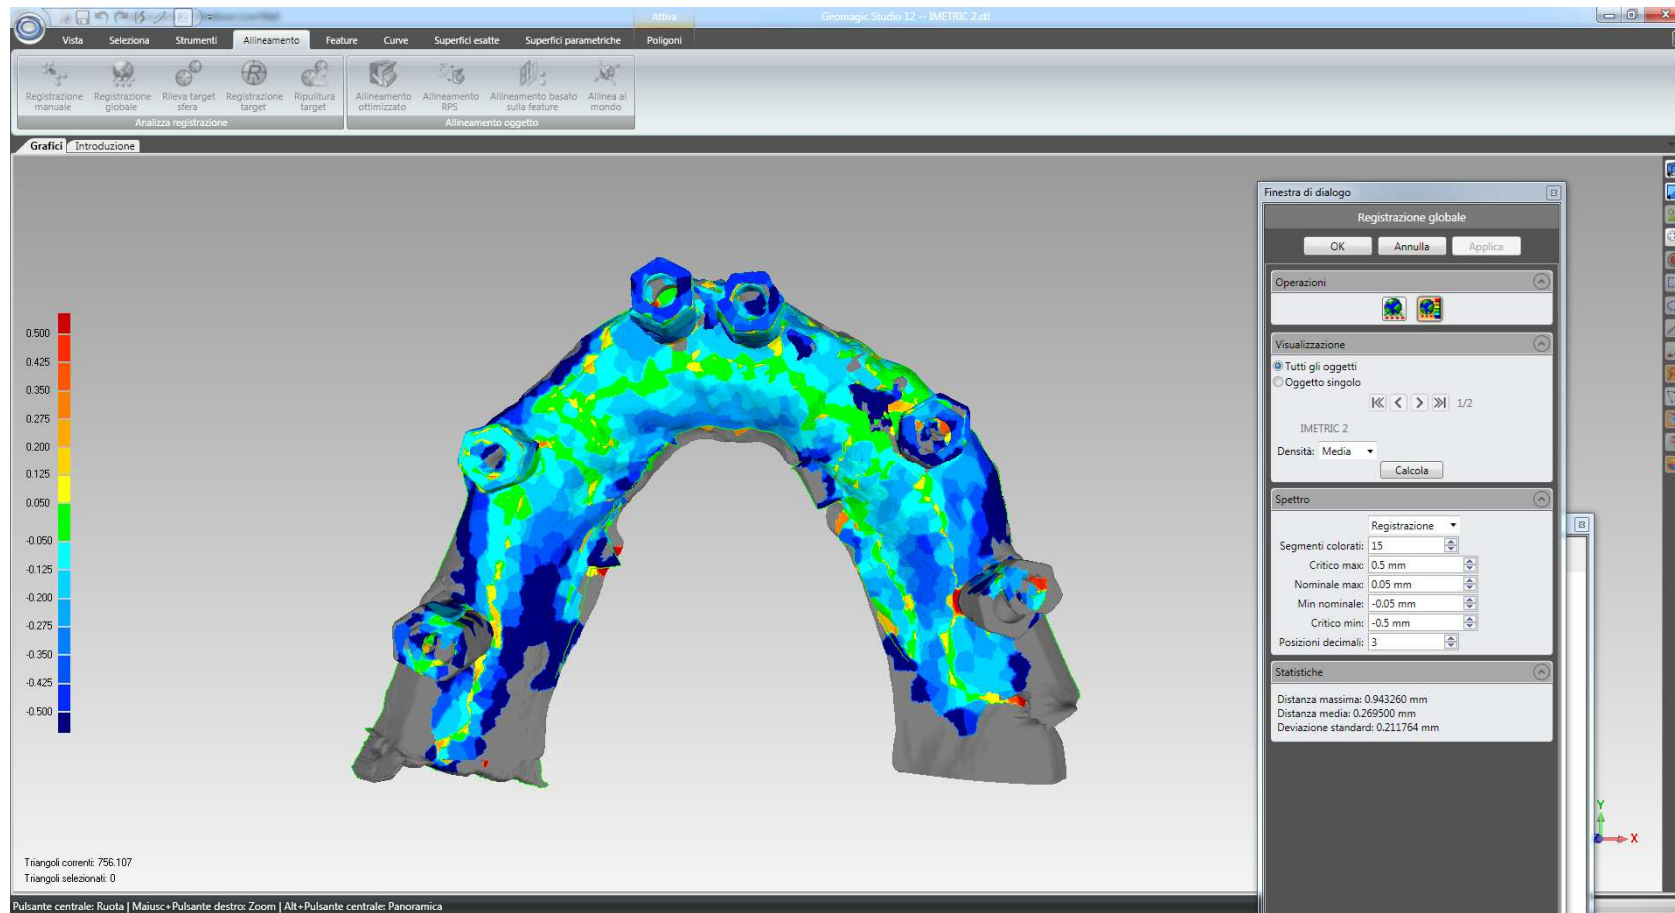

# Plan 3 vs REF (IMETRIC)

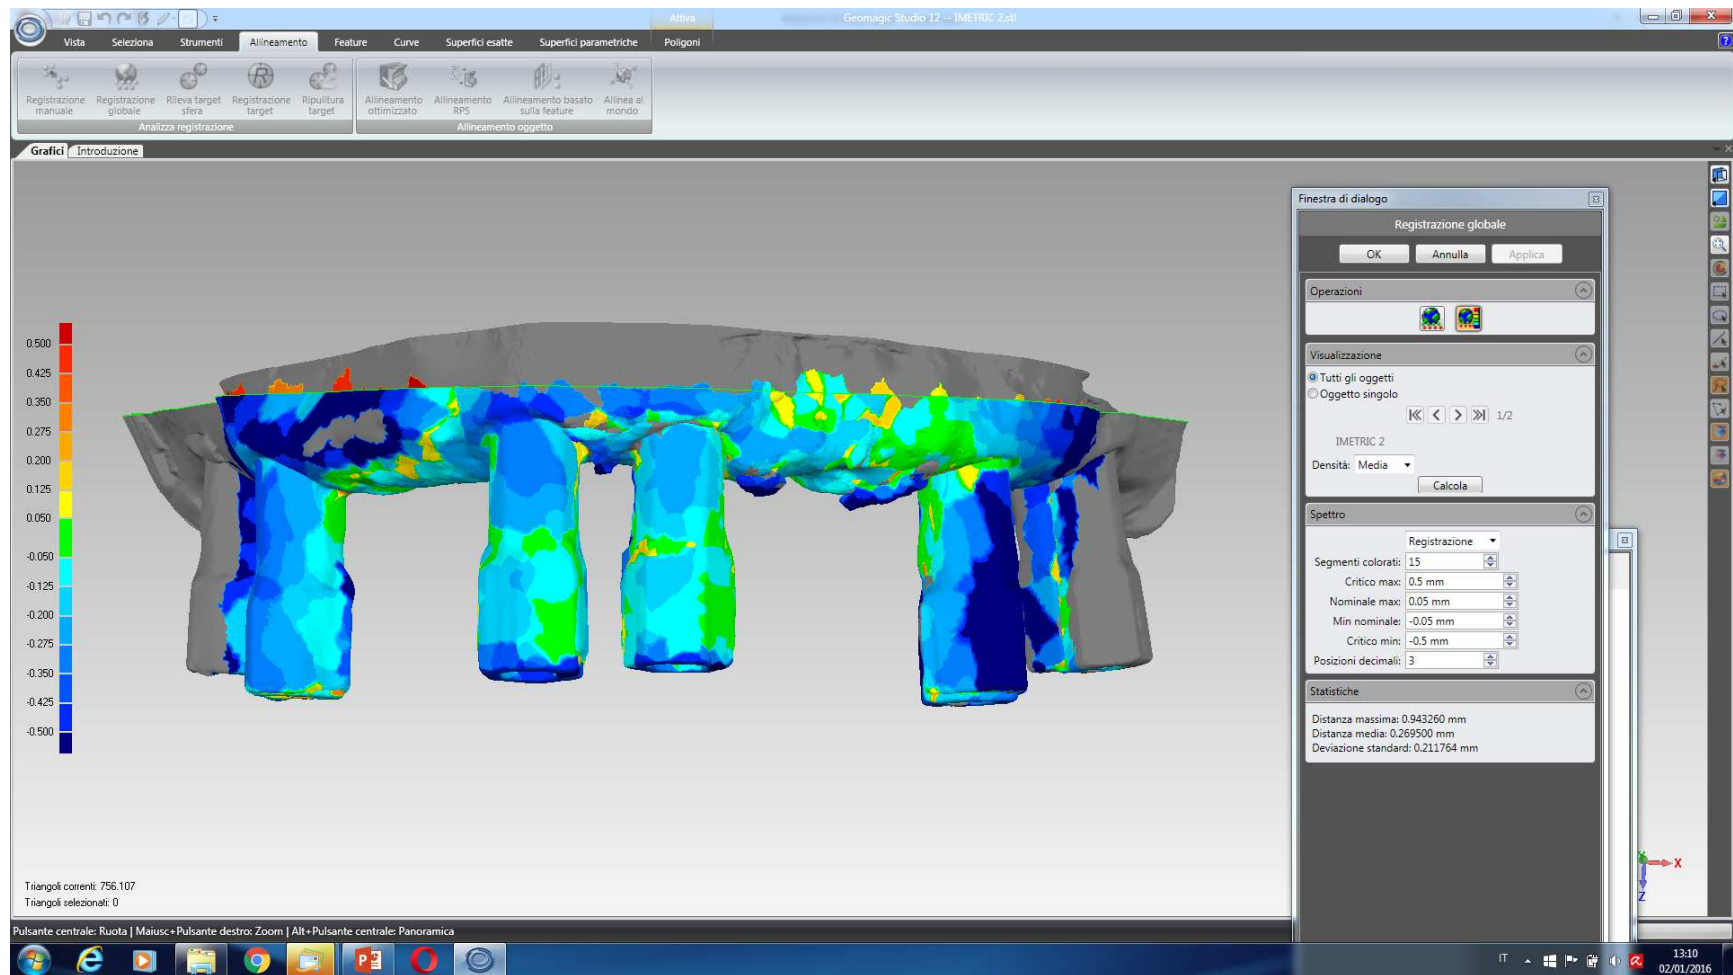

# Plan 3 vs REF (IMETRIC)

Geomagic Studio 12 -- IMETRIC 2.sif

Vista Selezione Strumenti Allineamento Feature Curve Superfici esatte Superfici parametriche Poligoni

Registrazione manuale Registrazione globale Rileva target sfera Registrazione target Ripulitura target Analizza registrazione

Allineamento ottimizzato Allineamento RPS Allineamento basato sulla feature Allinea al mondo Allineamento oggetto

Grafici Introduzione

0.500  
0.425  
0.350  
0.275  
0.200  
0.125  
0.050  
-0.050  
-0.125  
-0.200  
-0.275  
-0.350  
-0.425  
-0.500

Triangoli correnti: 756.107  
Triangoli selezionati: 0

Pulsante centrale: Ruota | Maiusc+Pulsante destro: Zoom | Alt+Pulsante centrale: Panoramica

Finestra di dialogo

Registrazione globale

OK Annulla Applica

Operazioni

Visualizzazione

Tutti gli oggetti  
 Oggetto singolo

IMETRIC 2

Densità: Media

Calcola

Spettro

Registrazione

Segmenti colorati: 15

Critico max: 0.5 mm

Nominale max: 0.05 mm

Min nominale: -0.05 mm

Critico min: -0.5 mm

Posizioni decimali: 3

Statistiche

Distanza massima: 0.943260 mm  
Distanza media: 0.269500 mm  
Deviazione standard: 0.211764 mm

# Plan 3 vs REF (IMETRIC)

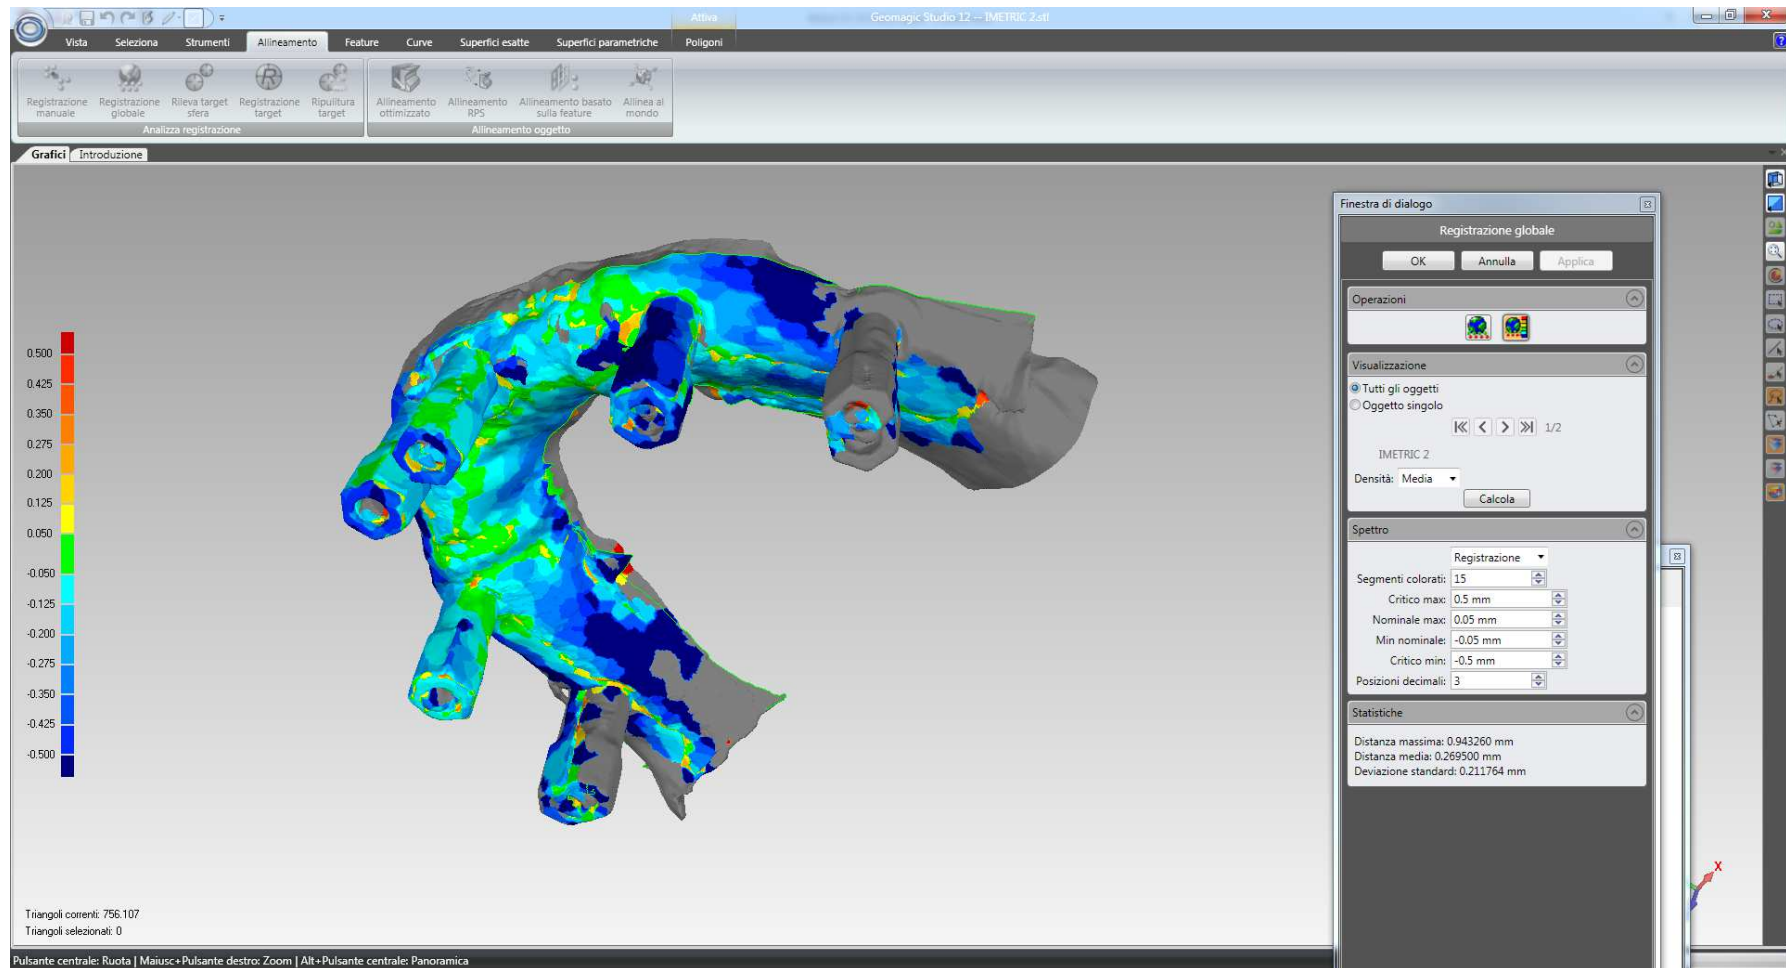



# Plan 4 vs REF (IMETRIC)

The screenshot displays the Geomagic Studio 12 interface. The main window shows a 3D model of a mechanical part, likely a bracket or arch, with a color-coded registration error map. The color scale on the left ranges from -0.500 (blue) to 0.500 (red). The model is positioned in a 3D coordinate system with X, Y, and Z axes visible at the bottom right.

The software interface includes a menu bar at the top with options like Vista, Selezione, Strumenti, Allineamento, Feature, Curve, Superfici esatte, Superfici parametriche, and Poligoni. Below the menu bar is a toolbar with various registration and alignment tools.

The main window displays the 3D model of the part, which is a curved structure with several bolt holes. The model is color-coded to show registration errors, with a color scale on the left ranging from -0.500 (blue) to 0.500 (red). The model is positioned in a 3D coordinate system with X, Y, and Z axes visible at the bottom right.

The bottom left corner of the main window shows the following statistics:

- Triangoli correnti: 763.060
- Triangoli selezionati: 0

The bottom of the window displays the following keyboard shortcuts:

Pulsante centrale: Ruota | Maiusc+Pulsante destro: Zoom | Alt+Pulsante centrale: Panoramica

The right side of the window features a "Finestra di dialogo" (Dialog Box) titled "Registrazione globale" (Global Registration). It contains the following settings:

- Operazioni: [Icons]
- Visualizzazione:  Tutti gli oggetti,  Oggetto singolo
- IMETRIC 2
- Densità: Media
- Calcola
- Spettro:  Segmenti colorati: 15
- Critico max: 0.5 mm
- Nominale max: 0.05 mm
- Min nominale: -0.05 mm
- Critico min: -0.5 mm
- Posizioni decimali: 3
- Statistiche: Distanza massima: 0.900513 mm, Distanza media: 0.263722 mm, Deviazione standard: 0.207148 mm

# Plan 4 vs REF (IMETRIC)

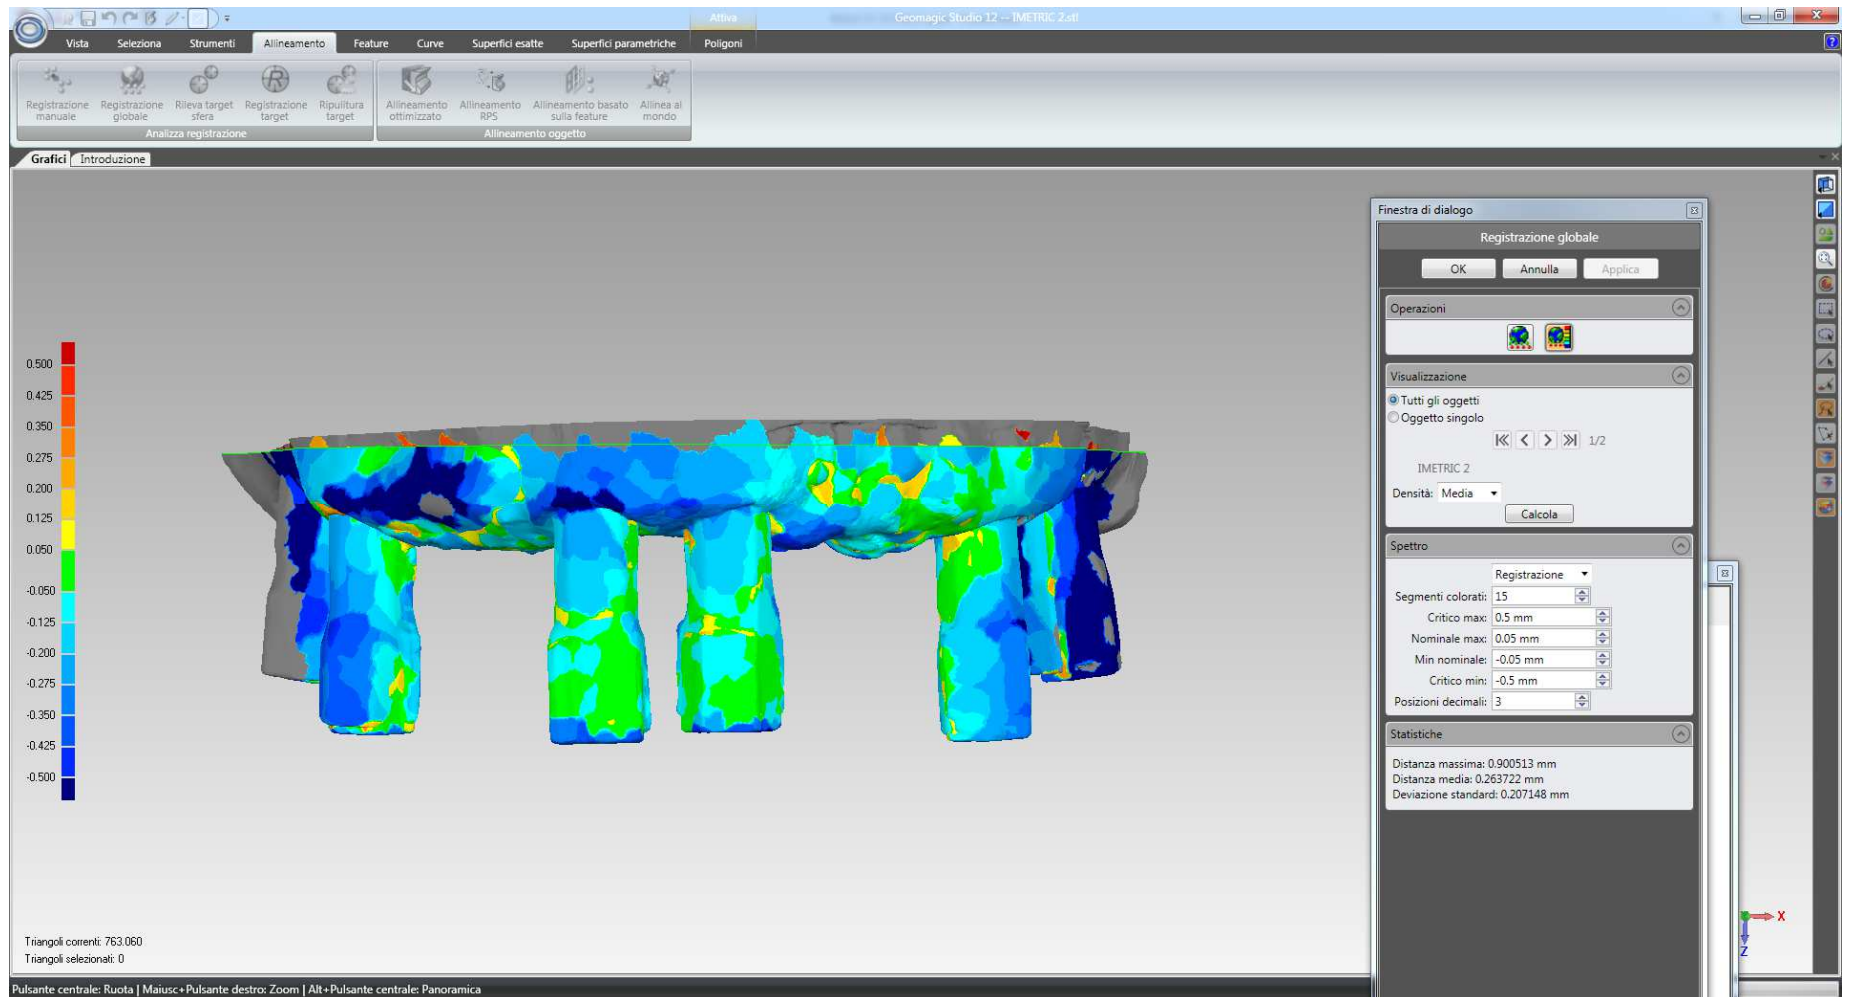

# Plan 4 vs REF (IMETRIC)

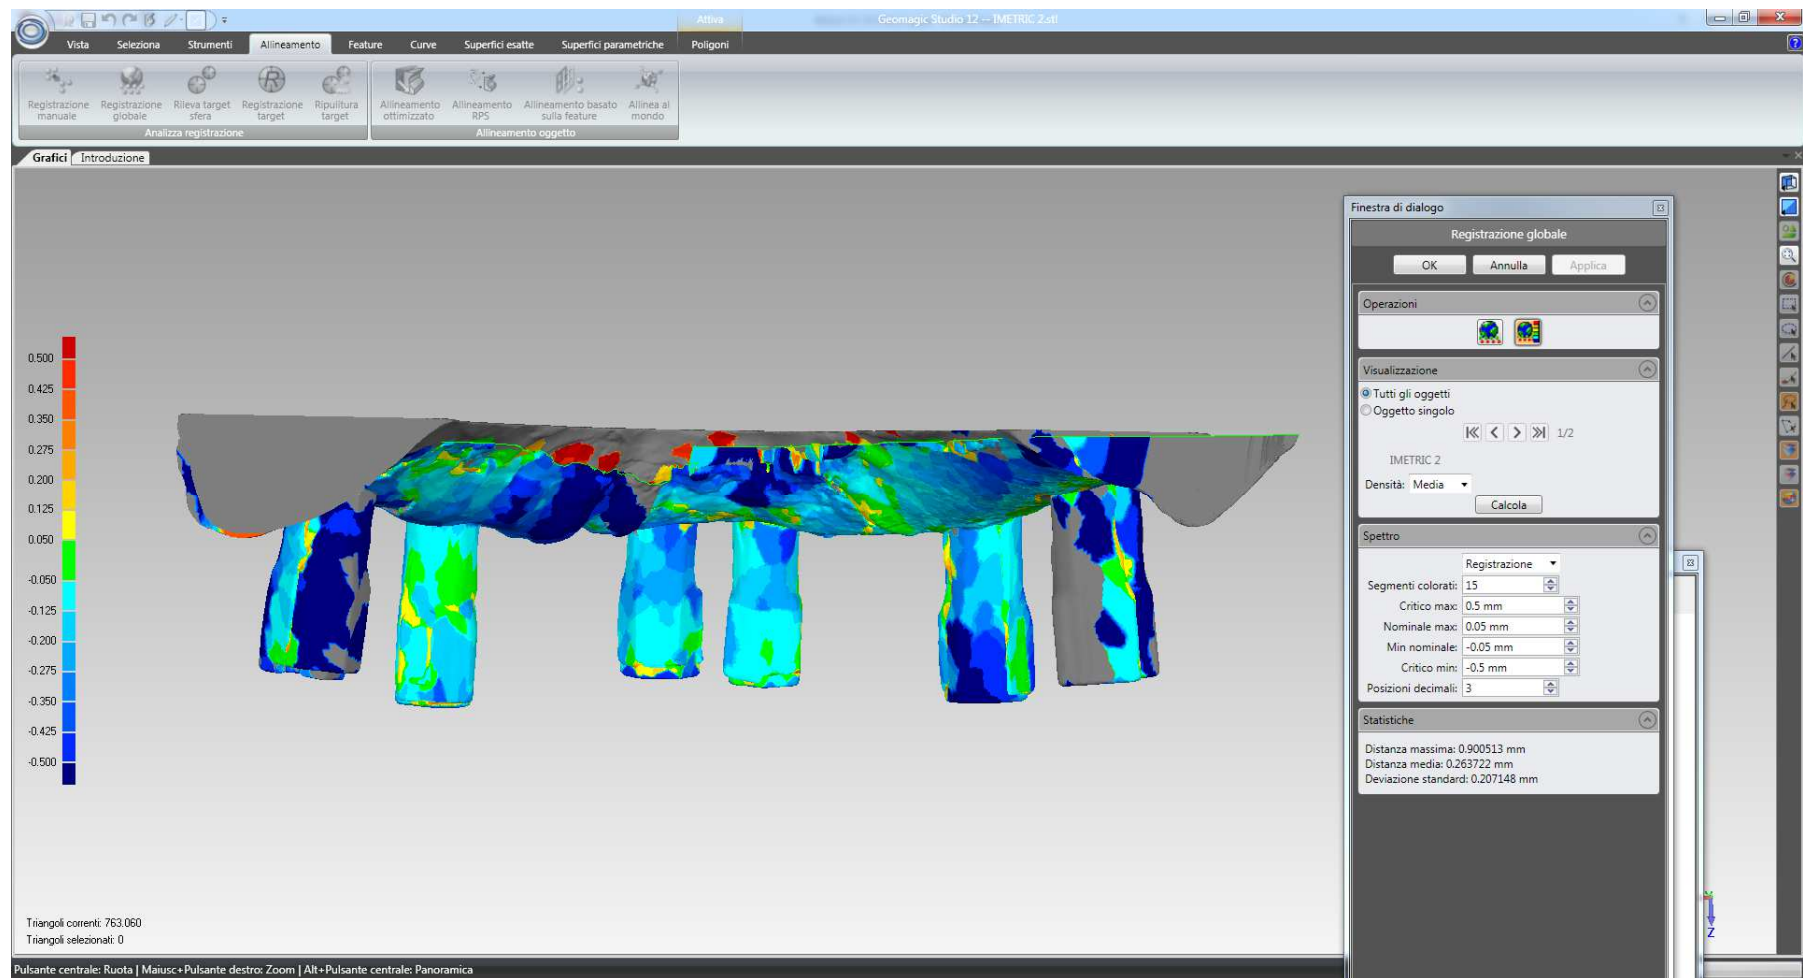

# Plan 4 vs REF (IMETRIC)

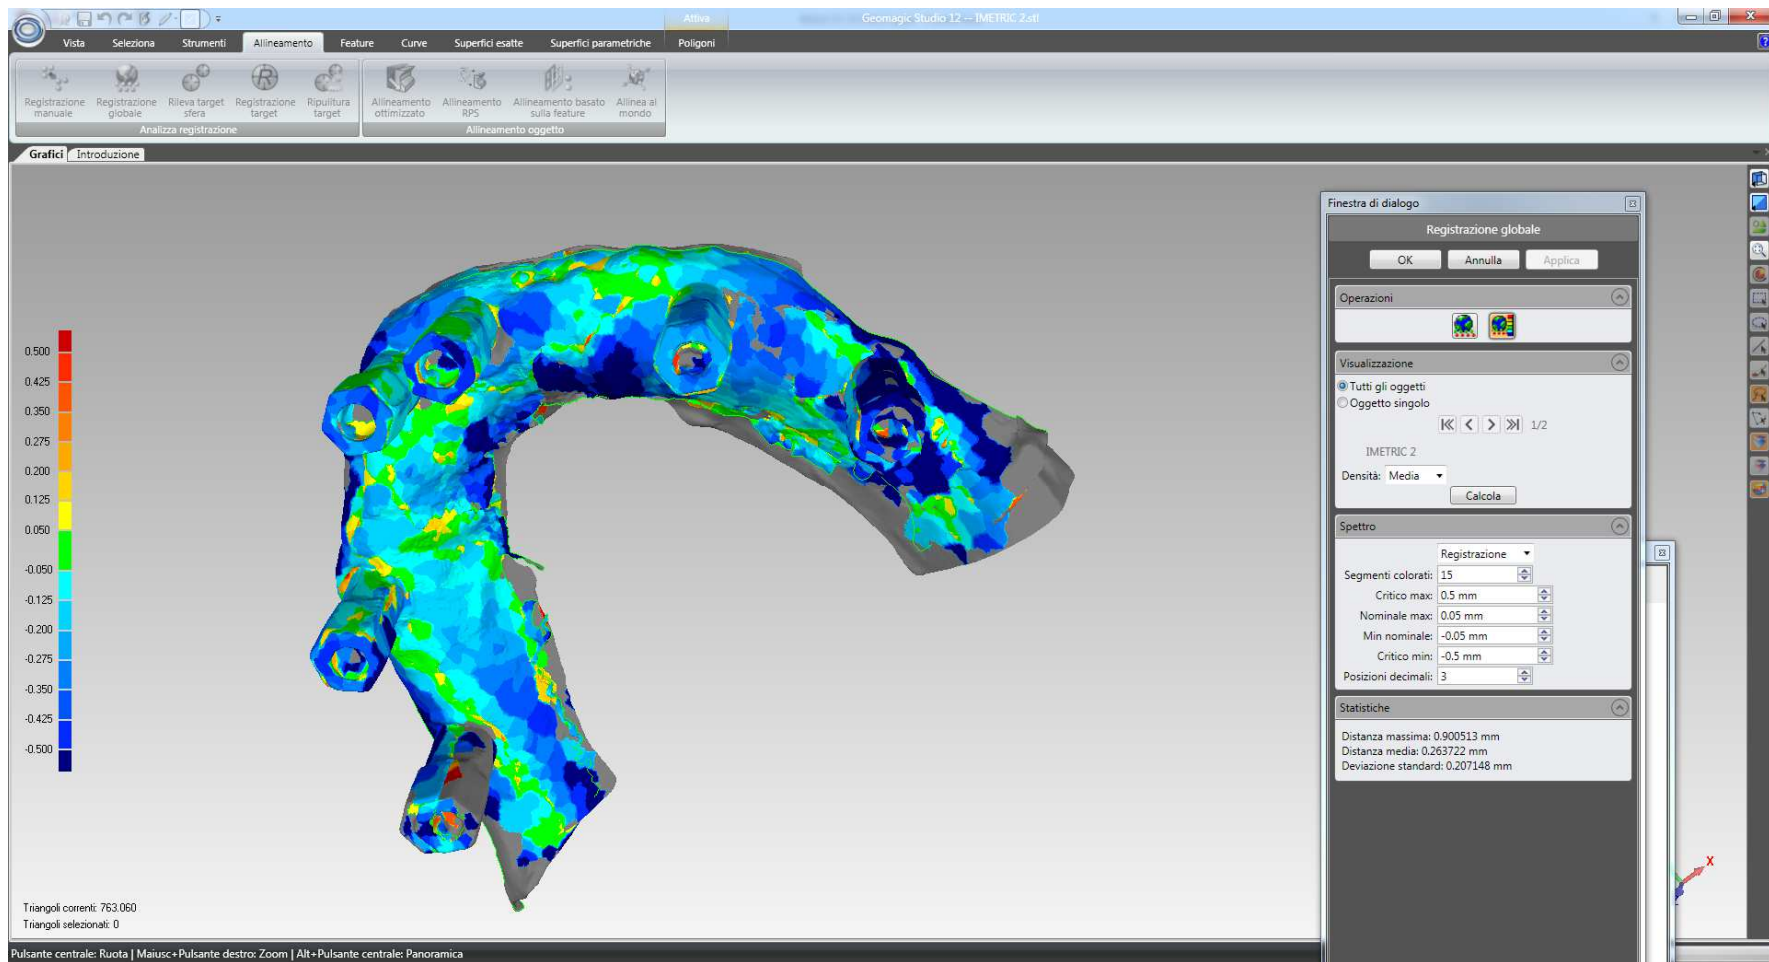

# Plan 5 vs REF (IMETRIC)

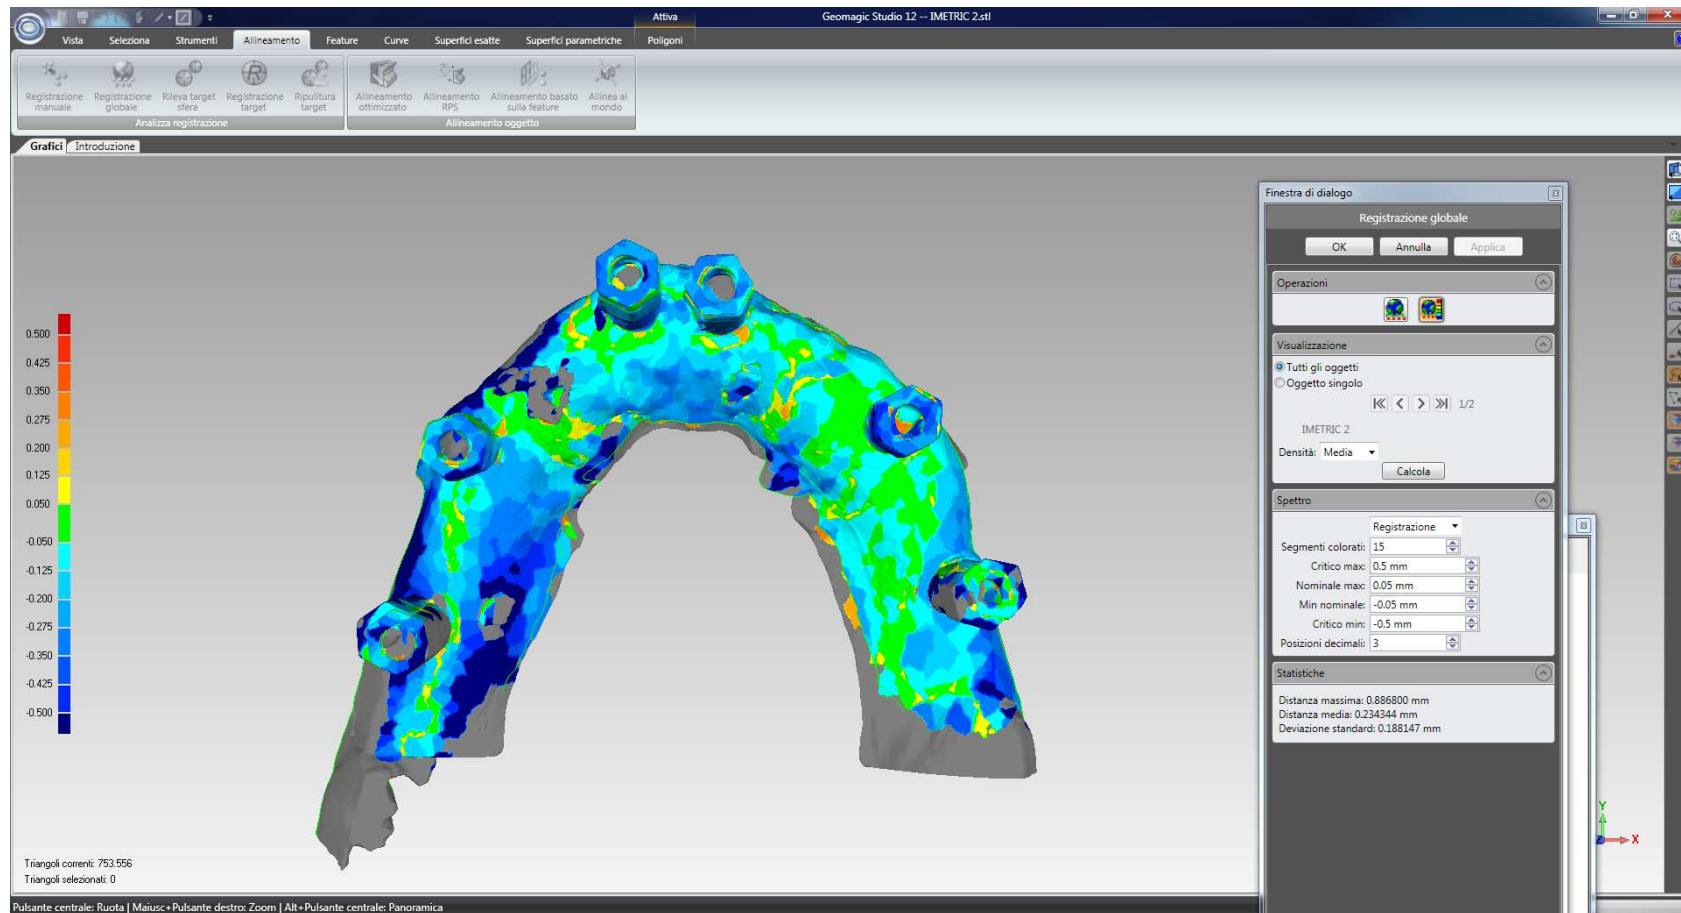

# Plan 5 vs REF (IMETRIC)

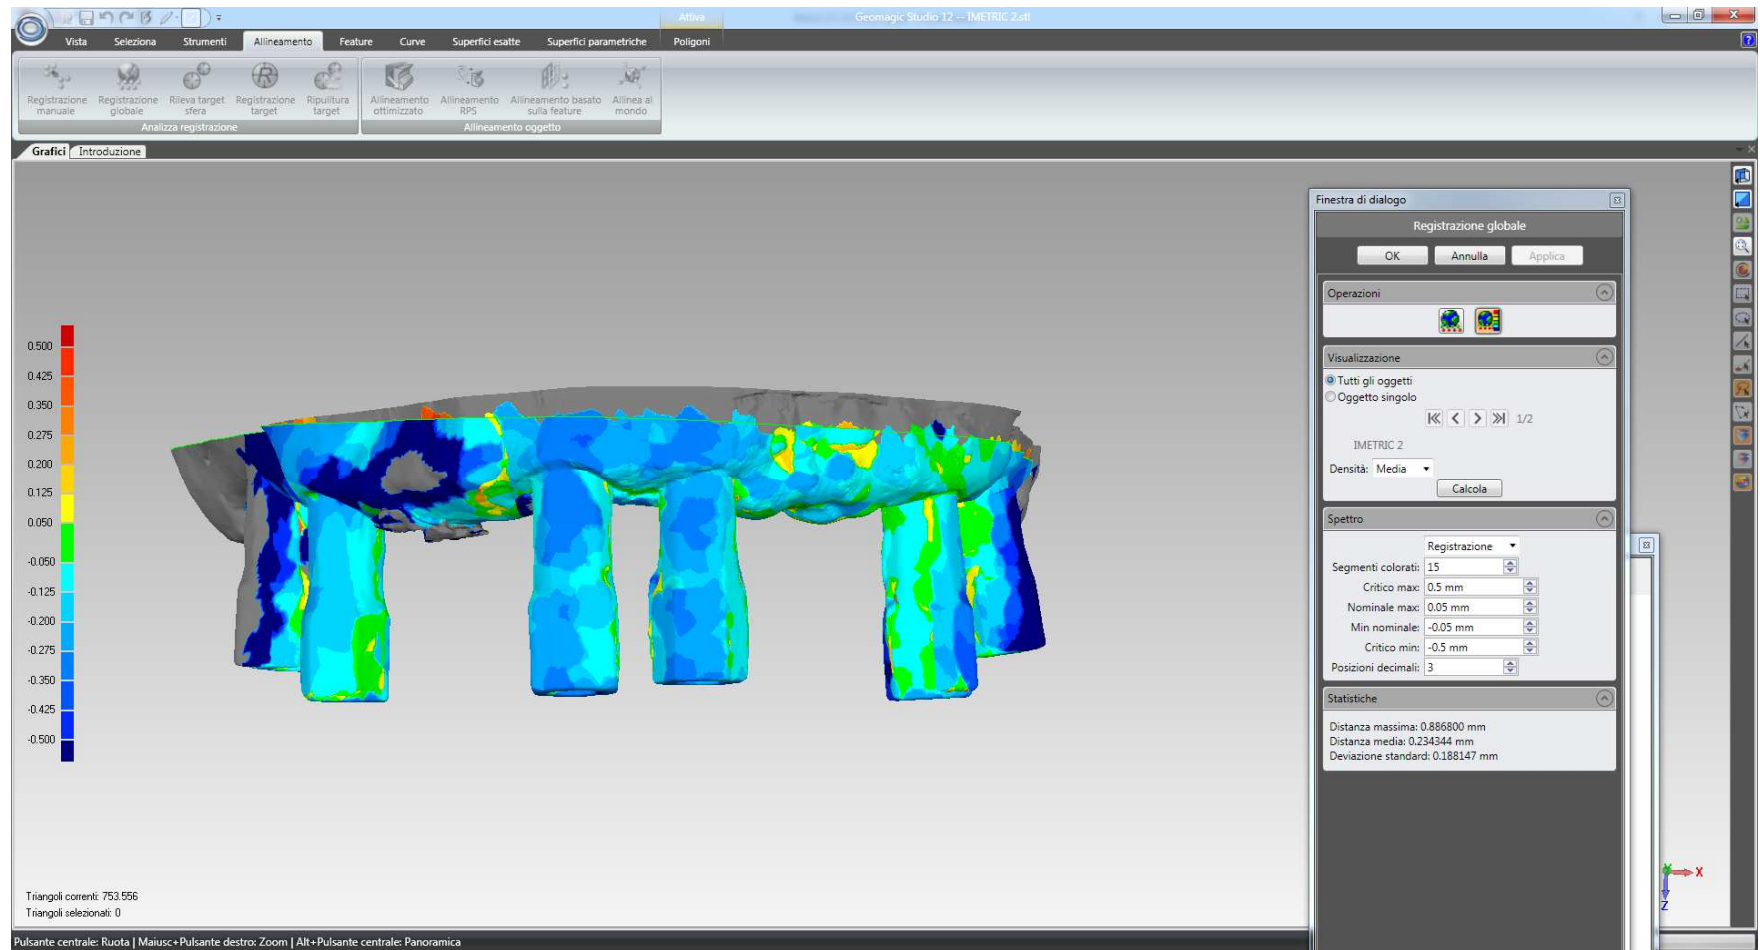

# Plan 5 vs REF (IMETRIC)

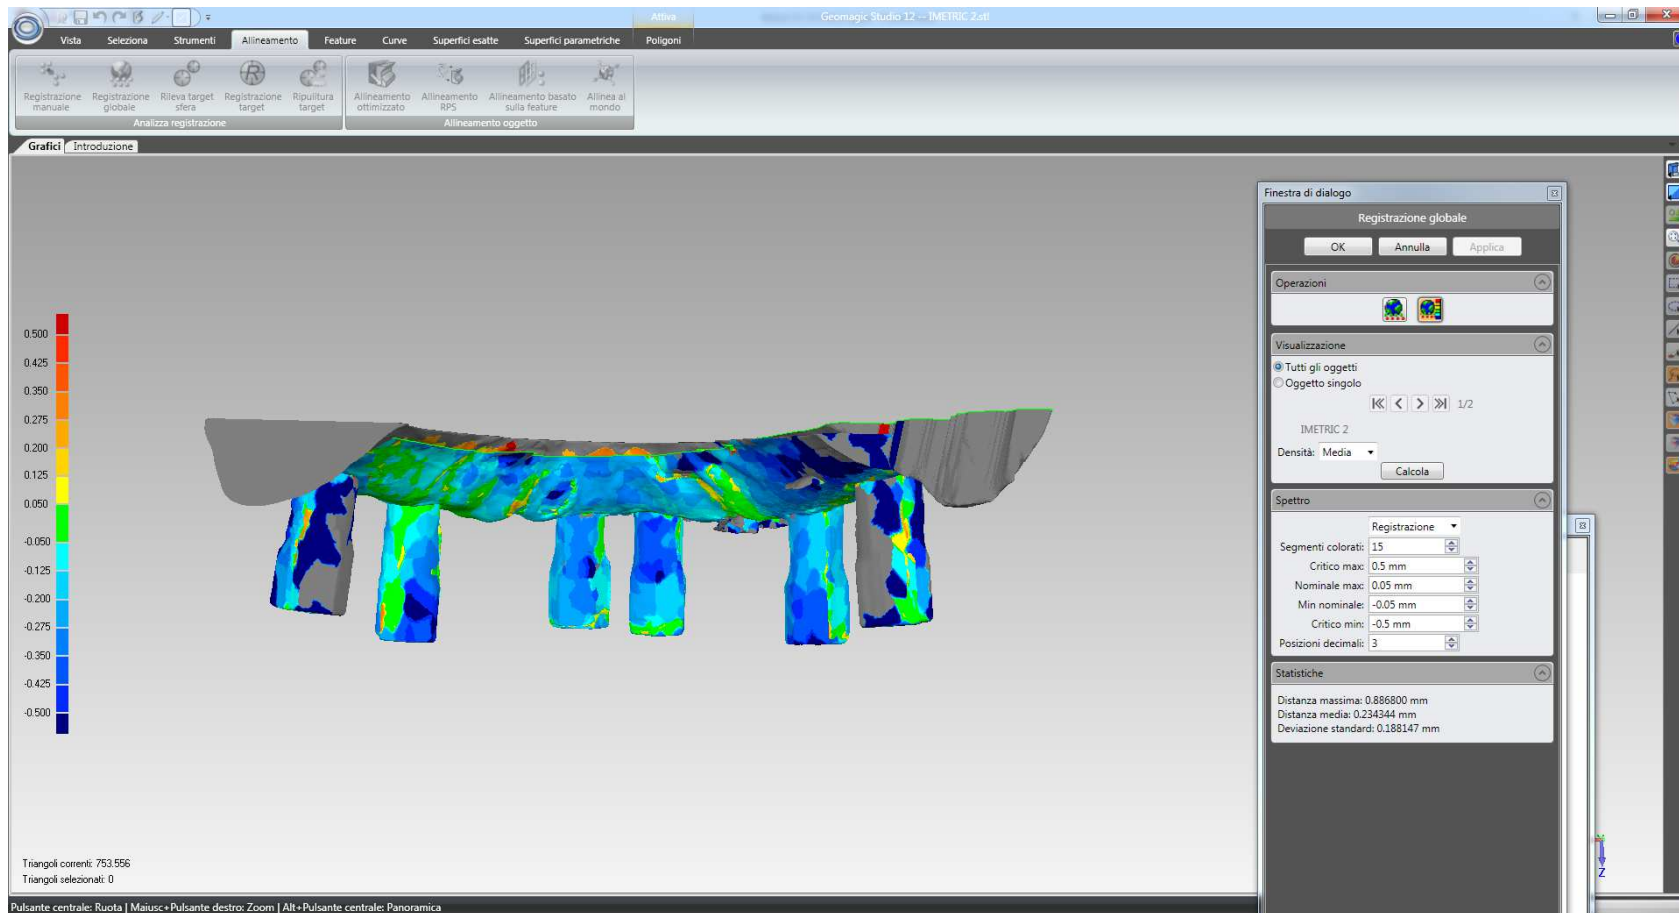

# Plan 5 vs REF (IMETRIC)

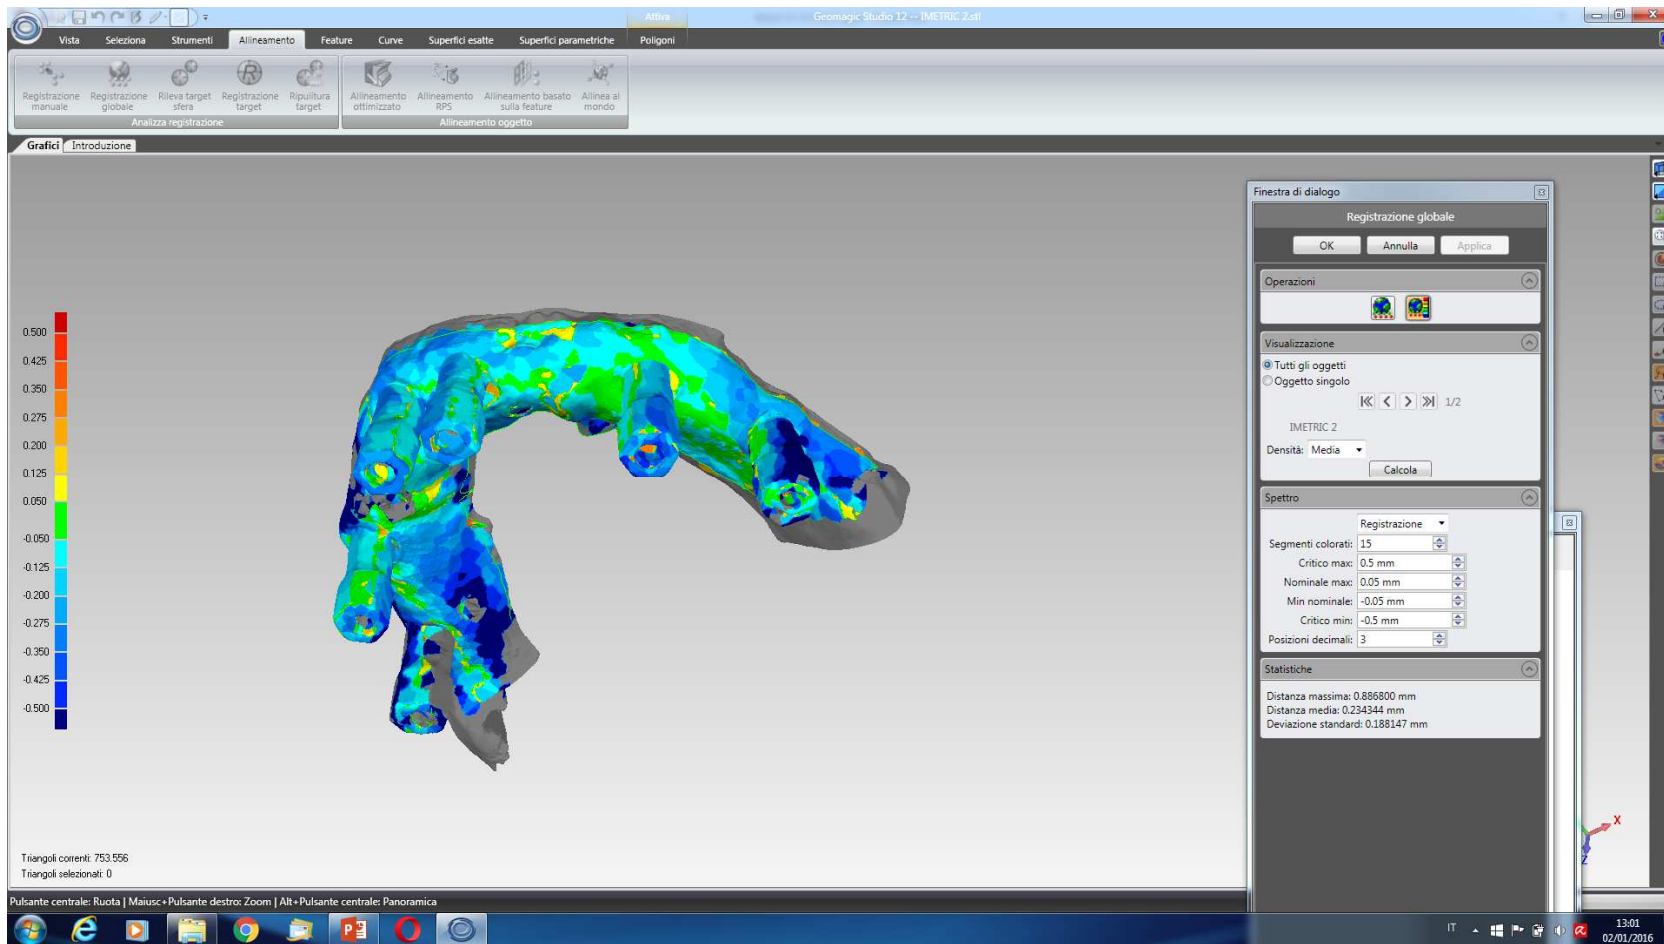



General trueness of the Planscan in the totally edentulous patient

|        | Mean distance | SD    | Maximum distance |
|--------|---------------|-------|------------------|
| Plan 1 | 0.248         | 0.201 | 0.846            |
| Plan 2 | 0.253         | 0.194 | 0.832            |
| Plan 3 | 0.269         | 0.211 | 0.943            |
| Plan 4 | 0.263         | 0.207 | 0.900            |
| Plan 5 | 0.234         | 0.188 | 0.886            |

**Overall Plane general accuracy: 0.253 (0.013)**

GENERAL PRECISION EVALUATIONS FOR TRIOS, ZFX INTRASCAN, CARESTREAM, PLANSCAN (SCANS WERE RANDOM BUT HERE WE ORDERED THEM) IN THE TOTALLY EDENTULOUS MODEL

GENERAL SETTINGS FOR FINAL REGISTRATION (TRUENESS):

0.5 mm, 0.05 mm, -0.05 mm, -0.5 mm (see scale)

## Trios 3 as reference (best accuracy) vs trios 1

Geomagic Studio 12 -- trios 3.stl

Attiva

Vista Selezione Strumenti Allineamento Feature Curve Superfici esatte Superfici parametriche Poligoni

Registrazione manuale Registrazione globale Rileva target sfera Registrazione target Ripulitura target

Analizza registrazione

Allineamento ottimizzato Allineamento RPS Allineamento basato sulla feature Allinea al mondo

Allineamento oggetto

Grafici Introduzione

0.500  
0.425  
0.350  
0.275  
0.200  
0.125  
0.050  
-0.050  
-0.125  
-0.200  
-0.275  
-0.350  
-0.425  
-0.500

Triangoli correnti: 370.129  
Triangoli selezionati: 0

Pulsante centrale: Ruota | Maiusc+Pulsante destro: Zoom | Alt+Pulsante centrale: Panoramica

Finestra di dialogo

Registrazione globale

OK Annulla Applica

Operazioni

Visualizzazione

Tutti gli oggetti  
 Oggetto singolo

trios 3

Densità: Media

Calcola

Spettro

Registrazione

Segmenti colorati: 15

Critico max: 0.5 mm

Nominale max: 0.05 mm

Min nominale: -0.05 mm

Critico min: -0.5 mm

Posizioni decimali: 3

Statistiche

Distanza massima: 0.849634 mm  
Distanza media: 0.121664 mm  
Deviazione standard: 0.136688 mm

08:58  
27/12/2015

# Trios 3 as reference (best accuracy) vs trios 1

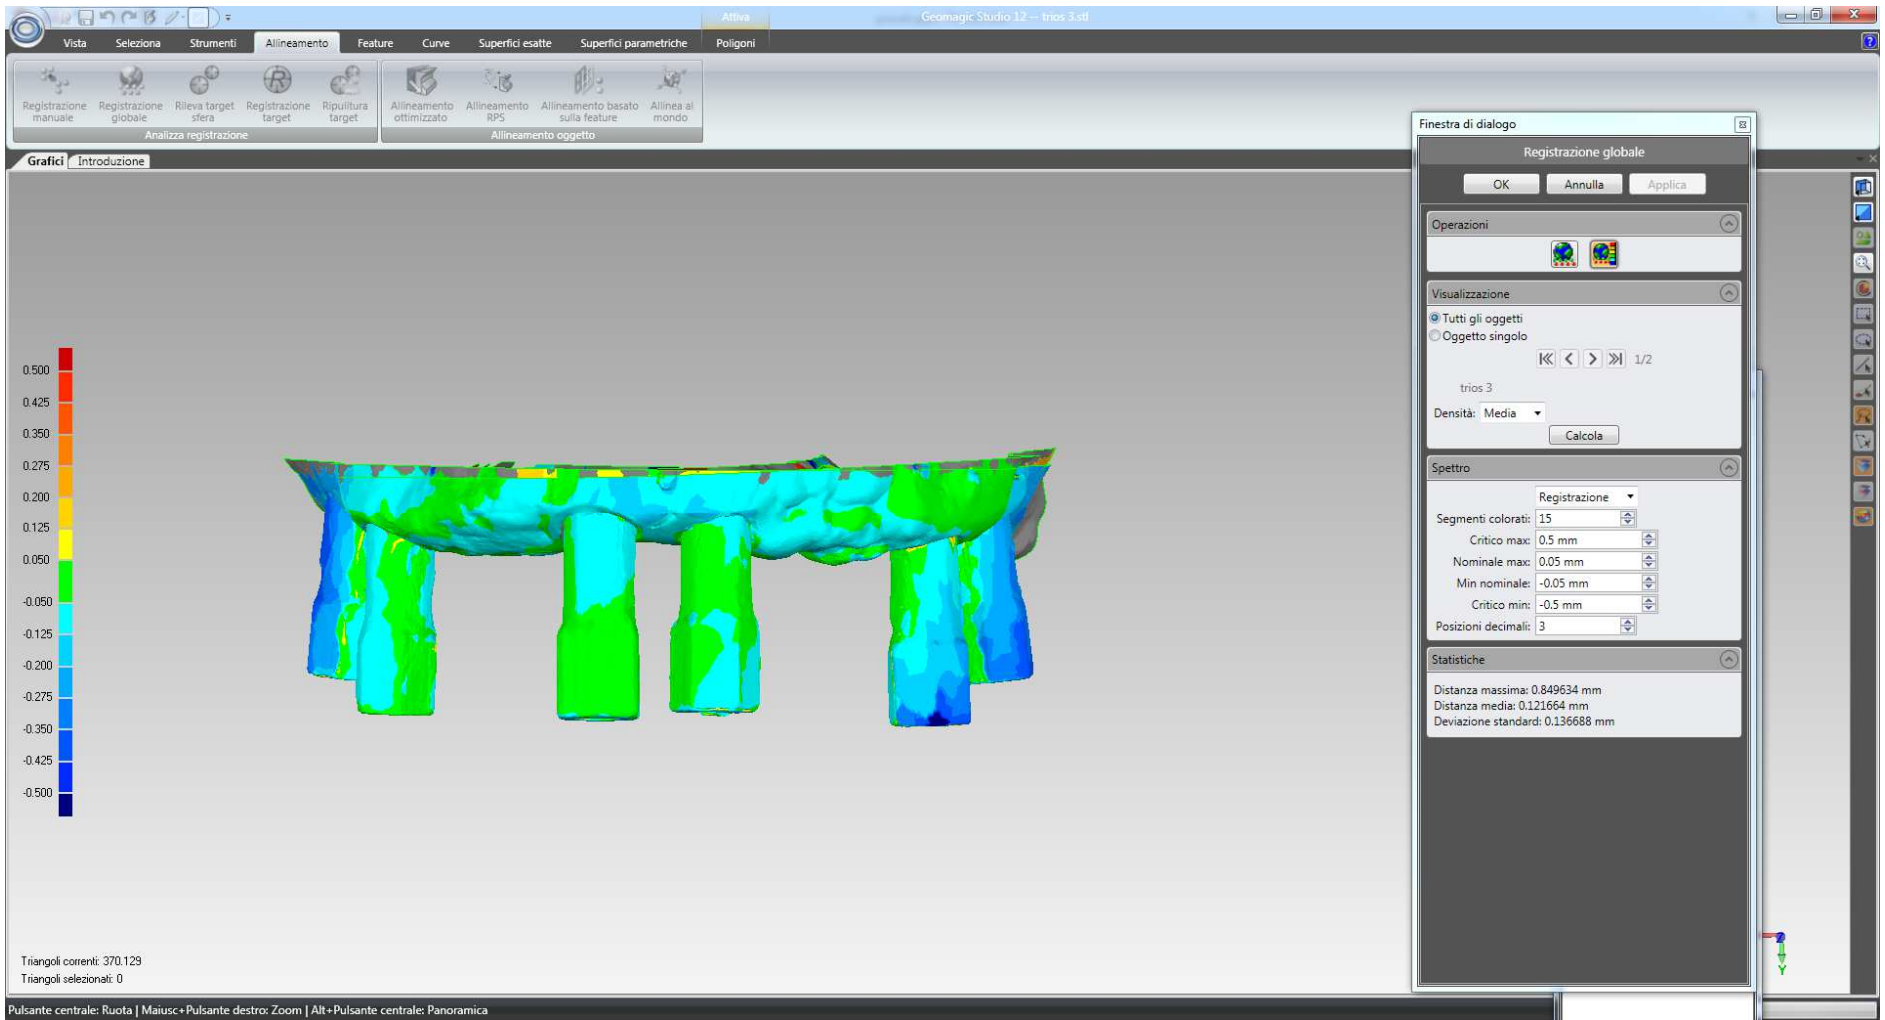

## Trios 3 as reference (best accuracy) vs trios 1

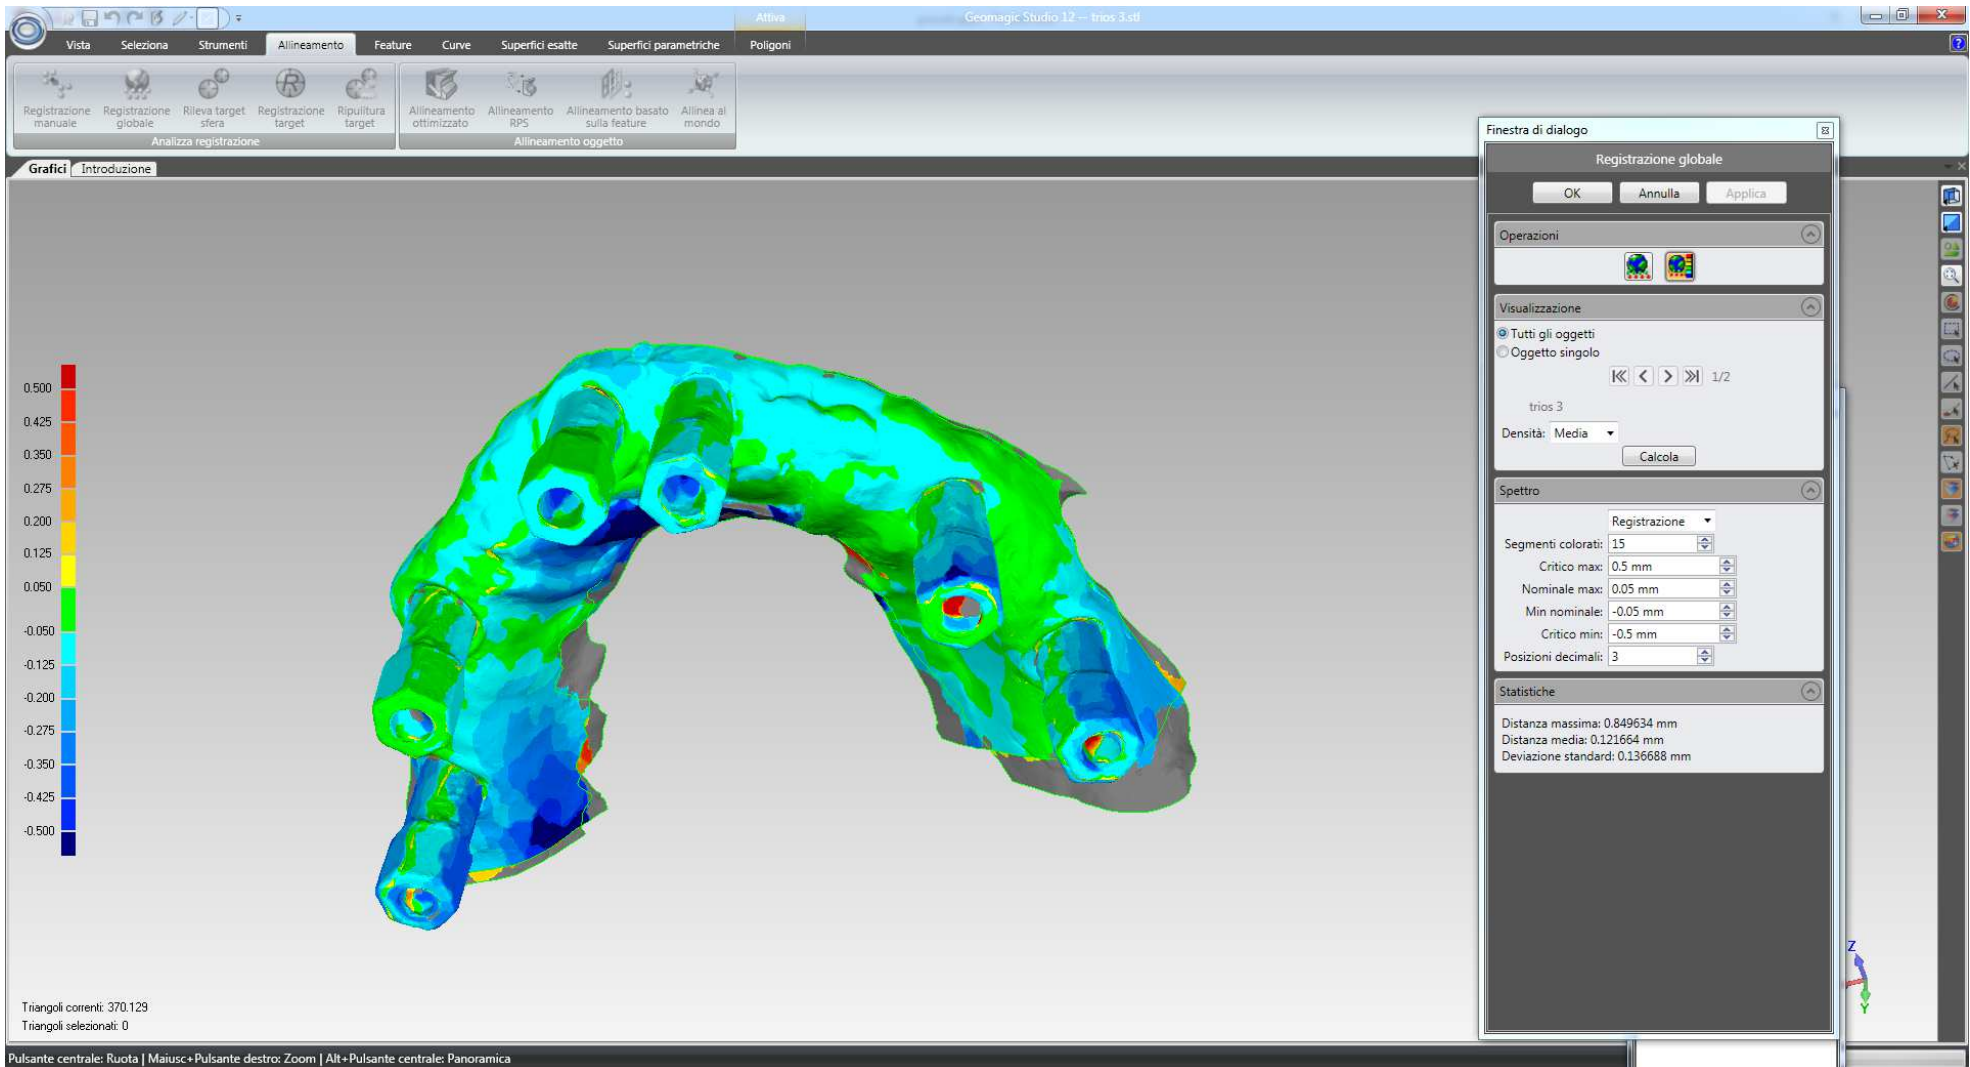

## Trios 3 as reference (best accuracy) vs trios 1

The screenshot displays the Geomagic Studio 12 interface. The main window shows a 3D model of a mechanical part with a color-coded surface deviation map. The color scale on the left ranges from -0.500 to 0.500. The model is supported by six vertical pillars. A 'Finestra di dialogo' (Dialog Window) is open on the right, displaying registration statistics for 'trios 3'.

**Finestra di dialogo: Registrazione globale**

Operazioni: [Globe icon] [Target icon]

Visualizzazione:  
 Tutti gli oggetti  
 Oggetto singolo  
trios 3  
Densità: Media [v]  
[Calcola]

Spettro:  
Registrazione [v]  
Segmenti colorati: 15 [v]  
Critico max: 0.5 mm [v]  
Nominale max: 0.05 mm [v]  
Min nominale: -0.05 mm [v]  
Critico min: -0.5 mm [v]  
Posizioni decimali: 3 [v]

Statistiche:  
Distanza massima: 0.849634 mm  
Distanza media: 0.121664 mm  
Deviazione standard: 0.136688 mm

Triangoli correnti: 370.129  
Triangoli selezionati: 0

Pulsante centrale: Ruota | Maiusc+Pulsante destro: Zoom | Alt+Pulsante centrale: Panoramica

## Trios 3 as reference (best accuracy) vs trios 2

The screenshot displays the Geomagic Studio 12 interface. The main window shows a 3D model of a curved part with a color-coded registration error map. The error map ranges from -0.500 mm (blue) to 0.500 mm (red). The dialog box on the right shows the following registration statistics:

| Registrazione globale |             |
|-----------------------|-------------|
| Operazioni            |             |
| Visualizzazione       |             |
| Densità: Media        |             |
| Spettro               |             |
| Segmenti colorati:    | 15          |
| Critico max:          | 0.5 mm      |
| Nominale max:         | 0.05 mm     |
| Min nominale:         | -0.05 mm    |
| Critico min:          | -0.5 mm     |
| Posizioni decimali:   | 3           |
| Statistiche           |             |
| Distanza massima:     | 0.809828 mm |
| Distanza media:       | 0.036907 mm |
| Deviazione standard:  | 0.076060 mm |

Triangoli correnti: 368.215  
Triangoli selezionati: 0

Pulsante centrale: Ruota | Maiusc+Pulsante destro: Zoom | AR+Pulsante centrale: Panoramica

## Trios 3 as reference (best accuracy) vs trios 2

The screenshot displays the Geomagic Studio 12 interface. The main window shows a 3D model of a mechanical part with a color-coded registration error map. The error scale ranges from -0.500 mm (blue) to 0.500 mm (red). The model shows a top flange with four vertical supports. The registration error is mostly green, indicating a deviation between 0.050 mm and 0.250 mm.

The dialog box on the right, titled "Finestra di dialogo", shows the "Registrazione globale" settings. The "Operazioni" section includes icons for registration. The "Visualizzazione" section shows "Tutti gli oggetti" selected. The "Spettro" section shows the following registration statistics:

| Statistica          | Valore      |
|---------------------|-------------|
| Distanza massima    | 0.809828 mm |
| Distanza media      | 0.036907 mm |
| Deviazione standard | 0.076060 mm |

At the bottom left, the status bar indicates: Triangoli correnti: 368.215, Triangoli selezionati: 0. The bottom status bar also contains navigation instructions: Pulsante centrale: Ruota | Maiusc+Pulsante destro: Zoom | Alt+Pulsante centrale: Panoramica.



## Trios 3 as reference (best accuracy) vs trios 2

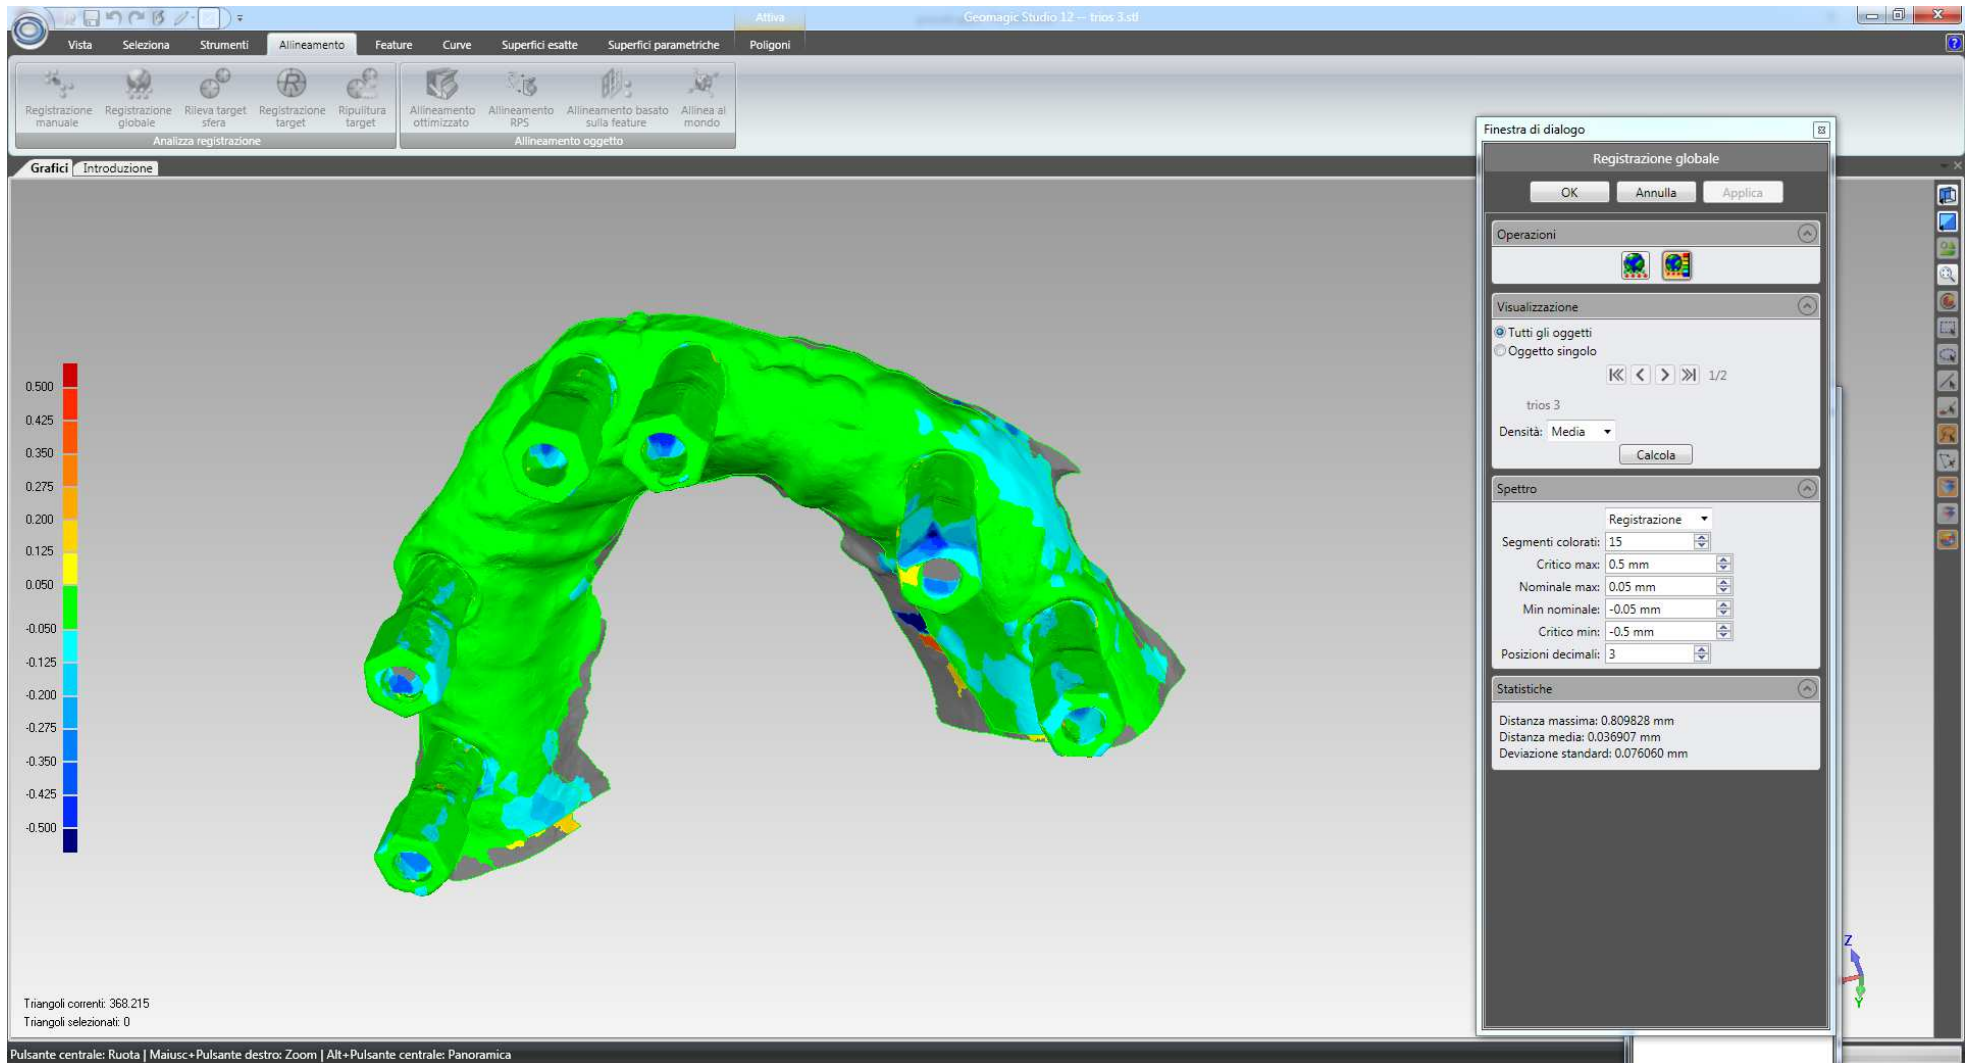

## Trios 3 as reference (best accuracy) vs trios 2

The screenshot shows the Geomagic Studio 12 interface. The main window displays a 3D model of a dental arch with a color-coded registration error map. The color scale on the left ranges from -0.500 (dark blue) to 0.500 (dark red). The model shows a significant area of error (yellow and red) on the upper arch, indicating a misalignment between the two scans.

The dialog box on the right, titled "Finestra di dialogo", contains the following information:

- Registrazione globale:** OK, Annulla, Applica
- Operazioni:** [Icons]
- Visualizzazione:** Tutti gli oggetti (selected), Oggetto singolo. Navigation buttons: <<, <, >, >>, 1/2. Object: trios 3. Density: Media. Button: Calcola.
- Spettro:** Registrazione. Segmenti colorati: 15. Critico max: 0.5 mm. Nominale max: 0.05 mm. Min nominale: -0.05 mm. Critico min: -0.5 mm. Posizioni decimali: 3.
- Statistiche:** Distanza massima: 0.809828 mm. Distanza media: 0.036907 mm. Deviazione standard: 0.076060 mm.

At the bottom left, the status bar shows: Triangoli correnti: 368.215, Triangoli selezionati: 0. At the bottom center, the navigation controls are: Pulsante centrale: Ruota | Maiusc+Pulsante destro: Zoom | Alt+Pulsante centrale: Panoramica.

## Trios 3 as reference (best accuracy) vs trios 4

The screenshot displays the Geomagic Studio 12 interface. The main window shows a 3D model of a curved mechanical part with a color-coded surface deviation map. The color scale on the left ranges from -0.500 (dark blue) to 0.500 (dark red). The part is primarily green, indicating low deviation, with some blue and red areas. The software interface includes a menu bar, a toolbar with registration and alignment tools, and a 'Finestra di dialogo' (Dialog Window) on the right showing registration settings and statistics.

**Finestra di dialogo - Registrazione globale**

OK Annulla Applica

Operazioni

Visualizzazione

Tutti gli oggetti  
 Oggetto singolo

trios 3

Densità: Media

Calcola

Spettro

Registrazione

Segmenti colorati: 15

Critico max: 0.5 mm

Nominale max: 0.05 mm

Min nominale: -0.05 mm

Critico min: -0.5 mm

Posizioni decimali: 3

Statistiche

Distanza massima: 0.820465 mm  
Distanza media: 0.058395 mm  
Deviazione standard: 0.087394 mm

Triangoli correnti: 364.688  
Triangoli selezionati: 0

Pulsante centrale: Ruota | Maiusc+ Pulsante destro: Zoom | Alt+ Pulsante centrale: Panoramica

## Trios 3 as reference (best accuracy) vs trios 4

The screenshot displays the Geomagic Studio 12 interface. The main window shows a 3D model of a mechanical part with a color-coded registration error map. The error scale ranges from -0.500 mm (blue) to 0.500 mm (red). The model is primarily green, indicating low error, with some blue and yellow areas. A vertical color scale is visible on the left side of the main window.

The software interface includes a menu bar with options like Vista, Selezione, Strumenti, Allineamento, Feature, Curve, Superfici esatte, Superfici parametriche, and Poligoni. Below the menu bar is a toolbar with various registration and alignment tools.

The main window title is "Geomagic Studio 12 -- trios 3.stl". The status bar at the bottom shows "Triangoli correnti: 364.688" and "Triangoli selezionati: 0".

The "Finestra di dialogo" (Dialog Window) is open, showing the "Registrazione globale" (Global Registration) settings. The "Operazioni" (Operations) section shows "Tutti gli oggetti" (All objects) selected. The "Visualizzazione" (Visualization) section shows "Tutti gli oggetti" (All objects) selected. The "Spettro" (Spectrum) section shows "Registrazione" (Registration) selected, with "Segmenti colorati" (Colored segments) set to 15. The "Statistiche" (Statistics) section shows the following values:

- Distanza massima: 0.820465 mm
- Distanza media: 0.058395 mm
- Deviazione standard: 0.087394 mm

The Windows taskbar at the bottom shows the system tray with the date and time: 09:16 27/12/2015.

## Trios 3 as reference (best accuracy) vs trios 4

The screenshot displays the Geomagic Studio 12 interface. The main window shows a 3D model of a mechanical part with a color-coded registration error map. The error map ranges from -0.500 mm (blue) to 0.500 mm (red). A dialog box on the right shows registration statistics:

| Registrazione globale                              |          |
|----------------------------------------------------|----------|
| OK Annulla Applica                                 |          |
| Operazioni                                         |          |
| Visualizzazione                                    |          |
| <input checked="" type="radio"/> Tutti gli oggetti |          |
| <input type="radio"/> Oggetto singolo              |          |
| trios 3                                            |          |
| Densità:                                           | Media    |
| Calcola                                            |          |
| Spettro                                            |          |
| Registrazione                                      |          |
| Segmenti colorati:                                 | 15       |
| Critico max:                                       | 0.5 mm   |
| Nominale max:                                      | 0.05 mm  |
| Min nominale:                                      | -0.05 mm |
| Critico min:                                       | -0.5 mm  |
| Posizioni decimali:                                | 3        |
| Statistiche                                        |          |
| Distanza massima: 0.820465 mm                      |          |
| Distanza media: 0.058395 mm                        |          |
| Deviazione standard: 0.087394 mm                   |          |

Triangoli correnti: 364.688  
Triangoli selezionati: 0

Pulsante centrale: Ruota | Maiusc+Pulsante destro: Zoom | Alt+Pulsante centrale: Panoramica

## Trios 3 as reference (best accuracy) vs trios 4

The screenshot displays the Geomagic Studio 12 interface. The main window shows a 3D model of a dental arch with six pillars. The model is color-coded by distance, with a legend on the left ranging from -0.500 to 0.500 mm. The pillars are colored in shades of green and blue, indicating a distance of approximately -0.125 to -0.250 mm. The arch is colored in shades of yellow and orange, indicating a distance of approximately 0.125 to 0.250 mm. The background is a light gray.

The software interface includes a menu bar at the top with options: Vista, Selezione, Strumenti, Allineamento, Feature, Curve, Superfici esatte, Superfici parametriche, Poligoni. Below the menu bar is a toolbar with icons for registration and alignment operations.

The dialog box on the right, titled "Finestra di dialogo", contains the following information:

- Registrazione globale**
  - OK Annulla Applica
- Operazioni**
  - Visualizzazione: Tutti gli oggetti (selected), Oggetto singolo
  - Navigation: << < > >> 1/2
  - Object: trios 3
  - Densità: Media
  - Calcola
- Spettro**
  - Registrazione
  - Segmenti colorati: 15
  - Critico max: 0.5 mm
  - Nominale max: 0.05 mm
  - Min nominale: -0.05 mm
  - Critico min: -0.5 mm
  - Posizioni decimali: 3
- Statistiche**
  - Distanza massima: 0.820465 mm
  - Distanza media: 0.058395 mm
  - Deviazione standard: 0.087394 mm

At the bottom left, the status bar shows: Triangoli correnti: 364.688, Triangoli selezionati: 0. At the bottom center, the navigation controls are: Pulsante centrale: Ruota | Maiusc+Pulsante destro: Zoom | Alt+Pulsante centrale: Panoramica.

## Trios 3 as reference (best accuracy) vs trios 5

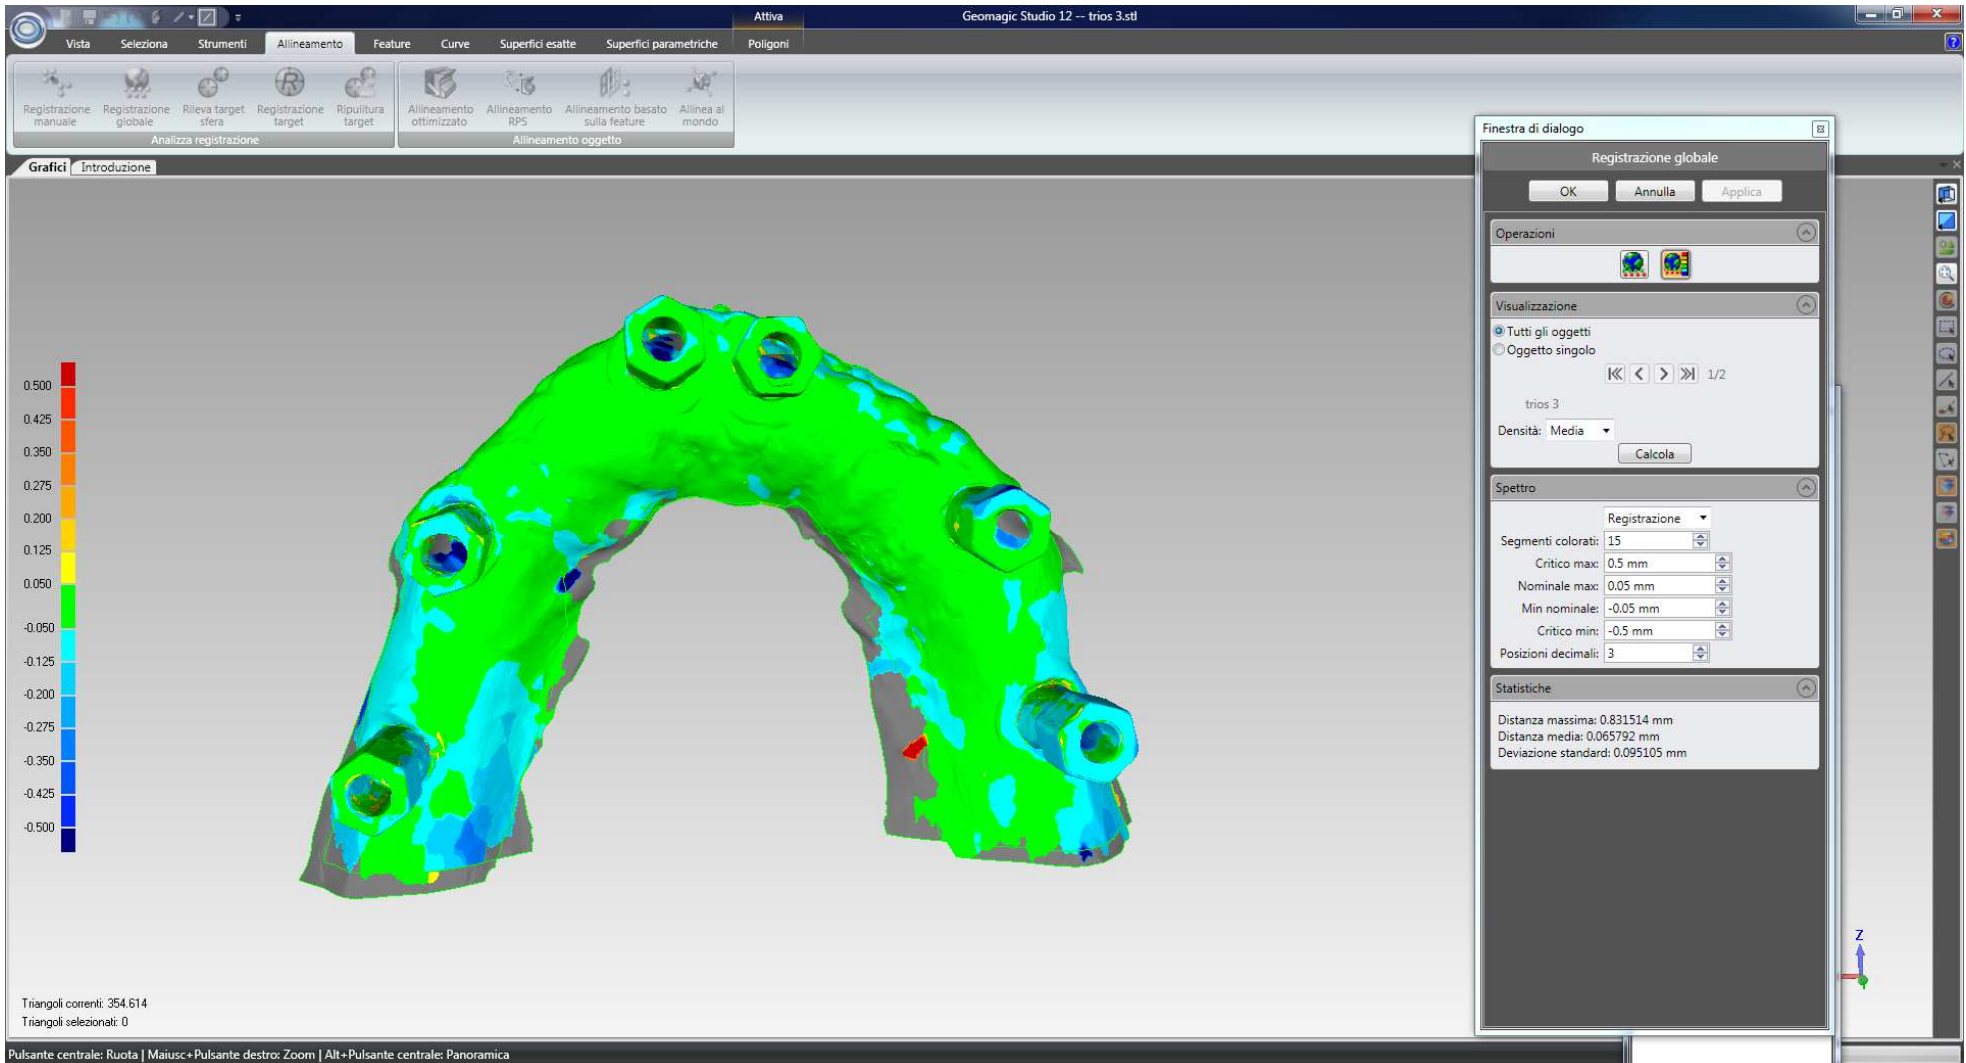

## Trios 3 as reference (best accuracy) vs trios 5

Geomagic Studio 12 -- trios 3.stl

Vista Selezione Strumenti **Allineamento** Feature Curve Superfici esatte Superfici parametriche Poligoni

Registrazione manuale Registrazione globale Rileva target sfera Registrazione target Ripulitura target

Analizza registrazione

Allineamento ottimizzato Allineamento RPS Allineamento basato sulla feature Allinea al mondo

Allineamento oggetto

Grafici Introduzione

0.500  
0.425  
0.350  
0.275  
0.200  
0.125  
0.050  
-0.050  
-0.125  
-0.200  
-0.275  
-0.350  
-0.425  
-0.500

Triangoli corenti: 354.614  
Triangoli selezionati: 0

Pulsante centrale: Ruota | Maiusc+Pulsante destro: Zoom | Alt+Pulsante centrale: Panoramica

Finestra di dialogo

Registrazione globale

OK Annulla Applica

Operazioni

Visualizzazione

Tutti gli oggetti  
 Oggetto singolo

« < > » 1/2

trios 3

Densità: Media

Calcola

Spettro

Registrazione

Segmenti colorati: 15

Critico max: 0.5 mm

Nominale max: 0.05 mm

Min nominale: -0.05 mm

Critico min: -0.5 mm

Posizioni decimali: 3

Statistiche

Distanza massima: 0.831514 mm  
Distanza media: 0.065792 mm  
Deviazione standard: 0.095105 mm



## Trios 3 as reference (best accuracy) vs trios 5

The screenshot displays the Geomagic Studio 12 interface. The main window shows a 3D model of a curved, arch-like part with a color-coded deviation map. The color scale on the left ranges from -0.500 (dark blue) to 0.500 (dark red). The model is primarily green, indicating low deviation, with some blue and red areas. The software interface includes a menu bar, a toolbar with registration and alignment tools, and a 'Finestra di dialogo' (Dialog Window) on the right showing registration statistics.

**Finestra di dialogo - Registrazione globale**

Operazioni: [Icona]

Visualizzazione:  Tutti gli oggetti,  Oggetto singolo

trios 3

Densità: Media

Spettro: Registrazione

Segmenti colorati: 15

Critico max: 0.5 mm

Nominale max: 0.05 mm

Min nominale: -0.05 mm

Critico min: -0.5 mm

Posizioni decimali: 3

Statistiche:

Distanza massima: 0.831514 mm

Distanza media: 0.065792 mm

Deviazione standard: 0.095105 mm

Triangoli correnti: 354.614

Triangoli selezionati: 0

Pulsante centrale: Ruota | Maiusc+Pulsante destro: Zoom | Alt+Pulsante centrale: Panoramica

## Trios 3 as reference (best accuracy) vs trios 5

The screenshot displays the Geomagic Studio 12 interface. The main window shows a 3D model of a mechanical part with a color-coded registration error map. The color scale on the left ranges from -0.500 (blue) to 0.500 (red). The registration error is mostly green and yellow, indicating small deviations. A dialog box on the right shows registration statistics for 'trios 3'.

**Finestra di dialogo: Registrazione globale**

OK Annulla Applica

Operazioni

Visualizzazione

Tutti gli oggetti  
 Oggetto singolo

trios 3

Densità: Media

Calcola

Spettro

Registrazione

Segmenti colorati: 15

Critico max: 0.5 mm

Nominale max: 0.05 mm

Min nominale: -0.05 mm

Critico min: -0.5 mm

Posizioni decimali: 3

Statistiche

Distanza massima: 0.831514 mm  
Distanza media: 0.065792 mm  
Deviazione standard: 0.095105 mm

Triangoli corenti: 354.614  
Triangoli selezionati: 0

Pulsante centrale: Ruota | Maiusc+Pulsante destro: Zoom | Alt+Pulsante centrale: Panoramica

# Trios 2 vs trios 4

Geomagic Studio 12 -- trios 2.stl

Attiva

Vista Selezione Strumenti Allineamento Feature Curve Superfici esatte Superfici parametriche Poligoni

Registrazione manuale Registrazione globale Rileva target sfera Registrazione target Ripulitura target Analisi registrazione

Allineamento ottimizzato Allineamento RPS Allineamento basato sulla feature Allinea al mondo Allineamento oggetto

Grafici Introduzione

0.500  
0.425  
0.350  
0.275  
0.200  
0.125  
0.050  
-0.050  
-0.125  
-0.200  
-0.275  
-0.350  
-0.425  
-0.500

Triangoli correnti: 362.075  
Triangoli selezionati: 0

Pulsante centrale: Ruota | Maiusc+Pulsante destro: Zoom | Alt+Pulsante centrale: Panoramica

Finestra di dialogo

Registrazione globale

OK Annulla Applica

Operazioni

Visualizzazione

Tutti gli oggetti  
 Oggetto singolo

trios 2

Densità: Media

Calcola

Spettro

Registrazione

Segmenti colorati: 15

Critico max: 0.5 mm

Nominale max: 0.05 mm

Min nominale: -0.05 mm

Critico min: -0.5 mm

Posizioni decimali: 3

Statistiche

Distanza massima: 0.808253 mm  
Distanza media: 0.056475 mm  
Deviazione standard: 0.077920 mm

# Trios 2 vs trios 4

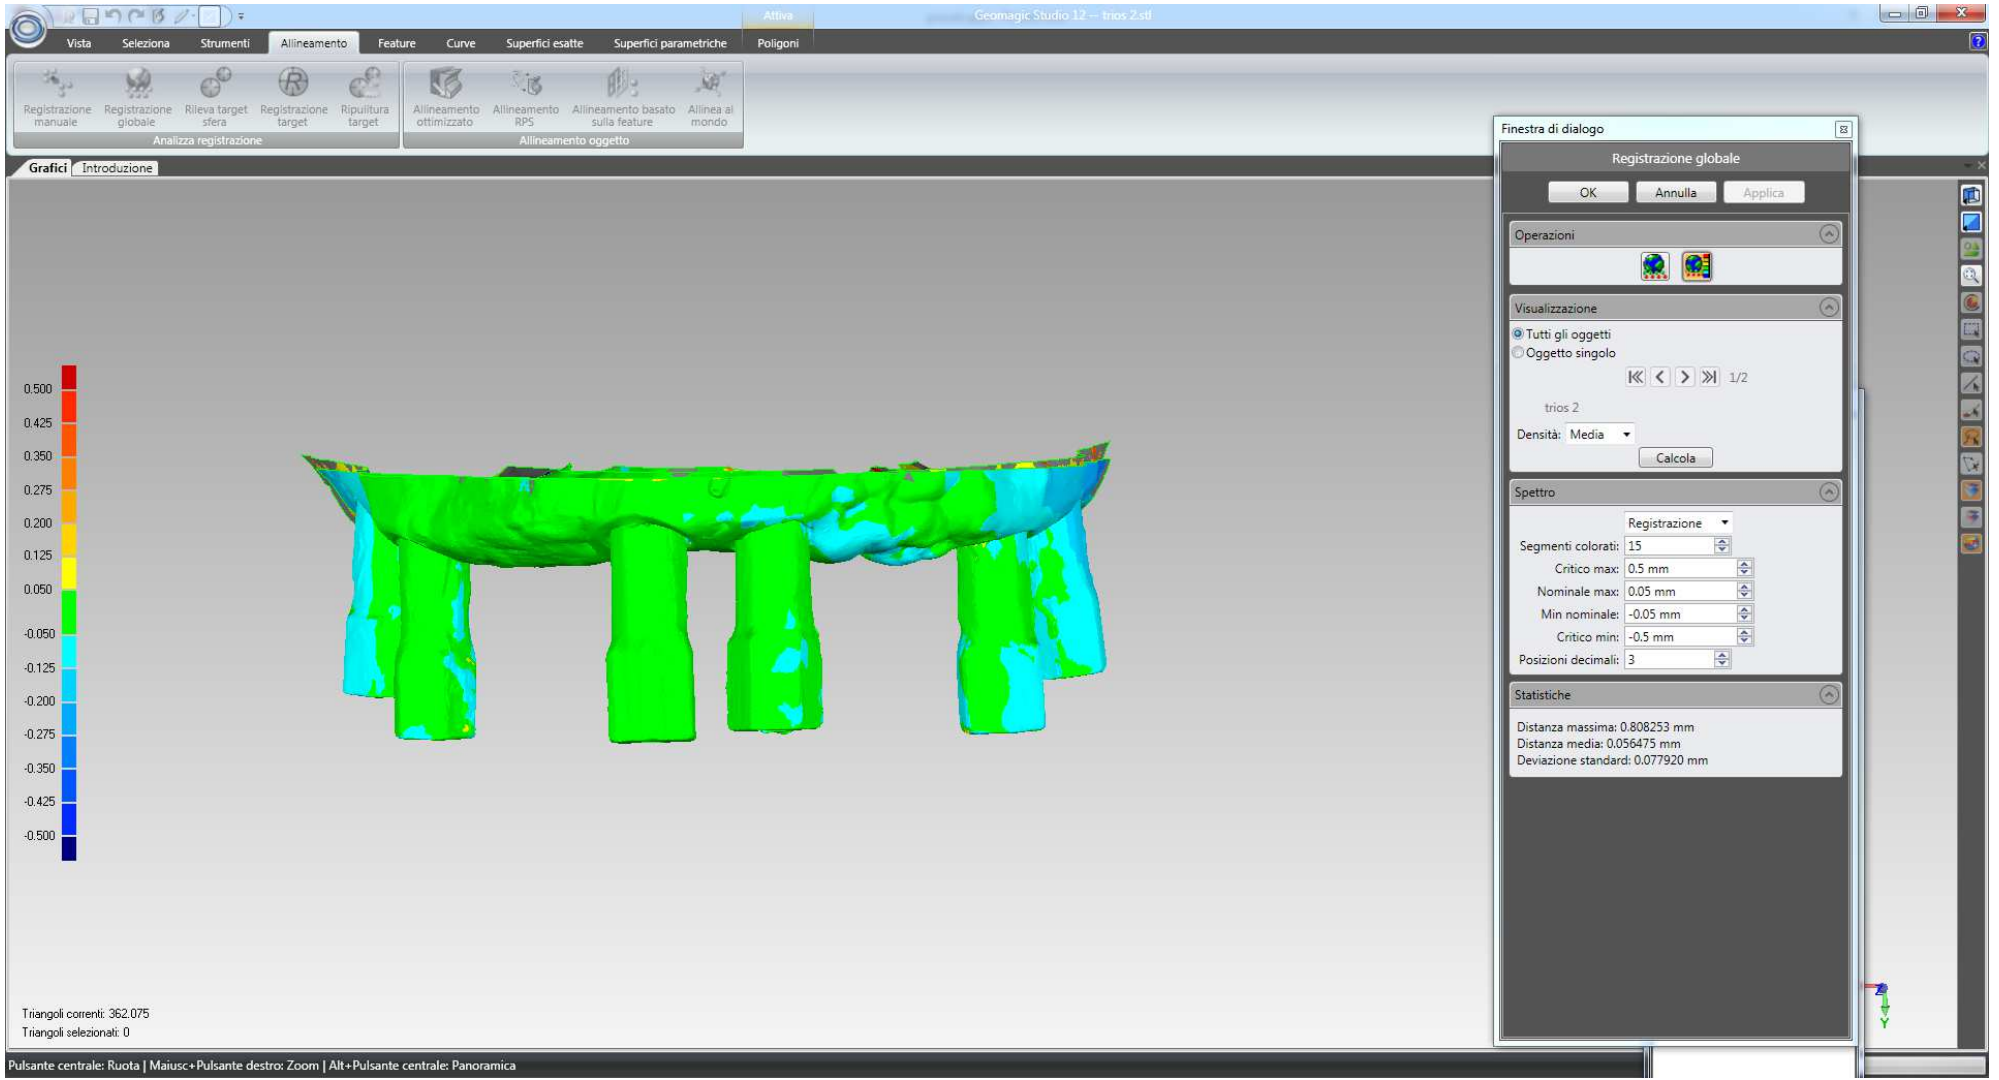

# Trios 2 vs trios 4

Geomagic Studio 12 — trios 2.stl

Vista Selezione Strumenti Allineamento Feature Curve Superfici esatte Superfici parametriche Poligoni

Registrazione manuale Registrazione globale Rileva target sfera Registrazione target Ripulitura target Allineamento ottimizzato Allineamento RPS Allineamento basato sulla feature Allinea al mondo

Analizza registrazione

Grafici Introduzione

0.500  
0.425  
0.350  
0.275  
0.200  
0.125  
0.050  
-0.050  
-0.125  
-0.200  
-0.275  
-0.350  
-0.425  
-0.500

Triangoli correnti: 362,075  
Triangoli selezionati: 0

Pulsante centrale: Ruota | Maiusc+Pulsante destro: Zoom | Alt+Pulsante centrale: Panoramica

Finestra di dialogo

Registrazione globale

OK Annulla Applica

Operazioni

Visualizzazione

Tutti gli oggetti  
 Oggetto singolo

trios 2

Densità: Media

Calcola

Spettro

Registrazione

Segmenti colorati: 15

Critico max: 0.5 mm

Nominale max: 0.05 mm

Min nominale: -0.05 mm

Critico min: -0.5 mm

Posizioni decimali: 3

Statistiche

Distanza massima: 0.808253 mm  
Distanza media: 0.056475 mm  
Deviazione standard: 0.077920 mm

# Trios 2 vs trios 4

Geomagic Studio 12 -- trios 2.stl

Vista Selezione Strumenti Allineamento Feature Curve Superfici esatte Superfici parametriche Poligoni

Registrazione manuale Registrazione globale Rileva target sfera Registrazione target Ripulitura target

Analizza registrazione

Allineamento ottimizzato Allineamento RPS Allineamento basato sulla feature Allinea al mondo

Allineamento oggetto

Grfici Introduzione

0.500  
0.425  
0.350  
0.275  
0.200  
0.125  
0.050  
-0.050  
-0.125  
-0.200  
-0.275  
-0.350  
-0.425  
-0.500

Triangoli correnti: 362.075  
Triangoli selezionati: 0

Pulsante centrale: Ruota | Maiusc+Pulsante destro: Zoom | Alt+Pulsante centrale: Panoramica

Finestra di dialogo

Registrazione globale

OK Annulla Applica

Operazioni

Visualizzazione

Tutti gli oggetti  
 Oggetto singolo

1/2

trios 2

Densità: Media

Calcola

Spettro

Registrazione

Segmenti colorati: 15

Critico max: 0.5 mm

Nominale max: 0.05 mm

Min nominale: -0.05 mm

Critico min: -0.5 mm

Posizioni decimali: 3

Statistiche

Distanza massima: 0.808253 mm  
Distanza media: 0.056475 mm  
Deviazione standard: 0.077920 mm

TRIOS overall general precision in the fully edentulous model

|              | Mean distance | SD    | Maximum distance |
|--------------|---------------|-------|------------------|
| Trios 3 vs 1 | 0.121         | 0.136 | 0.849            |
| Trios 3 vs 2 | 0.035         | 0.076 | 0.809            |
| Trios 3 vs 4 | 0.058         | 0.087 | 0.820            |
| Trios 3 vs 5 | 0.065         | 0.095 | 0.831            |
| Trios 2 vs 4 | 0.056         | 0.077 | 0.808            |

**Overall Trios general precision: 0.067 (0.032)**

## Zfx 1 as reference (best accuracy) vs Zfx 2

The screenshot displays the Geomagic Studio 12 interface. The main window shows a 3D model of a curved, arch-like part with a color-coded registration error map. The color scale on the left ranges from -0.500 mm (dark blue) to 0.500 mm (dark red). The model is primarily green and cyan, indicating low registration error. The software interface includes a menu bar (Vista, Selezione, Strumenti, Allineamento, Feature, Curve, Superfici esatte, Superfici parametriche, Poligoni) and a toolbar with various registration and alignment tools. A dialog box titled "Finestra di dialogo" is open on the right, showing the "Registrazione globale" settings. The "Operazioni" section includes icons for registration. The "Visualizzazione" section shows "Tutti gli oggetti" selected. The "Spettro" section displays registration statistics: "Segmenti colorati: 15", "Critico max: 0.5 mm", "Nominale max: 0.05 mm", "Min nominale: -0.05 mm", "Critico min: -0.5 mm", and "Posizioni decimali: 3". The "Statistiche" section shows: "Distanza massima: 0.819364 mm", "Distanza media: 0.100207 mm", and "Deviazione standard: 0.107654 mm".

Triangoli corenti: 348.062  
Triangoli selezionati: 0

Pulsante centrale: Ruota | Maiusc+Pulsante destro: Zoom | Alt+Pulsante centrale: Panoramica



## Zfx 1 as reference (best accuracy) vs Zfx 2

The screenshot displays the Geomagic Studio 12 interface. The main window shows a 3D model of a mechanical part with a color-coded registration error map. The error scale ranges from -0.500 mm (blue) to 0.500 mm (red). The model is primarily green and cyan, indicating low registration error. A dialog box titled "Finestra di dialogo" is open on the right, showing registration statistics:

- Registrazione globale
- Operazioni
- Visualizzazione: Tutti gli oggetti
- Densità: Media
- Spettro: Registrazione
- Segmenti colorati: 15
- Critico max: 0.5 mm
- Nominale max: 0.05 mm
- Min nominale: -0.05 mm
- Critico min: -0.5 mm
- Posizioni decimali: 3
- Statistiche:
  - Distanza massima: 0.819364 mm
  - Distanza media: 0.100207 mm
  - Deviazione standard: 0.107654 mm

At the bottom left, the status bar shows: Triangoli correnti: 348.062, Triangoli selezionati: 0. At the bottom, the keyboard shortcuts are: Pulsante centrale: Ruota | Maiusc+Pulsante destro: Zoom | Alt+Pulsante centrale: Panoramica.

## Zfx 1 as reference (best accuracy) vs Zfx 2

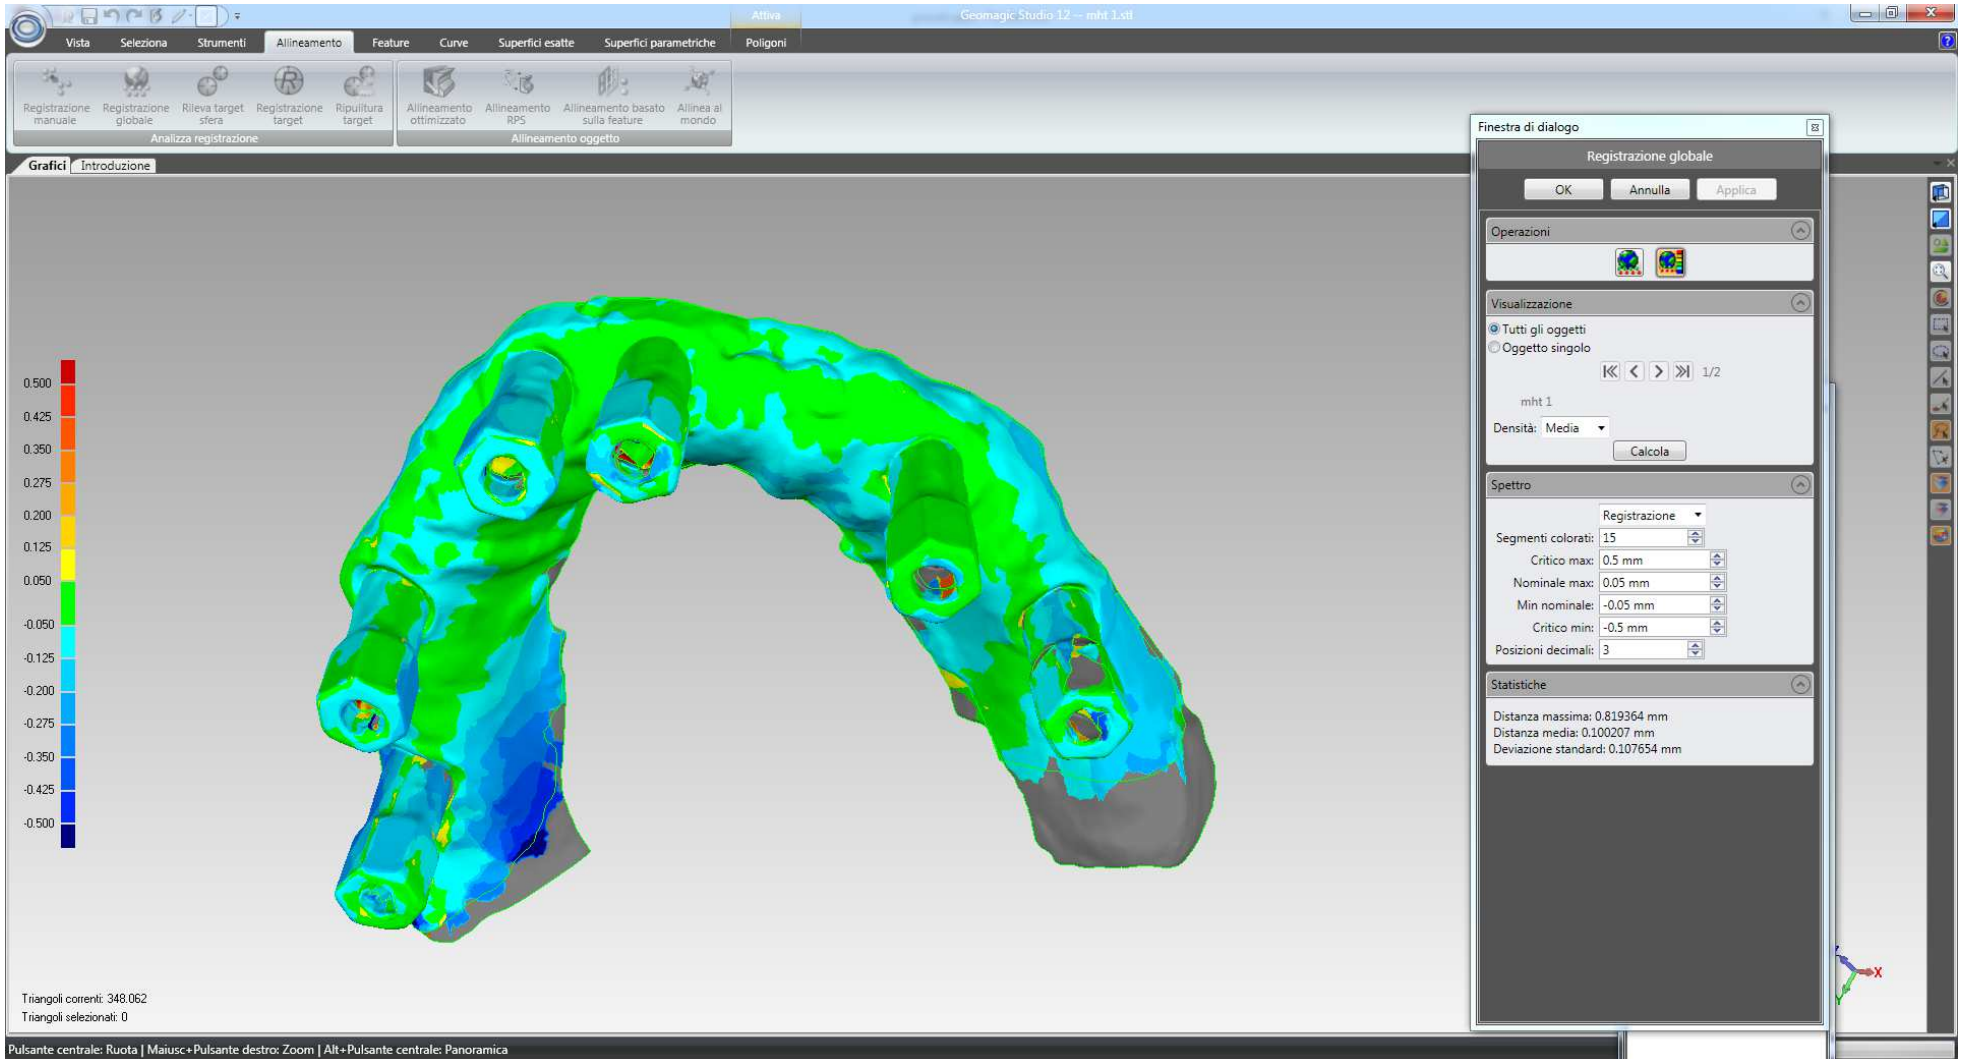

## Zfx 1 as reference (best accuracy) vs Zfx 2

The screenshot displays the Geomagic Studio 12 interface. The main window shows a 3D model of a mechanical part with a color-coded surface deviation map. The map ranges from -0.500 mm (blue) to 0.500 mm (red). A dialog box on the right, titled "Finestra di dialogo", shows registration statistics for "Registrazione globale".

**Finestra di dialogo - Registrazione globale**

Operazioni: [Globe icon] [Target icon]

Visualizzazione:  
 Tutti gli oggetti  
 Oggetto singolo  
mht 1  
Densità: Media  
Calcola

Spettro:  
Registrazione  
Segmenti colorati: 15  
Critico max: 0.5 mm  
Nominale max: 0.05 mm  
Min nominale: -0.05 mm  
Critico min: -0.5 mm  
Posizioni decimali: 3

Statistiche:  
Distanza massima: 0.819364 mm  
Distanza media: 0.100207 mm  
Deviazione standard: 0.107654 mm

Triangoli correnti: 348.062  
Triangoli selezionati: 0

Pulsante centrale: Ruota | Maiusc+Pulsante destro: Zoom | Alt+Pulsante centrale: Panoramica

## Zfx 1 as reference (best accuracy) vs Zfx 3

The screenshot shows the Geomagic Studio 12 interface. The main window displays a 3D model of a curved, arch-like part with a color-coded distance map. The color scale on the left ranges from -0.500 (dark blue) to 0.500 (dark red). The model is primarily blue and green, indicating a distance from the reference of approximately -0.125 to 0.125 mm. The top menu bar includes options like Vista, Selezione, Strumenti, Allineamento, Feature, Curve, Superfici esatte, Superfici parametriche, and Poligoni. The toolbar contains various registration and alignment tools. A dialog box titled "Finestra di dialogo" is open on the right, showing the "Registrazione globale" settings. The "Operazioni" section shows two icons. The "Visualizzazione" section has "Tutti gli oggetti" selected. The "Spettro" section shows "Registrazione" selected, with "Segmenti colorati" set to 15, "Critico max" at 0.5 mm, "Nominale max" at 0.05 mm, "Min nominale" at -0.05 mm, "Critico min" at -0.5 mm, and "Posizioni decimali" at 3. The "Statistiche" section displays: Distanza massima: 0.840356 mm, Distanza media: 0.143099 mm, and Deviazione standard: 0.138665 mm. The bottom status bar shows: Pulsante centrale: Ruota | Maiusc+Pulsante destro: Zoom | Alt+Pulsante centrale: Panoramica.

Triangoli correnti: 343.269  
Triangoli selezionati: 0

Pulsante centrale: Ruota | Maiusc+Pulsante destro: Zoom | Alt+Pulsante centrale: Panoramica

## Zfx 1 as reference (best accuracy) vs Zfx 3

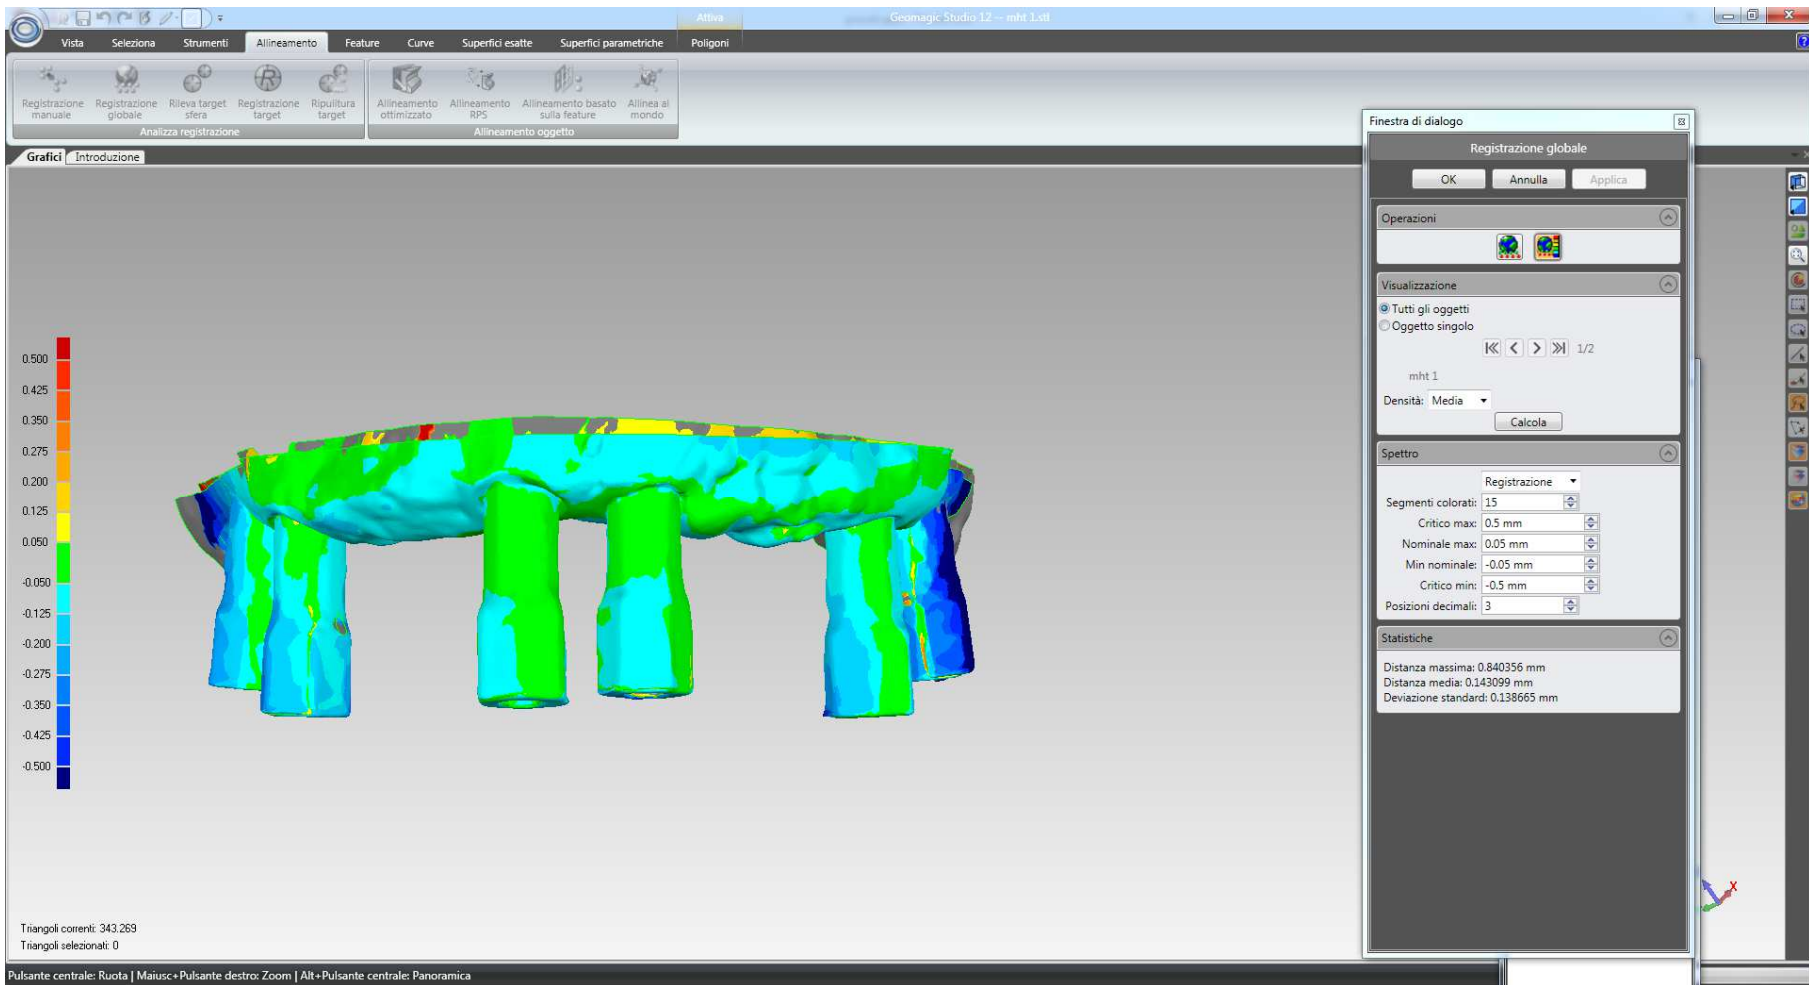

## Zfx 1 as reference (best accuracy) vs Zfx 3

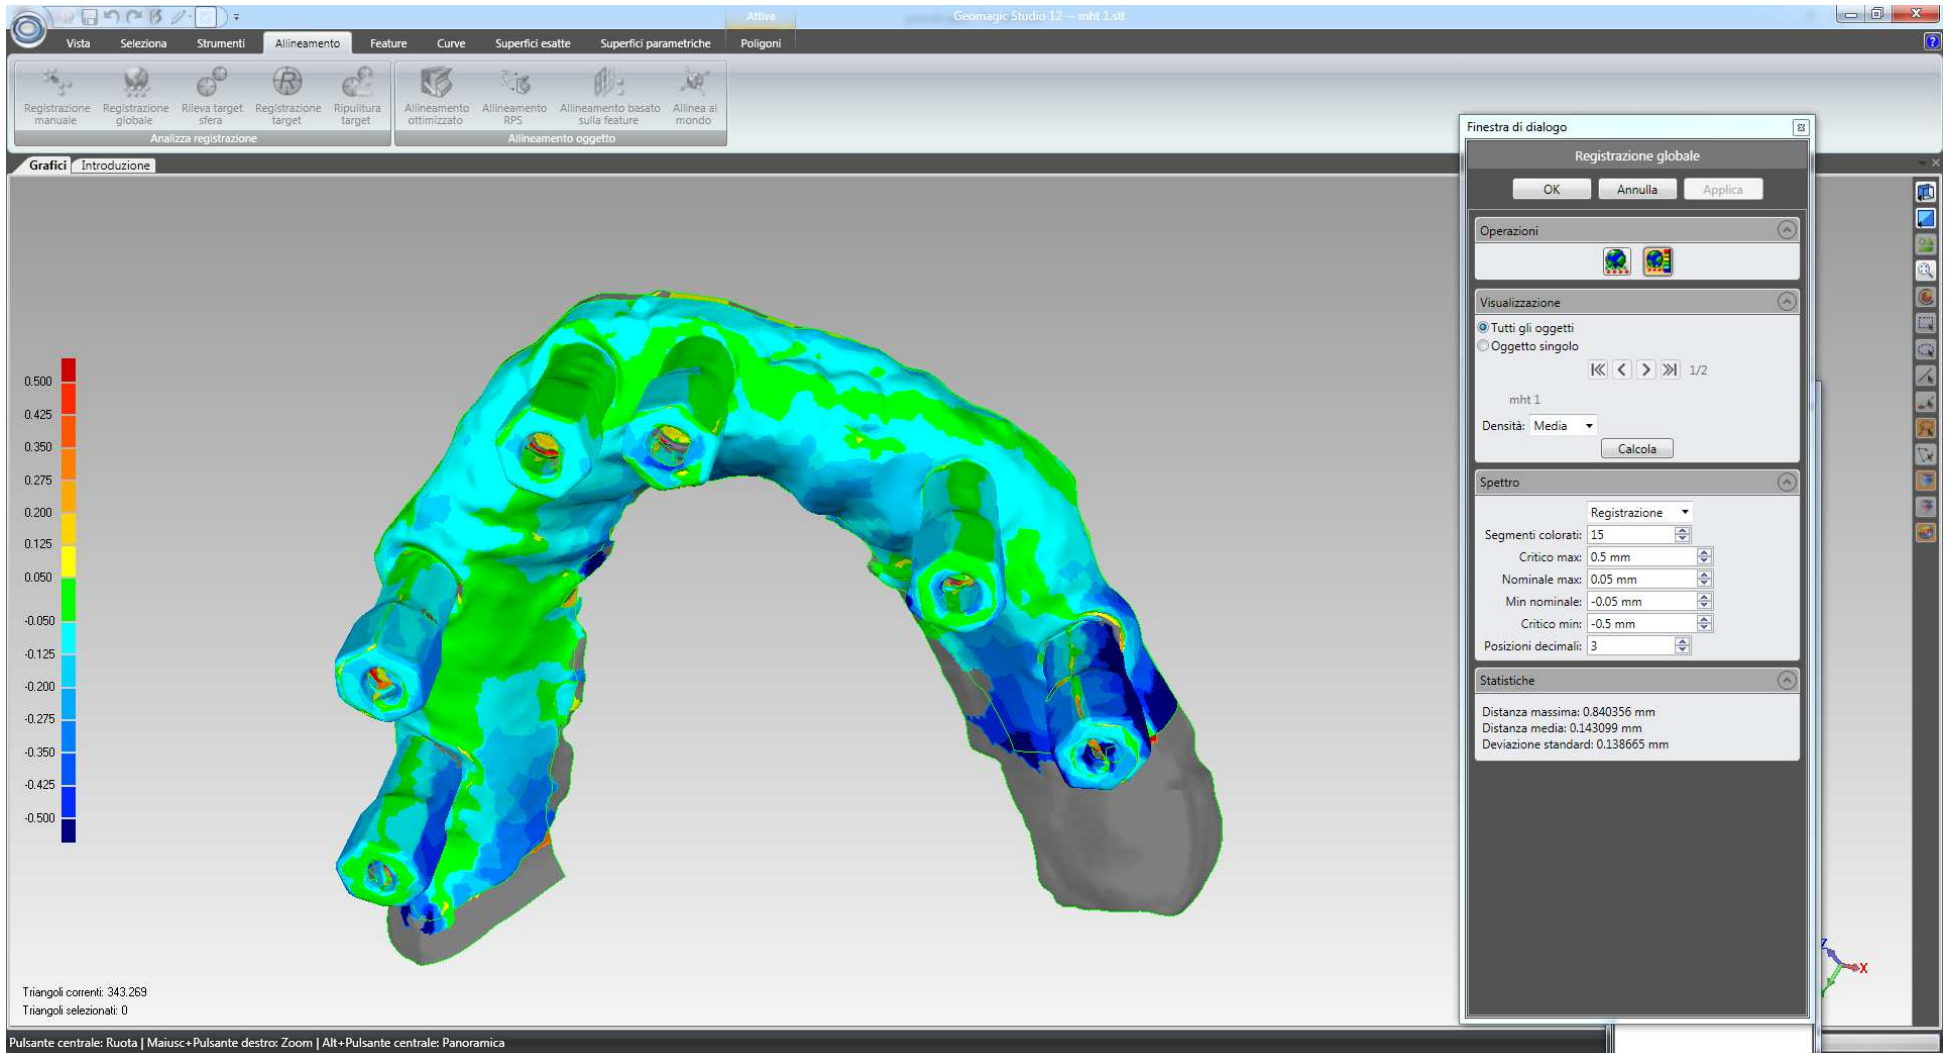

## Zfx 1 as reference (best accuracy) vs Zfx 3

The screenshot displays the Geomagic Studio 12 interface. The main window shows a 3D model of a mechanical part with a color-coded surface deviation map. The color scale on the left ranges from -0.500 to 0.500 mm. The software interface includes a menu bar, a toolbar with registration and alignment tools, and a 'Finestra di dialogo' (Dialog Window) on the right showing global registration settings and statistics.

**Finestra di dialogo - Registrazione globale**

OK Annulla Applica

Operazioni

Visualizzazione

Tutti gli oggetti  
 Oggetto singolo

mht 1

Densità: Media

Calcola

Spettro

Registrazione

Segmenti colorati: 15

Critico max: 0.5 mm

Nominale max: 0.05 mm

Min nominale: -0.05 mm

Critico min: -0.5 mm

Posizioni decimali: 3

Statistiche

Distanza massima: 0.840356 mm  
Distanza media: 0.143099 mm  
Deviazione standard: 0.138665 mm

Triangoli correnti: 343.269  
Triangoli selezionati: 0

Pulsante centrale: Ruota | Maiusc+Pulsante destro: Zoom | Alt+Pulsante centrale: Panoramica

## Zfx 1 as reference (best accuracy) vs Zfx 4

The screenshot displays the Geomagic Studio 12 interface. The main window shows a 3D model of a curved, arch-like part with a color-coded surface deviation map. The color scale on the left ranges from -0.500 (dark blue) to 0.500 (dark red). The model is centered in the main view, with a color scale on the left ranging from -0.500 to 0.500. The right side of the interface features a 'Finestra di dialogo' (Dialog Window) for 'Registrazione globale' (Global Registration) with various settings and statistics.

**Finestra di dialogo: Registrazione globale**

OK Annulla Applica

Operazioni

Visualizzazione

Tutti gli oggetti  
 Oggetto singolo

1/2

mht 1

Densità: Media

Calcola

Spettro

Registrazione

Segmenti colorati: 15

Critico max: 0.5 mm

Nominale max: 0.05 mm

Min nominale: -0.05 mm

Critico min: -0.5 mm

Posizioni decimali: 3

Statistiche

Distanza massima: 0.837963 mm  
Distanza media: 0.104074 mm  
Deviazione standard: 0.109327 mm

Triangoli coerenti: 349.959  
Triangoli selezionati: 0

Pulsante centrale: Ruota | Maiusc+Pulsante destro: Zoom | Alt+Pulsante centrale: Panoramica



## Zfx 1 as reference (best accuracy) vs Zfx 4

The screenshot displays the Geomagic Studio 12 interface. The main window shows a 3D model of a mechanical part with a color-coded registration error map. The error scale ranges from -0.500 mm (blue) to 0.500 mm (red). The right-hand side shows a 'Finestra di dialogo' (Dialog Box) for 'Registrazione globale' (Global Registration) with various settings and statistics.

**Finestra di dialogo: Registrazione globale**

OK Annulla Applica

Operazioni

Visualizzazione

Tutti gli oggetti  
 Oggetto singolo

1/2

mht 1

Densità: Media

Calcola

Spettro

Registrazione

Segmenti colorati: 15

Critico max: 0.5 mm

Nominale max: 0.05 mm

Min nominale: -0.05 mm

Critico min: -0.5 mm

Posizioni decimali: 3

Statistiche

Distanza massima: 0.837963 mm  
Distanza media: 0.104074 mm  
Deviazione standard: 0.109327 mm

Triangoli corenti: 349.959  
Triangoli selezionati: 0

Pulsante centrale: Ruota | Maiusc+Pulsante destro: Zoom | Alt+Pulsante centrale: Panoramica

## Zfx 1 as reference (best accuracy) vs Zfx 4

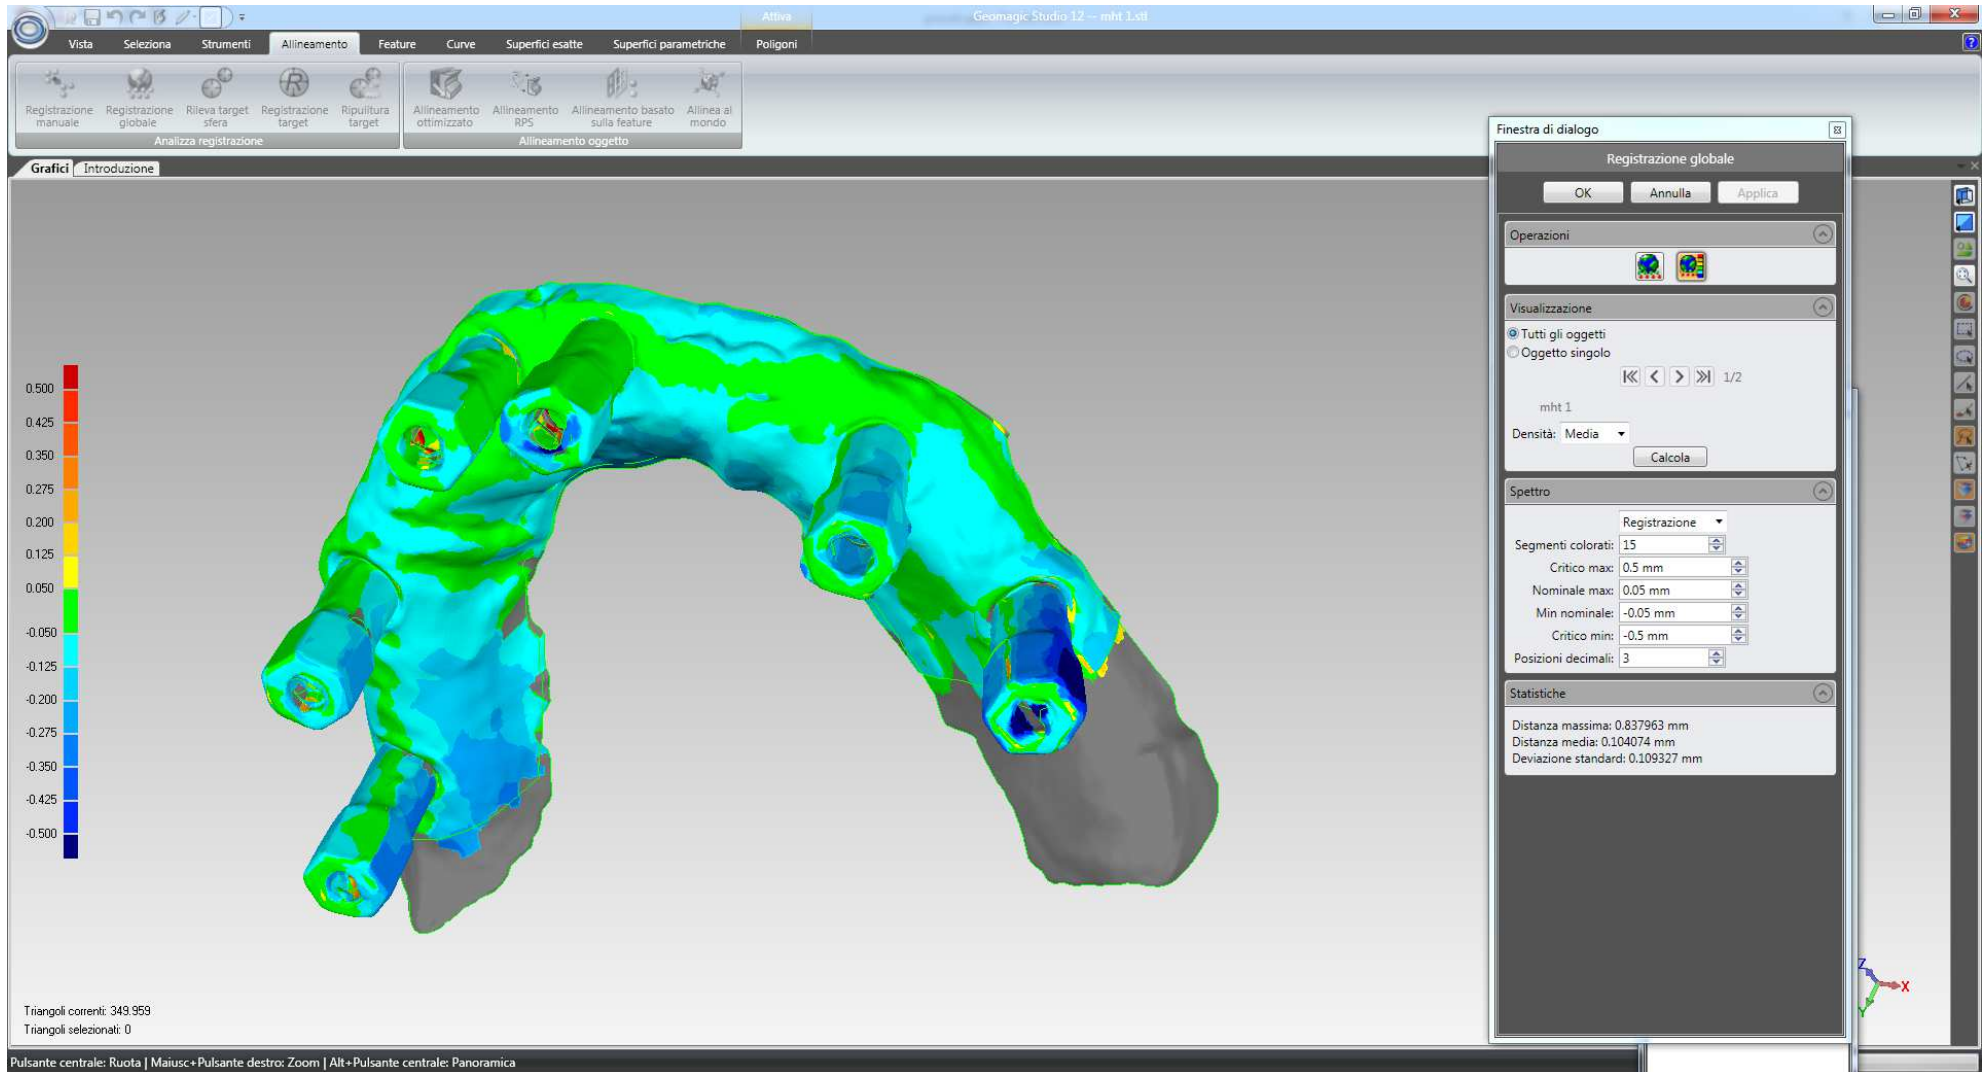

## Zfx 1 as reference (best accuracy) vs Zfx 4

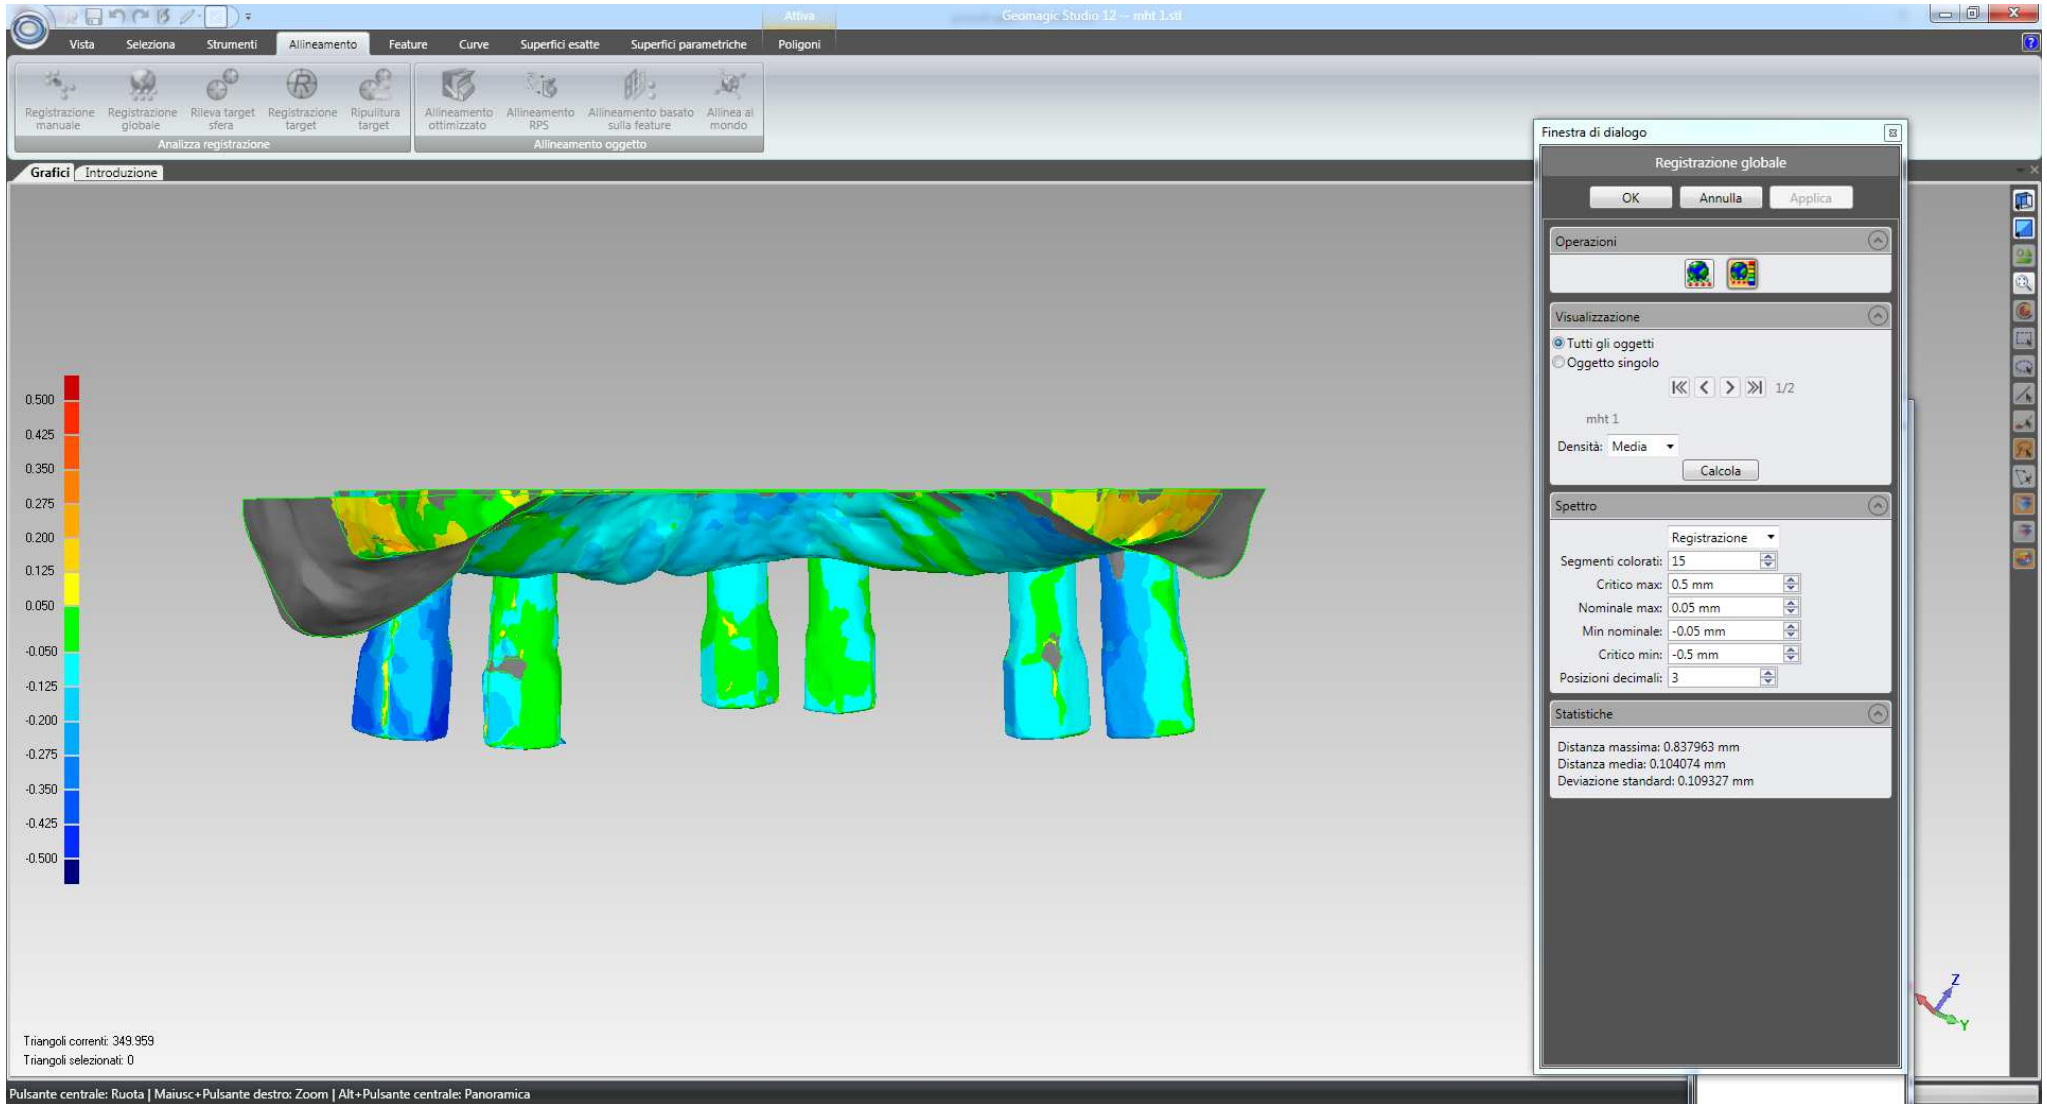

## Zfx 1 as reference (best accuracy) vs Zfx 5

The screenshot displays the Geomagic Studio 12 interface. The main window shows a 3D model of a curved, arch-like part with a color-coded registration error map. The color scale on the left ranges from -0.500 mm (dark blue) to 0.500 mm (dark red). The model is primarily green and cyan, indicating low error, with some yellow and orange areas. The software interface includes a menu bar (Vista, Selezione, Strumenti, Allineamento, Feature, Curve, Superfici esatte, Superfici parametriche, Poligoni) and a toolbar with various registration and alignment tools. A dialog box titled "Finestra di dialogo" is open on the right, showing the "Registrazione globale" settings. The "Operazioni" section has icons for registration. The "Visualizzazione" section shows "Tutti gli oggetti" selected. The "Spettro" section shows "Registrazione" selected, with "Segmenti colorati" set to 15, "Critico max" at 0.5 mm, "Nominale max" at 0.05 mm, "Min nominale" at -0.05 mm, "Critico min" at -0.5 mm, and "Posizioni decimali" at 3. The "Statistiche" section shows: Distanza massima: 0.815631 mm, Distanza media: 0.087652 mm, and Deviazione standard: 0.101599 mm. The status bar at the bottom indicates "Triangoli correnti: 355.477" and "Triangoli selezionati: 0".

Triangoli correnti: 355.477  
Triangoli selezionati: 0

Pulsante centrale: Ruota | Maiusc+Pulsante destro: Zoom | Alt+Pulsante centrale: Panoramica

## Zfx 1 as reference (best accuracy) vs Zfx 5

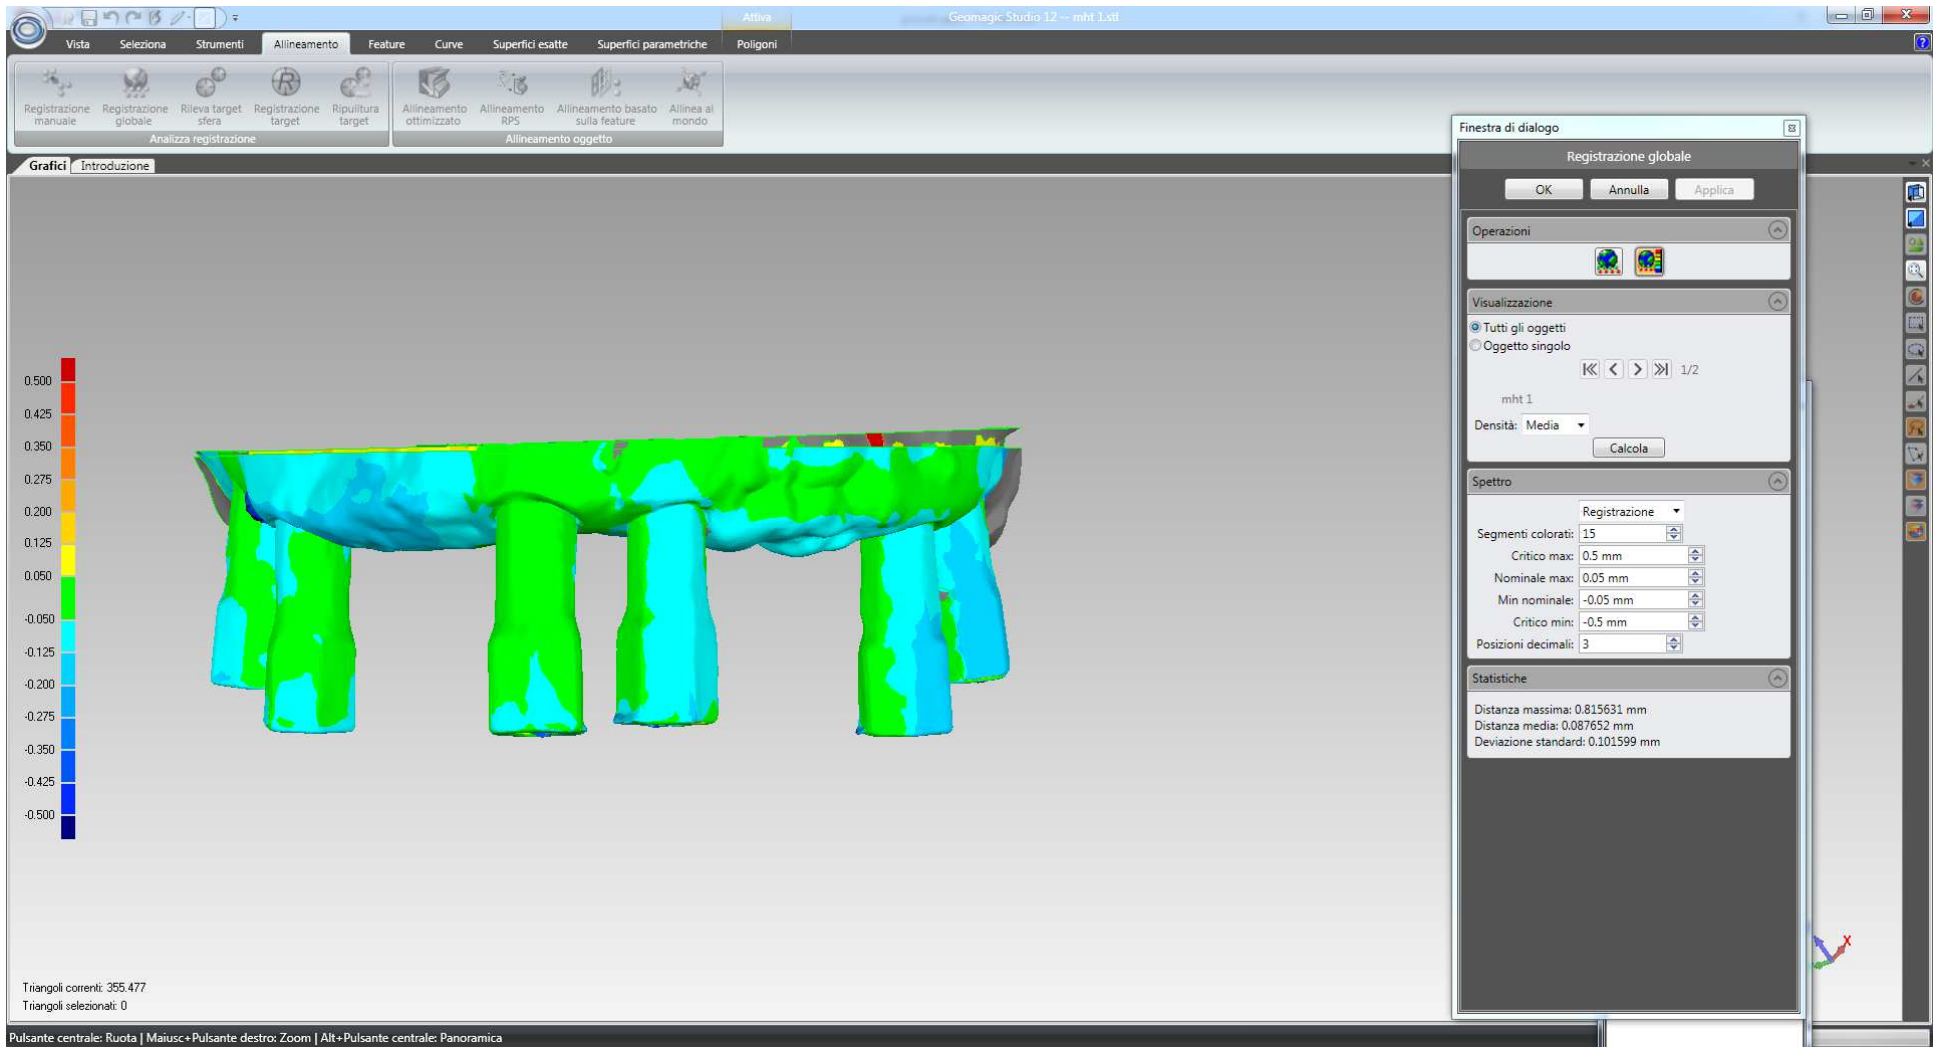

## Zfx 1 as reference (best accuracy) vs Zfx 5

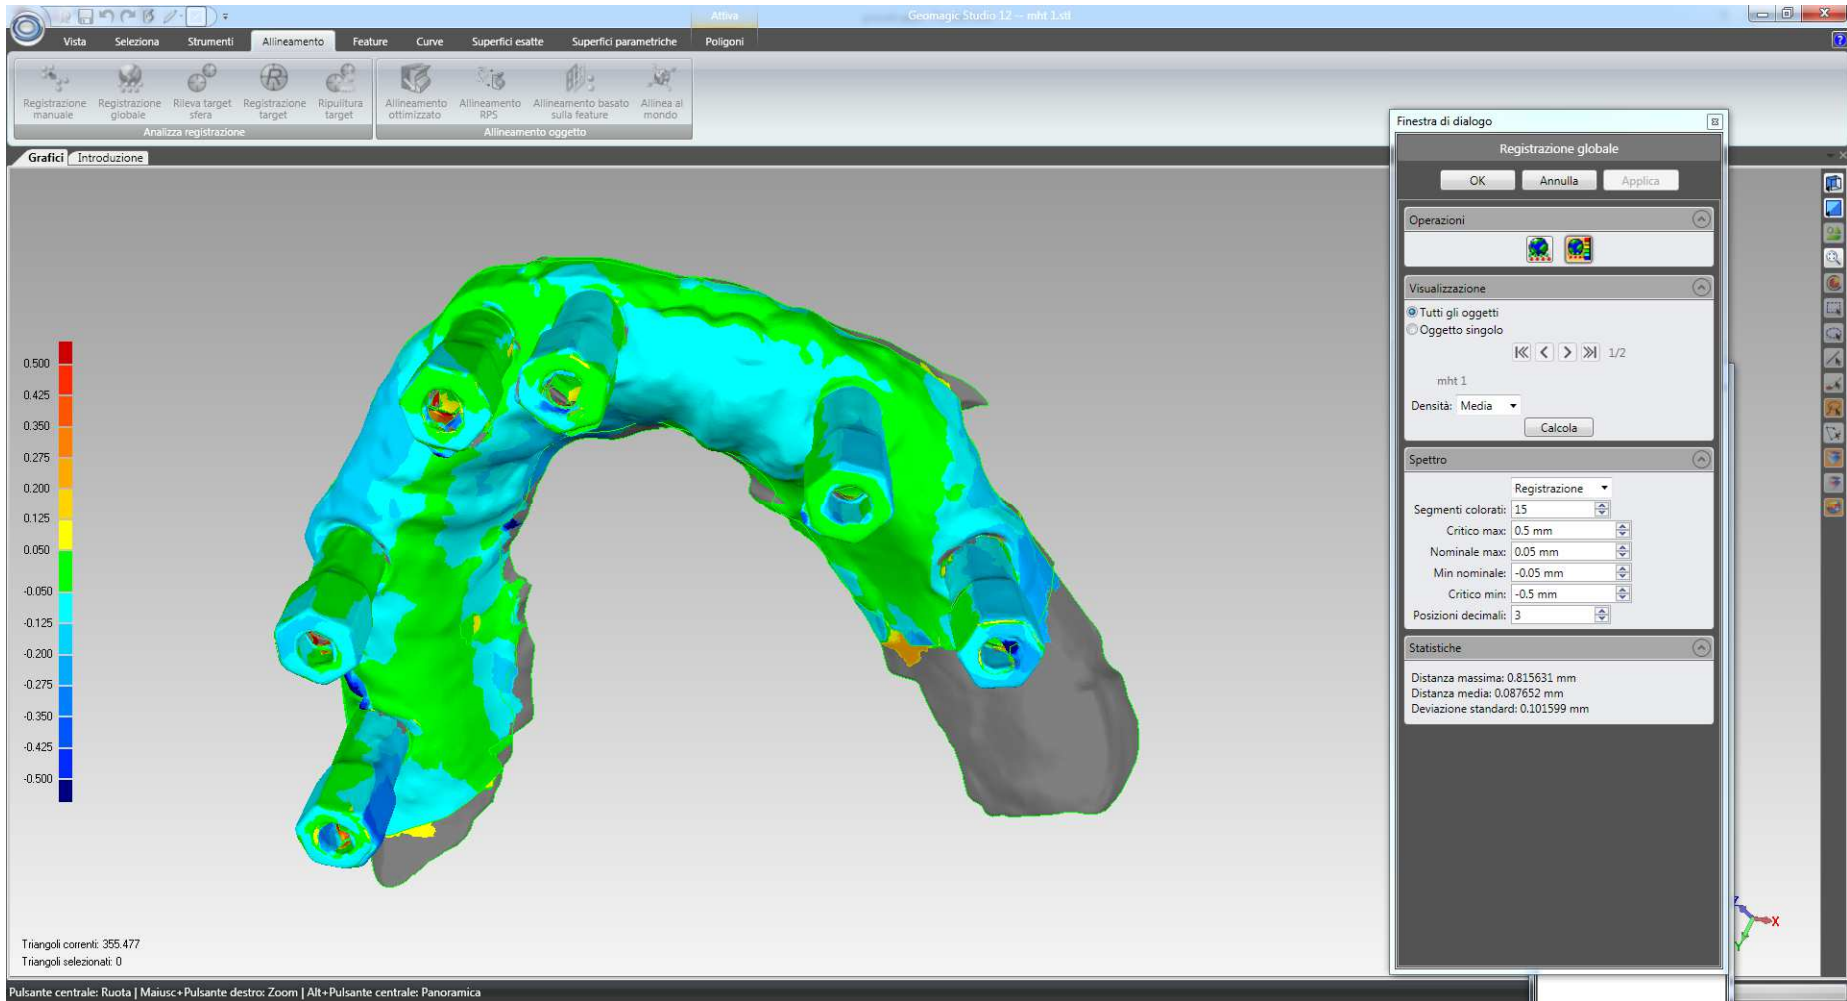

## Zfx 1 as reference (best accuracy) vs Zfx 5

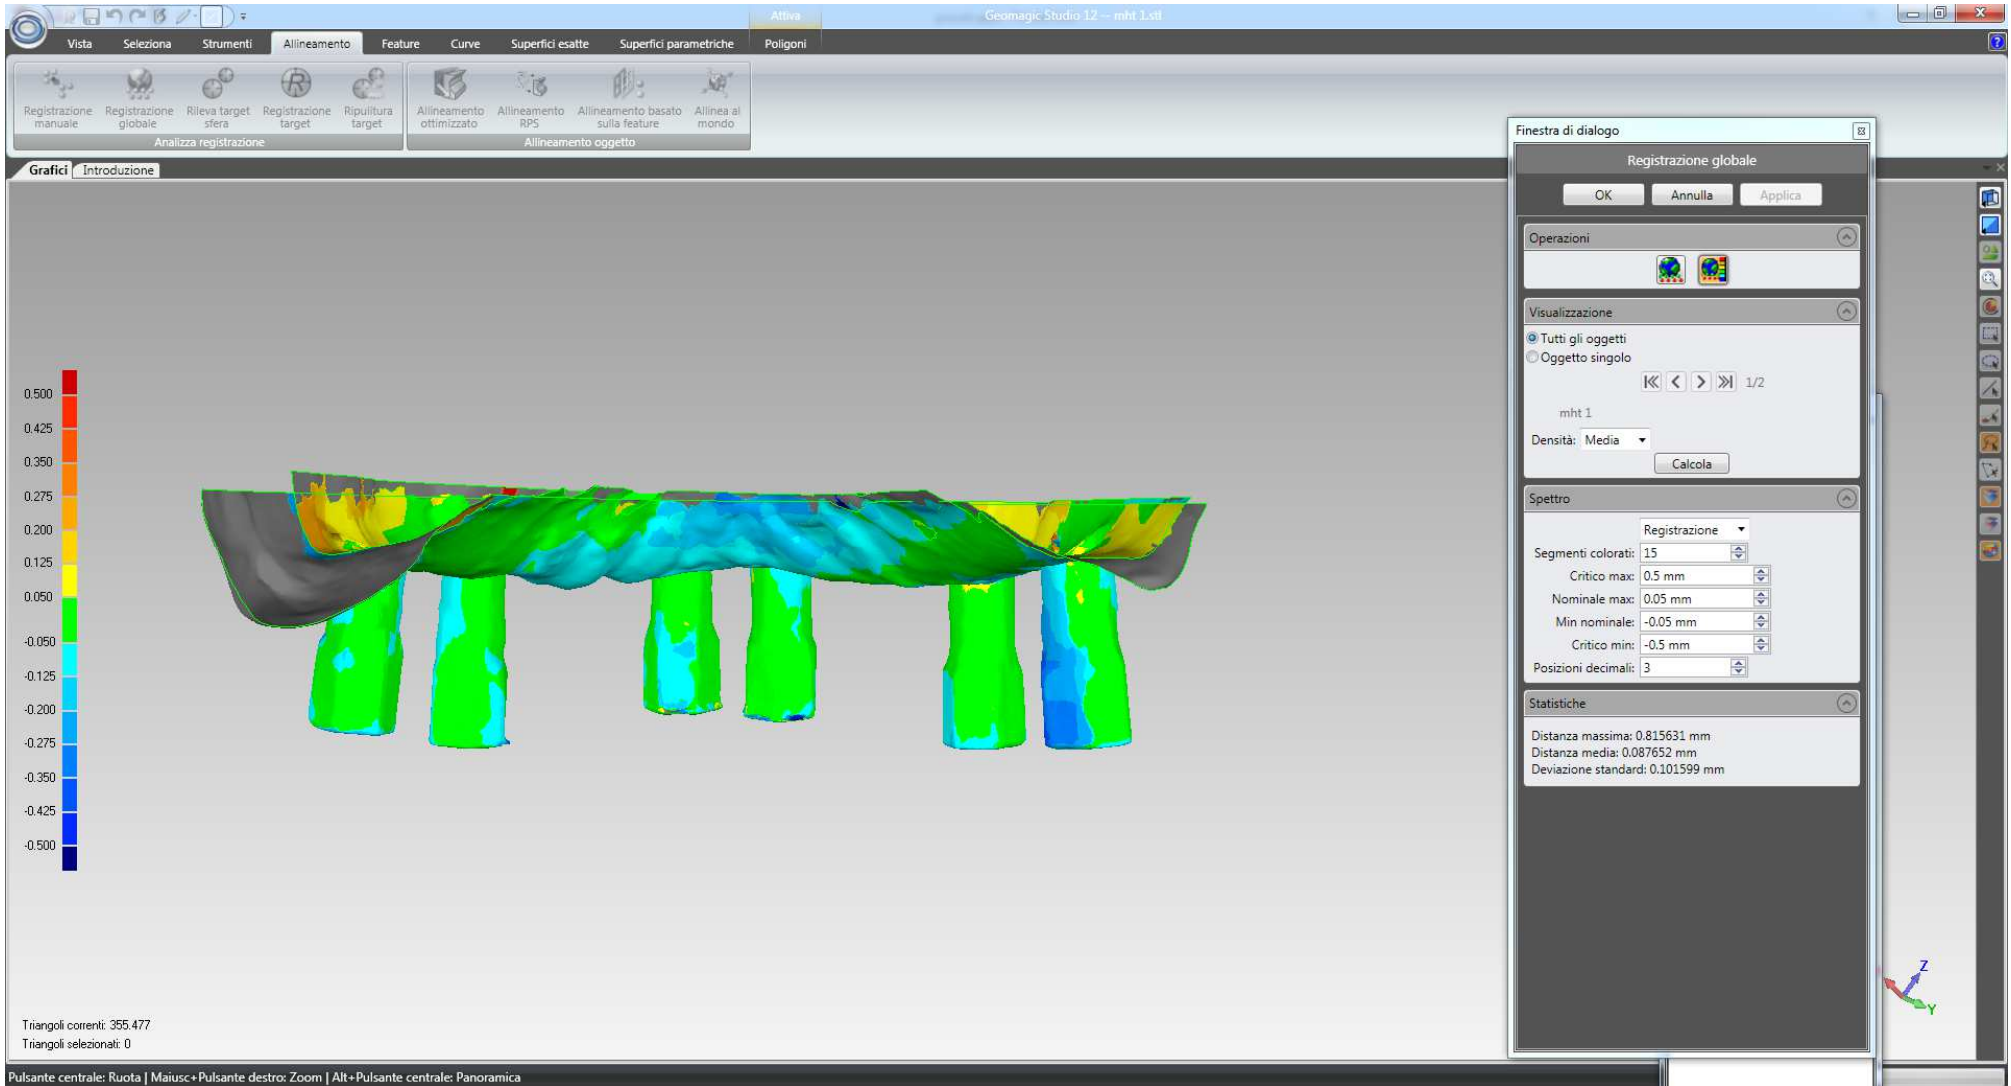

# Zfx 2 vs Zfx 4

Geomagic Studio 12 -- mht 2.stl

Vista Selezione Strumenti Allineamento Feature Curve Superfici esatte Superfici parametriche Poligoni

Registrazione manuale Registrazione globale Rileva target sfera Registrazione target Ripulitura target

Analizza registrazione

Allineamento ottimizzato Allineamento RPS Allineamento basato sulla feature Allinea al mondo

Allineamento oggetto

Grafici Introduzione

0.500  
0.425  
0.350  
0.275  
0.200  
0.125  
0.050  
-0.050  
-0.125  
-0.200  
-0.275  
-0.350  
-0.425  
-0.500

Triangoli correnti: 334.957  
Triangoli selezionati: 0

Pulsante centrale: Ruota | Maiusc+Pulsante destro: Zoom | Alt+Pulsante centrale: Panoramica

Finestra di dialogo

Registrazione globale

OK Annulla Applica

Operazioni

Visualizzazione

Tutti gli oggetti  
 Oggetto singolo

mht 2

Densità: Media

Calcola

Spettro

Registrazione

Segmenti colorati: 15

Critico max: 0.5 mm

Nominale max: 0.05 mm

Min nominale: -0.05 mm

Critico min: -0.5 mm

Posizioni decimali: 3

Statistiche

Distanza massima: 0.838259 mm  
Distanza media: 0.128705 mm  
Deviazione standard: 0.136294 mm



# Zfx 2 vs Zfx 4

Geomagic Studio 12 -- mht 2.stl

Vista Selezione Strumenti Allineamento Feature Curve Superfici esatte Superfici parametriche Poligoni

Registrazione manuale Registrazione globale Rileva target sfera Registrazione target Ripulitura target Analizza registrazione

Allineamento ottimizzato Allineamento RPS Allineamento basato sulla feature Allinea al mondo Allineamento oggetto

Grafici Introduzione

0.500  
0.425  
0.350  
0.275  
0.200  
0.125  
0.050  
-0.050  
-0.125  
-0.200  
-0.275  
-0.350  
-0.425  
-0.500

Triangoli correnti: 334.957  
Triangoli selezionati: 0

Pulsante centrale: Ruota | Maiusc+Pulsante destro: Zoom | Alt+Pulsante centrale: Panoramica

Finestra di dialogo

Registrazione globale

OK Annulla Applica

Operazioni

Visualizzazione

Tutti gli oggetti  
 Oggetto singolo

1/2

mht 2

Densità: Media

Calcola

Spettro

Registrazione

Segmenti colorati: 15

Critico max: 0.5 mm

Nominale max: 0.05 mm

Min nominale: -0.05 mm

Critico min: -0.5 mm

Posizioni decimali: 3

Statistiche

Distanza massima: 0.838259 mm  
Distanza media: 0.128705 mm  
Deviazione standard: 0.136294 mm

# Zfx 2 vs Zfx 4

Geomagic Studio 12 -- mht 2.stl

Vista Selezione Strumenti Allineamento Feature Curve Superfici esatte Superfici parametriche Poligoni

Registrazione manuale Registrazione globale Rileva target sfera Registrazione target Ripulitura target Analizza registrazione

Allineamento ottimizzato Allineamento RPS Allineamento basato sulla feature Allinea al mondo Allineamento oggetto

Grafici Introduzione

0.500  
0.425  
0.350  
0.275  
0.200  
0.125  
0.050  
-0.050  
-0.125  
-0.200  
-0.275  
-0.350  
-0.425  
-0.500

Triangoli correnti: 334.957  
Triangoli selezionati: 0

Pulsante centrale: Ruota | Maiusc+Pulsante destro: Zoom | Alt+Pulsante centrale: Panoramica

Finestra di dialogo

Registrazione globale

OK Annulla Applica

Operazioni

Visualizzazione

Tutti gli oggetti  
 Oggetto singolo

« « « » » » 1/2

mht 2

Densità: Media

Calcola

Spettro

Registrazione

Segmenti colorati: 15

Critico max: 0.5 mm

Nominale max: 0.05 mm

Min nominale: -0.05 mm

Critico min: -0.5 mm

Posizioni decimali: 3

Statistiche

Distanza massima: 0.838259 mm  
Distanza media: 0.128705 mm  
Deviazione standard: 0.136294 mm

# Zfx 2 vs Zfx 4

Geomagic Studio 12 -- mht 2.stl

Vista Selezione Strumenti Allineamento Feature Curve Superfici esatte Superfici parametriche Poligoni

Registrazione manuale Registrazione globale Rileva target sfera Registrazione target Ripulitura target Analizza registrazione

Allineamento ottimizzato Allineamento RPS Allineamento basato sulla feature Allinea al mondo Allineamento oggetto

Grafici Introduzione

0.500  
0.425  
0.350  
0.275  
0.200  
0.125  
0.050  
-0.050  
-0.125  
-0.200  
-0.275  
-0.350  
-0.425  
-0.500

Triangoli correnti: 334.957  
Triangoli selezionati: 0

Pulsante centrale: Ruota | Maiusc+Pulsante destro: Zoom | Alt+Pulsante centrale: Panoramica

Finestra di dialogo

Registrazione globale

OK Annulla Applica

Operazioni

Visualizzazione

Tutti gli oggetti  
 Oggetto singolo

mht 2

Densità: Media

Calcola

Spettro

Registrazione

Segmenti colorati: 15

Critico max: 0.5 mm

Nominale max: 0.05 mm

Min nominale: -0.05 mm

Critico min: -0.5 mm

Posizioni decimali: 3

Statistiche

Distanza massima: 0.838259 mm  
Distanza media: 0.128705 mm  
Deviazione standard: 0.136294 mm

General precision Zfx in the totally edentulous patient

|                | Mean distance | SD    | Maximum distance |
|----------------|---------------|-------|------------------|
| Zfx 1 vs Zfx 2 | 0.100         | 0.107 | 0.819            |
| Zfx 1 vs Zfx 3 | 0.143         | 0.138 | 0.840            |
| Zfx 1 vs Zfx 4 | 0.104         | 0.109 | 0.837            |
| Zfx 1 vs Zfx 5 | 0.087         | 0.101 | 0.815            |
| Zfx 2 vs Zfx 4 | 0.128         | 0.136 | 0.838            |

**Overall Mht general precision: 0.112 (0.022)**

# Care 4 as reference (best accuracy) vs Care 1

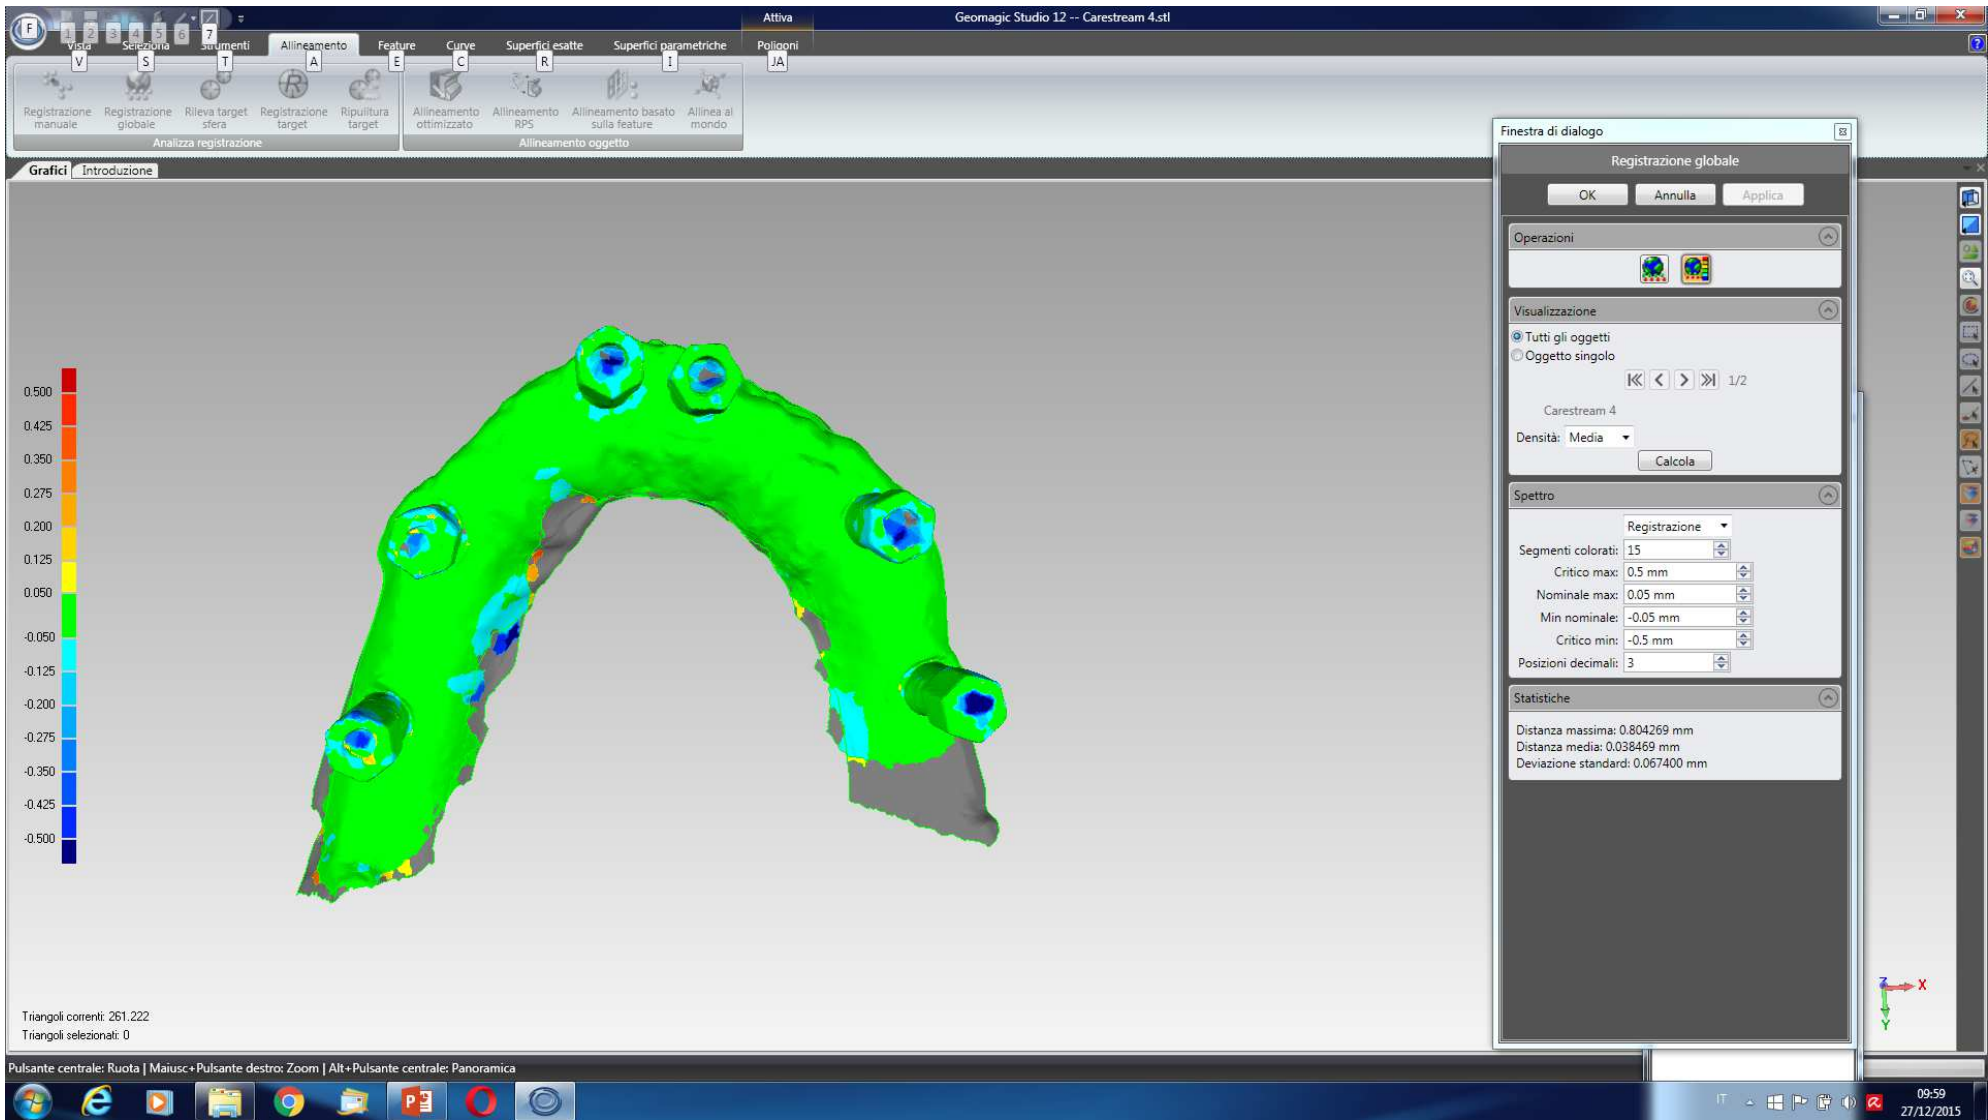

# Care 4 as reference (best accuracy) vs Care 1

The screenshot shows the Geomagic Studio 12 interface with the 'Allineamento' (Alignment) tab active. The main workspace displays a 3D model of a mechanical part with a color-coded registration error map. A vertical color scale on the left ranges from -0.500 (blue) to 0.500 (red). The model shows a top surface and four vertical pillars. The registration error is mostly green and yellow, indicating a high level of accuracy.

The 'Finestra di dialogo' (Dialog Box) is open, showing the 'Registrazione globale' (Global Registration) settings. The 'Operazioni' (Operations) section shows the 'Registrazione globale' (Global Registration) icon. The 'Visualizzazione' (Visualization) section shows 'Tutti gli oggetti' (All objects) selected. The 'Spettro' (Spectrum) section shows the following settings:

- Registrazione:
- Critico max:
- Nominale max:
- Min nominale:
- Critico min:
- Posizioni decimali:

The 'Statistiche' (Statistics) section shows the following values:

- Distanza massima: 0.804269 mm
- Distanza media: 0.038469 mm
- Deviazione standard: 0.067400 mm

The bottom status bar shows the following information:

- Triangoli correnti: 261.222
- Triangoli selezionati: 0
- Pulsante centrale: Ruota | Maiusc+Pulsante destro: Zoom | Alt+Pulsante centrale: Panoramica
- 09:59 27/12/2015

# Care 4 as reference (best accuracy) vs Care 1

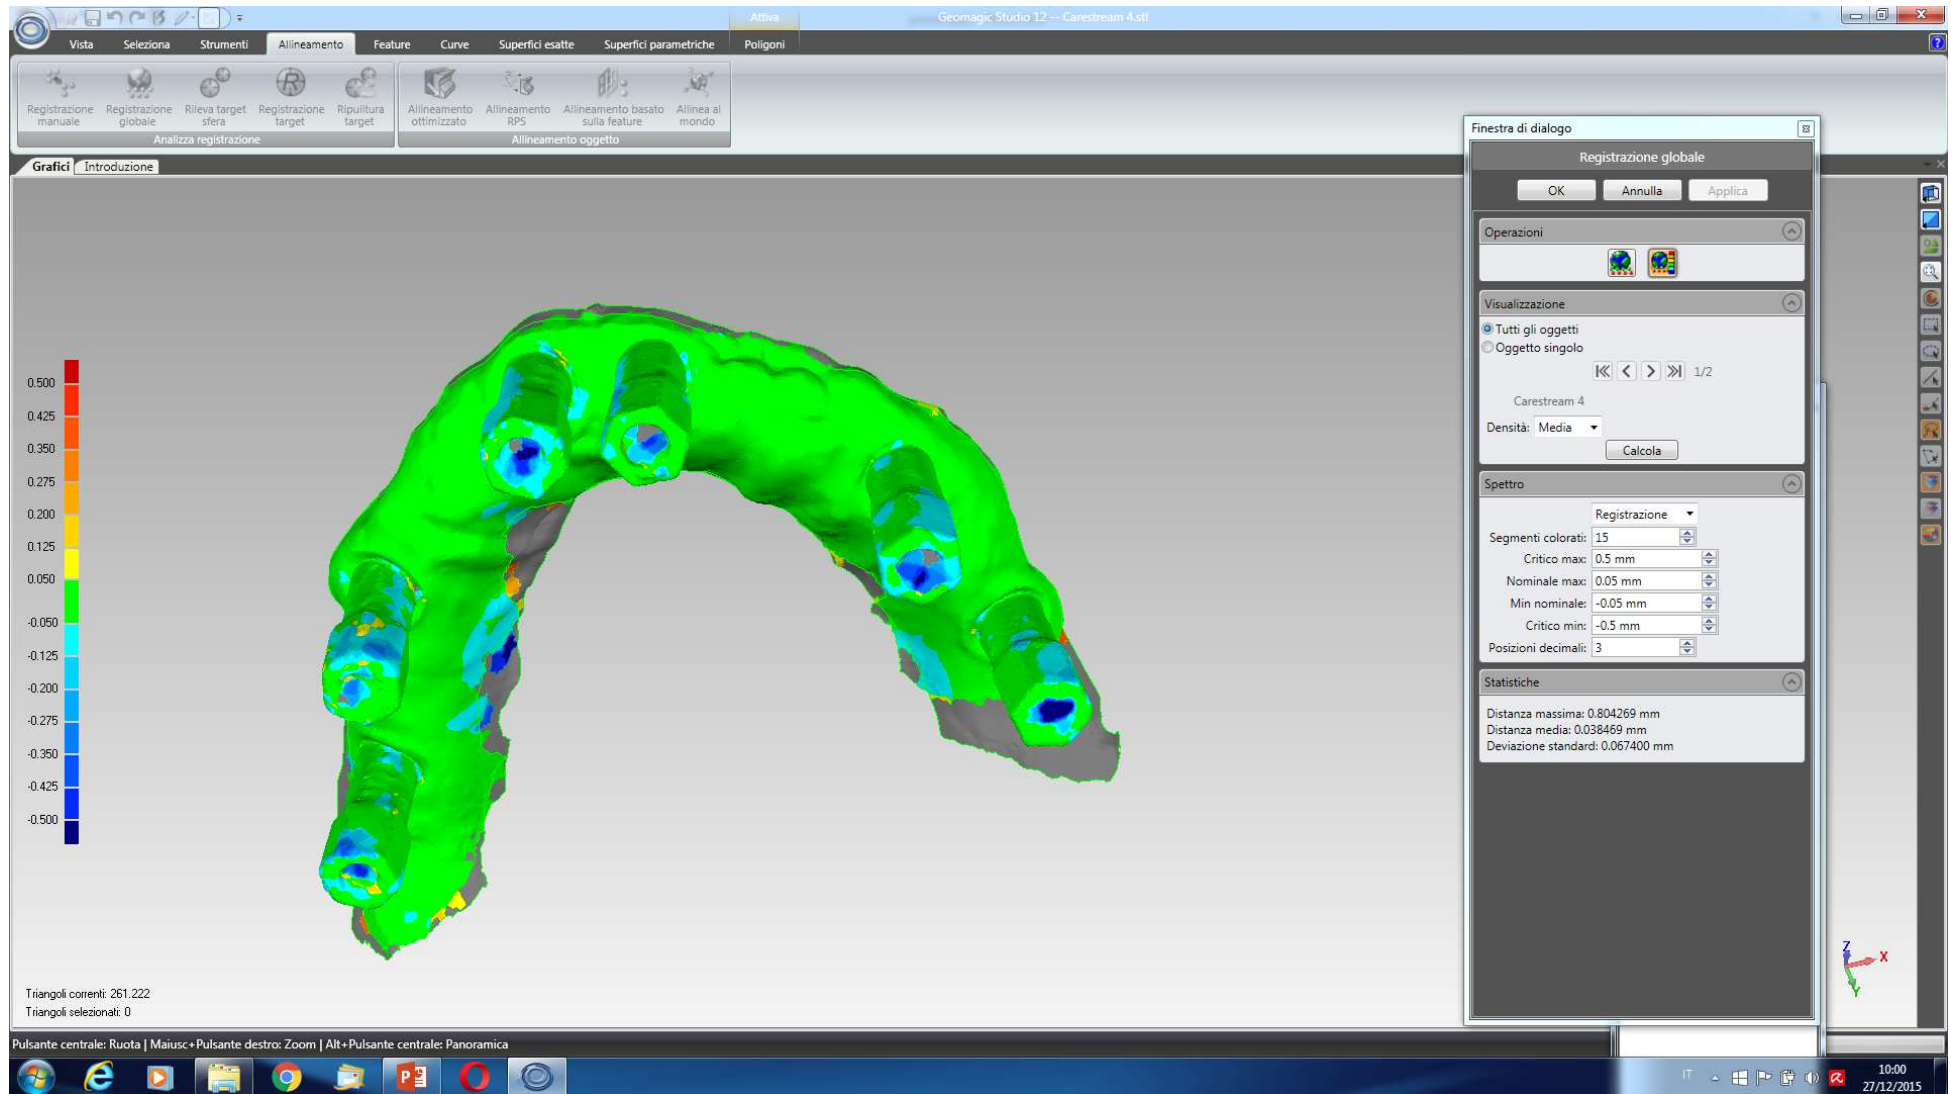

# Care 4 as reference (best accuracy) vs Care 1

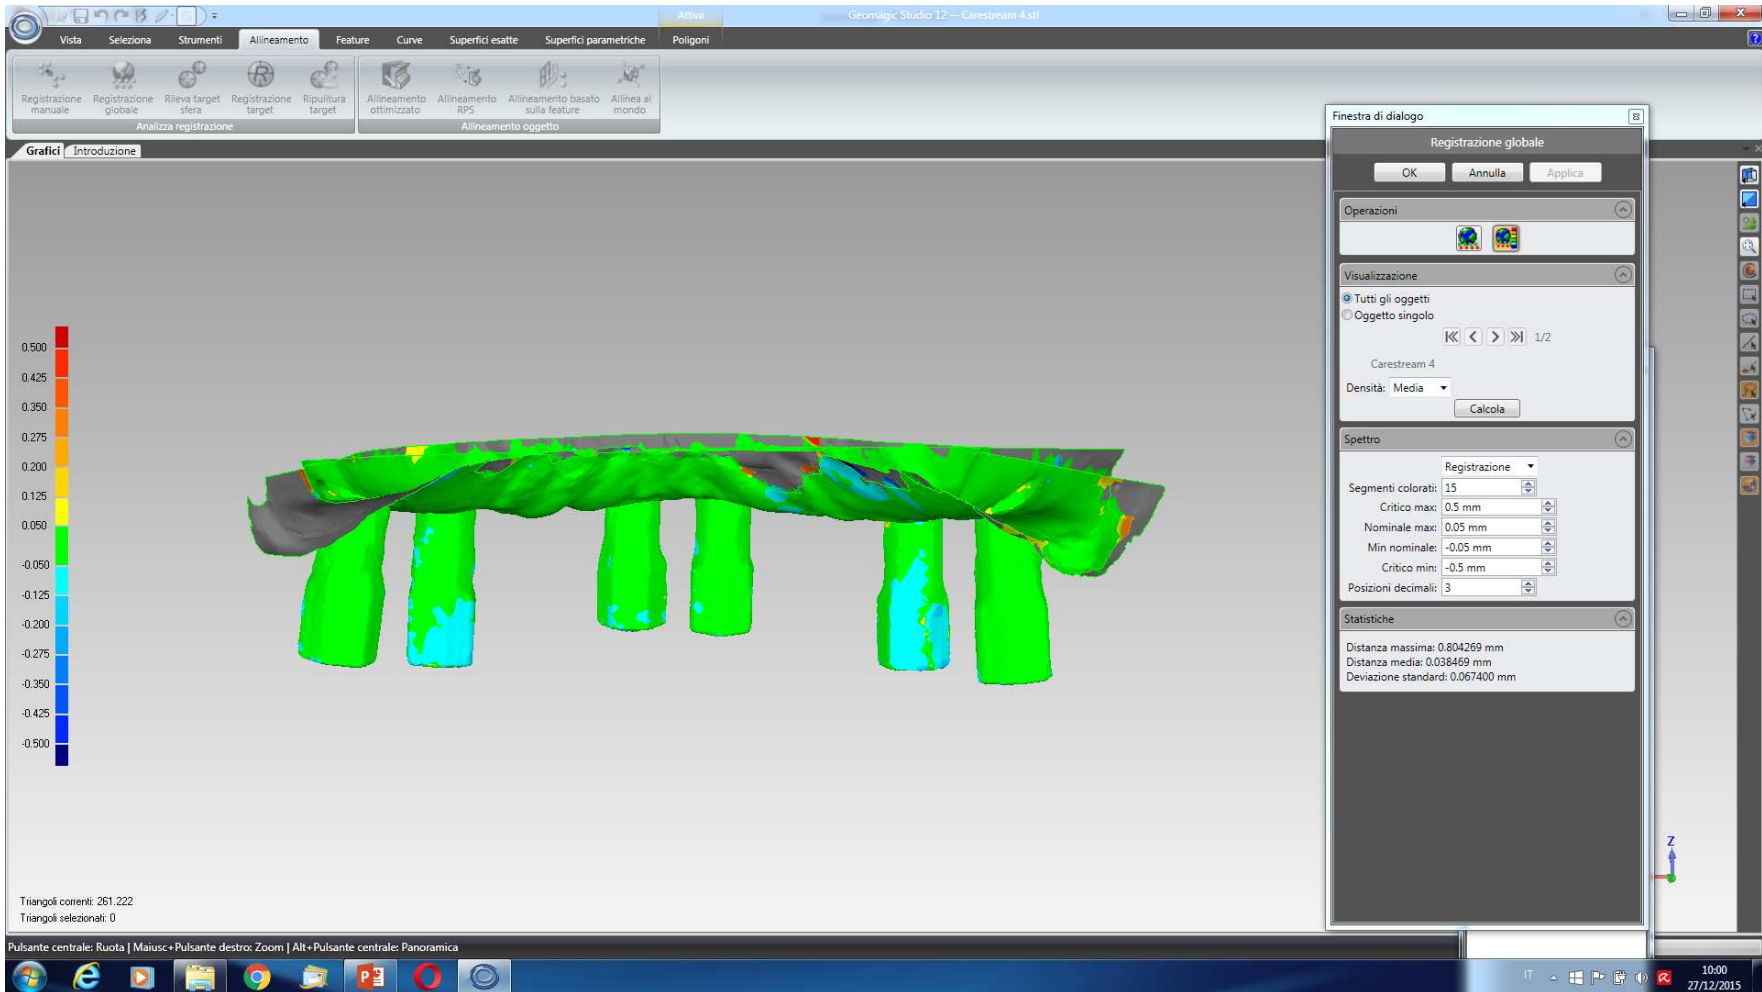



## Care 4 as reference (best accuracy) vs Care 2

The screenshot displays the Geomagic Studio 12 interface with the following components:

- Toolbar:** Includes icons for registration (manuale, globale, target), alignment (ottimizzato, RPS, basato sulla feature, al mondo, oggetto), and other tools.
- 3D Viewport:** Shows a curved, arch-like object with a color-coded registration error map. A vertical color scale on the left indicates error values from -0.500 (dark blue) to 0.500 (dark red).
- Registration Statistics (Spettro):**

| Parametro          | Valore   |
|--------------------|----------|
| Segmenti colorati  | 15       |
| Critico max        | 0.5 mm   |
| Nominale max       | 0.05 mm  |
| Min nominale       | -0.05 mm |
| Critico min        | -0.5 mm  |
| Posizioni decimali | 3        |
- Statistiche:**

|                     |             |
|---------------------|-------------|
| Distanza massima    | 0.808802 mm |
| Distanza media      | 0.063105 mm |
| Deviazione standard | 0.104509 mm |
- Footer:** Pulsante centrale: Ruota | Maiusc+Pulsante destro: Zoom | Alt+Pulsante centrale: Panoramica

## Care 4 as reference (best accuracy) vs Care 2

The screenshot displays the Geomagic Studio 12 interface with the 'Allineamento' (Alignment) menu active. The main workspace shows a 3D model of a mechanical part with a color-coded registration error map. The error scale ranges from -0.500 mm (blue) to 0.500 mm (red). The model shows a top flange and four vertical pillars. A dialog box on the right shows registration statistics: Distanza massima: 0.808802 mm, Distanza media: 0.063105 mm, Deviazione standard: 0.104509 mm.

Triangoli correnti: 262.384  
Triangoli selezionati: 0

Pulsante centrale: Ruota | Maiusc+Pulsante destro: Zoom | Alt+Pulsante centrale: Panoramica

## Care 4 as reference (best accuracy) vs Care 2

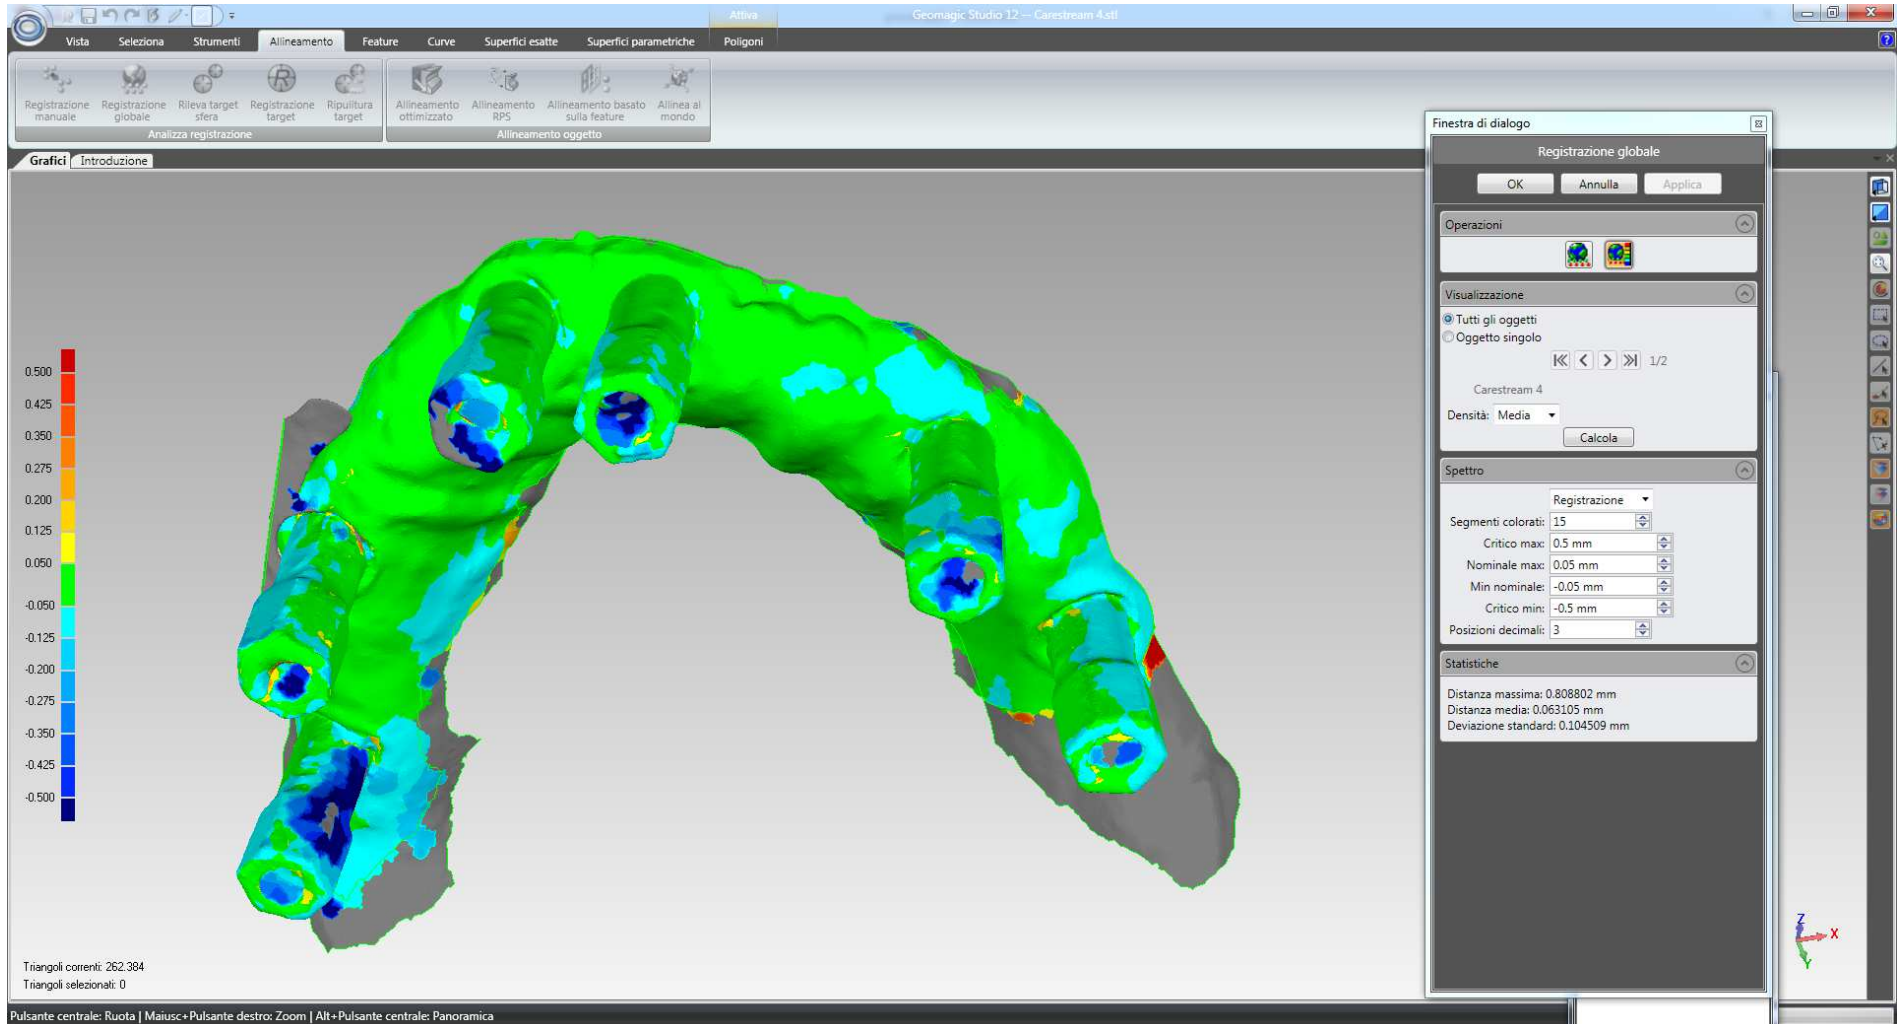

## Care 4 as reference (best accuracy) vs Care 2

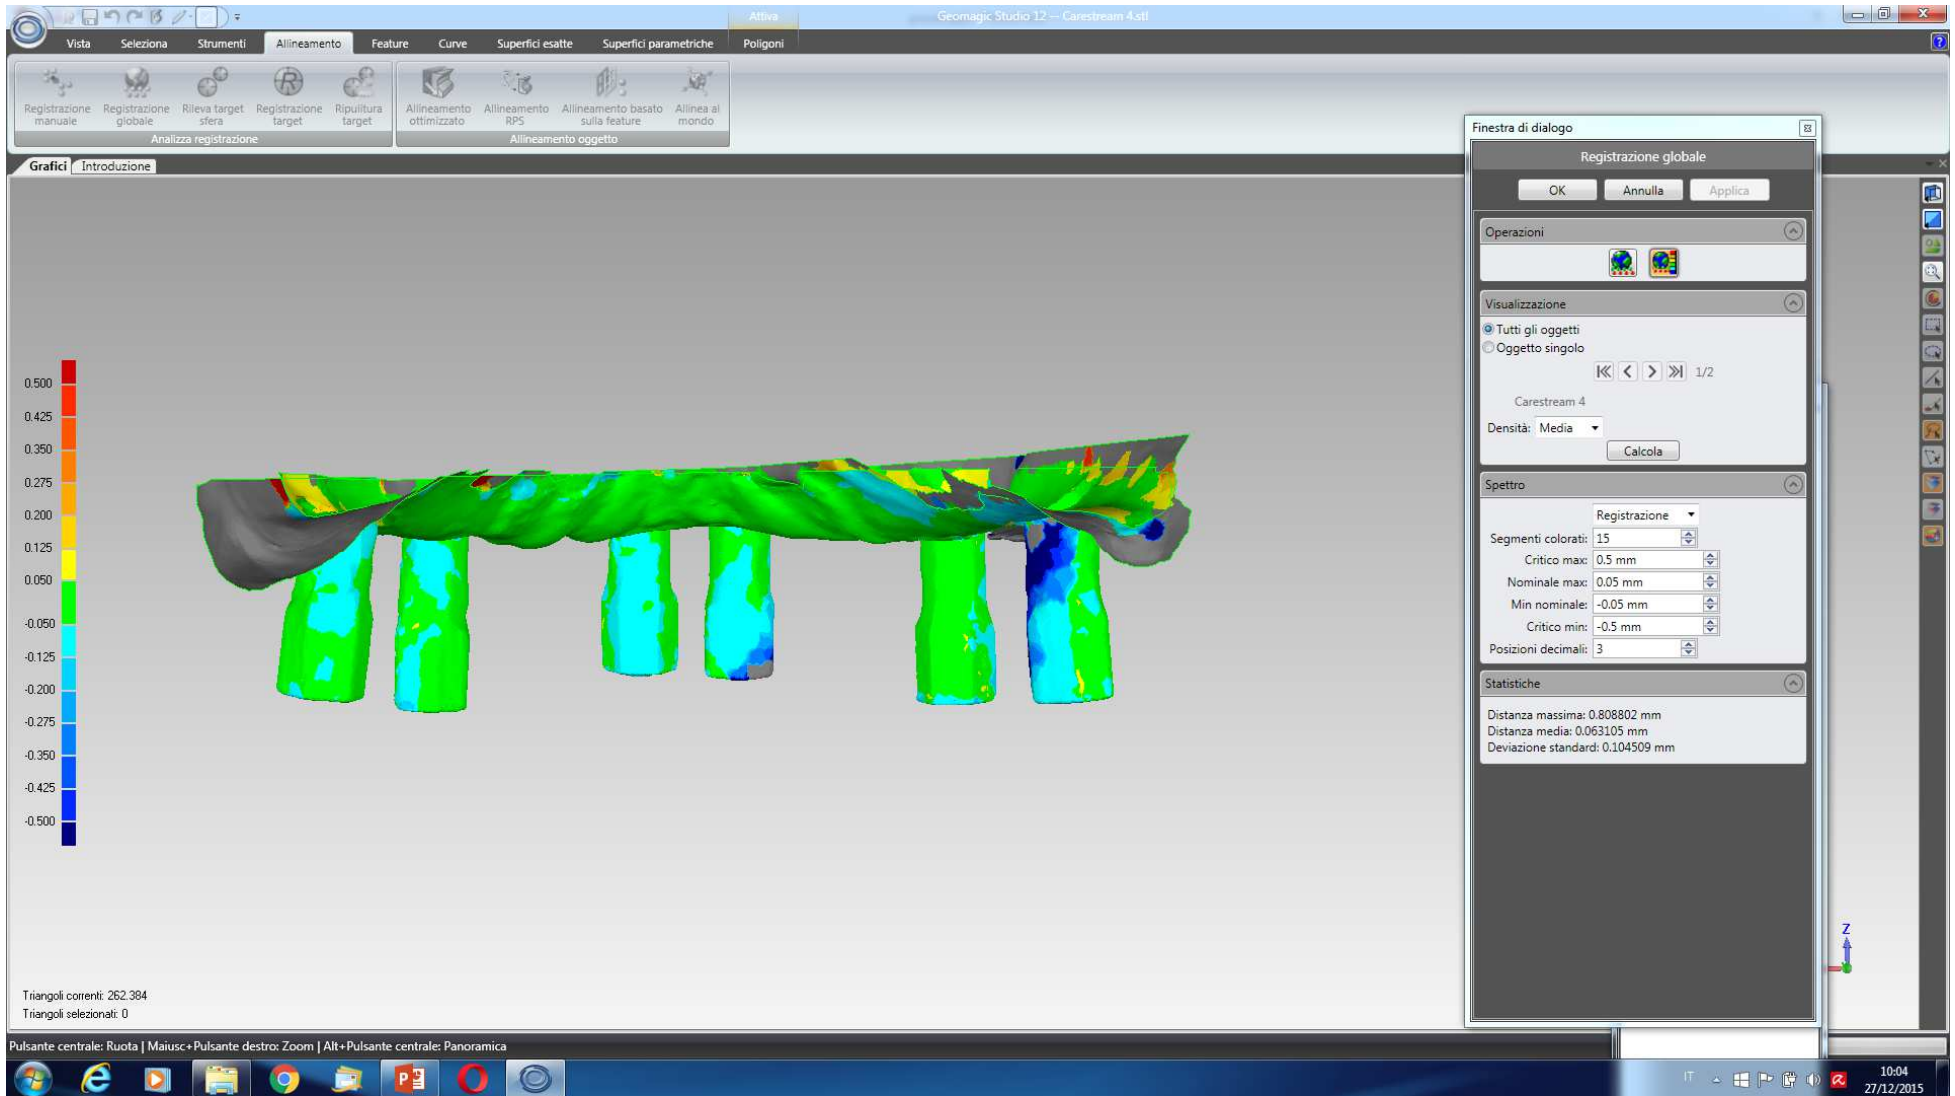

## Care 4 as reference (best accuracy) vs Care 3

The screenshot displays the Geomagic Studio 12 interface. The main window shows a 3D model of a curved object with a color-coded deviation map. The color scale on the left ranges from -0.500 (dark blue) to 0.500 (dark red). The model is primarily green, indicating low deviation, with some blue and red areas. A vertical color scale on the left ranges from -0.500 to 0.500.

The dialog box on the right, titled "Finestra di dialogo", shows the "Registrazione globale" settings. The "Operazioni" section includes icons for registration. The "Visualizzazione" section shows "Tutti gli oggetti" selected. The "Spettro" section shows "Registrazione" selected, with "Segmenti colorati" set to 15. The "Statistiche" section shows the following values:

| Statistiche          | Valore      |
|----------------------|-------------|
| Distanza massima:    | 0.813491 mm |
| Distanza media:      | 0.055333 mm |
| Deviazione standard: | 0.087343 mm |

At the bottom left, the status bar indicates: "Triangoli correnti: 255 313" and "Triangoli selezionati: 0". The bottom of the window contains the keyboard shortcuts: "Pulsante centrale: Ruota | Maiusc+Pulsante destro: Zoom | Alt+Pulsante centrale: Panoramica".

## Care 4 as reference (best accuracy) vs Care 3

The screenshot displays the Geomagic Studio 12 interface with the 'Allineamento' (Alignment) tab active. The main workspace shows a 3D model of a mechanical part with a color-coded registration error map. The error map ranges from -0.500 mm (blue) to 0.500 mm (red). A dialog box on the right, titled 'Finestra di dialogo' (Dialog Window), shows the 'Registrazione globale' (Global Registration) settings. The 'Operazioni' (Operations) section shows 'Registrazione globale' (Global Registration) selected. The 'Visualizzazione' (Visualization) section shows 'Tutti gli oggetti' (All objects) selected. The 'Spettro' (Spectrum) section shows 'Registrazione' (Registration) selected, with 'Segmenti colorati' (Colored segments) set to 15, 'Critico max' (Critical max) at 0.5 mm, 'Nominale max' (Nominal max) at 0.05 mm, 'Min nominale' (Min nominal) at -0.05 mm, 'Critico min' (Critical min) at -0.5 mm, and 'Posizioni decimali' (Decimal positions) set to 3. The 'Statistiche' (Statistics) section shows: Distanza massima: 0.813491 mm, Distanza media: 0.055333 mm, and Deviazione standard: 0.087343 mm. The bottom status bar shows: Pulsante centrale: Ruota | Maiusc+Pulsante destro: Zoom | Alt+Pulsante centrale: Panoramica.

Triangoli correnti: 255.313  
Triangoli selezionati: 0

Pulsante centrale: Ruota | Maiusc+Pulsante destro: Zoom | Alt+Pulsante centrale: Panoramica

## Care 4 as reference (best accuracy) vs Care 3

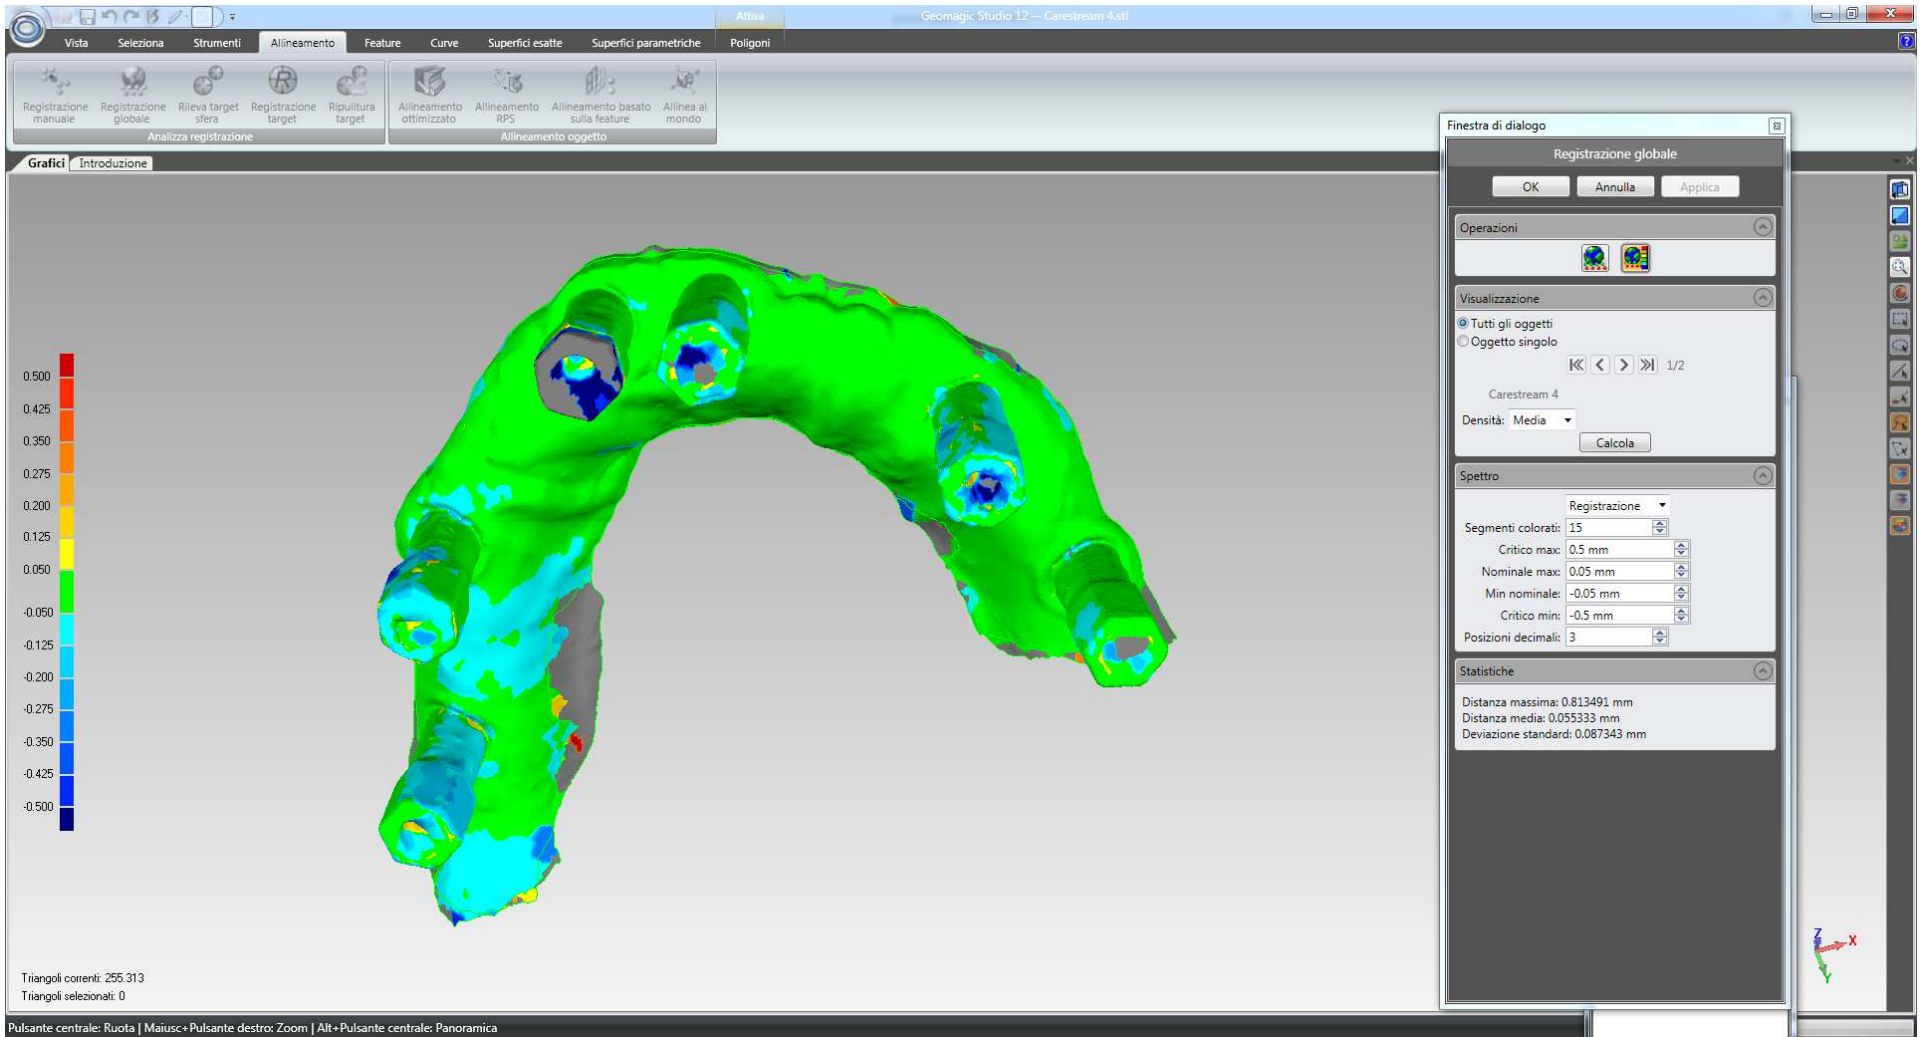

## Care 4 as reference (best accuracy) vs Care 3

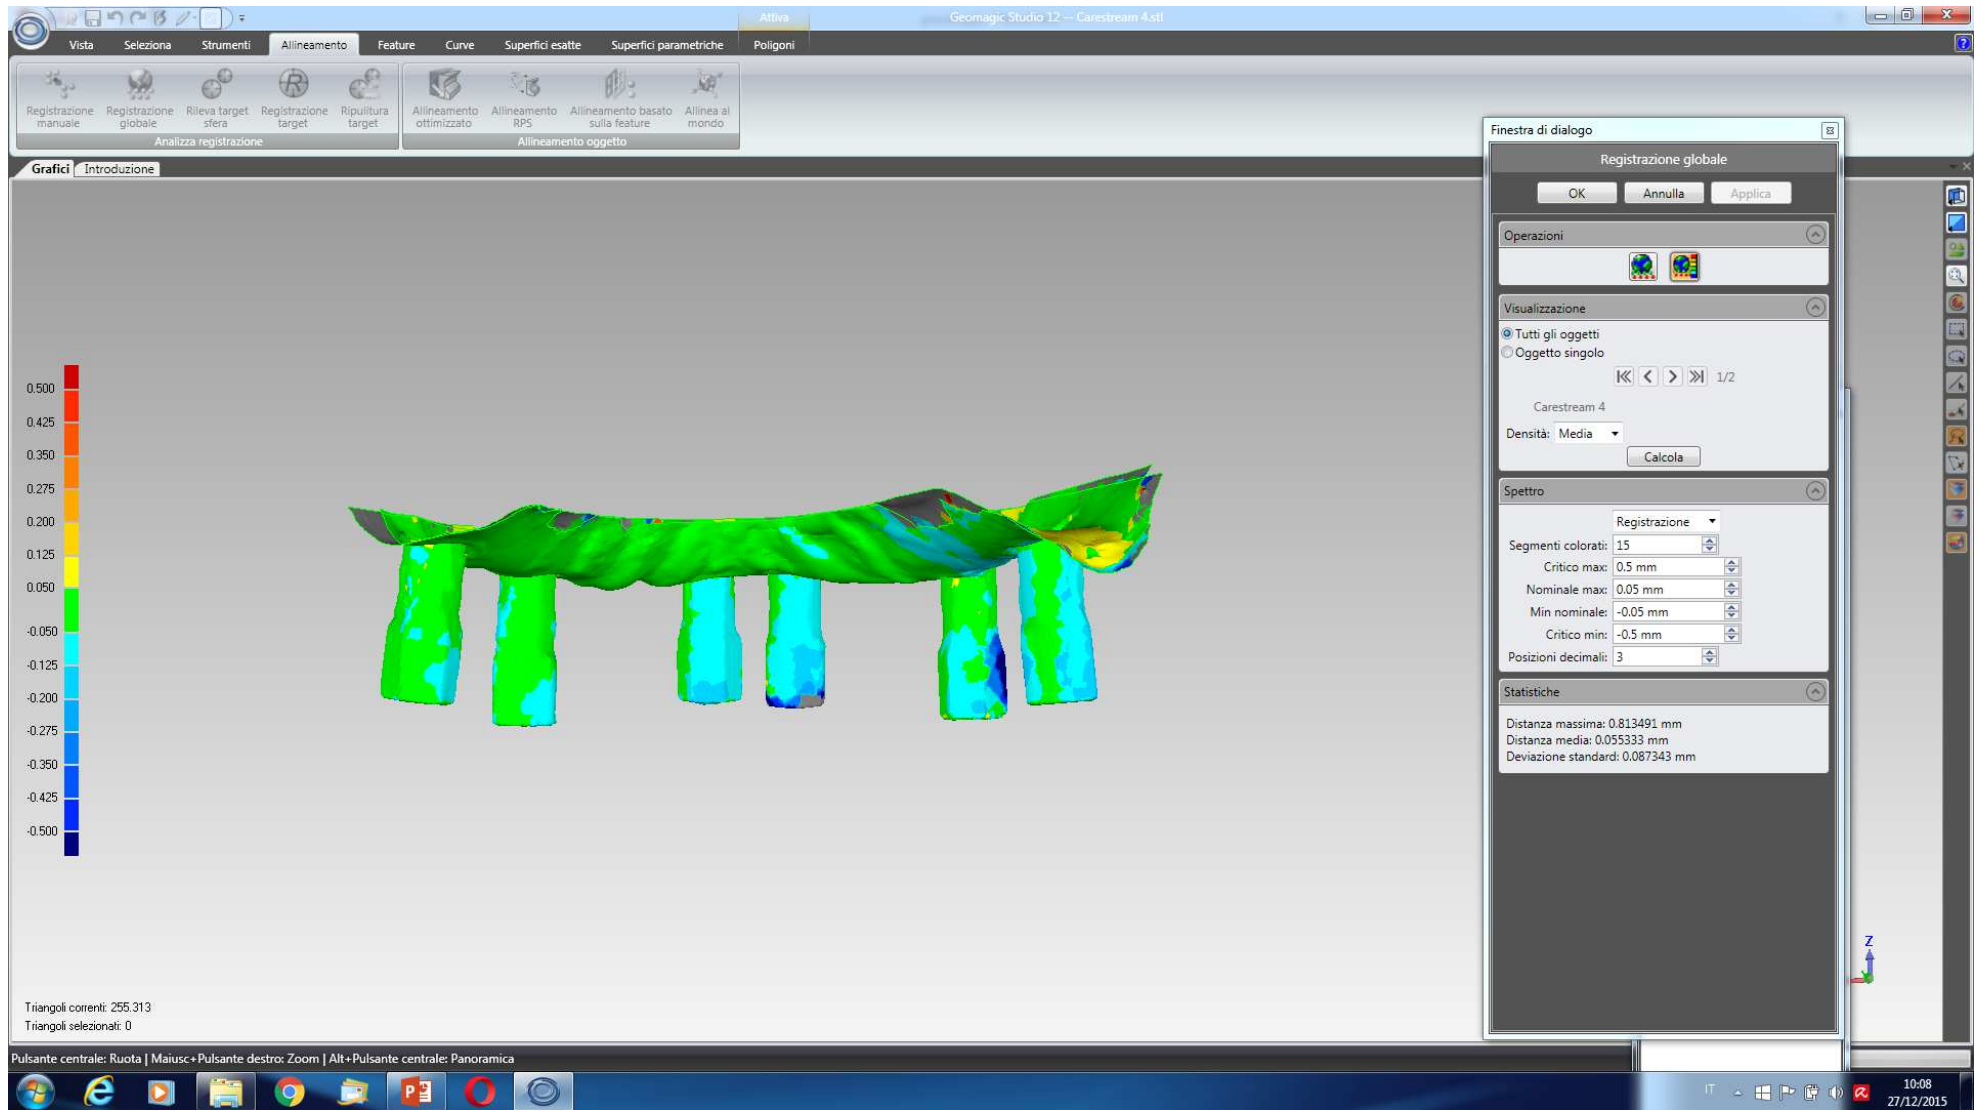



## Care 4 as reference (best accuracy) vs Care 5

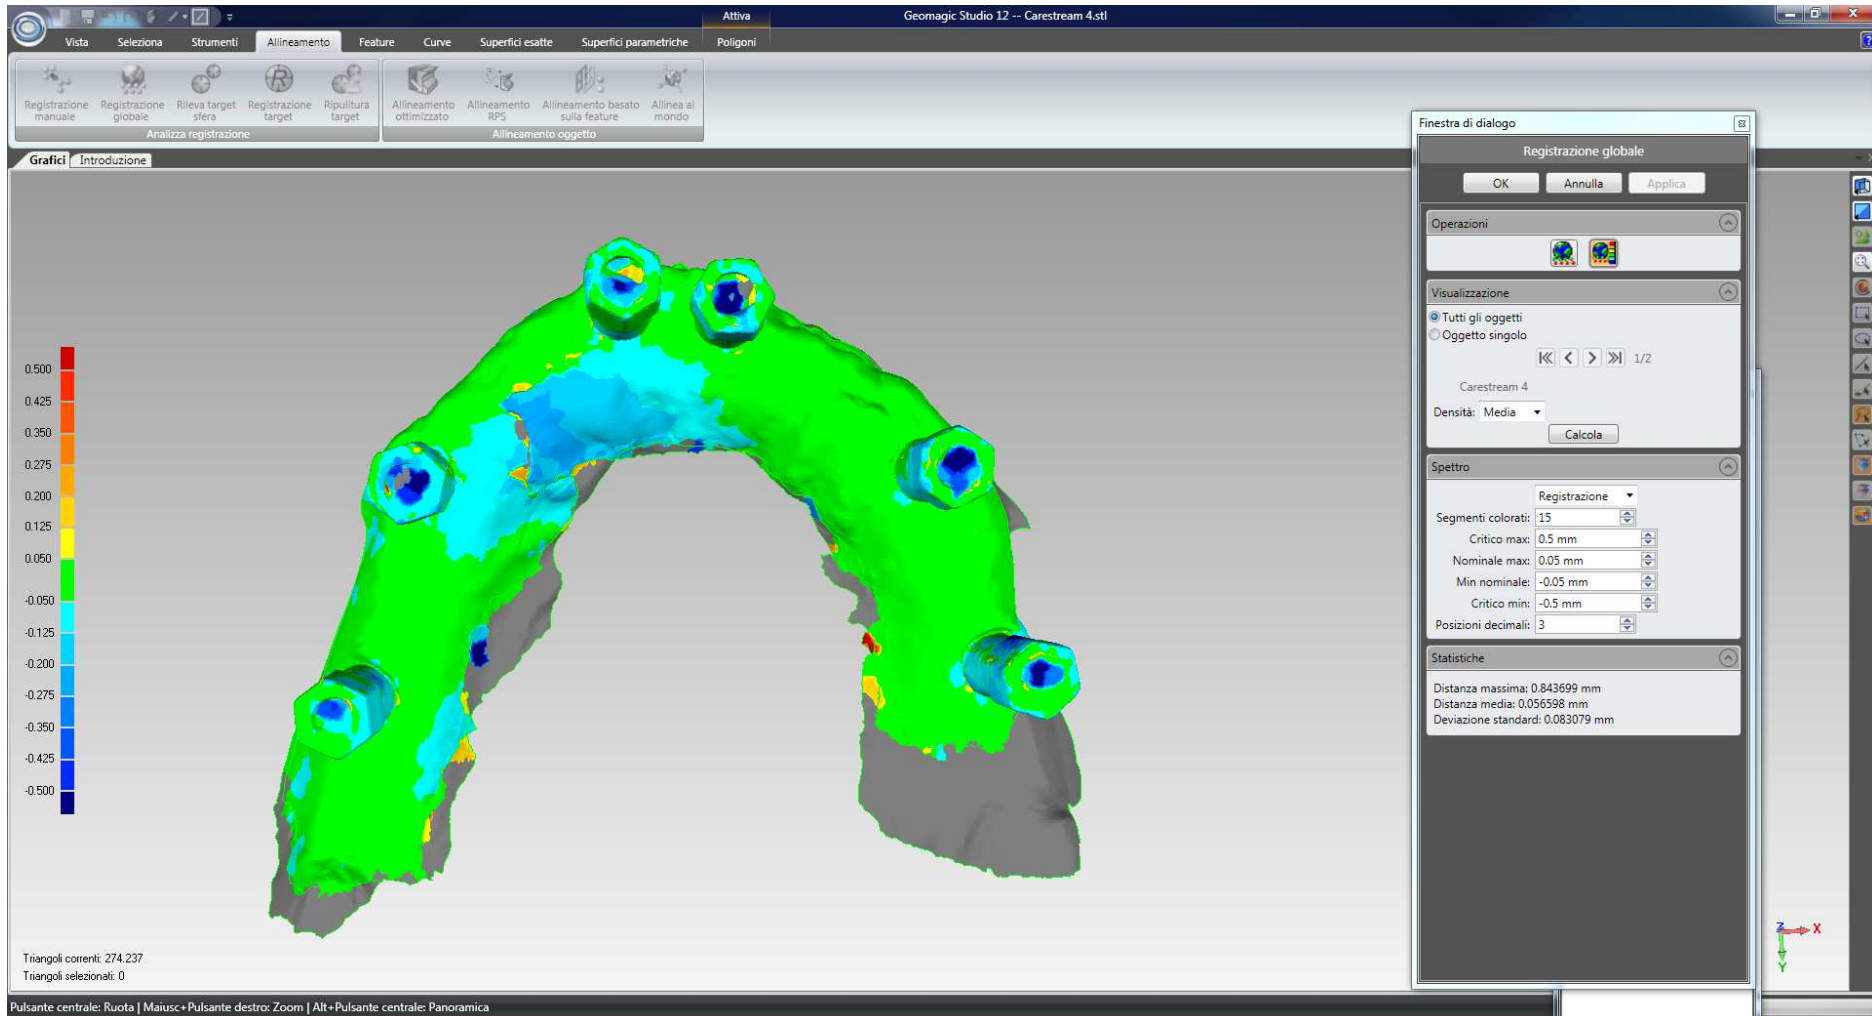

## Care 4 as reference (best accuracy) vs Care 5

The screenshot shows the Geomagic Studio 12 interface. The main window displays a 3D model of a mechanical part with a color-coded registration error map. The color scale on the left ranges from -0.500 (dark blue) to 0.500 (dark red). The model is primarily green, indicating low error, with some blue and yellow areas. A dialog box titled "Finestra di dialogo" is open on the right, showing registration statistics for "Carestream 4".

**Finestra di dialogo**

Registrazione globale

OK Annulla Applica

Operazioni

Visualizzazione

Tutti gli oggetti  
 Oggetto singolo

Navigation icons: Home, Previous, Next, End

Carestream 4

Densità: Media

Calcola

Spettro

Registrazione

Segmenti colorati: 15

Critico max: 0.5 mm

Nominale max: 0.05 mm

Min nominale: -0.05 mm

Critico min: -0.5 mm

Posizioni decimali: 3

Statistiche

Distanza massima: 0.843699 mm  
Distanza media: 0.056598 mm  
Deviazione standard: 0.083079 mm

Triangoli correnti: 274.237  
Triangoli selezionati: 0

Pulsante centrale: Ruota | Maiusc.+Pulsante destro: Zoom | Alt+Pulsante centrale: Panoramica

10:12  
27/12/2015

## Care 4 as reference (best accuracy) vs Care 5

Geomagic Studio 12 — Carestream A.stl

Vista Selezione Strumenti Allineamento Feature Curve Superfici esatte Superfici parametriche Poligoni

Registrazione manuale Registrazione globale Rileva target sfera Registrazione target Ripulitura target Allineamento ottimizzato Allineamento RPS Allineamento basato sulla feature Allinea al mondo

Analizza registrazione Allineamento oggetto

Grafici Introduzione

0.500  
0.425  
0.350  
0.275  
0.200  
0.125  
0.050  
-0.050  
-0.125  
-0.200  
-0.275  
-0.350  
-0.425  
-0.500

Triangoli coreniti: 274.237  
Triangoli selezionati: 0

Pulsante centrale: Ruota | Maiusc+Pulsante destro: Zoom | Alt+Pulsante centrale: Panoramica

Finestra di dialogo

Registrazione globale

OK Annulla Applica

Operazioni

Visualizzazione

Tutti gli oggetti  
 Oggetto singolo

1/2

Carestream 4

Densità: Media

Calcola

Spettro

Registrazione

Segmenti colorati: 15

Critico max: 0.5 mm

Nominale max: 0.05 mm

Min nominale: -0.05 mm

Critico min: -0.5 mm

Posizioni decimali: 3

Statistiche

Distanza massima: 0.843699 mm  
Distanza media: 0.056598 mm  
Deviazione standard: 0.083079 mm

10:12  
27/12/2015

## Care 4 as reference (best accuracy) vs Care 5

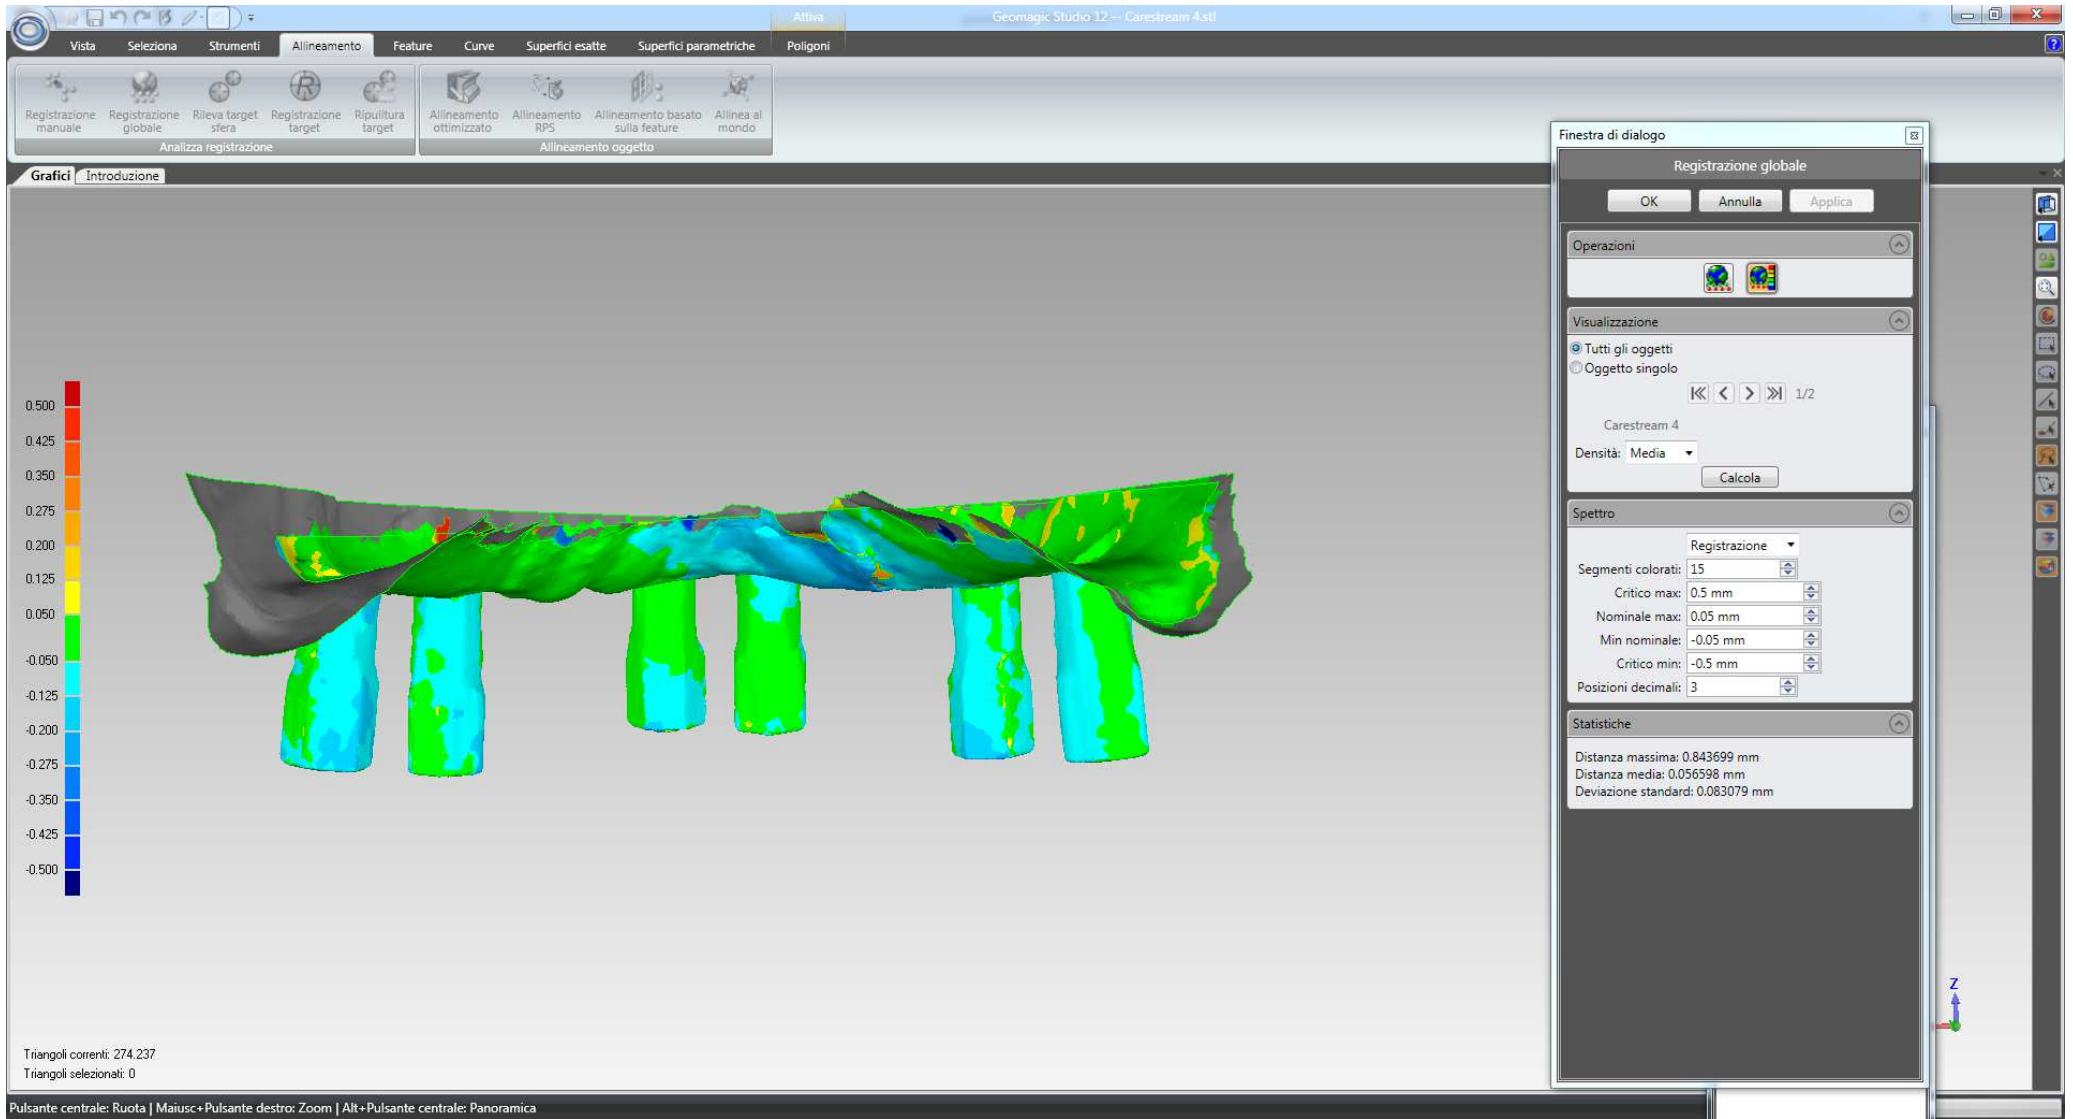

## Care 2 vs Care 3

The screenshot displays the Geomagic Studio 12 interface for a dental arch model. The main window shows a 3D model with a color-coded registration map. A vertical color scale on the left ranges from -0.500 (dark blue) to 0.500 (dark red), with green representing 0.000. The model is primarily green, indicating good registration, with some blue and red areas. The registration map shows several circular markers on the arch.

The software interface includes a menu bar with options like Vista, Selezione, Strumenti, Allineamento, Feature, Curve, Superfici esatte, Superfici parametriche, and Poligoni. Below the menu bar is a toolbar with icons for various registration and alignment tools.

The 'Finestra di dialogo' (Dialog Box) is open, showing the 'Registrazione globale' (Global Registration) settings. The 'Operazioni' (Operations) section has two icons. The 'Visualizzazione' (Visualization) section has radio buttons for 'Tutti gli oggetti' (selected) and 'Oggetto singolo'. The 'Carestream 2' model is selected, and the 'Densità' (Density) is set to 'Media'. The 'Calcola' (Calculate) button is visible.

The 'Spettro' (Spectrum) section shows the following settings:

- Registrazione (dropdown)
- Segmenti colorati: 15
- Critico max: 0.5 mm
- Nominale max: 0.05 mm
- Min nominale: -0.05 mm
- Critico min: -0.5 mm
- Posizioni decimali: 3

The 'Statistiche' (Statistics) section shows the following values:

- Distanza massima: 0.818570 mm
- Distanza media: 0.064297 mm
- Deviazione standard: 0.099432 mm

At the bottom left, the status bar shows: Triangoli correnti: 254.543, Triangoli selezionati: 0. At the bottom center, the keyboard shortcuts are: Pulsante centrale: Ruota | Maiusc+Pulsante destro: Zoom | Alt+Pulsante centrale: Panoramica. At the bottom right, there is a 3D coordinate system icon with X, Y, and Z axes.

## Care 2 vs Care 3

The screenshot displays the Geomagic Studio 12 interface. The main window shows a 3D model of a mechanical part with a color-coded surface deviation map. A vertical color scale on the left ranges from -0.500 (dark blue) to 0.500 (dark red). The software interface includes a menu bar with options like Vista, Selezione, Strumenti, Allineamento, Feature, Curve, Superfici esatte, Superfici parametriche, and Poligoni. A toolbar below the menu bar contains various registration and alignment tools. The 'Finestra di dialogo' (Dialog Box) is open on the right, titled 'Registrazione globale'. It contains the following sections:

- Operazioni:** Includes icons for registration and alignment.
- Visualizzazione:** Includes radio buttons for 'Tutti gli oggetti' (selected) and 'Oggetto singolo'. Navigation buttons (left, right, home, end) and a '1/2' indicator are present. A dropdown menu shows 'Carestream 2' and a 'Densità: Media' dropdown with a 'Calcola' button.
- Spettro:** Includes a 'Registrazione' dropdown menu, 'Segmenti colorati: 15', 'Critico max: 0.5 mm', 'Nominale max: 0.05 mm', 'Min nominale: -0.05 mm', 'Critico min: -0.5 mm', and 'Posizioni decimali: 3'.
- Statistiche:** Displays 'Distanza massima: 0.818570 mm', 'Distanza media: 0.064297 mm', and 'Deviazione standard: 0.099432 mm'.

At the bottom left, the status bar shows 'Triangoli conenti: 254.543' and 'Triangoli selezionati: 0'. At the bottom center, the keyboard shortcuts are listed: 'Pulsante centrale: Ruota | Maiusc+Pulsante destro: Zoom | Alt+Pulsante centrale: Panoramica'. A 3D coordinate system (X, Y, Z) is visible in the bottom right corner.

# Care 2 vs Care 3

**Geomagic Studio 12 – Carestream 2.stl**

**Finestra di dialogo**

**Registrazione globale**

OK Annulla Applica

**Operazioni**

**Visualizzazione**

Tutti gli oggetti  
 Oggetto singolo

« « > >> 1/2

Carestream 2

Densità: Media

Calcola

**Spettro**

Registrazione

Segmenti colorati: 15

Critico max: 0.5 mm

Nominale max: 0.05 mm

Min nominale: -0.05 mm

Critico min: -0.5 mm

Posizioni decimali: 3

**Statistiche**

Distanza massima: 0.818570 mm  
Distanza media: 0.064297 mm  
Deviazione standard: 0.099432 mm

Triangoli correnti: 254.543  
Triangoli selezionati: 0

Pulsante centrale: Ruota | Maiusc+Pulsante destro: Zoom | Alt+Pulsante centrale: Panoramica

## Care 2 vs Care 3

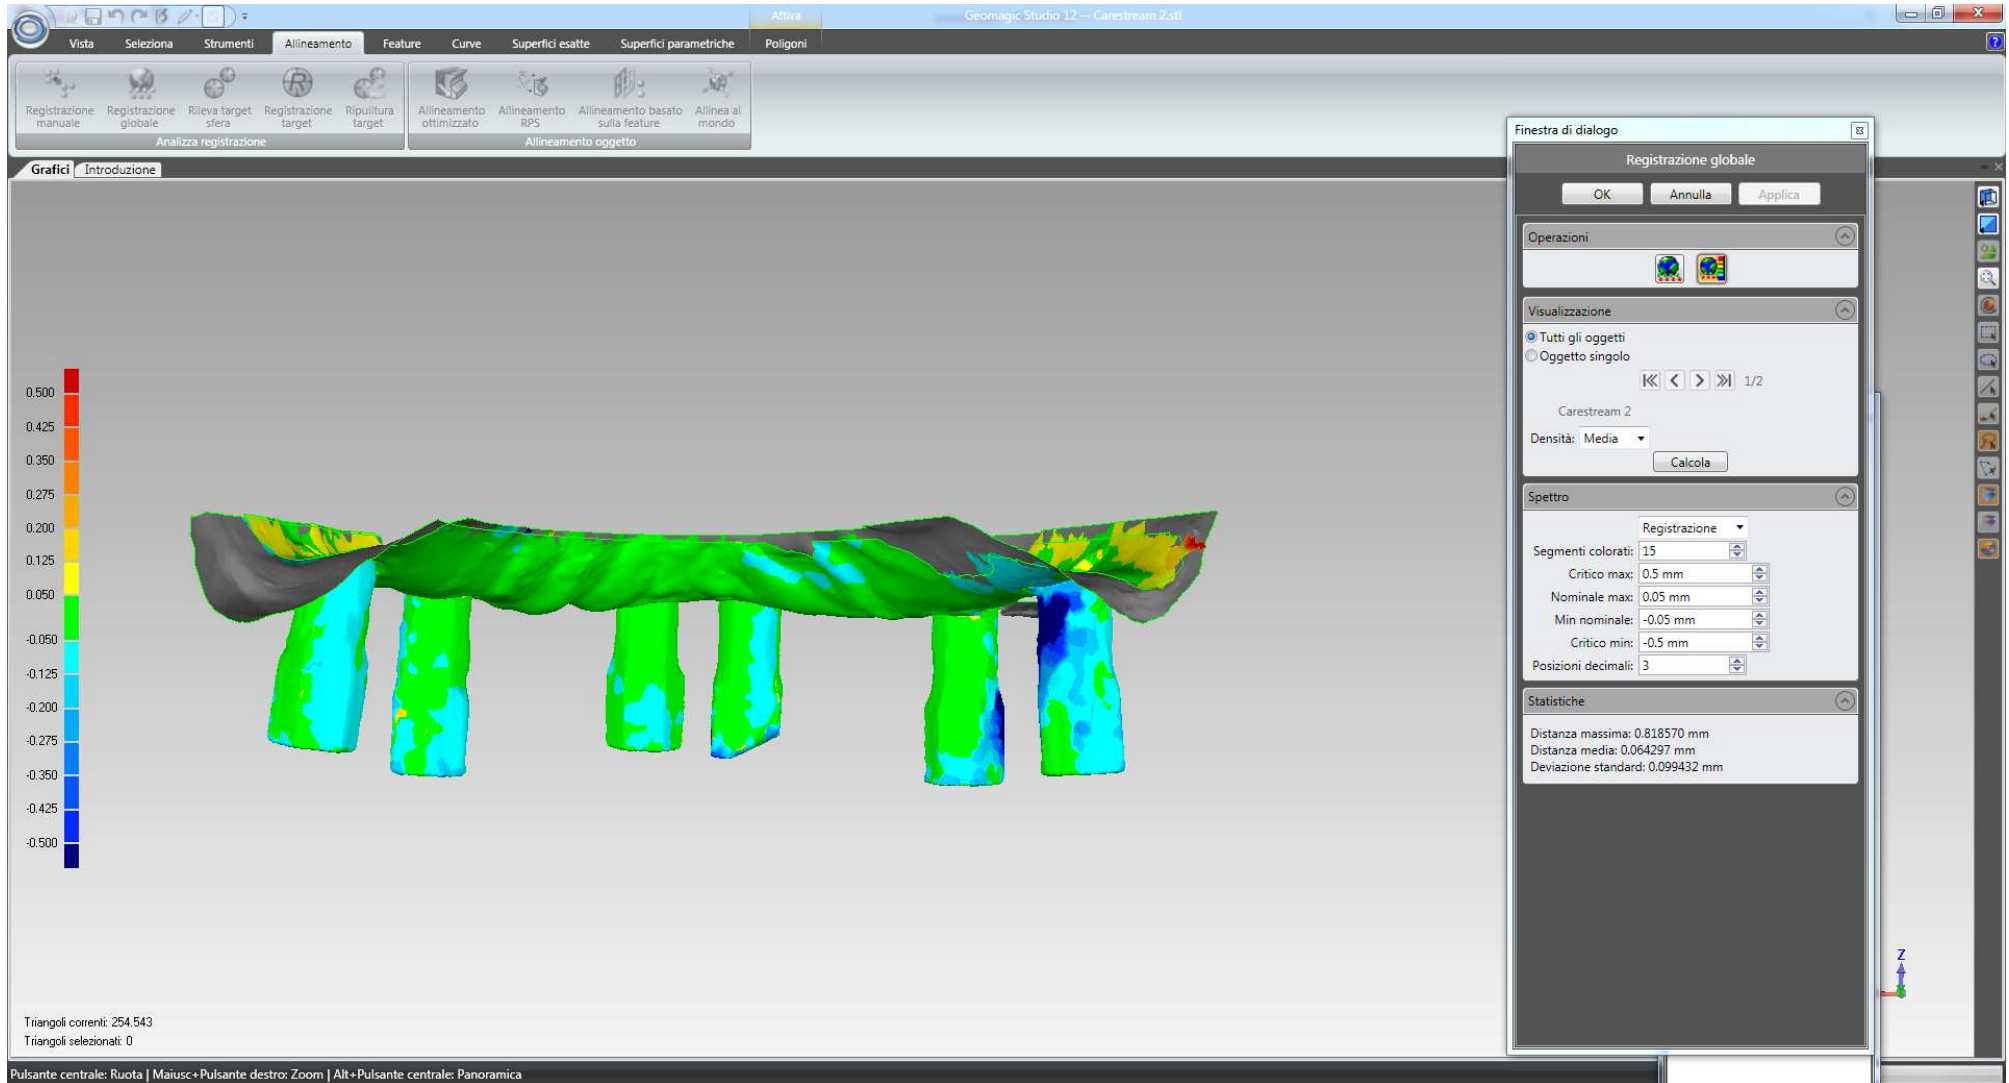



General precision of Carestream scanner in the totally edentulous

|                  | Mean distance | SD    | Maximum distance |
|------------------|---------------|-------|------------------|
| Care 4 vs Care 1 | 0.038         | 0.067 | 0.804            |
| Care 4 vs Care 2 | 0.063         | 0.104 | 0.808            |
| Care 4 vs Care 3 | 0.055         | 0.087 | 0.813            |
| Care 4 vs Care 5 | 0.056         | 0.083 | 0.843            |
| Care 2 vs Care 3 | 0.064         | 0.099 | 0.818            |

**Overall Care general precision: 0.055 (0.010)**

# Plane 5 vs Plane 1

Geomagic Studio 12 -- Planscan 5.stl

Vista Selezione Strumenti Allineamento Feature Curve Superfici esatte Superfici parametriche Poligoni

Registrazione manuale Registrazione globale Rileva target sfera Registrazione target Ripulitura target Allineamento ottimizzato Allineamento RPS Allineamento basato sulla feature Allinea al mondo

Analizza registrazione

Grafici Introduzione

Finestra di dialogo

Registrazione globale

OK Annulla Applica

Operazioni

Visualizzazione

Tutti gli oggetti  
 Oggetto singolo

Planscan 5

Densità: Media

Calcola

Spettro

Registrazione

Segmenti colorati: 15

Critico max: 0.5 mm

Nominale max: 0.05 mm

Min nominale: -0.05 mm

Critico min: -0.5 mm

Posizioni decimali: 3

Statistiche

Distanza massima: 0.926049 mm  
Distanza media: 0.179636 mm  
Deviazione standard: 0.172728 mm

Triangoli corenti: 566.086  
Triangoli selezionati: 0

Pulsante centrale: Ruota | Maiusc+Pulsante destro: Zoom | Alt+Pulsante centrale: Panoramica

# Plane 5 vs Plane 1

The screenshot displays the Geomagic Studio 12 interface. The main 3D view shows a mechanical part with a color-coded surface deviation map. A vertical color scale on the left ranges from -0.500 (dark blue) to 0.500 (dark red). The part is primarily blue and cyan, with some green and yellow areas. The software interface includes a menu bar with options like 'Vista', 'Selezione', 'Strumenti', 'Allineamento', 'Feature', 'Curve', 'Superfici esatte', 'Superfici parametriche', and 'Poligoni'. A toolbar below the menu bar contains various registration and alignment tools. The 'Finestra di dialogo' (Dialog Window) on the right is titled 'Registrazione globale' and contains the following sections:

- Operazioni:** Includes icons for registration and alignment.
- Visualizzazione:** Includes radio buttons for 'Tutti gli oggetti' (selected) and 'Oggetto singolo'. Navigation arrows and a '1/2' indicator are present. The 'Densità' is set to 'Media'.
- Spettro:** Includes a 'Registrazione' dropdown, 'Segmenti colorati' set to 15, and fields for 'Critico max: 0.5 mm', 'Nominale max: 0.05 mm', 'Min nominale: -0.05 mm', 'Critico min: -0.5 mm', and 'Posizioni decimali: 3'.
- Statistiche:** Displays 'Distanza massima: 0.926049 mm', 'Distanza media: 0.179636 mm', and 'Deviazione standard: 0.172728 mm'.

At the bottom left of the 3D view, the text reads: 'Triangoli correnti: 566.086' and 'Triangoli selezionati: 0'. The Windows taskbar at the bottom shows the system tray with the time '14:41' and date '02/01/2016'.

# Plane 5 vs Plane 1

Geomagic Studio 12 -- Planscan 5.stl

Vista Selezione Strumenti Allineamento Feature Curve Superfici esatte Superfici parametriche Poligoni

Registrazione manuale Registrazione globale Rileva target sfera Registrazione target Ripulitura target  
Analizza registrazione

Allineamento ottimizzato Allineamento RPS Allineamento basato sulla feature Allinea al mondo  
Allineamento oggetto

Grafici | Introduzione

0.500  
0.425  
0.350  
0.275  
0.200  
0.125  
0.050  
-0.050  
-0.125  
-0.200  
-0.275  
-0.350  
-0.425  
-0.500

Triangoli correnti: 566.086  
Triangoli selezionati: 0

Pulsante centrale: Ruota | Maiusc+Pulsante destro: Zoom | Alt+Pulsante centrale: Panoramica

Finestra di dialogo

Registrazione globale

OK Annulla Applica

Operazioni

Visualizzazione

Tutti gli oggetti  
 Oggetto singolo

PlanScan 5

Densità: Media

Calcola

Spettro

Registrazione

Segmenti colorati: 15

Critico max: 0.5 mm

Nominale max: 0.05 mm

Min nominale: -0.05 mm

Critico min: -0.5 mm

Posizioni decimali: 3

Statistiche

Distanza massima: 0.926049 mm  
Distanza media: 0.179636 mm  
Deviazione standard: 0.172728 mm

14:42  
02/01/2016

# Plane 5 vs Plane 1

The screenshot displays the Geomagic Studio 12 interface. The main window shows a 3D model of a hand with a color-coded registration error map. A vertical color scale on the left indicates error values from -0.500 mm (blue) to 0.500 mm (red). The 'Finestra di dialogo' (dialog box) is open on the right, showing registration statistics for 'Planscan 5'.

**Finestra di dialogo: Registrazione globale**

Operazioni: [Icona]

Visualizzazione:  
 Tutti gli oggetti  
 Oggetto singolo  
Planscan 5  
Densità: Media  
Calcola

Spettro:  
Registrazione  
Segmenti colorati: 15  
Critico max: 0.5 mm  
Nominale max: 0.05 mm  
Min nominale: -0.05 mm  
Critico min: -0.5 mm  
Posizioni decimali: 3

Statistiche:  
Distanza massima: 0.926049 mm  
Distanza media: 0.179636 mm  
Deviazione standard: 0.172728 mm

Triangoli correnti: 566.086  
Triangoli selezionati: 0

Pulsante centrale: Ruota | Maiusc+Pulsante destro: Zoom | Alt+Pulsante centrale: Panoramica

14:42  
02/01/2016

## Plane 5 vs Plane 2

Geomagic Studio 12 -- Planscan 5.stl

Vista Selezione Strumenti Allineamento Feature Curve Superfici esatte Superfici parametriche Poligoni

Registrazione manuale Registrazione globale Rileva target sfera Registrazione target Ripulitura target

Analizza registrazione

Allineamento ottimizzato Allineamento RPS Allineamento basato sulla feature Allinea al mondo

Allineamento oggetto

Grafici Introduzione

0.500  
0.425  
0.350  
0.275  
0.200  
0.125  
0.050  
-0.050  
-0.125  
-0.200  
-0.275  
-0.350  
-0.425  
-0.500

Triangoli correnti: 547.588  
Triangoli selezionati: 0

Pulsante centrale: Ruota | Maiusc+Pulsante destro: Zoom | Alt+Pulsante centrale: Panoramica

Finestra di dialogo

Registrazione globale

OK Annulla Applica

Operazioni

Visualizzazione

Tutti gli oggetti  
 Oggetto singolo

Planscan 5

Densità: Media

Calcola

Spettro

Registrazione

Segmenti colorati: 15

Critico max: 0.5 mm

Nominale max: 0.05 mm

Min nominale: -0.05 mm

Critico min: -0.5 mm

Posizioni decimali: 3

Statistiche

Distanza massima: 0.927004 mm  
Distanza media: 0.216675 mm  
Deviazione standard: 0.183753 mm

## Plane 5 vs Plane 2

The screenshot displays the Geomagic Studio 12 interface. The main window shows a 3D model of a table with a color-coded surface deviation map. The color scale ranges from -0.500 (dark blue) to 0.500 (dark red). The table has four legs and a flat top surface. The deviation map shows the difference between Plane 5 and Plane 2.

The software interface includes a menu bar with options: Vista, Selezione, Strumenti, Allineamento, Feature, Curve, Superfici esatte, Superfici parametriche, and Poligoni. Below the menu bar is a toolbar with various registration and alignment tools.

The "Finestra di dialogo" (Dialog Box) is open, showing the "Registrazione globale" (Global Registration) settings. The "Operazioni" (Operations) section shows two icons. The "Visualizzazione" (Visualization) section has "Tutti gli oggetti" (All objects) selected. The "Spettro" (Spectrum) section shows the following settings:

- Registrazione: [Dropdown]
- Segmenti colorati: 15
- Critico max: 0.5 mm
- Nominale max: 0.05 mm
- Min nominale: -0.05 mm
- Critico min: -0.5 mm
- Posizioni decimali: 3

The "Statistiche" (Statistics) section shows the following data:

- Distanza massima: 0.927004 mm
- Distanza media: 0.216675 mm
- Deviazione standard: 0.183753 mm

At the bottom left, the status bar indicates: Triangoli corenti: 547.588, Triangoli selezionati: 0. At the bottom center, the status bar indicates: Pulsante centrale: Ruota | Maiusc+Pulsante destro: Zoom | Alt+Pulsante centrale: Panoramica.

# Plane 5 vs Plane 2

Geomagic Studio 12 -- Planscan 5.stl

Attiva

Vista Selezione Strumenti Allineamento Feature Curve Superfici esatte Superfici parametriche Poligoni

Registrazione manuale Registrazione globale Rileva target sfera Registrazione target Ripulitura target

Analizza registrazione

Allineamento ottimizzato Allineamento RPS Allineamento basato sulla feature Allinea al mondo

Allineamento oggetto

Grafici Introduzione

0.500  
0.425  
0.350  
0.275  
0.200  
0.125  
0.050  
-0.050  
-0.125  
-0.200  
-0.275  
-0.350  
-0.425  
-0.500

Triangoli correnti: 547.588  
Triangoli selezionati: 0

Pulsante centrale: Ruota | Maiusc+Pulsante destro: Zoom | Alt+Pulsante centrale: Panoramica

Finestra di dialogo

Registrazione globale

OK Annulla Applica

Operazioni

Visualizzazione

Tutti gli oggetti  
 Oggetto singolo

Planscan 5

Densità: Media

Calcola

Spettro

Registrazione

Segmenti colorati: 15

Critico max: 0.5 mm

Nominale max: 0.05 mm

Min nominale: -0.05 mm

Critico min: -0.5 mm

Posizioni decimali: 3

Statistiche

Distanza massima: 0.927004 mm  
Distanza media: 0.216675 mm  
Deviazione standard: 0.183753 mm



## Plane 5 vs Plane 2

Geomagic Studio 12 -- Planscan 5.stl

Vista Selezione Strumenti Allineamento Feature Curve Superfici esatte Superfici parametriche Poligoni

Registrazione manuale Registrazione globale Rileva target sfera Registrazione target Ripulitura target

Analizza registrazione

Allineamento ottimizzato Allineamento RPS Allineamento basato sulla feature Allinea al mondo

Allineamento oggetto

Grafici Introduzione

0.500  
0.425  
0.350  
0.275  
0.200  
0.125  
0.050  
-0.050  
-0.125  
-0.200  
-0.275  
-0.350  
-0.425  
-0.500

Triangoli correnti: 547.588  
Triangoli selezionati: 0

Pulsante centrale: Ruota | Maiusc+Pulsante destro: Zoom | Alt+Pulsante centrale: Panoramica

Finestra di dialogo

Registrazione globale

OK Annulla Applica

Operazioni

Visualizzazione

Tutti gli oggetti  
 Oggetto singolo

Planscan 5

Densità: Media

Calcola

Spettro

Registrazione

Segmenti colorati: 15

Critico max: 0.5 mm

Nominale max: 0.05 mm

Min nominale: -0.05 mm

Critico min: -0.5 mm

Posizioni decimali: 3

Statistiche

Distanza massima: 0.927004 mm  
Distanza media: 0.216675 mm  
Deviazione standard: 0.183753 mm

# Plane 5 vs Plane 3

The screenshot displays the Geomagic Studio 12 interface. The main window shows a 3D model of a curved mechanical part with a color-coded registration error map. The error scale ranges from -0.500 to 0.500 mm. A dialog box on the right displays registration statistics:

| Registrazione globale            |  |
|----------------------------------|--|
| OK Annulla Applica               |  |
| Operazioni                       |  |
| Visualizzazione                  |  |
| Tutti gli oggetti                |  |
| Planscan 5                       |  |
| Densità: Media                   |  |
| Calcola                          |  |
| Spettro                          |  |
| Registrazione                    |  |
| Segmenti colorati: 15            |  |
| Critico max: 0.5 mm              |  |
| Nominale max: 0.05 mm            |  |
| Min nominale: -0.05 mm           |  |
| Critico min: -0.5 mm             |  |
| Posizioni decimali: 3            |  |
| Statistiche                      |  |
| Distanza massima: 0.920003 mm    |  |
| Distanza media: 0.222867 mm      |  |
| Deviazione standard: 0.203002 mm |  |

Triangoli correnti: 578.668  
Triangoli selezionati: 0

Pulsante centrale: Ruota | Maiusc+Pulsante destro: Zoom | Alt+Pulsante centrale: Panoramica

IT 14:54 02/01/2016

# Plane 5 vs Plane 3

Geomagic Studio 12 -- Planscan 5.x3d

Vista Selezione Strumenti **Allineamento** Feature Curve Superfici esatte Superfici parametriche Poligoni

Registrazione manuale Registrazione globale Rileva target sfera Registrazione target Ripulitura target Analisi registrazione

Allineamento ottimizzato Allineamento RPS Allineamento basato sulla feature Allinea al mondo Allineamento oggetto

Grafici Introduzione

0.500  
0.425  
0.350  
0.275  
0.200  
0.125  
0.050  
-0.050  
-0.125  
-0.200  
-0.275  
-0.350  
-0.425  
-0.500

Triangoli correnti: 578.668  
Triangoli selezionati: 0

Pulsante centrale: Ruota | Maiusc+Pulsante destro: Zoom | Alt+Pulsante centrale: Panoramica

Finestra di dialogo

Registrazione globale

OK Annulla Applica

Operazioni

Visualizzazione

Tutti gli oggetti  
 Oggetto singolo

PlanScan 5

Densità: Media

Calcola

Spettro

Registrazione

Segmenti colorati: 15

Critico max: 0.5 mm

Nominale max: 0.05 mm

Min nominale: -0.05 mm

Critico min: -0.5 mm

Posizioni decimali: 3

Statistiche

Distanza massima: 0.920003 mm  
Distanza media: 0.222867 mm  
Deviazione standard: 0.203002 mm

# Plane 5 vs Plane 3

The screenshot displays the Geomagic Studio 12 interface. The main window shows a 3D model of a mechanical part with a color-coded registration error map. The error scale ranges from -0.500 mm (dark blue) to 0.500 mm (dark red). A dialog box titled "Registrazione globale" is open on the right, displaying registration statistics:

| Registrazione globale            |          |
|----------------------------------|----------|
| OK Annulla Applica               |          |
| Operazioni                       |          |
| Visualizzazione                  |          |
| Tutti gli oggetti                |          |
| Oggetto singolo                  |          |
| Planscan 5                       |          |
| Densità: Media                   |          |
| Calcola                          |          |
| Spettro                          |          |
| Registrazione                    |          |
| Segmenti colorati:               | 15       |
| Critico max:                     | 0.5 mm   |
| Nominale max:                    | 0.05 mm  |
| Min nominale:                    | -0.05 mm |
| Critico min:                     | -0.5 mm  |
| Posizioni decimali:              | 3        |
| Statistiche                      |          |
| Distanza massima: 0.920003 mm    |          |
| Distanza media: 0.222867 mm      |          |
| Deviazione standard: 0.203002 mm |          |

Triangoli correnti: 578.668  
Triangoli selezionati: 0

Pulsante centrale: Ruota | Maiusc+Pulsante destro: Zoom | Alt+Pulsante centrale: Panoramica

# Plane 5 vs Plane 3

**Finestra di dialogo**

**Registrazione globale**

OK Annulla Applica

**Operazioni**

**Visualizzazione**

Tutti gli oggetti  
 Oggetto singolo

PlanSCAN 5  
Densità: Media

**Spettro**

Registrazione

Segmenti colorati: 15  
Critico max: 0.5 mm  
Nominale max: 0.05 mm  
Min nominale: -0.05 mm  
Critico min: -0.5 mm  
Posizioni decimali: 3

**Statistiche**

Distanza massima: 0.920003 mm  
Distanza media: 0.222867 mm  
Deviazione standard: 0.203002 mm

Triangoli corenti: 578.668  
Triangoli selezionati: 0

Pulsante centrale: Ruota | Maiusc+Pulsante destro: Zoom | Alt+Pulsante centrale: Panoramica

# Plane 5 vs Plane 4

Geomagic Studio 12 -- Planscan 5.stl

Vista Selezione Strumenti **Allineamento** Feature Curve Superfici esatte Superfici parametriche Poligoni

Registrazione manuale Registrazione globale Rileva target sfera Registrazione target Ripulitura target

Analizza registrazione

Allineamento ottimizzato Allineamento RPS Allineamento basato sulla feature Allinea al mondo

Allineamento oggetto

Grafici Introduzione

0.500  
0.425  
0.350  
0.275  
0.200  
0.125  
0.050  
-0.050  
-0.125  
-0.200  
-0.275  
-0.350  
-0.425  
-0.500

Triangoli correnti: 585.069  
Triangoli selezionati: 0

Pulsante centrale: Ruota | Maiusc+Pulsante destro: Zoom | Alt+Pulsante centrale: Panoramica

Finestra di dialogo

Registrazione globale

OK Annulla Applica

Operazioni

Visualizzazione

Tutti gli oggetti  
 Oggetto singolo

PlanSCAN 5

Densità: Media

Calcola

Spettro

Registrazione

Segmenti colorati: 15

Critico max: 0.5 mm

Nominale max: 0.05 mm

Min nominale: -0.05 mm

Critico min: -0.5 mm

Posizioni decimali: 3

Statistiche

Distanza massima: 0.924077 mm  
Distanza media: 0.180414 mm  
Deviazione standard: 0.178867 mm

# Plane 5 vs Plane 4

Geomagic Studio 12 -- Planscan 5.stl

Vista Selezione Strumenti Allineamento Feature Curve Superfici esatte Superfici parametriche Poligoni

Registrazione manuale Registrazione globale Rileva target sfera Registrazione target Ripulitura target

Analizza registrazione

Allineamento ottimizzato Allineamento RPS Allineamento basato sulla feature Allinea al mondo

Allineamento oggetto

Grafici Introduzione

0.500  
0.425  
0.350  
0.275  
0.200  
0.125  
0.050  
-0.050  
-0.125  
-0.200  
-0.275  
-0.350  
-0.425  
-0.500

Triangoli correnti: 585.063  
Triangoli selezionati: 0

Pulsante centrale: Ruota | Maiusc+Pulsante destro: Zoom | Alt+Pulsante centrale: Panoramica

Finestra di dialogo

Registrazione globale

OK Annulla Applica

Operazioni

Visualizzazione

Tutti gli oggetti  
Oggetto singolo

Planscan 5

Densità: Media

Calcola

Spettro

Registrazione

Segmenti colorati: 15

Critico max: 0.5 mm

Nominale max: 0.05 mm

Min nominale: -0.05 mm

Critico min: -0.5 mm

Posizioni decimali: 3

Statistiche

Distanza massima: 0.924077 mm  
Distanza media: 0.180414 mm  
Deviazione standard: 0.178867 mm

# Plane 5 vs Plane 4

Geomagic Studio 12 -- Planscan 5.stl

Vista Selezione Strumenti Allineamento Feature Curve Superfici esatte Superfici parametriche Poligoni

Registrazione manuale Registrazione globale Rileva target sfera Registrazione target Ripulitura target

Analizza registrazione

Allineamento ottimizzato Allineamento RPS Allineamento basato sulla feature Allinea al mondo

Allineamento oggetto

Grafici Introduzione

0.500  
0.425  
0.350  
0.275  
0.200  
0.125  
0.050  
-0.050  
-0.125  
-0.200  
-0.275  
-0.350  
-0.425  
-0.500

Triangoli correnti: 595.069  
Triangoli selezionati: 0

Pulsante centrale: Ruota | Maiusc+Pulsante destro: Zoom | Alt+Pulsante centrale: Panoramica

Finestra di dialogo

Registrazione globale

OK Annulla Applica

Operazioni

Visualizzazione

Tutti gli oggetti  
 Oggetto singolo

Planscan 5

Densità: Media

Calcola

Spettro

Registrazione

Segmenti colorati: 15

Critico max: 0.5 mm

Nominale max: 0.05 mm

Min nominale: -0.05 mm

Critico min: -0.5 mm

Posizioni decimali: 3

Statistiche

Distanza massima: 0.924077 mm  
Distanza media: 0.180414 mm  
Deviazione standard: 0.178867 mm



# Plane 5 vs Plane 4

Geomagic Studio 12 -- Planscan 5

Vista Selezione Strumenti Allineamento Feature Curve Superfici esatte Superfici parametriche Poligoni

Registrazione manuale Registrazione globale Rileva target sfera Registrazione target Ripulitura target Allineamento ottimizzato Allineamento RPS Allineamento basato sulla feature Allinea al mondo

Analizza registrazione Allineamento oggetto

Grafici Introduzione

0.500  
0.425  
0.350  
0.275  
0.200  
0.125  
0.050  
-0.050  
-0.125  
-0.200  
-0.275  
-0.350  
-0.425  
-0.500

Triangoli correnti: 585.063  
Triangoli selezionati: 0

Pulsante centrale: Ruota | Maiusc+Pulsante destro: Zoom | Alt+Pulsante centrale: Panoramica

Finestra di dialogo

Registrazione globale

OK Annulla Applica

Operazioni

Visualizzazione

Tutti gli oggetti  
 Oggetto singolo

Planscan 5

Densità: Media

Calcola

Spettro

Registrazione

Segmenti colorati: 15

Critico max: 0.5 mm

Nominale max: 0.05 mm

Min nominale: -0.05 mm

Critico min: -0.5 mm

Posizioni decimali: 3

Statistiche

Distanza massima: 0.924077 mm  
Distanza media: 0.180414 mm  
Deviazione standard: 0.178867 mm

# Plane 1 vs Plane 4

0.500  
0.425  
0.350  
0.275  
0.200  
0.125  
0.050  
-0.050  
-0.125  
-0.200  
-0.275  
-0.350  
-0.425  
-0.500

Finestra di dialogo  
Registrazione globale  
OK Annulla Applica  
Operazioni  
Visualizzazione  
Tutti gli oggetti  
Oggetto singolo  
Planscan Ibis  
Densità: Media  
Calcola  
Spettro  
Registrazione  
Segmenti colorati: 15  
Critico max: 0.5 mm  
Nominale max: 0.05 mm  
Min nominale: -0.05 mm  
Critico min: -0.5 mm  
Posizioni decimali: 3  
Statistiche  
Distanza massima: 0.902932 mm  
Distanza media: 0.224310 mm  
Deviazione standard: 0.192536 mm

Triangoli correnti: 577.692  
Triangoli selezionati: 0

Pulsante centrale: Ruota | Maiusc+Pulsante destro: Zoom | Alt+Pulsante centrale: Panoramica

IT 15:03  
02/01/2016

# Plane 1 vs Plane 4

The screenshot displays the Geomagic Studio 12 interface. The main window shows a 3D model of a mechanical part with a color-coded surface deviation map. The color scale ranges from -0.500 (dark blue) to 0.500 (dark red). The part has a central horizontal section with four vertical supports. The deviation map shows significant variations, particularly on the vertical supports and the top surface.

The software interface includes a menu bar with options: Vista, Selezione, Strumenti, Allineamento, Feature, Curve, Superfici esatte, Superfici parametriche, Poligoni. The toolbar contains various registration and alignment tools: Registrazione manuale, Registrazione globale, Rileva target sfera, Registrazione target, Ripulitura target, Allineamento ottimizzato, Allineamento RPS, Allineamento basato sulla feature, Allinea al mondo.

The 'Finestra di dialogo' (Dialog Window) is titled 'Registrazione globale' and contains the following sections:

- Operazioni:** Includes icons for registration and alignment.
- Visualizzazione:** Includes options for 'Tutti gli oggetti' (selected) and 'Oggetto singolo'. It also shows 'Planscan 1bis' and 'Densità: Media'.
- Spettro:** Includes a dropdown for 'Registrazione', 'Segmenti colorati: 15', 'Critico max: 0.5 mm', 'Nominale max: 0.05 mm', 'Min nominale: -0.05 mm', 'Critico min: -0.5 mm', and 'Posizioni decimali: 3'.
- Statistiche:** Includes 'Distanza massima: 0.902932 mm', 'Distanza media: 0.224310 mm', and 'Deviazione standard: 0.192536 mm'.

At the bottom left, the status bar shows: Triangoli correnti: 577.692, Triangoli selezionati: 0. At the bottom center, the keyboard shortcuts are: Pulsante centrale: Ruota | Maiusc+Pulsante destro: Zoom | Alt+Pulsante centrale: Panoramica.

# Plane 1 vs Plane 4

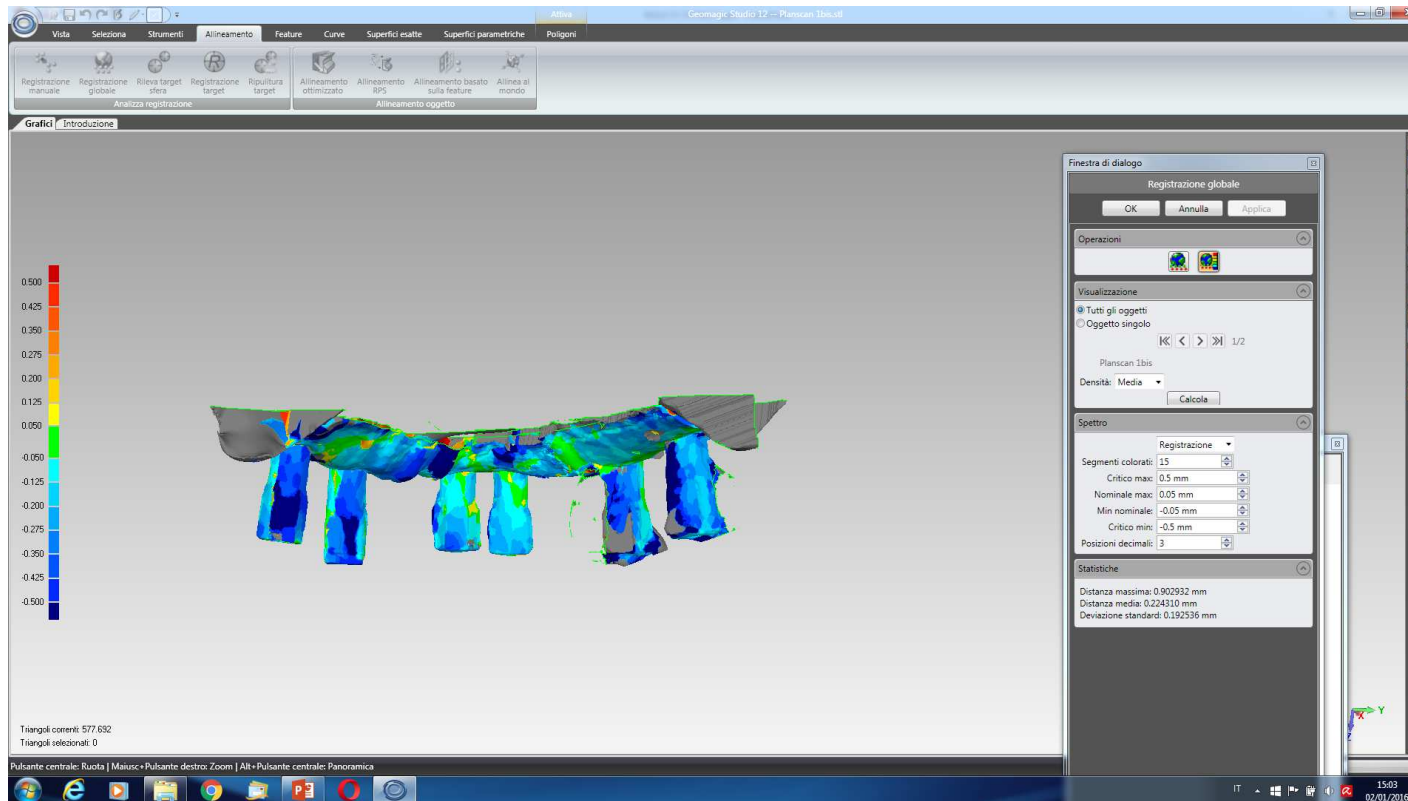

# Plane 1 vs Plane 4

The screenshot displays the Geomagic Studio 12 interface. The main window shows a 3D model of a mechanical part with a color-coded registration map. The color scale ranges from -0.500 (dark blue) to 0.500 (dark red). The registration map shows the alignment of two planes, Plane 1 and Plane 4, with the difference in distance between them. The registration map is color-coded according to the distance difference, with red indicating positive differences and blue indicating negative differences.

The 'Finestra di dialogo' (Dialog Window) is open, showing the 'Registrazione globale' (Global Registration) settings. The 'Operazioni' (Operations) section shows the registration operation. The 'Visualizzazione' (Visualization) section shows the 'Tutti gli oggetti' (All objects) option selected. The 'Spettro' (Spectrum) section shows the 'Registrazione' (Registration) operation selected, with the following settings:

- Segmenti colorati: 15
- Critico max: 0.5 mm
- Nominale max: 0.05 mm
- Min nominale: -0.05 mm
- Critico min: -0.5 mm
- Posizioni decimali: 3

The 'Statistiche' (Statistics) section shows the following values:

- Distanza massima: 0.902932 mm
- Distanza media: 0.224310 mm
- Deviazione standard: 0.192536 mm

At the bottom left, the status bar shows: Triangoli correnti: 577.692, Triangoli selezionati: 0. At the bottom center, the status bar shows: Pulsante centrale: Ruota | Maiusc+Pulsante destro: Zoom | Alt+Pulsante centrale: Panoramica.

General precision of Planmeca scanner in the totally edentulous model

|                    | Mean distance | SD    | Maximum distance |
|--------------------|---------------|-------|------------------|
| Plane 5 vs Plane 1 | 0.179         | 0.172 | 0.926            |
| Plane 5 vs Plane 2 | 0.216         | 0.183 | 0.927            |
| Plane 5 vs Plane 3 | 0.222         | 0.203 | 0.920            |
| Plane 5 vs Plane 4 | 0.180         | 0.178 | 0.924            |
| Plane 1 vs Plane 4 | 0.224         | 0.192 | 0.902            |

**Overall Plane general precision: 0.204 (0.022)**

**Overall Care general accuracy: 0.063 (0.007)**

**Overall Trios general accuracy: 0.071 (0.026)**

**Overall Mht general accuracy: 0.103 (0.026)**

**Overall Plane general accuracy: 0.253 (0.013)**

**Overall Care general precision: 0.055 (0.010)**

**Overall Trios general precision: 0.067 (0.032)**

**Overall Mht general precision: 0.112 (0.022)**

**Overall Plane general precision: 0.204 (0.022)**

**OVERALL RESULTS OF GENERAL TRUENESS AND GENERAL PRECISION  
FOR THE FOUR DIFFERENT SCANNERS  
IN THE TOTALLY EDENTULOUS MODEL**

## LOCAL TRIOS ACCURACY LINEAR MEASUREMENTS

| Misure lineari su Trios | Imetric       | Trios1 | Trios2 | Trios3 | Trios 4 | Trios 5 | Media Trios    | Errore medio lineare Trios |
|-------------------------|---------------|--------|--------|--------|---------|---------|----------------|----------------------------|
| S1-S2                   | <b>13.807</b> | 14.002 | 13.897 | 13.640 | 13.822  | 13.799  | 13.832 (0.133) | -0.025                     |
| S2-S3                   | <b>18.737</b> | 18.753 | 18.691 | 18.776 | 18.664  | 18.753  | 18.727 (0.047) | 0.01                       |
| S1-S3                   | <b>31.159</b> | 31.276 | 31.293 | 31.133 | 31.220  | 31.163  | 31.217 (0.069) | -0.058                     |
| S3-S4                   | <b>8.218</b>  | 8.159  | 8.194  | 8.043  | 8.057   | 8.160   | 8.122 (0.067)  | 0.096                      |
| S4-S5                   | <b>19.913</b> | 19.996 | 19.831 | 19.875 | 19.891  | 19.934  | 19.905 (0.062) | 0.008                      |
| S5-S6                   | <b>16.351</b> | 16.059 | 16.199 | 16.091 | 16.059  | 16.062  | 16.094 (0.060) | 0.257                      |
| S4-S6                   | <b>34.858</b> | 34.961 | 34.785 | 34.798 | 34.737  | 34.841  | 34.824 (0.084) | 0.034                      |



| Misure angolari su Netfab | Imetric | Trios 1 | Trios 2 | Trios 3 | Trios 4 | Trios 5 | Media Trios    | Errore medio |
|---------------------------|---------|---------|---------|---------|---------|---------|----------------|--------------|
| S1-S2-S3                  | 147.24° | 147.50° | 146.98° | 148.52° | 148.03° | 147.55° | 147.71° (0.58) | - 0.47°      |
| S1-S3-S5                  | 102.05° | 102.41° | 101.83° | 101.73° | 102.07° | 101.93° | 101.99° (0.26) | 0.06°        |
| S4-S5-S6                  | 149.74° | 150.37° | 149.77° | 149.36° | 149.96° | 149.70° | 149.83° (0.37) | - 0.09°      |
| S1-S3-S6                  | 85.52°  | 85.99°  | 85.16°  | 85.20°  | 85.52°  | 85.77°  | 85.52° (0.35)  | 0.00°        |

LOCAL TRIOS ACCURACY ANGOLAR MEASUREMENTS ed errore medio angolare

LOCAL ZFX ACCURACY LINEAR MEASUREMENTS

| Misure lineari su Zfx | Imetric | Zfx 1  | Zfx 2  | Zfx 3  | Zfx 4  | Zfx 5  | Media Zfx      | Errore medio lineare Zfx |
|-----------------------|---------|--------|--------|--------|--------|--------|----------------|--------------------------|
| S1-S2                 | 13.807  | 14.023 | 14.004 | 13.967 | 14.316 | 14.068 | 14.075 (0.139) | -0.268                   |
| S2-S3                 | 18.737  | 18.477 | 18.731 | 18.898 | 18.554 | 18.684 | 18.668 (0.163) | 0,069                    |
| S1-S3                 | 31.159  | 31.087 | 31.406 | 31.433 | 31.500 | 31.250 | 31.335 (0.166) | -0.176                   |
| S3-S4                 | 8.218   | 8.199  | 8.398  | 8.292  | 8.288  | 8.351  | 8.305 (0.074)  | -0.087                   |
| S4-S5                 | 19.913  | 20.178 | 20.116 | 20.196 | 19.966 | 20.022 | 20.095 (0.099) | -0.182                   |
| S5-S6                 | 16.351  | 16.320 | 16.123 | 16.385 | 16.276 | 16.057 | 16.232 (0.137) | 0.119                    |
| S4-S6                 | 34.858  | 35.312 | 35.142 | 35.498 | 35.155 | 35.124 | 35.246 (0.159) | -0.388                   |

| Misure angolari su Netfab | Imetric | Zfx 1   | Zfx 2   | Zfx 3   | Zfx 4   | Zfx 5   | Media Zfx      | Errore medio angolare |
|---------------------------|---------|---------|---------|---------|---------|---------|----------------|-----------------------|
| S1-S2-S3                  | 147.24° | 146.77° | 147.38° | 147.58° | 146.76° | 146.32° | 146.96° (0.51) | 0.28°                 |
| S1-S3-S5                  | 102.05° | 101.07° | 100.78° | 102.35° | 102.43° | 101.02° | 101.53° (0.79) | 0.52°                 |
| S4-S5-S6                  | 149.74° | 150.45° | 150.46° | 150.04° | 149.59° | 150.73° | 150.25° (0.44) | -0.51°                |
| S1-S3-S6                  | 85.52°  | 84.84°  | 84.45°  | 86.14°  | 85.90°  | 85.20°  | 85.30° (0.70)  | 0.22°                 |

LOCAL ZFX ACCURACY ANGOLAR MEASUREMENTS ed errore medio angolare

## LOCAL CARE ACCURACY LINEAR MEASUREMENTS

| Misure lineari su Care | Imetric       | Care 1 | Care 2 | Care 3 | Care 4 | Care 5 | Media Care     | Errore medio lineare Care |
|------------------------|---------------|--------|--------|--------|--------|--------|----------------|---------------------------|
| S1-S2                  | <b>13.807</b> | 13.732 | 13.884 | 13.638 | 13.893 | 14.077 | 13.844 (0.168) | -0.037                    |
| S2-S3                  | <b>18.737</b> | 18.638 | 18.173 | 18.351 | 18.485 | 18.398 | 18.409 (0.171) | 0.328                     |
| S1-S3                  | <b>31.159</b> | 31.095 | 30.845 | 30.804 | 31.049 | 31.122 | 30.983 (0.147) | 0.176                     |
| S3-S4                  | <b>8.218</b>  | 8.131  | 8.315  | 8.469  | 8.196  | 8.322  | 8.286 (0.130)  | -0.068                    |
| S4-S5                  | <b>19.913</b> | 20.148 | 19.658 | 19.363 | 19.879 | 19.961 | 19.801 (0.301) | 0.112                     |
| S5-S6                  | <b>16.351</b> | 16.154 | 16.194 | 16.137 | 16.246 | 16.047 | 16.155 (0.073) | 0.196                     |
| S4-S6                  | <b>34.858</b> | 34.996 | 34.745 | 34.173 | 34.900 | 34.848 | 34.732 (0.325) | 0.126                     |

LOCAL CARE ACCURACY ANGOLAR MEASUREMENTS  
ed errore medio angolare

| Misure angolari su Netfab | Imetric | Care 1  | Care 2  | Care 3  | Care 4  | Care 5  | Media Care     | Errore medio angolare |
|---------------------------|---------|---------|---------|---------|---------|---------|----------------|-----------------------|
| S1-S2-S3                  | 147.24° | 147.68° | 149.92° | 148.82° | 147.60° | 147.69° | 148.34° (1.01) | -1.1°                 |
| S1-S3-S5                  | 102.05° | 101.78° | 101.49° | 101.59° | 101.82° | 102.34° | 101.80° (0.32) | 0.25°                 |
| S4-S5-S6                  | 149.74° | 149.17° | 149.86° | 147.19° | 149.14° | 149.37° | 148.94° (1.02) | 0.8°                  |
| S1-S3-S6                  | 85.52°  | 84.96°  | 85.23°  | 85.22°  | 85.44°  | 85.54°  | 85.27° (0.22)  | 0.25°                 |

## LOCAL PLANE ACCURACY LINEAR MEASUREMENTS

| Misure lineari su Geomagic | Imetric | Plan 1 | Plan 2 | Plan 3 | Plan 4 | Plan 5 | Media Plan     | Errore medio lineare Plan |
|----------------------------|---------|--------|--------|--------|--------|--------|----------------|---------------------------|
| S1-S2                      | 13.807  | 13.849 | 13.933 | 13.611 | 13.746 | 14.008 | 13.829 (0.156) | - 0.022                   |
| S2-S3                      | 18.737  | 18.514 | 18.304 | 18.214 | 18.245 | 18.195 | 18.294 (0.129) | 0.443                     |
| S1-S3                      | 31.159  | 31.146 | 30.969 | 30.703 | 30.890 | 30.937 | 30.929 (0.159) | 0.23                      |
| S3-S4                      | 8.218   | 8.016  | 8.205  | 8.003  | 8.244  | 8.164  | 8.126 (0.110)  | 0.092                     |
| S4-S5                      | 19.913  | 20.123 | 19.927 | 19.796 | 19.784 | 19.716 | 19.869 (0.161) | 0.044                     |
| S5-S6                      | 16.351  | 15.760 | 15.920 | 15.977 | 16.060 | 15.927 | 15.928 (0.109) | 0.423                     |
| S4-S6                      | 34.858  | 34.927 | 34.870 | 34.785 | 34.835 | 34.732 | 34.829 (0.075) | 0.029                     |

LOCAL PLANE ACCURACY ANGOLAR  
MEASUREMENTS ed errore medio angolare

| Misure angolari su Netfab | Imetric | Plan 1  | Plan 2  | Plan 3  | Plan 4  | Plan 5  | Media Plan     | Errore medio angolare |
|---------------------------|---------|---------|---------|---------|---------|---------|----------------|-----------------------|
| S1-S2-S3                  | 147.24° | 149.49° | 147.52° | 149.20° | 148.87° | 148.15° | 148.64° (0.80) | - 1.4°                |
| S1-S3-S5                  | 102.05° | 104.78° | 103.94° | 106.46° | 104.82° | 104.92° | 104.98° (0.91) | - 2.93°               |
| S4-S5-S6                  | 149.74° | 149.53° | 150.74° | 151.88° | 151.09° | 151.04° | 150.85° (0.85) | - 1.11°               |
| S1-S3-S6                  | 85.52°  | 87.54°  | 88.93°  | 91.19°  | 89.08°  | 89.07°  | 89.16° (1.30)  | - 3.64°               |

# OVERALL RESULTS OF LOCAL TRUENESS FOR THE FOUR DIFFERENT SCANNERS IN THE TOTALLY EDENTULOUS MODEL

**Accuratezza locale lineare errore medio**

| Misure lineari | Trios  | Zfx    | Care   | Plan    |
|----------------|--------|--------|--------|---------|
| S1-S2          | -0.025 | -0.268 | -0.037 | - 0.022 |
| S2-S3          | 0.01   | 0.069  | 0.328  | 0.443   |
| S1-S3          | -0.058 | -0.176 | 0.176  | 0.23    |
| S3-S4          | 0.096  | -0.087 | -0.068 | 0.092   |
| S4-S5          | 0.008  | -0.182 | 0.112  | 0.044   |
| S5-S6          | 0.257  | 0.119  | 0.196  | 0.423   |
| S4-S6          | 0.034  | -0.388 | 0.126  | 0.029   |

**Trios errore medio assoluto lineare 0.069 (0.088)**  
**Care errore medio assoluto lineare 0.149 (0.096)**  
**Zfx errore medio assoluto lineare 0.184 (0.112)**  
**Plane errore medio assoluto lineare 0.183 (0.184)**

**Accuratezza locale angolare errore medio**

|          | Trios   | Zfx    | Care  | Plane   |
|----------|---------|--------|-------|---------|
| S1-S2-S3 | - 0.47° | 0.28°  | -1.1° | - 1.4°  |
| S1-S3-S5 | 0.06°   | 0.52°  | 0.25° | - 2.93° |
| S4-S5-S6 | - 0.09° | -0.51° | 0.8°  | - 1.11° |
| S1-S3-S6 | 0.00°   | 0.22°  | 0.25° | - 3.64° |

**Trios errore medio assoluto angolare 0.15° (0.21°)**  
**Zfx errore medio assoluto angolare 0.38° (0.15°)**  
**Care errore medio assoluto 0.6° (0.42°)**  
**Plane errore medio angolare 2.27° (1.21°)**
